# Supplementary material
Source: publisher figshare collection journal article supplement (https://acs.figshare.com/ndownloader/files/7393807)
Supplement: Supplementary file 1 [file 7393807]

## SUPPORTING INFORMATION

# Stereospecific Intramolecular Arylation of 2- and 3-Pyridyl Substituted Alkylamines via Configurationally Stable $\alpha$ -Pyridyl Organolithiums

Julien Maury<sup>‡</sup>, Wojciech Zawodny<sup>‡</sup> and Jonathan Clayden

|                                                                  |     |
|------------------------------------------------------------------|-----|
| SUPPORTING INFORMATION.....                                      | 1   |
| General Information .....                                        | 2   |
| General Experimental Procedure.....                              | 3   |
| Effect of the temperature reaction on the er .....               | 5   |
| Synthetic procedures .....                                       | 6   |
| - Urea formation .....                                           | 11  |
| - LDA-mediated rearrangement of ureas and their hydrolysis ..... | 28  |
| React-IR experiments pictures .....                              | 42  |
| NMR.....                                                         | 44  |
| HPLC data.....                                                   | 110 |
| X-RAY .....                                                      | 123 |

## General Information

All reactions were performed under a nitrogen or argon atmosphere in flame-dried apparatus. All reagents and chemicals were bought from chemical suppliers and used without further purification (unless otherwise stated). Tetrahydrofuran (THF) was distilled under nitrogen from sodium wire using benzophenone as an indicator. Triethylamine was stored over KOH. All solvents were removed under vacuum using a rotary evaporator. Pet.Ether indicates fractions of petroleum ether boiling at 40-60 °C. LDA was used as a solution in THF/heptane/ethylbenzene (2.0 M from sigma Aldrich) or prepared by General procedure 6. -78 °C, -40 °C and other low temperatures were reached using a Thermo Scientific Haake Immersion Cooler EK90.

Thin layer chromatography (TLC) was performed using commercially available pre-coated plates (Macherey-Nagel alugram SIL G/UV254). Visualisation was Via UV light (at 254 nm) or by staining with phosphomolybdic acid or 'Seebach' dip (2.50 g phosphomolybdic acid hydrate, 1.00 g cerium (IV) sulphate tetrahydrate, 3.20 mL conc. H<sub>2</sub>SO<sub>4</sub>, 90.50 mL H<sub>2</sub>O) then heating. Flash column chromatography used chromatography grade silica, 60 Å particle size, 40-63 microns from Aldrich and compounds were loaded as saturated solutions in the correct solvents.

Capillary melting points were determined on a Stuart Scientific melting point SMP 10 apparatus and are uncorrected. Optical rotations  $[\alpha]_{\lambda}^T$  were recorded on an AA-100 polarimeter using a cell with a pathlength of 0.25 dm at 18-22 °C with the solvent and concentration (c) quoted in g/100 mL.

Nuclear Magnetic Resonance (NMR) spectra (1H NMR and 13C NMR) were recorded on either Bruker Ultrashield 300 (Avance), 400 (Avance III or Avance III HD fitted with nitrogen cooled prodigy cold probe) or 500 MHz (Avance II) spectrometers. The residual solvent peak for CDCl<sub>3</sub> ( $\delta_H$ : 7.26 ppm;  $\delta_C$ : 77.16 ppm), CD<sub>3</sub>OD ( $\delta_H$ : 3.31 ppm;  $\delta_C$ : 49.00 ppm) were used as internal standards when assigning NMR spectra.<sup>1</sup>

Chemical shifts,  $\delta$ , are quoted in parts per million (ppm) downfield of trimethylsilane. Coupling constants (*J*) are reported to the nearest 0.1 Hz. The splitting patterns for the spectra assignment are abbreviated to: singlet (s), doublet (d), triplet (t), quartet (q), quintet (quin.), septet (sept.), multiplet (m), broad (br.) and some as a combination of these.

Infrared spectra were recorded on a Thermo Scientific iD5 ATR, FT-IR spectrometer, using a Universal ATR accessory for sampling, with absorption of most relevance quoted as  $\nu$  in cm<sup>-1</sup> and the samples were run as solids or evaporated films.

Low and high resolution mass spectra were recorded mainly by staff at the University of Manchester. ESI were recorded on a Micromass Platform II or Waters QTOF; high resolution mass spectra (HRMS) were recorded on a Thermo Finnigan MAT95XP mass spectrometer or Waters.

---

<sup>1</sup> Gottlieb, H. E.; Kotlyar, V.; Nudelman, A. *J. Org. Chem.* **1997**, 62, 7512

## General Experimental Procedure

### General procedure 1: Urea formation from carbamoyl chloride (**9**, **10**, **17** and **18**)

The pyridine-derived amine **5** or **6** (1.0 equiv), anhydrous acetonitrile (0.4 M) and triethylamine (1.1 equiv) were combined and stirred for 10 minutes under nitrogen at room temperature. The carbamoyl chloride (1.0 equiv) was added. The reaction mixture was heated to reflux overnight. The reaction mixture was cooled to room temperature and quenched with saturated aqueous NaHCO<sub>3</sub> solution. The organic layer was removed and the aqueous layer was extracted twice with CH<sub>2</sub>Cl<sub>2</sub>. The combined organic layers were washed with NH<sub>4</sub>Cl and brine and dried over MgSO<sub>4</sub>, and the solvent was removed under reduced pressure. The crude product was purified by flash column chromatography.

### General procedure 2: Methylation of ureas (**7** and **8**)

#### *A – in THF as a solvent*

The urea derivative **17** (1.0 equiv) was dissolved in anhydrous THF (0.4 M) and methyl iodide (1.2 eq) was added. The solution was cooled to 0 °C before sodium hydride (1.3 equiv, (60% suspension in oil)) was added. The reaction was allowed to warm to room temperature, monitored by TLC and worked up when complete (between 2 hours and overnight). The reaction mixture was quenched with MeOH and saturated aqueous NH<sub>4</sub>Cl solution was added before being extracted three times with ethyl acetate. The combined organic extracts were washed twice with water and once with brine then dried over MgSO<sub>4</sub> and concentrated *in vacuo*. The crude product was purified by flash column chromatography.

#### *B – in DMF as a solvent*

To a solution of the urea derivative **18** (1.0 equiv) in anhydrous DMF (0.1 M) at 0 °C was added sodium hydride (1.5 equiv, (60% suspension in oil)). The reaction mixture was stirred at 0 °C for 15 min, then methyl iodide was added dropwise. The reaction was allowed to warm to room temperature, monitored by TLC and worked up when complete (1 h - overnight). The reaction mixture was quenched with H<sub>2</sub>O. The solvent was evaporated *in vacuo*. The residue was dissolved in CH<sub>2</sub>Cl<sub>2</sub> and extracted from H<sub>2</sub>O three times. The combined organic phase was washed three times with 5% aqueous LiCl solution and once with brine, then dried over MgSO<sub>4</sub> and concentrated *in vacuo*. The crude product was purified by flash column chromatography.

### General procedure 3: LDA-mediated rearrangement of ureas (**11**, **13**, **14** and **15**)

A solution of a pyridine derivative (1.0 equiv) in anhydrous THF (0.1 M) was cooled to -78 °C and LDA (2.5 equiv) was added dropwise. After stirring at -78 °C for 3-18 h the reaction mixture was quenched with NH<sub>4</sub>Cl or MeOH. The mixture was extracted three times with ethyl acetate, dried over MgSO<sub>4</sub>, and concentrated under reduced pressure. The crude product was purified by flash column chromatography.

**General procedure 4: Hydrolysis of ureas (**12** and **16**)**

A solution of a pyridine derivative (1.0 equiv), aqueous NaOH (2.0 M) and EtOH (1.2 M) was microwaved at 130 °C for 3 h. The reaction mixture was concentrated and extracted with ethyl acetate, dried over MgSO<sub>4</sub>, and concentrated under reduced pressure.

**General procedure 5: Amine protection**

To a solution of aminopyridine (1.0 equiv) in methanol (0.2 M) were added *p*-anisaldehyde (1.05 equiv) and NaOAc (2.05 equiv) and stirred at room temperature for 15 minutes. The reaction mixture was cooled to 0 °C and NaBH(OAc)<sub>3</sub> (2.05 equiv) was added portionwise. After stirring for 18 h at room temperature, the solvent was evaporated. The crude mixture was dissolved in EtOAc, washed (with NaHCO<sub>3</sub> and brine), dried over MgSO<sub>4</sub>, and concentrated under reduced pressure.

**General procedure 6: Preparation of LDA**

To a cooled solution of distilled diisopropylamine (1.0 equiv.) in THF (0.75 M) at 0 °C was added *n*-BuLi (1.0 equiv.) The reaction mixture was stirred at 0 °C for 20 min before immediate use.

For clarity, compounds **6d**, **6e**, **17a-h** and **18a-c** were not included in the main text, but were isolated and purified before **7a-h** were made.

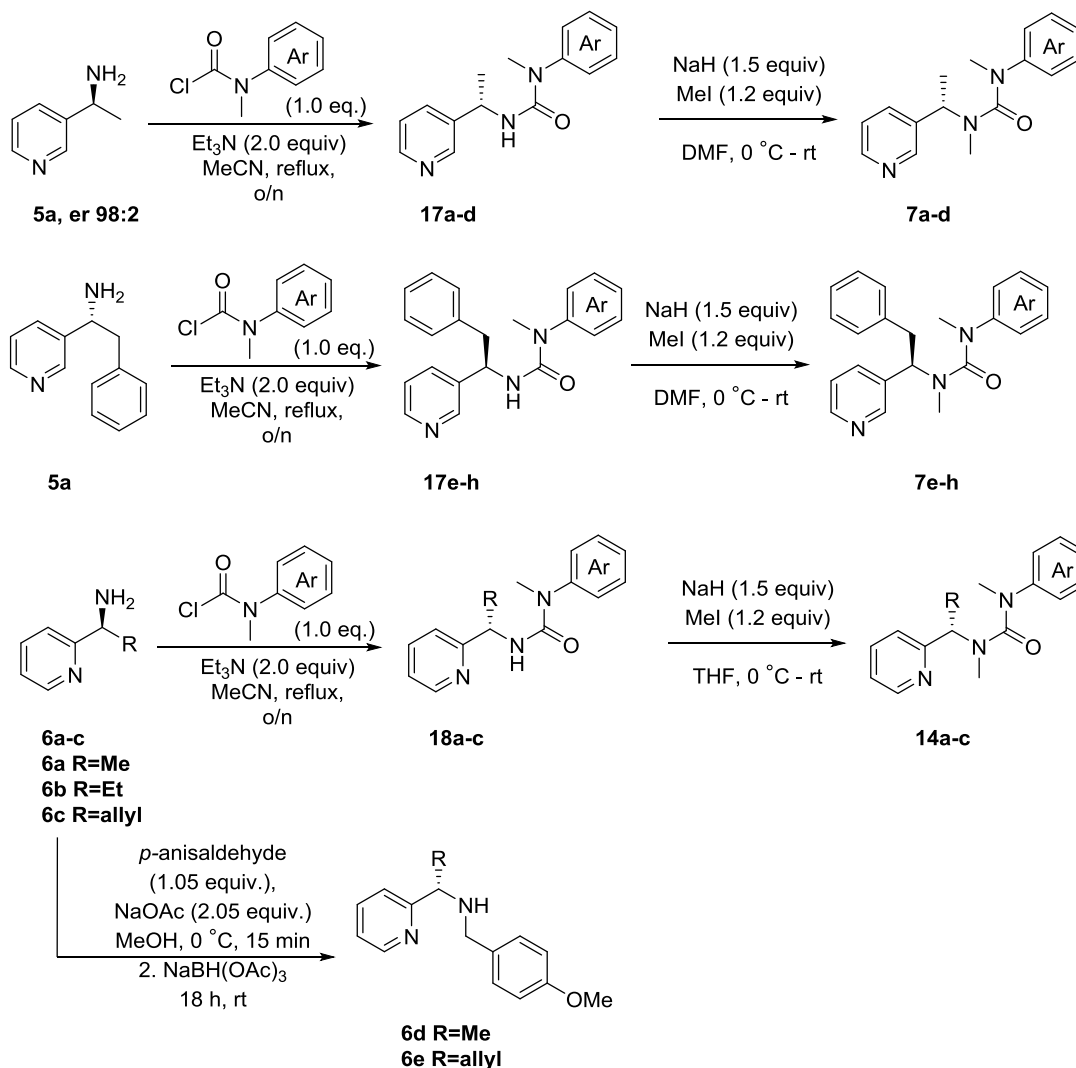

### Effect of the temperature reaction on the er (HPLC traces of **14b** in HPLC part)

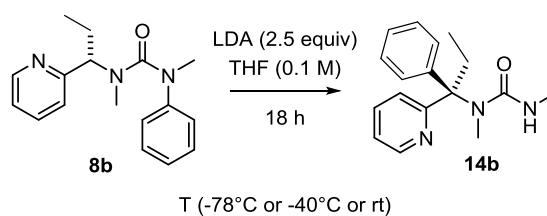

- Conditions A : LDA (2.5 equiv) in THF at **-78 °C** for 18 hours => **er > 99:1**
- Conditions B : LDA (2.5 equiv) in THF at **-40 °C** for 18 hours => **er = 98:2**
- Conditions C : LDA (2.5 equiv) in THF at **room temperature** for 18 hours => **er = 86:4**

## Synthetic procedures

### (*R,E*)-2-methyl-*N*-(1-(pyridin-3-yl)ethylidene)propane-2-sulfonamide ((*R*)-1)<sup>2</sup>

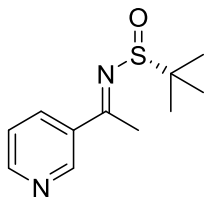

Procedure by Chellucci *et al.* was followed.<sup>2</sup> A solution of 1-(pyridin-3-yl)ethan-1-one (4.54 mL, 41.27 mmol), (*R*)-(+)-2-methylpropane-2-sulfonamide (5.0 g, 41.27 mmol) and Ti(OEt)<sub>4</sub> (18.8 g, 82.6 mmol) in CH<sub>2</sub>Cl<sub>2</sub> (165 mL) was refluxed for 72 h. The reaction mixture was allowed to cool down to room temperature, then it was concentrated *in vacuo*. The residue was dissolved in EtOAc (200 mL). The solution was stirred vigorously and brine was added (150 mL) slowly. After 15 min, the mixture was filtered over a pad of Celite, and the filter cake was washed with copious amounts of EtOAc. The filtrate was dried over MgSO<sub>4</sub>. The solvent was evaporated *in vacuo* and the crude was purified by flash column chromatography (SiO<sub>2</sub>, 99:1 to 95:5 CH<sub>2</sub>Cl<sub>2</sub>:MeOH) to give (*R*)-1 as yellow oil (5.73 g, 61%). <sup>1</sup>H NMR (400 MHz, CDCl<sub>3</sub>) δ = 9.14-9.03 (1H, m, =CH), 8.71 (1H, dd, *J* = 4.8, 1.7, =CH), 8.16 (1H, ddd, *J* = 8.1, 2.4, 1.6, =CH), 7.38 (1H, ddd, *J* = 8.0, 4.8, 0.9, =CH), 2.80 (3H, s, N=C-CH<sub>3</sub>), 1.33 (9H, s, C(CH<sub>3</sub>)<sub>3</sub>). <sup>13</sup>C NMR (101 MHz, CDCl<sub>3</sub>) δ = 174.4 (C=N), 152.4 (=CH), 148.8 (=CH), 134.6 (=CH), 134.4 (=C), 123.5 (=CH), 58.0 (C(CH<sub>3</sub>)<sub>3</sub>), 22.7 (C(CH<sub>3</sub>)<sub>3</sub>), 19.8 (N=C-CH<sub>3</sub>).

### (*R,E*)-2-methyl-*N*-(pyridin-3-ylmethylene)propane-2-sulfonamide ((*R*)-2)<sup>3</sup>

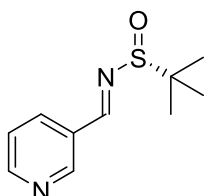

Literature procedure was followed.<sup>3</sup> To a solution of 3-pyridinecarboxaldehyde (6.00 mL, 63.58 mmol) and (*R*)-(+)-2-methylpropane-2-sulfonamide (7.72 g, 63.58 mmol) in anhydrous THF was added Ti(OEt)<sub>4</sub> (29.00 g, 127.2 mmol). The reaction mixture turned instantly orange and was stirred at room temperature overnight. Brine (100 mL) was added to the vigorously stirred reaction mixture. The suspension was filtered through a pad of Celite. The filter cake was washed with copious amount of EtOAc. The organic phase was washed with brine, dried over MgSO<sub>4</sub> and evaporated *in vacuo*. The crude was purified by flash column chromatography (SiO<sub>2</sub>, 60:40 to 100:0 EtOAc:Petrol) to give (*R*)-2 as yellow oil (5.73 g, 61%). <sup>1</sup>H NMR (400 MHz, CDCl<sub>3</sub>) δ = 9.03 (1H, dd, *J* = 2.1, 0.9, =CH), 8.74 (1H, dd, *J* = 4.8, 1.7, =CH), 8.65 (1H, s, =CH), 8.17 (1H,

<sup>2</sup> Data in agreement with the literature (Reference: Chellucci, G.; Baldino, S.; Chessa, S.; Pinna, G. A.; Soccolini, F.; *Tetrahedron: Asymmetry*, **2006**, *17*, 3163)

<sup>3</sup> Data in accordance with the literature (Liu, G.; Cogan, D. A.; Owens, T. D.; Tang, T. P.; Ellman, J. A. *J. Org. Chem.*, **1999**, *64*, 1278)

dt,  $J = 8.0, 1.9$ , =CH), 7.46 – 7.40 (1H, m, =CH), 1.28 (9H, s, (C(CH<sub>3</sub>)<sub>3</sub>)). <sup>13</sup>C NMR (126 MHz, CDCl<sub>3</sub>)  $\delta = 160.5$  (N=CH), 153.0 (=CH), 151.1 (=CH), 135.9 (=CH), 129.9 (=C), 124.1 (=CH), 58.3 (C(CH<sub>3</sub>)<sub>3</sub>), 22.8 (C(CH<sub>3</sub>)<sub>3</sub>).

**(*R*)-2-methyl-*N*-((*S*)-1-(pyridin-3-yl)ethyl)propane-2-sulfonamide (**3a**, dr 98:2)<sup>2</sup>**

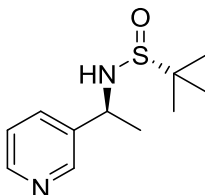

Procedure by Chellucci *et al.* was followed.<sup>2</sup> To a solution of **1** (2.01 g, 8.96 mmol) in anhydrous THF (90 mL) at -78 °C was added dropwise tri-*sec*-butylborohydride (L-Selectride) (1.0 M solution in THF, 8.96 mL, 8.96 mmol). The reaction mixture was stirred at -78 °C overnight, then allowed to warm up to room temperature, quenched with saturated aqueous solution of NH<sub>4</sub>Cl. The organic and aqueous phases were separated, the aqueous layer was extracted twice with EtOAc. The combined organic extracts were washed with brine, dried over MgSO<sub>4</sub> and evaporated *in vacuo* to yield a crude brown oil, which was purified by flash column chromatography (SiO<sub>2</sub>, 95:5 CH<sub>2</sub>Cl<sub>2</sub>:MeOH) to yield **3a** as a yellow oil (1.46 g, 72%, >95:5 d.r. (*R<sub>S,S</sub>*):(*R,R*)). The exact diastereomeric ratio (d.r. 98:2) was later confirmed by er of **7b** and **7c**, which were determined by chiral HPLC.

<sup>1</sup>H NMR (500 MHz, CDCl<sub>3</sub>)  $\delta = 8.58$  (1H, d,  $J = 2.3$ , =CH), 8.50 (1H, dd,  $J = 4.8, 1.6$ , =CH), 7.62 (1H, dt,  $J = 7.9, 2.0$ , =CH), 7.25 (1H, dd,  $J = 7.9, 4.8$ , =CH), 4.59 (1H, qd,  $J = 6.7, 3.4$ , CH-CH<sub>3</sub>), 3.40 (1H, d,  $J = 2.7$ , NH), 1.55 (3H, d,  $J = 6.7$ , CH-CH<sub>3</sub>), 1.18 (9H, s, C(CH<sub>3</sub>)<sub>3</sub>). <sup>13</sup>C NMR (126 MHz, CDCl<sub>3</sub>)  $\delta = 149.0$  (=CH), 148.8 (=CH), 138.80 (=C), 134.6 (=CH), 123.5 (=CH), 55.8 (C(CH<sub>3</sub>)<sub>3</sub>), 52.5 (CH-CH<sub>3</sub>), 24.9 (CH-CH<sub>3</sub>), 22.5 (C(CH<sub>3</sub>)<sub>3</sub>). HRMS (ESI<sup>+</sup>):  $m/z$  calcd for C<sub>11</sub>H<sub>19</sub>N<sub>2</sub>OS [M+H]<sup>+</sup> 227.1213, found 227.1213.

**(*R*)-2-methyl-*N*-((*S*)-1-(pyridin-3-yl)ethyl)propane-2-sulfonamide (**3a**, dr 73:27)<sup>2</sup>**

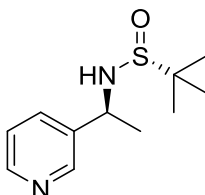

To a solution of **2** (6.00 g, 28.54 mmol) in CH<sub>2</sub>Cl<sub>2</sub> (140 mL) at -40 °C was added dropwise methylmagnesium bromide (3.0 M solution in Et<sub>2</sub>O, 19.1 mL, 57.12 mmol). The reaction mixture was stirred overnight at -40 °C, then warmed up to room temperature, quenched with saturated aqueous solution of NH<sub>4</sub>Cl. The organic and aqueous phases were separated, the aqueous layer was extracted twice with EtOAc. The combined organic extracts were washed with brine, dried over MgSO<sub>4</sub> and evaporated *in vacuo* to give a crude mixture of diastereoisomers **3a** (d.r. 73:27) that was used without further purification. <sup>1</sup>H NMR (500 MHz, CDCl<sub>3</sub>)  $\delta = 8.62$ -8.59 (1H, m, =CH, major and minor isomer), 8.55 (0.27H, dd,  $J = 4.9, 1.8$ , =CH, minor

isomer), 8.53 (0.73H, dd,  $J = 4.8, 1.7$ , =CH, major isomer), 7.68 (0.27H, dt,  $J = 7.9, 2.0$ , =CH, minor isomer), 7.64 (0.73H, dt,  $J = 7.9, 2.0$  Hz, =CH, major isomer), 7.31 – 7.24 (1H, m, =CH, major and minor isomer), 4.66 – 4.54 (1H, m, CH-CH<sub>3</sub>, major and minor isomer), 3.42 (0.27H, d,  $J = 2.9$ , NH, minor isomer), 3.34 (0.73H, d,  $J = 3.4$ , major isomer), 1.57 (2.19H, d,  $J = 6.7$ , CH-CH<sub>3</sub>, major isomer), 1.55 (0.81H, d,  $J = 6.7$ , CH-CH<sub>3</sub>, minor isomer), 1.24 (2.43H, s, C(CH<sub>3</sub>)<sub>3</sub>, minor isomer), 1.20 (6.57H, s, C(CH<sub>3</sub>)<sub>3</sub>, major isomer).

**(*R*)-2-methyl-*N*-((*R*)-2-phenyl-1-(pyridin-3-yl)ethyl)propane-2-sulfonamide (*R<sub>S</sub>,R*-3b)<sup>4</sup> and (*R*)-2-methyl-*N*-((*S*)-2-phenyl-1-(pyridin-3-yl)ethyl)propane-2-sulfonamide (*R<sub>S</sub>,S*-3b))**

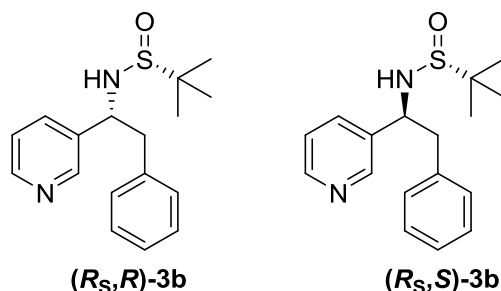

To a solution of **2** (3.46 g, 16.45 mmol) in CH<sub>2</sub>Cl<sub>2</sub> (97 mL) at -40 °C was added dropwise benzylmagnesium chloride (2.0 M solution in THF, 16.5 mL, 32.90 mmol). The reaction mixture was stirred overnight at -40 °C, then warmed up to room temperature, quenched with saturated aqueous solution of NH<sub>4</sub>Cl. The organic and aqueous phases were separated, the aqueous layer was extracted twice with EtOAc. The combined organic extracts were washed with brine, dried over MgSO<sub>4</sub> and evaporated *in vacuo* to give a crude mixture of diastereoisomers (72:28 ratio of (*R<sub>S</sub>,R*)-**3b** to (*R<sub>S</sub>,S*)-**3b** determined by <sup>1</sup>H NMR) that was separated by flash column chromatography (SiO<sub>2</sub>, EtOAc, then 90:10 CH<sub>2</sub>Cl<sub>2</sub>:MeOH) to yield (*R<sub>S</sub>,R*)-**3b** as a yellow oil (3.21 g, 64%) and (*R<sub>S</sub>,S*)-**3b** as a white solid (0.92 g, 19%). (*R<sub>S</sub>,R*)-**3b**: *R<sub>f</sub>* 0.1 (EtOAc). <sup>1</sup>H NMR (500 MHz, CDCl<sub>3</sub>)  $\delta$  = 8.45 (1H, d,  $J = 2.3$ , =CH), 8.41 (1H, dd,  $J = 4.8, 1.6$ , =CH), 7.51 (1H, dt,  $J = 8.0, 2.0$ , =CH), 7.22 – 7.04 (4H, m, 4 x =CH), 6.98 – 6.92 (2H, m, 2 x =CH), 4.55 (1H, td,  $J = 7.2, 4.9$ , CHNH), 3.80 (1H, d,  $J = 5.1$ , CHNH), 3.26 (1H, dd,  $J = 13.5, 6.9$ , CH<sub>A</sub>H<sub>B</sub>Bn), 2.95 (1H, dd,  $J = 13.5, 7.5$ , CH<sub>A</sub>H<sub>B</sub>Bn), 1.07 (9H, s, C(CH<sub>3</sub>)<sub>3</sub>). <sup>13</sup>C NMR (126 MHz, CDCl<sub>3</sub>)  $\delta$  = 148.9 (=CH), 148.7 (=CH), 137.6 (=C), 136.7 (=C), 135.5 (=CH), 129.7 (=CH), 128.5 (=CH), 126.9 (=CH), 123.6 (=CH), 59.1 (CH-Bn), 56.4 (C(CH<sub>3</sub>)<sub>3</sub>), 43.5 (CH<sub>2</sub>Ph), 22.6 (C(CH<sub>3</sub>)<sub>3</sub>). (*R<sub>S</sub>,S*)-**3b**: *R<sub>f</sub>* 0.3 (EtOAc). <sup>1</sup>H NMR (500 MHz, CDCl<sub>3</sub>)  $\delta$  = 8.52 – 8.42 (2H, m, 2 x =CH), 7.49 (1H, dt,  $J = 7.9, 2.0$ , =CH), 7.26 – 7.12 (4H, m, 4 x =CH), 7.05 – 6.99 (2H, m, 2 x =CH), 4.62 (1H, ddd,  $J = 8.4, 6.5, 2.3$ , CHNH), 3.55 (1H, d,  $J = 2.3$ , CHNH), 3.10 – 2.92 (2H, m, CH<sub>2</sub>Ph), 1.08 (9H, s, C(CH<sub>3</sub>)<sub>3</sub>). <sup>13</sup>C NMR (126 MHz, CDCl<sub>3</sub>)  $\delta$  = 149.5 (=CH), 149.2 (=CH), 136.9 (=C), 136.0 (=C), 135.7 (=CH), 129.6 (=CH), 129.0 (=CH), 127.4 (=CH), 123.4 (=CH), 57.3 (CH-Bn), 55.9 (C(CH<sub>3</sub>)<sub>3</sub>), 45.3 (CH<sub>2</sub>Ph), 22.6 (C(CH<sub>3</sub>)<sub>3</sub>). **Mp** = 112-114 °C. **IR** (film, cm<sup>-1</sup>):  $\nu_{\max}$  = 3194, 3028, 1578, 1454, 1428, 1363, 1057.  $[\alpha]_{\text{D}}^{25}$  = -20 ( $c = 1.00$ ; CH<sub>2</sub>Cl<sub>2</sub>). **HRMS** (ESI<sup>+</sup>):  $m/z$  calcd for C<sub>17</sub>H<sub>23</sub>N<sub>2</sub>OS [M+H]<sup>+</sup> 303.1526, found 303.1525.

<sup>4</sup> Data for (*R<sub>S</sub>,R*)-**3b** in accordance with the literature (Reference: Buesking, A. W.; Baguley, T. D.; Ellman, J. A.; *Org. Lett.*, 2011, 13, 964)

**(S)-1-(pyridin-3-yl)ethan-1-amine (5a, er 98:2)<sup>5</sup>**

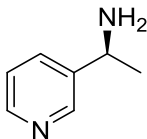

To a solution of **3aa** (4.50 g, 19.88 mmol) in anhydrous MeOH (100 mL) was added HCl in dioxane (4.0 M, 24.9 mL, 99.4 mmol). Reaction mixture was stirred for 2 h, evaporated *in vacuo* and the solid residue was washed with Et<sub>2</sub>O and then dissolved in 1 M aqueous KOH solution until pH was higher than 10. The aqueous phase was extracted three times with EtOAc. The combined organic extract was dried over MgSO<sub>4</sub> and evaporated *in vacuo* to give **5a (er 98:2)** as brown oil (1.60 g, 66%) that was used without further purification.

<sup>1</sup>H NMR (400 MHz, CDCl<sub>3</sub>)  $\delta$  = 8.53 (1H, t,  $J$  = 1.9, =CH), 8.48 – 8.37 (1H, m, =CH), 7.70 – 7.60 (1H, m, =CH), 7.27 – 7.13 (1H, m, =CH), 4.12 (1H, q,  $J$  = 6.7, CH-CH<sub>3</sub>), 1.50 (2H, s, NH<sub>2</sub>), 1.34 (3H, d,  $J$  = 6.6, CH-CH<sub>3</sub>); <sup>13</sup>C NMR (101 MHz, CDCl<sub>3</sub>)  $\delta$  = 148.6 (=CH), 148.2 (=CH), 142.7 (=C), 133.4 (=CH), 123.6 (=CH), 49.2 (CH-CH<sub>3</sub>), 25.8 (CH-CH<sub>3</sub>). HRMS (ESI<sup>+</sup>):  $m/z$  calcd for C<sub>7</sub>H<sub>11</sub>N<sub>2</sub> [M+H]<sup>+</sup> 123.0917, found 123.0920.

**(S)-1-(pyridin-3-yl)ethan-1-amine (5a, er 73:27)**

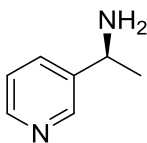

Same procedure and data as for **5a (er 98:2)**, (**3a, dr 73:27**) used as the starting material instead.

**(R)-2-phenyl-1-(pyridin-3-yl)ethan-1-amine (5b)<sup>5</sup>**

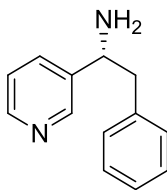

To a solution of (*R*,*R*)-**3b** (5.20 g, 17.19 mmol) in anhydrous MeOH (85 mL) was added HCl in dioxane (4.0 M, 21.5 mL, 86.0 mmol). Reaction mixture was stirred for 2 h, evaporated *in vacuo* and the solid residue was washed with Et<sub>2</sub>O and then dissolved in 1 M aqueous KOH solution until pH was higher than 10. The aqueous phase was extracted three times with EtOAc. The combined organic extract was dried over MgSO<sub>4</sub> and evaporated *in vacuo* to give **5b** as brown oil (2.90 g, 85%) that was used without further purification.

<sup>1</sup>H NMR (400 MHz, CDCl<sub>3</sub>)  $\delta$  = 8.50 (1H, d,  $J$  = 2.2, =CH), 8.44 (1H, dd,  $J$  = 4.8, 1.7, =CH), 7.63 (1H, ddd,  $J$  = 7.9, 2.3, 1.6, =CH), 7.29 – 7.12 (4H, m, 4 x =CH), 7.10 – 7.06 (2H, m, 2 x =CH), 4.18 (1H, dd,  $J$  = 8.7, 5.2, CH-CH<sub>2</sub>), 2.92 (1H, dd,  $J$  = 13.4, 5.2, CH-CH<sub>A</sub>H<sub>B</sub>), 2.78 (1H, dd,  $J$  = 13.3, 8.7, CH-CH<sub>A</sub>H<sub>B</sub>), 1.50 (2H, s, NH<sub>2</sub>). <sup>13</sup>C NMR

<sup>5</sup> The data are in agreement with the literature (Reference: Baucom, K. D.; Guram, A. S.; Borths, C. J. *Synlett*, 2015, 26, 201).

(101 MHz, CDCl<sub>3</sub>)  $\delta$  = 148.8 (2 x =CH), 140.8 (=C), 138.3 (=C), 134.2 (=CH), 129.5 (=CH), 128.7 (=CH), 126.8 (=CH), 123.5 (=CH), 55.4 (N-CH-CH<sub>2</sub>), 46.4 (N-CH-CH<sub>2</sub>). **HRMS** (ESI<sup>+</sup>):  $m/z$  calcd for C<sub>13</sub>H<sub>15</sub>N<sub>2</sub> [M+H]<sup>+</sup> 199.1230, found 199.1230.

**(S)-N-(4-methoxybenzyl)-1-phenyl-1-(pyridin-3-yl)ethan-1-amine (5c)**

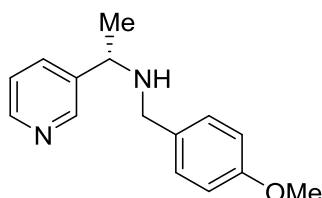

Following General procedure 5, aminopyridine **5a**, **er 73:27** (2.075 g, 16.99 mmol), *p*-anisaldehyde (2.17 mL, 17.83 mmol), NaOAc (2.86 g, 34.82 mmol) and NaBH(OAc)<sub>3</sub> (7.38 g, 34.82 mmol) in MeOH (77 mL) gave after purification by flash column chromatography (SiO<sub>2</sub>, 95:5 CH<sub>2</sub>Cl<sub>2</sub>:MeOH) **5c** as an oil (2.27 g, 55%). **<sup>1</sup>H NMR** (500 MHz, CDCl<sub>3</sub>)  $\delta$  = 8.57 (1H, d,  $J$  = 2.2, =CH), 8.51 (1H, dd,  $J$  = 4.8, 1.7, =CH), 7.73 (1H, dt,  $J$  = 8.0, 2.0, =CH), 7.30 – 7.24 (1H, m, =CH), 7.20 – 7.16 (2H, m, 2 x =CH), 6.87 – 6.81 (2H, m, 2 x =CH), 3.84 (1H, q,  $J$  = 6.6, CH-CH<sub>3</sub>), 3.79 (3H, s, OCH<sub>3</sub>), 3.58 (1H, d,  $J$  = 13.0, NHCH<sub>A</sub>H<sub>B</sub>), 3.53 (1H, d,  $J$  = 13.0, NHCH<sub>A</sub>H<sub>B</sub>), 1.68 (1H, br s, NH), 1.37 (3H, d,  $J$  = 6.6, CH-CH<sub>3</sub>). **<sup>13</sup>C NMR** (126 MHz, CDCl<sub>3</sub>)  $\delta$  = 158.8 (=C), 149.2 (=CH), 148.7 (=CH), 140.8 (=C), 134.4 (=CH), 132.4 (=C), 129.4 (=CH), 123.7 (=CH), 114.0 (=CH), 55.4 (OCH<sub>3</sub>), 55.2 (CH-CH<sub>3</sub>), 51.2 (NH-CH<sub>2</sub>), 24.5 (CH-CH<sub>3</sub>).  $[\alpha]_D^{23}$  = -31.7 ( $c$  = 1.00; CH<sub>2</sub>Cl<sub>2</sub>). **IR** (film, cm<sup>-1</sup>):  $\nu_{\max}$  = 3357, 2930, 1365, 1168. **HRMS** (ESI<sup>+</sup>):  $m/z$  calcd for C<sub>15</sub>H<sub>19</sub>N<sub>2</sub>O [M+H]<sup>+</sup> 243.1492, found 243.1497.

**[(4-Methoxyphenyl)methyl][(1S)-1-(pyridin-2-yl)ethyl]amine (6d)**

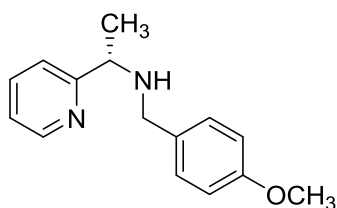

Following General procedure 5, aminopyridine **6a** (440 mg, 3.60 mmol), *p*-anisaldehyde (0.46 mL), NaOAc (605 mg) and NaBH(OAc)<sub>3</sub> (1.56 g) in MeOH (16.4 mL) gave **6d** as an oil (477 mg, 55%). **<sup>1</sup>H NMR** (400 MHz, CDCl<sub>3</sub>)  $\delta$  = 8.63-8.54 (1H, m, =CH), 7.65 (1H, td,  $J$  = 7.7 and 1.8, =CH), 7.34 (1H, d,  $J$  = 7.8, =CH), 7.24-7.20 (2H, m, 2 x =CH), 7.16 (1H, ddd,  $J$  = 14.3, 4.9 and 1.1, =CH), 6.90-6.77 (2H, m, 2 x =CH), 3.90 (1H, q,  $J$  = 6.7, NCHCH<sub>3</sub>), 3.79 (3H, s, OCH<sub>3</sub>), 3.57 (2H, AB pattern,  $J$  = 12.9,  $\Delta\nu$  = 9.0, NHCH<sub>2</sub>), 1.88 (1H, brs, NH), 1.39 (3H, d,  $J$  = 6.7, CHCH<sub>3</sub>). **<sup>13</sup>C NMR** (100 MHz, CDCl<sub>3</sub>)  $\delta$  = 164.8 (=C), 158.6 (=C), 149.5 (=CH), 136.7 (=CH), 132.7 (=C), 129.5 (=CH), 122.0 (=CH), 121.4 (=CH), 113.8 (2 x =CH), 58.7 (NCH), 55.4 (OCH<sub>3</sub>), 51.3 (CH<sub>2</sub>), 23.1 (CH<sub>3</sub>).  $[\alpha]_D^{20}$  = -159 ( $c$  = 1.00; CHCl<sub>3</sub>). **IR** (film, cm<sup>-1</sup>):  $\nu_{\max}$  = 2975, 1214, 1041, 748. **HRMS** (ESI<sup>+</sup>):  $m/z$  calcd for C<sub>15</sub>H<sub>19</sub>N<sub>2</sub>O [M+H]<sup>+</sup> 243.1419, found 243.1495.

**[(4-Methoxyphenyl)methyl][(1S)-1-(pyridin-2-yl)but-3-en-1-yl]amine (6e)**

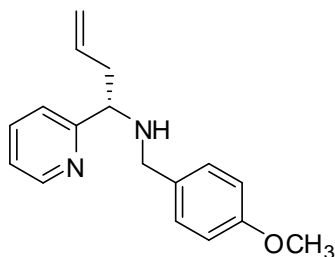

Following General procedure 5, aminopyridine **6c** (200 mg, 1.35 mmol), *p*-anisaldehyde (0.17 ml), NaOAc (227 mg) and NaBH(OAc)<sub>3</sub> (0.59 mg) in MeOH (6.13 ml) gave **6e** as an oil (90 mg, 25%). <sup>1</sup>H NMR (400 MHz, CDCl<sub>3</sub>)  $\delta$  = 8.63-8.51 (1H, m, =CH), 7.66 (1H, td, *J* = 7.6 and 1.8, =CH), 7.37 (1H, d, *J* = 7.8, =CH), 7.23-7.13 (3H, m, 3 x =CH), 6.88-6.79 (2H, m, 2 x =CH), 5.79-5.65 (1H, m, CH<sub>2</sub>=CHCH<sub>2</sub>), 5.10-4.97 (1H, m, CH<sub>2</sub>=CH), 3.82 (1H, dd, *J* = 7.7 and 5.9, NHCHCH<sub>2</sub>), 3.79 (3H, s, OCH<sub>3</sub>), 3.61 (1H, d, *J* = 12.9, NHCH<sub>A</sub>H<sub>B</sub>), 3.51 (1H, d, *J* = 13.0, NHCH<sub>A</sub>H<sub>B</sub>), 2.63-2.35 (2H, m, CHCH<sub>2</sub>CH=), 1.92 (1H, brs, NH). <sup>13</sup>C NMR (100 MHz, CDCl<sub>3</sub>)  $\delta$  = 163.4 (=C), 158.7 (=C), 149.5 (=CH), 136.4 (=CH), 135.4 (=CH), 132.7 (=C), 129.4 (=CH), 122.1 (=CH), 122.0 (=CH), 117.6 (=CH<sub>2</sub>), 113.8 (=CH), 63.0 (NCH), 55.4 (OCH<sub>3</sub>), 51.3 (CH<sub>2</sub>), 41.7 (CH<sub>2</sub>). [ $\alpha$ ]<sub>D</sub><sup>20</sup> = -64 (*c* = 1.00; CHCl<sub>3</sub>). IR (film, cm<sup>-1</sup>):  $\nu_{\max}$  = 3010, 2957, 1639, 1245, 1037, 750. HRMS (ESI<sup>+</sup>): *m/z* calcd for C<sub>17</sub>H<sub>21</sub>N<sub>2</sub>O [M+H]<sup>+</sup> 269.1648, found 269.1650.

**- Urea formation**

**(S)-1-methyl-1-phenyl-3-(1-(pyridin-3-yl)ethyl)urea (17a)**

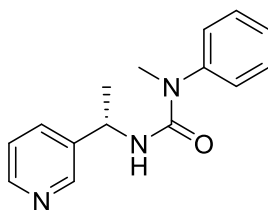

Following General procedure 1, *N*-methyl-*N*-phenyl carbamoyl chloride (416 mg, 2.456 mmol, 1.2 eq.), 3-pyridine **5a (er 98:2)** (250 mg, 2.036 mmol, 1.0 eq.) and Et<sub>3</sub>N (570  $\mu$ l, 4.072 mmol, 2.0 eq.) in acetonitrile (20.0 ml) gave after 20 h heating at reflux a crude product that was purified by flash column chromatography (SiO<sub>2</sub>, 99:1 to 97:3 CH<sub>2</sub>Cl<sub>2</sub>:MeOH) to obtain **17a** as a brown oil (239 mg, 46%). *R*<sub>f</sub> 0.21 (95:5 CH<sub>2</sub>Cl<sub>2</sub>:MeOH). <sup>1</sup>H NMR (400 MHz, CDCl<sub>3</sub>)  $\delta$  = 8.50 (1H, d, *J* = 2.3, =CH), 8.47 (1H, dd, *J* = 4.8, 1.6, =CH), 7.54 (1H, dt, *J* = 7.9, 1.8, =CH), 7.47 – 7.42 (2H, m, 2 x =CH), 7.36 – 7.30 (1H, m, =CH), 7.28 – 7.24 (2H, m, 2 x =CH), 7.22 (ddd, *J* = 7.9, 4.8, 0.7 Hz, 1H, =CH), 5.03 (quin, *J* = 7.1 Hz, 1H, NHCHCH<sub>3</sub>), 4.54 (d, *J* = 7.2 Hz, 1H, NHCHCH<sub>3</sub>), 3.25 (s, 3H, NCH<sub>3</sub>), 1.36 (d, *J* = 7.0 Hz, 3H, NHCHCH<sub>3</sub>). <sup>13</sup>C NMR (126 MHz, CDCl<sub>3</sub>)  $\delta$  = 156.4 (C=O), 148.5 (=CH), 147.9 (=CH), 143.3 (=C), 140.0 (=C), 133.9 (=CH), 130.4 (=CH), 127.7 (=CH), 127.5 (=CH), 123.5 (=CH), 48.3 (NHCHCH<sub>3</sub>), 37.4 (NCH<sub>3</sub>), 22.5 (NHCHCH<sub>3</sub>). [ $\alpha$ ]<sub>D</sub><sup>25</sup> = +90 (*c* = 1.00; CH<sub>2</sub>Cl<sub>2</sub>). IR (film, cm<sup>-1</sup>):  $\nu_{\max}$  = 3327, 2979, 1650, 1495, 1346. HRMS (ESI<sup>+</sup>): *m/z* calcd for C<sub>15</sub>H<sub>18</sub>N<sub>3</sub>O [M+H]<sup>+</sup> 256.1444, found 256.1447.

**(S)-1,3-dimethyl-3-phenyl-1-(1-(pyridin-3-yl)ethyl)urea (7a)**

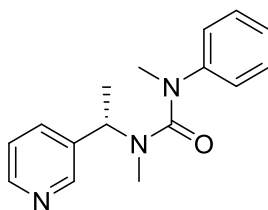

Following general procedure 2B, urea **17a** (193 mg, 0.715 mmol), NaH (43 mg, 1.073 mmol), MeI (53  $\mu$ L, 0.858 mmol) in DMF (10.0 ml) gave after 2.5 h of stirring at room temperature a crude product that was purified by flash column chromatography (SiO<sub>2</sub>, 99:1 to 97:3 CH<sub>2</sub>Cl<sub>2</sub>:MeOH), to obtain **7a** as a yellow oil (173 mg, 85%). *R*<sub>f</sub> 0.25 (95:5 CH<sub>2</sub>Cl<sub>2</sub>:MeOH). <sup>1</sup>H NMR (400 MHz, CDCl<sub>3</sub>)  $\delta$  = 8.52 (1H, d, *J* = 2.3, =CH), 8.49 (1H, dd, *J* = 4.8, 1.4, =CH), 7.66 – 7.58 (1H, m, =CH), 7.37 – 7.29 (2H, m, 2 x =CH), 7.24 (1H, ddd, *J* = 7.9, 4.9, 0.7, =CH), 7.15 – 7.07 (3H, m, 3 x =CH), 5.57 (1H, q, *J* = 7.1, NCHCH<sub>3</sub>), 3.25 (3H, s, CH<sub>3</sub>N-C=CH), 2.21 (3H, s, CH<sub>3</sub>NCHCH<sub>3</sub>), 1.45 (3H, d, *J* = 7.1, NCHCH<sub>3</sub>). <sup>13</sup>C NMR (126 MHz, CDCl<sub>3</sub>)  $\delta$  = 162.3 (C=O), 149.0 (=CH), 148.6 (=CH), 147.0 (=C), 136.7 (=C), 135.2 (=CH), 129.7 (=CH), 125.1 (=CH), 124.6 (=CH), 123.4 (=CH), 52.3 (NCHCH<sub>3</sub>), 40.4 (CH<sub>3</sub>NCHCH<sub>3</sub>), 31.1 (CH<sub>3</sub>NC=CH), 15.6 (NCHCH<sub>3</sub>). [ $\alpha$ ]<sub>D</sub><sup>25</sup> = -10 (*c* = 1.00; CH<sub>2</sub>Cl<sub>2</sub>). IR (film, cm<sup>-1</sup>):  $\nu_{\max}$  = 2973, 1637, 1439, 1338, 1119, 760, 698.

**(S)-1-(4-fluorophenyl)-1-methyl-3-(1-(pyridin-3-yl)ethyl)urea (17b)**

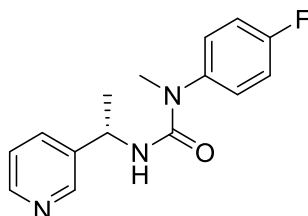

Following General procedure 1, *N*-methyl-*N*-(4-fluorophenyl) carbamoyl chloride (461 mg, 2.456 mmol, 1.2 eq.), 3-pyridine **5a** (**er 98:2**) (250 mg, 2.036 mmol, 1.0 eq.) and Et<sub>3</sub>N (570  $\mu$ L, 4.072 mmol, 2.0 eq.) in acetonitrile (20.0 ml) gave after 20 h heating at reflux a crude product that was purified by flash column chromatography (SiO<sub>2</sub>, 99:1 to 97:3 CH<sub>2</sub>Cl<sub>2</sub>:MeOH) to yield **17b** as a yellow oil (261 mg, 47%). *R*<sub>f</sub> 0.28 (95:5 CH<sub>2</sub>Cl<sub>2</sub>:MeOH). <sup>1</sup>H NMR (400 MHz, CDCl<sub>3</sub>)  $\delta$  = 8.58 – 8.41 (2H, m, 2 x =CH), 7.50 – 7.44 (1H, m, =CH), 7.35 – 7.03 (5H, m, 5 x =CH), 5.01 (1H, quint, *J* = 7.1, NHCHCH<sub>3</sub>), 4.44 (1H, d, *J* = 6.8, NHCHCH<sub>3</sub>), 3.21 (3H, s, NCH<sub>3</sub>), 1.37 (3H, d, *J* = 7.0, NHCHCH<sub>3</sub>). <sup>13</sup>C NMR (101 MHz, CDCl<sub>3</sub>)  $\delta$  = 161.7 (d, <sup>1</sup>*J*<sub>CF</sub> = 248.3 Hz, =CF), 156.4 (C=O), 148.6 (=CH), 147.9 (=CH), 139.9 (=C-CHCH<sub>3</sub>), 139.2 (d, <sup>4</sup>*J*<sub>CF</sub> = 3.4 Hz, N-C=CH), 133.8 (=CH), 129.4 (d, <sup>3</sup>*J*<sub>CF</sub> = 8.7 Hz, =CH), 123.5 (=CH), 117.3 (d, <sup>2</sup>*J*<sub>CF</sub> = 22.6 Hz, =CH), 48.4 (NHCHCH<sub>3</sub>), 37.6 (NCH<sub>3</sub>), 22.5 (NHCHCH<sub>3</sub>). [ $\alpha$ ]<sub>D</sub><sup>25</sup> = +90 (*c* = 1.00; CH<sub>2</sub>Cl<sub>2</sub>). IR (film, cm<sup>-1</sup>):  $\nu_{\max}$  = 3326, 2976, 1649, 1507, 1220, 843. HRMS (ESI<sup>+</sup>): *m/z* calcd for C<sub>15</sub>H<sub>16</sub>N<sub>3</sub>OFNa [M+Na]<sup>+</sup> 296.1170, found 296.1156.

**((S)-1-(4-fluorophenyl)-1,3-dimethyl-3-(1-(pyridin-3-yl)ethyl)urea (7b)**

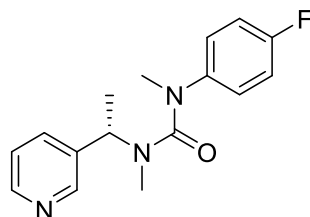

Following general procedure 2B, urea **17b** (223 mg, 0.817 mmol), NaH (49 mg, 1.226 mmol), MeI (61  $\mu$ L, 0.981 mmol) in DMF (12.0 ml) gave after 3 h of stirring at room temperature a crude product that was purified by flash column chromatography (SiO<sub>2</sub>, 99:1 to 97:3 CH<sub>2</sub>Cl<sub>2</sub>:MeOH), to yield **7b** as a yellow oil (186 mg, 79%). *R<sub>f</sub>* 0.29 (95:5 CH<sub>2</sub>Cl<sub>2</sub>:MeOH). <sup>1</sup>H NMR (400 MHz, CDCl<sub>3</sub>)  $\delta$  = 8.59 – 8.42 (1H, m, 2 x =CH), 7.66 – 7.54 (1H, m, =CH), 7.27 – 7.21 (2H, m, 2 x =CH), 7.11 – 6.98 (3H, m, 3 x =CH), 5.55 (1H, q, *J* = 7.1, NCHCH<sub>3</sub>), 3.20 (3H, s, CH<sub>3</sub>NC=CH), 2.22 (3H, s, CH<sub>3</sub>NCHCH<sub>3</sub>), 1.45 (3H, d, *J* = 7.1, NCHCH<sub>3</sub>). <sup>13</sup>C NMR (126 MHz, CDCl<sub>3</sub>)  $\delta$  = 162.3 (C=O), 160.0 (d, <sup>1</sup>*J*<sub>CF</sub> = 245.3 Hz, =CF), 149.0 (=CH), 148.7 (=CH), 143.1 (d, <sup>4</sup>*J*<sub>CF</sub> = 3.4 Hz = 3.0 Hz, N-C=CH), 136.6 (=C-CHCH<sub>3</sub>), 135.1 (=CH), 126.4 (d, <sup>3</sup>*J*<sub>CF</sub> = 8.1 Hz, =CH), 123.4 (=CH), 116.5 (d, <sup>2</sup>*J*<sub>CF</sub> = 22.6 Hz, =CH), 52.4 (NCHCH<sub>3</sub>), 40.8 (CH<sub>3</sub>NCHCH<sub>3</sub>), 31.1 (CH<sub>3</sub>NC=CH), 15.7 (NCHCH<sub>3</sub>). [ $\alpha$ ]<sub>D</sub><sup>25</sup> = -10 (c = 1.00; CH<sub>2</sub>Cl<sub>2</sub>). IR (film, cm<sup>-1</sup>):  $\nu_{\max}$  = 2923, 1639, 1507, 1331, 1218, 1120, 716. HRMS (ESI<sup>+</sup>): *m/z* calcd for C<sub>16</sub>H<sub>19</sub>N<sub>3</sub>OF [M+H]<sup>+</sup> 288.1507, found 288.1494.

**(S)-1-(4-chlorophenyl)-1-methyl-3-(1-(pyridin-3-yl)ethyl)urea (17c)**

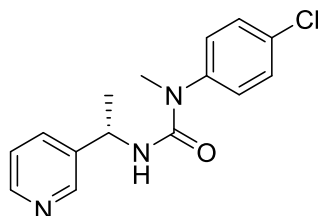

Following general procedure 1, *N*-methyl-*N*-(4-chlorophenyl) carbamoyl chloride (501 mg, 2.456 mmol, 1.2 eq.), 3-pyridine **5a (er 98:2)** (250 mg, 2.036 mmol, 1.0 eq.) and Et<sub>3</sub>N (570  $\mu$ L, 4.072 mmol, 2.0 eq.) in acetonitrile (20.0 ml) gave after 20 h heating at reflux a crude product that was purified by flash column chromatography (SiO<sub>2</sub>, 99:1 to 97:3 CH<sub>2</sub>Cl<sub>2</sub>:MeOH) to yield **17c** as a brown solid (248 mg, 42%). *R<sub>f</sub>* 0.31 (95:5 CH<sub>2</sub>Cl<sub>2</sub>:MeOH). <sup>1</sup>H NMR (400 MHz, CDCl<sub>3</sub>)  $\delta$  = 8.51 (1H, d, *J* = 2.2, =CH), 8.48 (1H, dd, *J* = 4.8, 1.5, =CH), 7.55 (1H, dt, *J* = 7.9, 1.8, =CH), 7.43 – 7.38 (2H, m, 2 x =CH), 7.25 – 7.17 (3H, m, 3 x =CH), 5.02 (1H, quint, *J* = 7.1, NHCHCH<sub>3</sub>), 4.49 (1H, d, *J* = 7.3, NHCHCH<sub>3</sub>), 3.22 (3H, s, NCH<sub>3</sub>), 1.38 (3H, d, *J* = 7.0, NHCHCH<sub>3</sub>). <sup>13</sup>C NMR (126 MHz, CDCl<sub>3</sub>)  $\delta$  = 156.1 (C=O), 148.6 (=CH), 147.9 (=CH), 141.9 (=C), 139.8 (=C), 133.9 (=CH), 133.4 (=C), 130.5 (=CH), 128.8 (=CH), 123.5 (=CH), 48.4 (NHCHCH<sub>3</sub>), 37.4 (NCH<sub>3</sub>), 22.4 (NHCHCH<sub>3</sub>). *Mp* = 110-112 °C. [ $\alpha$ ]<sub>D</sub><sup>25</sup> = +60 (c = 1.00; CH<sub>2</sub>Cl<sub>2</sub>). IR (film, cm<sup>-1</sup>):  $\nu_{\max}$  = 3319, 2975, 1647, 1516, 1492, 1341, 1091, 714. HRMS (ESI<sup>+</sup>): *m/z* calcd for C<sub>15</sub>H<sub>17</sub>N<sub>3</sub>OCl [M+H]<sup>+</sup> 290.1055, found 290.1058.

**(S)-1-(4-chlorophenyl)-1,3-dimethyl-3-(1-(pyridin-3-yl)ethyl)urea (7c)**

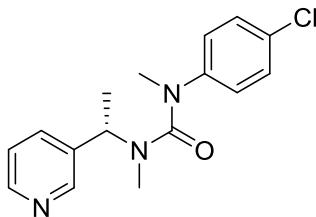

Following general procedure 2B, urea **17c** (248 mg, 0.856 mmol), NaH (51 mg, 1.283 mmol), MeI (64  $\mu$ L, 1.027 mmol) in DMF (15.0 ml) gave after 3 h of stirring at room temperature a crude product that was purified by flash column chromatography ( $\text{SiO}_2$ , 99:1 to 97:3  $\text{CH}_2\text{Cl}_2$ :MeOH), to yield **7c** as a yellow oil (215 mg, 83%).  $R_f$  0.22 (95:5  $\text{CH}_2\text{Cl}_2$ :MeOH).  $^1\text{H NMR}$  (500 MHz,  $\text{CDCl}_3$ )  $\delta$  = 8.54 (1H, d,  $J$  = 1.5 Hz, =CH), 8.50 (1H, d,  $J$  = 3.8 Hz, =CH), 7.61 (1H, d,  $J$  = 7.9 Hz, =CH), 7.31 – 7.22 (4H, m, 4 x =CH), 7.04 – 6.99 (2H, m, 2 x =CH), 5.56 (1H, q,  $J$  = 7.1, NCHCH<sub>3</sub>), 3.21 (3H, s, CH<sub>3</sub>NC=CH), 2.24 (3H, s, CH<sub>3</sub>NCHCH<sub>3</sub>), 1.46 (3H, d,  $J$  = 7.1, NCHCH<sub>3</sub>).  $^{13}\text{C NMR}$  (126 MHz,  $\text{CDCl}_3$ )  $\delta$  = 161.9 (C=O), 149.0 (=CH), 148.8 (=CH), 145.4 (=C), 136.5 (=C), 135.1 (=CH), 130.3 (=C), 129.8 (=CH), 125.6 (=CH), 123.4 (=CH), 52.3 (NCHCH<sub>3</sub>), 40.2 (CH<sub>3</sub>NCHCH<sub>3</sub>), 31.2 (CH<sub>3</sub>NC=CH), 15.6 (NCHCH<sub>3</sub>).  $\text{Mp}$  = 77-78 °C.  $[\alpha]_D^{25}$  = -10 ( $c$  = 1.00;  $\text{CH}_2\text{Cl}_2$ ). IR (film,  $\text{cm}^{-1}$ ):  $\nu_{\text{max}}$  = 2974, 1642, 1492, 1330, 1120, 834, 715. HRMS (ESI<sup>+</sup>):  $m/z$  calcd for  $\text{C}_{16}\text{H}_{19}\text{N}_3\text{OCl}$  [M+H]<sup>+</sup> 304.1211, found 304.1214.

**(S)-1-methyl-1-(pyridin-2-yl)-3-(1-(pyridin-3-yl)ethyl)urea (17d)**

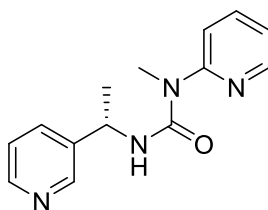

Following general procedure 1, *N*-methyl-*N*-(3-pyridyl) carbamoyl chloride (419 mg, 2.456 mmol, 1.2 eq.), 3-pyridine **5a (er 98:2)** (250 mg, 2.036 mmol, 1.0 eq.) and Et<sub>3</sub>N (570  $\mu$ L, 4.072 mmol, 2.0 eq.) in acetonitrile (20.0 ml) gave after 2 h heating at reflux a crude product that was purified by flash column chromatography ( $\text{SiO}_2$ , 99:1 to 97:3  $\text{CH}_2\text{Cl}_2$ :MeOH) to yield **17d** as a brown oil (203 mg, 39%).  $R_f$  0.24 (95:5  $\text{CH}_2\text{Cl}_2$ :MeOH).  $^1\text{H NMR}$  (400 MHz,  $\text{CDCl}_3$ )  $\delta$  = 10.89 (1H, d,  $J$  = 6.7, NHCHCH<sub>3</sub>), 8.65 (1H, d,  $J$  = 2.2, =CH), 8.48 (1H, dd,  $J$  = 4.8, 1.5, =CH), 8.31 – 8.24 (1H, m, =CH), 7.75 – 7.65 (2H, m, 2 x =CH), 7.26 – 7.22 (1H, m, =CH), 7.01 – 6.95 (2H, m, 2 x =CH), 5.13 (1H, quint,  $J$  = 7.0, NCHCH<sub>3</sub>), 3.38 (3H, s,  $J$  = 8.4, NCH<sub>3</sub>), 1.57 (3H, d,  $J$  = 7.0, NHCHCH<sub>3</sub>).  $^{13}\text{C NMR}$  (126 MHz,  $\text{CDCl}_3$ )  $\delta$  = 156.2 (C=O), 155.9 (=C), 148.4 (=CH), 148.2 (=CH), 140.4 (=C), 138.9 (=CH), 133.9 (=CH), 123.5 (=CH), 117.1 (=CH), 111.6 (=CH), 48.6 (NHCHCH<sub>3</sub>), 32.9 (NCH<sub>3</sub>), 23.2 (NHCHCH<sub>3</sub>).  $[\alpha]_D^{25}$  = +110 ( $c$  = 1.00;  $\text{CH}_2\text{Cl}_2$ ). IR (film,  $\text{cm}^{-1}$ ):  $\nu_{\text{max}}$  = 3172, 2972, 1666, 1529, 1435, 1317, 777. HRMS (ESI<sup>+</sup>):  $m/z$  calcd for  $\text{C}_{14}\text{H}_{17}\text{N}_4\text{O}$  [M+H]<sup>+</sup> 257.1397, found 257.1400.

**(S)-1,3-dimethyl-3-(pyridin-2-yl)-1-(1-(pyridin-3-yl)ethyl)urea (7d)**

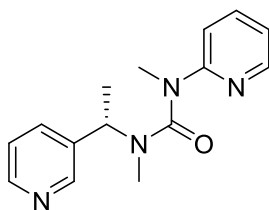

Following general procedure 2B, urea **17d** (248 mg, 0.856 mmol), NaH (51 mg, 1.283 mmol), MeI (64  $\mu$ L, 1.027 mmol) in DMF (15.0 ml) gave after 3 h of stirring at room temperature a crude product that was purified by flash column chromatography ( $\text{SiO}_2$ , 99:1 to 97:3  $\text{CH}_2\text{Cl}_2$ :MeOH), to yield **7d** as a yellow oil (215 mg, 74%).  $R_f$  0.28 (95:5  $\text{CH}_2\text{Cl}_2$ :MeOH).  $^1\text{H NMR}$  (500 MHz,  $\text{CDCl}_3$ )  $\delta$  = 8.64 (1H, s, =CH), 8.52 (1H, d,  $J$  = 4.2, =CH), 8.32 (1H, dd,  $J$  = 4.8, 1.3, =CH), 7.74 (1H, d,  $J$  = 7.9, =CH), 7.61 – 7.53 (1H, m, =CH), 7.33 – 7.22 (1H, m, =CH), 6.94 – 6.84 (2H, m, =CH), 5.69 (1H, q,  $J$  = 7.1,  $\text{NCHCH}_3$ ), 3.33 (3H, s,  $\text{CH}_3\text{NC=CH}$ ), 2.42 (3H, s,  $\text{CH}_3\text{NCHCH}_3$ ), 1.59 (3H, d,  $J$  = 7.1,  $\text{NCHCH}_3$ ).  $^{13}\text{C NMR}$  (126 MHz,  $\text{CDCl}_3$ )  $\delta$  161.3 (C=O), 157.5 (=C), 149.1 (=CH), 148.8 (=CH), 148.6 (=CH), 137.9 (=CH), 136.2 (=C), 135.3 (=CH), 123.5 (=CH), 117.8 (=CH), 114.3 (=CH), 52.3 ( $\text{NCHCH}_3$ ), 36.5 ( $\text{CH}_3\text{NCHCH}_3$ ), 30.7 ( $\text{CH}_3\text{NC=CH}$ ), 15.7 ( $\text{NCHCH}_3$ ).  $[\alpha]_D^{25}$  = +10 ( $c$  = 1.00;  $\text{CH}_2\text{Cl}_2$ ). IR (film,  $\text{cm}^{-1}$ ):  $\nu_{\text{max}}$  = 2978, 1651, 1589, 1477, 1428, 1332, 1104, 775. HRMS (ESI $^+$ ):  $m/z$  calcd for  $\text{C}_{15}\text{H}_{18}\text{N}_4\text{ONa}$   $[\text{M}+\text{Na}]^+$  293.1373, found 293.1365.

**(R)-1-methyl-1-phenyl-3-(2-phenyl-1-(pyridin-3-yl)ethyl)urea (17e)**

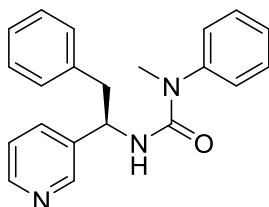

Following general procedure 1, *N*-methyl-*N*-phenyl carbamoyl chloride (0.308 g, 1.816 mmol, 1.2 eq.), 3-pyridine **5b** (300 mg, 1.513 mmol, 1.0 eq.) and  $\text{Et}_3\text{N}$  (422  $\mu$ L, 3.026 mmol, 2.0 eq.) in acetonitrile (15.0 ml) gave, after 20 h heating at reflux, a crude product that was purified by flash column chromatography ( $\text{SiO}_2$ , 99:1 to 97:3  $\text{CH}_2\text{Cl}_2$ :MeOH) to yield **17e** as a brown oil (261 mg, 52%).  $R_f$  0.18 (95:5  $\text{CH}_2\text{Cl}_2$ :MeOH).  $^1\text{H NMR}$  (400 MHz,  $\text{CDCl}_3$ )  $\delta$  = 8.46 (1H, dd,  $J$  = 4.8, 1.6, =CH), 8.41 (1H, d,  $J$  = 2.2, =CH), 7.47 – 7.29 (4H, m, 4 x =CH), 7.23 – 7.14 (4H, m, 4 x =CH), 7.09 – 7.03 (2H, m, 2 x =CH), 6.88 – 6.80 (2H, m, 2 x =CH), 5.12 (1H, dd,  $J$  = 14.6, 6.5,  $\text{NHCHCH}_2$ ), 4.65 (1H, d,  $J$  = 6.8,  $\text{NHCHCH}_2$ ), 3.17 (3H, s,  $\text{N-CH}_3$ ), 3.00 (1H, dd,  $J$  = 13.8, 6.0,  $\text{NHCHCH}_2$ ), 2.80 (1H, dd,  $J$  = 13.8, 8.2,  $\text{NHCHCH}_2$ );  $^{13}\text{C NMR}$  (100 MHz,  $\text{CDCl}_3$ )  $\delta$  = 156.4 (C=O), 148.4 (=CH), 148.1 (=CH), 143.0 (=C), 138.6 (=C), 136.6 (=C), 134.3 (=CH), 130.3 (=CH), 129.3 (=CH), 128.7 (=CH), 127.7 (=CH), 127.5 (=CH), 126.9 (=CH), 123.3 (=CH), 53.8 ( $\text{NHCHCH}_2$ ), 43.0 ( $\text{NHCHCH}_2$ ), 37.1 ( $\text{NCH}_3$ ).  $[\alpha]_D^{25}$  = -10 ( $c$  = 1.00;  $\text{CH}_2\text{Cl}_2$ ). IR (film,  $\text{cm}^{-1}$ ):  $\nu_{\text{max}}$  = 3337, 3028, 2926, 1656, 1495. HRMS (ESI $^+$ ):  $m/z$  calcd for  $\text{C}_{21}\text{H}_{21}\text{N}_3\text{ONa}$   $[\text{M}+\text{Na}]^+$  354.1577, found 354.1561.

**(R)-1,3-dimethyl-3-phenyl-1-(2-phenyl-1-(pyridin-3-yl)ethyl)urea (7e)**

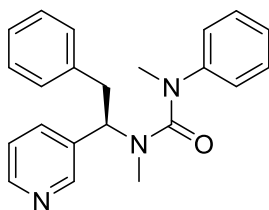

Following general procedure 2B, urea **17e** (224 mg, 0.677 mmol), NaH (41 mg, 1.016 mmol), MeI (51  $\mu$ L, 0.813 mmol) in DMF (6.8 ml) gave after 2 h of stirring at room temperature a crude product that was purified by flash column chromatography (SiO<sub>2</sub>, 99:1 to 97:3 CH<sub>2</sub>Cl<sub>2</sub>:MeOH), to obtain **7e** as an orange oil (211 mg, 90%). *R<sub>f</sub>* 0.18 (95:5 CH<sub>2</sub>Cl<sub>2</sub>:MeOH). <sup>1</sup>H NMR (400 MHz, CDCl<sub>3</sub>)  $\delta$  = 8.66 (1H, d, *J* = 2.2, =CH), 8.51 (1H, dt, *J* = 18.8, 9.4, =CH), 7.80 (1H, dt, *J* = 7.9, 1.7, =CH), 7.44 – 7.23 (6H, m, 6 x =CH), 7.10 – 6.95 (3H, m, 3 x =CH), 6.48 – 6.40 (2H, m, 2 x =CH), 6.02 (1H, dd, *J* = 11.4, 5.5, NCHCH<sub>2</sub>), 3.34 (1H, dd, *J* = 14.4, 5.5 Hz, NCHCH<sub>A</sub>H<sub>B</sub>), 3.12 (3H, s, =CH-NCH<sub>3</sub>), 3.09 (1H, dd, *J* = 14.4, 11.4, NCHCH<sub>A</sub>H<sub>B</sub>), 2.23 (3H, s, CH<sub>2</sub>CHNCH<sub>3</sub>). <sup>13</sup>C NMR (100 MHz, CDCl<sub>3</sub>)  $\delta$  = 162.1 (C=O), 149.2 (=CH), 148.9 (=CH), 146.5 (=C), 137.9 (=C), 135.9 (2 peaks, =CH, =C), 129.6 (=CH), 129.1 (=CH), 129.0 (=CH), 126.9 (=CH), 124.5 (=CH), 124.3 (=CH), 123.5 (=CH), 57.1 (NCHCH<sub>2</sub>), 40.5 (=CH-NCH<sub>3</sub>), 36.6 (NCHCH<sub>2</sub>), 31.6 (CH<sub>2</sub>CHNCH<sub>3</sub>).  $[\alpha]_D^{25}$  = +95 (*c* = 1.00; CH<sub>2</sub>Cl<sub>2</sub>). IR (film, cm<sup>-1</sup>):  $\nu_{\max}$  = 3029, 2931, 1634, 1494, 1342, 1118. HRMS (ESI<sup>+</sup>): *m/z* calcd for C<sub>22</sub>H<sub>24</sub>N<sub>3</sub>O [M+H]<sup>+</sup> 346.1914, found 346.1900.

**(R)-1-(3-chlorophenyl)-1-methyl-3-(2-phenyl-1-(pyridin-3-yl)ethyl)urea (17f)**

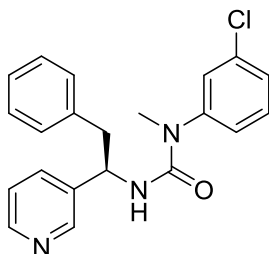

Following general procedure 1, *N*-methyl-*N*-(3-chlorophenyl) carbamoyl chloride (0.371 g, 1.816 mmol, 1.2 eq.), 3-pyridine **5b** (300 mg, 1.513 mmol, 1.0 eq.) and Et<sub>3</sub>N (420  $\mu$ L, 3.026 mmol, 2.0 eq.) in acetonitrile (11.0 ml) gave, after 2 h heating at reflux, a crude product that was purified by flash column chromatography (SiO<sub>2</sub>, 97:3 to 95:5 CH<sub>2</sub>Cl<sub>2</sub>:MeOH) to yield **17f** as a brown oil (474 mg, 86%). *R<sub>f</sub>* 0.23 (95:5 CH<sub>2</sub>Cl<sub>2</sub>:MeOH). <sup>1</sup>H NMR (400 MHz, CDCl<sub>3</sub>)  $\delta$  = 8.41 (1H, dd, *J* = 4.8, 1.6, =CH), 8.37 (1H, d, *J* = 2.3, =CH), 7.41 – 7.35 (1H, m, =CH), 7.26 – 7.22 (2H, m, 2 x =CH), 7.18 – 7.10 (4H, m, 4 x =CH), 7.05 (1H, dt, *J* = 2.0, 0.9, =CH), 6.89 – 6.85 (1H, m, =CH), 6.85 – 6.78 (2H, m, 2 x =CH), 5.06 (1H, dt, *J* = 8.2, 6.4, NHCHCH<sub>2</sub>), 4.56 (1H, d, *J* = 6.7, NHCHCH<sub>2</sub>), 3.09 (3H, s, NCH<sub>3</sub>), 2.99 (1H, dd, *J* = 13.9, 5.9, NHCHCH<sub>A</sub>H<sub>B</sub>), 2.76 (1H, dd, *J* = 13.9, 8.4, NHCHCH<sub>A</sub>H<sub>B</sub>). <sup>13</sup>C NMR (100 MHz, CDCl<sub>3</sub>)  $\delta$  = 155.9 (C=O), 148.6 (=CH), 148.1 (=CH), 144.3 (=C), 138.4 (=C), 136.5 (=C), 135.6 (=C), 134.3 (=CH), 131.2 (=CH), 129.3 (=CH), 128.8 (=CH), 127.9 (=CH), 127.8 (=CH), 127.1 (=CH), 125.6 (=CH), 123.4 (=CH), 53.9 (NHCHCH<sub>2</sub>), 42.9 (NHCHCH<sub>2</sub>), 37.2 (NCH<sub>3</sub>).  $[\alpha]_D^{25}$  = -10 (*c* = 1.00;

CH<sub>2</sub>Cl<sub>2</sub>). IR (film, cm<sup>-1</sup>):  $\nu_{\max}$  = 3310, 3028, 1656, 1591, 1509, 1337. HRMS (ESI<sup>+</sup>):  $m/z$  calcd for C<sub>21</sub>H<sub>21</sub>N<sub>3</sub>OCl [M+H]<sup>+</sup> 366.1368, found 366.1354.

**(R)-1-(3-chlorophenyl)-1,3-dimethyl-3-(2-phenyl-1-(pyridin-3-yl)ethyl)urea (7f)**

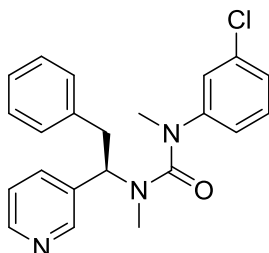

Following general procedure 2B, urea **17f** (282 mg, 0.772 mmol), NaH (51 mg, 1.278 mmol), MeI (64  $\mu$ L, 1.02 mmol) in DMF (8.5 ml) gave after 2 h of stirring at room temperature a crude product that was purified by flash column chromatography (SiO<sub>2</sub>, 99:1 to 97:3 CH<sub>2</sub>Cl<sub>2</sub>:MeOH), to obtain **7f** as a yellow oil (282 mg, 96%).  $R_f$  0.18 (95:5 CH<sub>2</sub>Cl<sub>2</sub>:MeOH). <sup>1</sup>H NMR (400 MHz, CDCl<sub>3</sub>)  $\delta$  = 8.61 (1H, d,  $J$  = 1.5, =CH), 8.47 (1H, d,  $J$  = 3.6 Hz, =CH), 7.75 – 7.69 (1H, m, =CH), 7.35 – 7.17 (6H, m, =CH), 6.93 – 6.75 (3H, m, =CH), 5.96 – 5.88 (2H, m, =CH and NCHCH<sub>2</sub>), 3.28 (1H, dd,  $J$  = 14.5, 5.7, NCHCH<sub>A</sub>H<sub>B</sub>), 3.12 – 3.04 (1H, m, NCHCH<sub>A</sub>H<sub>B</sub>), 3.02 (3H, s, =CH-NCH<sub>3</sub>), 2.23 (3H, s, CH<sub>2</sub>CHNCH<sub>3</sub>). <sup>13</sup>C NMR (100 MHz, CDCl<sub>3</sub>)  $\delta$  = 161.6 (C=O), 149.2 (=CH), 149.1 (=CH), 147.6 (s), 137.7 (=C), 135.9 (=CH), 135.5 (=C), 134.8 (=C), 130.6 (=CH), 129.0 (2 x =CH), 127.0 (=CH), 124.5 (=CH), 123.8 (=CH), 123.6 (=CH), 121.8 (=CH), 57.4 (NCHCH<sub>2</sub>), 40.0 (=CH-NCH<sub>3</sub>), 36.5 (NCHCH<sub>2</sub>), 31.8 (CH<sub>2</sub>CHNCH<sub>3</sub>). [ $\alpha$ ]<sub>D</sub><sup>25</sup> = +110 ( $c$  = 1.00; CH<sub>2</sub>Cl<sub>2</sub>). IR (film, cm<sup>-1</sup>):  $\nu_{\max}$  = 3028, 2925, 1640, 1591, 1478, 1330, 1099. HRMS (ESI<sup>+</sup>):  $m/z$  calcd for C<sub>22</sub>H<sub>23</sub>N<sub>3</sub>OCl [M+H]<sup>+</sup> 380.1524, found 380.1511.

**(R)-1-(3-methoxyphenyl)-1-methyl-3-(2-phenyl-1-(pyridin-3-yl)ethyl)urea (17g)**

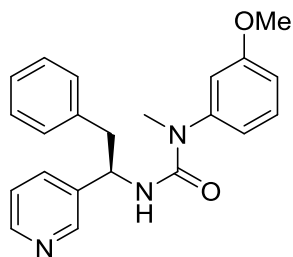

Following general procedure 1, *N*-methyl-*N*-(3-methoxyphenyl) carbamoyl chloride (0.302 g, 1.513 mmol, 1.2 eq.), 3-pyridine **5b** (250 mg, 1.261 mmol, 1.0 eq.) and Et<sub>3</sub>N (350  $\mu$ L, 2.522 mmol, 2.0 eq.) in acetonitrile (13.0 ml) gave, after 2 h heating at reflux, a crude product that was purified by flash column chromatography (SiO<sub>2</sub>, 99:1 to 97:3 CH<sub>2</sub>Cl<sub>2</sub>:MeOH) to yield **17g** as a brown oil (313 mg, 69%).  $R_f$  0.17 (95:5 CH<sub>2</sub>Cl<sub>2</sub>:MeOH). <sup>1</sup>H NMR (400 MHz, CDCl<sub>3</sub>)  $\delta$  = 8.46 (1H, dd,  $J$  = 4.8, 1.5, =CH), 8.41 (1H, d,  $J$  = 2.1, =CH), 7.42 (1H, dt,  $J$  = 7.8, 1.8, =CH), 7.33 – 7.24 (2H, m, 2 x =CH), 7.22 – 7.13 (3H, m, 3 x =CH), 6.91 – 6.81 (3H, m, 3 x =CH), 6.67 – 6.60 (2H, m, 2 x =CH), 5.11 (1H, dd,  $J$  = 6.8, 6.6, NHCHCH<sub>2</sub>), 4.75 (1H, d,  $J$  = 6.8, NHCHCH<sub>2</sub>), 3.79 (3H, s, OCH<sub>3</sub>), 3.16 (3H, s, N-CH<sub>3</sub>), 3.00 (1H, dd,  $J$  = 13.8, 6.1, NHCHCH<sub>A</sub>H<sub>B</sub>), 2.82 (1H, dd,  $J$  = 13.8, 8.1,

NHCHCH<sub>A</sub>H<sub>B</sub>). <sup>13</sup>C NMR (100 MHz, CDCl<sub>3</sub>)  $\delta$  = 161.0 (C=O), 156.3 (=C-OCH<sub>3</sub>), 148.5 (=CH), 148.2 (=CH), 144.2 (=C), 138.6 (=C), 136.6 (=C), 134.3 (=CH), 131.0 (=CH), 129.3 (=CH), 128.7 (=CH), 126.9 (=CH), 123.4 (=CH), 119.5 (=CH), 113.5 (=CH), 113.0 (=CH), 55.5 (OCH<sub>3</sub>), 53.8 (NHCHCH<sub>2</sub>), 43.0 (NHCHCH<sub>2</sub>), 37.1 (NCH<sub>3</sub>). IR (film, cm<sup>-1</sup>):  $\nu_{\max}$  = 3322, 3028, 2935, 1659, 1598, 1489. HRMS (ESI<sup>+</sup>):  $m/z$  calcd for C<sub>22</sub>H<sub>24</sub>N<sub>3</sub>O<sub>2</sub> [M+H]<sup>+</sup> 362.1863, found 362.1848.

**(R)-1-(3-methoxyphenyl)-1,3-dimethyl-3-(2-phenyl-1-(pyridin-3-yl)ethyl)urea (7g)**

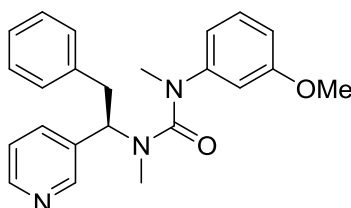

Following general procedure 2B, urea **17g** (236 mg, 0.653 mmol), NaH (39 mg, 0.979 mmol), MeI (49  $\mu$ L, 0.784 mmol) in DMF (7.0 ml) gave after 2 h of stirring at room temperature a crude product that was purified by flash column chromatography (SiO<sub>2</sub>, 99:1 to 97:3 CH<sub>2</sub>Cl<sub>2</sub>:MeOH), to obtain **7g** as a yellow oil (86mg, 35%).  $R_f$  0.27 (95:5 CH<sub>2</sub>Cl<sub>2</sub>:MeOH). <sup>1</sup>H NMR (500 MHz, CDCl<sub>3</sub>)  $\delta$  = 8.63 (1H, br s, =CH), 8.50 (1H, d,  $J$  = 4.1, =CH), 7.75 (1H, d,  $J$  = 7.9, =CH), 7.34 (2H, t,  $J$  = 7.4, 2 x =CH), 7.30 – 7.22 (3H, m, 3 x =CH), 6.91 (1H, t,  $J$  = 8.1, =CH), 6.60 – 6.53 (1H, m, =CH), 6.45 (1H, t,  $J$  = 2.2, =CH), 5.94 (1H, dd,  $J$  = 10.3, 6.2, =CH), 5.86 (1H, d,  $J$  = 7.9, =CH), 3.70 (3H, s, OCH<sub>3</sub>), 3.32 (1H, dd,  $J$  = 14.4, 6.2, NCHCH<sub>A</sub>H<sub>B</sub>), 3.17 – 3.12 (1H, m, NCHCH<sub>A</sub>H<sub>B</sub>), 3.10 (3H, s, CH<sub>2</sub>CHNCH<sub>3</sub>), 2.32 (3H, s, =CH-NCH<sub>3</sub>). <sup>13</sup>C NMR (126 MHz, CDCl<sub>3</sub>)  $\delta$  = 161.9 (C=O), 160.5 (=C), 149.3 (=CH), 148.9 (=CH), 147.7 (=C), 137.8 (=C), 135.9 (=CH), 135.6 (=C), 130.3 (=CH), 129.0 (=CH), 128.9 (=CH), 126.8 (=CH), 123.5 (=CH), 116.6 (=CH), 110.3 (=CH), 109.8 (=CH), 57.5 (NCHCH<sub>2</sub>), 55.3 (OCH<sub>3</sub>), 40.3 (=CH-NCH<sub>3</sub>), 36.6 (NCHCH<sub>2</sub>), 31.6 (CH<sub>2</sub>CHNCH<sub>3</sub>). [ $\alpha$ ]<sub>D</sub><sup>25</sup> = +65 ( $c$  = 1.00; CH<sub>2</sub>Cl<sub>2</sub>). IR (film, cm<sup>-1</sup>):  $\nu_{\max}$  = 2938, 1637, 1594, 1487, 1328, 1111, 1042, 699. HRMS (ESI<sup>+</sup>):  $m/z$  calcd for C<sub>23</sub>H<sub>26</sub>N<sub>3</sub>O<sub>2</sub> [M+H]<sup>+</sup> 376.2020, found 376.2025.

**(R)-1-methyl-3-(2-phenyl-1-(pyridin-3-yl)ethyl)-1-(pyridin-2-yl)urea (17h)**

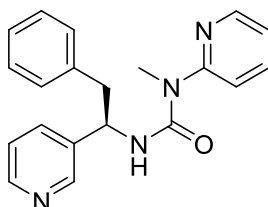

Following general procedure 1, *N*-methyl-*N*-(3-pyridyl) carbamoyl chloride (310 mg, 1.816 mmol, 1.2 eq.), 3-pyridine **5b** (300 mg, 1.513 mmol, 1.0 eq.) and Et<sub>3</sub>N (420  $\mu$ L, 3.026 mmol, 2.0 eq.) in acetonitrile (15.0 ml) gave after 2 h heating at reflux a crude product that was purified by flash column chromatography (SiO<sub>2</sub>, 97:3 CH<sub>2</sub>Cl<sub>2</sub>:MeOH) to yield **17h** as a brown oil (450 mg, 90%).  $R_f$  0.15 (95:5 CH<sub>2</sub>Cl<sub>2</sub>:MeOH). <sup>1</sup>H NMR (400 MHz, CDCl<sub>3</sub>)  $\delta$  = 11.10 (1H, d,  $J$  = 7.0 Hz, NHCHCH<sub>2</sub>), 8.51 (1H, d,  $J$  = 2.2 Hz, =CH), 8.46 (1H, dd,  $J$  = 4.8, 1.6 Hz,

=CH), 8.19 (1H, ddd,  $J = 5.0, 2.0, 0.8$  Hz, =CH), 7.70 (1H, ddd,  $J = 8.6, 7.4, 2.0$  Hz, =CH), 7.48 (1H, dt,  $J = 7.9, 1.8$  Hz, =CH), 7.28 – 7.15 (4H, m, 4 x =CH), 7.08 – 7.03 (2H, m, 2 x =CH), 6.99 – 6.93 (2H, m, 2 x =CH), 5.32 (1H, q,  $J = 6.8$  Hz, NHCHCH<sub>2</sub>), 3.33 (3H, s, N-CH<sub>3</sub>), 3.18 – 3.13 (2H, m, NHCHCH<sub>2</sub>). <sup>13</sup>C NMR (101 MHz, CDCl<sub>3</sub>)  $\delta = 156.0$  (C=O and N=C-N), 148.6 (=CH), 148.4 (=CH), 145.7 (=CH), 138.9 (=CH), 138.5 (=C), 137.1 (=C), 134.5 (=CH), 129.9 (=CH), 128.4 (=CH), 126.8 (=CH), 123.2 (=CH), 117.1 (=CH), 111.5 (=CH), 54.7 (NHCHCH<sub>2</sub>), 43.6 (NHCHCH<sub>2</sub>), 32.7 (NCH<sub>3</sub>).  $[\alpha]_D^{25} = -5$  ( $c = 1.00$ ; CH<sub>2</sub>Cl<sub>2</sub>). **Mp** = 85–86 °C. **IR** (film, cm<sup>-1</sup>):  $\nu_{\max} = 3028, 1665, 1521, 1434, 1316$ . **HRMS** (ESI<sup>+</sup>):  $m/z$  calcd for C<sub>20</sub>H<sub>21</sub>N<sub>4</sub>O [M+H]<sup>+</sup> 333.1710, found 333.1705.

**(R)-1,3-dimethyl-1-(2-phenyl-1-(pyridin-3-yl)ethyl)-3-(pyridin-2-yl)urea (7h)**

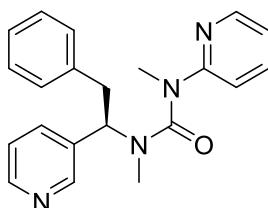

Following general procedure 2B, urea **17h** (330 mg, 0.993 mmol), NaH (60 mg, 1.490 mmol), MeI (74  $\mu$ L, 1.192 mmol) in DMF (10.0 ml) gave after 2.5 h of stirring at room temperature a crude product that was purified by flash column chromatography (SiO<sub>2</sub>, 97:3 CH<sub>2</sub>Cl<sub>2</sub>:MeOH), to obtain **7h** as a yellow oil (286 mg, 83%). **R<sub>f</sub>** 0.21 (95:5 CH<sub>2</sub>Cl<sub>2</sub>:MeOH). <sup>1</sup>H NMR (400 MHz, CDCl<sub>3</sub>)  $\delta = 8.75$  (1H, d,  $J = 2.0$ , =CH), 8.56 (1H, dd,  $J = 4.7, 1.3$ , =CH), 8.24 (1H, ddd,  $J = 5.0, 2.0, 0.8$  Hz, =CH), 7.87 (1H, dt,  $J = 7.9, 1.7$  Hz, =CH), 7.45 – 7.28 (6H, m, 6 x =CH), 7.21 (1H, ddd,  $J = 8.3, 7.3, 2.0$ , =CH), 6.78 (1H, ddd,  $J = 7.3, 4.9, 0.9$ , =CH), 6.06 (1H, dd,  $J = 11.4, 5.6$ , NCHCH<sub>2</sub>), 5.89 (1H, d,  $J = 8.3$ , =CH), 3.43 (1H, dd,  $J = 14.5, 5.6$ , NCHCH<sub>A</sub>H<sub>B</sub>), 3.23 (1H, dd,  $J = 14.5, 11.5$ , NCHCH<sub>A</sub>H<sub>B</sub>), 3.14 (3H, s, CH<sub>2</sub>CHNCH<sub>3</sub>), 2.45 (3H, s, =CH-NCH<sub>3</sub>). <sup>13</sup>C NMR (101 MHz, CDCl<sub>3</sub>)  $\delta = 161.5$  (C=O), 157.1 (=C), 149.2 (2 x =CH), 148.4 (=CH), 137.9 (=CH), 137.7 (=C), 135.9 (=CH), 135.3 (=C), 129.1 (2 x =CH), 123.6 (=CH), 117.5 (=CH), 114.8 (=CH), 57.2 (NCHCH<sub>2</sub>), 36.6 (NCHCH<sub>2</sub>), 36.1 (=CH-NCH<sub>3</sub>), 31.4 (CH<sub>2</sub>CHNCH<sub>3</sub>).  $[\alpha]_D^{25} = +90$  ( $c = 1.00$ ; CH<sub>2</sub>Cl<sub>2</sub>). **HRMS** (ESI<sup>+</sup>):  $m/z$  calcd for C<sub>21</sub>H<sub>23</sub>N<sub>4</sub>O [M+H]<sup>+</sup> 347.1866, found 347.1851.

**1-(3-Chlorophenyl)-1-methyl-3-[(1S)-1-phenylethyl]urea (18a)**

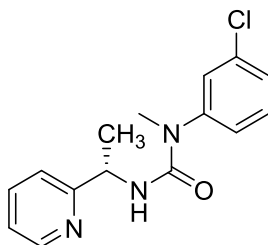

Following general procedure 1, *N*-methyl-*N*-(3-chlorophenyl) carbamoyl chloride (1.40 g), 2-pyridine **6a** (835 mg, 6.87 mmol), synthesized from **4**, Et<sub>3</sub>N (1.05 ml) and DMAP (cat) in dichloroethane (17.20 ml) gave, after 20 h heating at reflux, a crude product that was purified by flash column chromatography (SiO<sub>2</sub>, 99:1 to 90:10 DCM:MeOH) to yield the title compound as an oil (1.28 g, 64%). <sup>1</sup>H NMR (400 MHz, CDCl<sub>3</sub>)  $\delta =$

8.50-8.38 (1H, m, =CH), 7.64 (1H, td,  $J = 7.7$  and  $1.4$ , =CH), 7.35 (1H, t,  $J = 7.9$ , =CH), 7.30-7.21 (3H, m, 3 x =CH), 7.20-7.09 (2H, m, 2 x =CH), 5.97-5.79 (1H, brd, CHNH), 5.05 (1H, q,  $J = 6.9$ , NHCHCH<sub>3</sub>), 3.27 (3H, s, NCH<sub>3</sub>), 1.41 (3H, d,  $J = 6.8$ , CHCH<sub>3</sub>). <sup>13</sup>C NMR (100 MHz, CDCl<sub>3</sub>)  $\delta = 161.8$  (C=O), 156.3 (=C), 148.9 (=CH), 144.9 (=C), 137.0 (=CH), 135.2 (=C), 130.8 (=CH), 127.3 (=CH), 127.1 (=CH), 125.2 (=CH), 122.3 (=CH), 121.5 (=CH), 51.2 (NCH), 37.2 (NCH<sub>3</sub>), 23.1 (CH<sub>3</sub>).  $[\alpha]_D^{20} = -137$  ( $c = 1.00$ ; CHCl<sub>3</sub>). IR (film, cm<sup>-1</sup>):  $\nu_{\max} = 3320, 2971, 2928, 1642$ . HRMS (ESI<sup>+</sup>):  $m/z$  calcd for C<sub>15</sub>H<sub>16</sub>ClN<sub>3</sub>ONa [M+Na]<sup>+</sup> 312.0880, found 312.0871.

### 1-(3-Chlorophenyl)-1,3-dimethyl-3-[(1S)-1-phenylethyl]urea (**8a**)

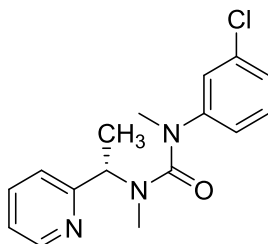

Following general procedure 2A, urea **18a** (689 mg, 2.38 mmol), MeI (0.18 ml), NaH (124 mg) in THF (5.95 ml) gave, after purification by flash column chromatography (SiO<sub>2</sub>, 80:20 to 0:100 Pet.Ether:EtOAc), **8a** as an oil (720 mg, 99%). <sup>1</sup>H NMR (400 MHz, CDCl<sub>3</sub>)  $\delta = 8.61$ -8.52 (1H, m, =CH), 7.65 (1H, td,  $J = 7.7$  and  $1.7$ , =CH), 7.32 (1H, d,  $J = 7.9$ , =CH), 7.21 (1H, t,  $J = 8.1$ , =CH), 7.18-7.10 (2H, m, 2 x =CH), 7.06-7.01 (1H, m, =CH), 7.00-6.95 (1H, m, =CH), 5.25 (1H, q,  $J = 7.1$ , NCHCH<sub>3</sub>), 3.23 (3H, s, NCH<sub>3</sub>), 2.38 (3H, s, NCH<sub>3</sub>), 1.52 (3H, d,  $J = 7.1$ , CHCH<sub>3</sub>). <sup>13</sup>C NMR (100 MHz, CDCl<sub>3</sub>)  $\delta = 161.6$  (C=O), 160.2 (=C), 149.0 (=CH), 147.9 (=C), 136.7 (=CH), 134.9 (=C), 130.4 (=CH), 124.3 (=CH), 123.8 (=CH), 122.5 (=CH), 122.3 (=CH), 121.6 (=CH), 56.0 (NCH), 39.7 (NCH<sub>3</sub>), 31.6 (NCH<sub>3</sub>), 15.5 (CH<sub>3</sub>).  $[\alpha]_D^{20} = -237$  ( $c = 1.00$ ; CHCl<sub>3</sub>). IR (film, cm<sup>-1</sup>):  $\nu_{\max} = 2992, 2945, 1639$ . HRMS (ESI<sup>+</sup>):  $m/z$  calcd for C<sub>16</sub>H<sub>18</sub>ClN<sub>3</sub>ONa [M+H]<sup>+</sup> 326.1036, found 326.1048.

### 1,3-dimethyl-1-phenyl-3-[(1S)-1-(pyridin-2-yl)propyl]urea (**18b**)

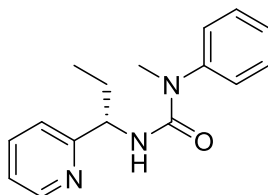

Following general procedure 1, *N*-methyl-*N*-phenyl carbamoyl chloride (477 mg), 2-pyridine **6b** (383 mg, 2.81 mmol), synthesized from **4**, and Et<sub>3</sub>N (431  $\mu$ l) in acetonitrile (7.00 ml) gave, after 20 h heating at reflux, a crude product that was purified by flash column chromatography (SiO<sub>2</sub>, 99:1 to 90:10 DCM:MeOH) to yield **18b** as an oil (280 mg, 37%). <sup>1</sup>H NMR (400 MHz, CDCl<sub>3</sub>)  $\delta = 8.45$ -8.37 (1H, m, =CH), 7.60 (1H, td,  $J = 7.6$  and  $1.8$ , =CH), 7.47-7.38 (2H, m, 2 x =CH), 7.34-7.23 (3H, m, 3 x =CH), 7.22-7.18 (1H, m, =CH), 7.11 (1H, ddd,  $J = 7.5, 4.9$  and  $1.1$ , =CH), 5.50 (1H, d,  $J = 8.0$ , CHNH), 4.87 (1H, dt,  $J = 7.8$  and  $6.9$ , NHCHCH<sub>2</sub>), 3.26 (3H, s, NCH<sub>3</sub>), 1.85-1.63 (2H, m, CHCH<sub>2</sub>CH<sub>3</sub>), 0.78 (3H, t,  $J = 7.4$ , CH<sub>2</sub>CH<sub>3</sub>). <sup>13</sup>C NMR (100 MHz, CDCl<sub>3</sub>)  $\delta = 161.3$  (C=O), 157.0 (=C), 149.2 (=CH), 143.5 (=C), 136.5 (=CH), 130.0 (=CH), 127.3 (=CH), 127.2 (=CH), 122.2 (=CH),

122.1 (=CH), 56.8 (NCH), 37.3 (NCH<sub>3</sub>), 29.5 (CH<sub>2</sub>), 10.3 (CH<sub>3</sub>).  $[\alpha]_D^{20} = -151$  (c = 1.00; CHCl<sub>3</sub>). IR (film, cm<sup>-1</sup>):  $\nu_{\max} = 3421, 2965, 2931, 1658, 750$ . HRMS (ESI<sup>+</sup>):  $m/z$  calcd for C<sub>16</sub>H<sub>20</sub>N<sub>3</sub>O [M+H]<sup>+</sup> 270.1601, found 270.1607.

### 1,3-dimethyl-1-phenyl-3-[(1S)-1-(pyridin-2-yl)propyl]urea (**8b**)

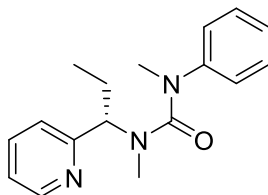

Following General procedure 2A, urea **18b** (230 mg, 0.85 mmol), MeI (0.06 ml), NaH (45 mg) in THF (2.13 ml) gave, after purification by flash column chromatography (SiO<sub>2</sub>, 80:20 to 0:100 Pet.Ether:EtOAc), **8b** as an oil (230 mg, 95%). <sup>1</sup>H NMR (400 MHz, CDCl<sub>3</sub>)  $\delta$  = 8.57-8.47 (1H, m, =CH), 7.62 (1H, td,  $J$  = 10.7 and 1.8, =CH), 7.34 (1H, d,  $J$  =, =CH), 7.31-7.25 (2H, m, 2 x =CH), 7.14 (1H, ddd,  $J$  = 7.5, 4.9 and 1.1, =CH), 7.11-7.05 (3H, m, 3 x =CH), 5.25 (1H, dd,  $J$  = 8.9 and 6.7, NCHCH<sub>2</sub>), 3.21 (3H, s, NCH<sub>3</sub>), 2.43 (3H, s, NCH<sub>3</sub>), 2.13 (1H, dq,  $J$  = 14.4 and 7.3, CHCH<sub>A</sub>H<sub>B</sub>CH<sub>3</sub>), 1.83 (1H, ddq,  $J$  = 14.0, 8.9 and 7.5, CHCH<sub>A</sub>H<sub>B</sub>CH<sub>3</sub>), 0.91 (3H, t,  $J$  = 7.4, CH<sub>2</sub>CH<sub>3</sub>). <sup>13</sup>C NMR (100 MHz, CDCl<sub>3</sub>)  $\delta$  = 162.7 (C=O), 160.0 (=C), 148.8 (=CH), 147.1 (=C), 136.5 (=CH), 129.5 (=CH), 124.7 (=CH), 124.6 (=CH), 123.6 (=CH), 122.2 (=CH), 61.9 (NCH), 40.4 (NCH<sub>3</sub>), 31.5 (NCH<sub>3</sub>), 23.3 (CH<sub>2</sub>), 11.5 (CH<sub>3</sub>).  $[\alpha]_D^{20} = -88$  (c = 1.00; CHCl<sub>3</sub>). IR (film, cm<sup>-1</sup>):  $\nu_{\max} = 2968, 2931, 1641$ . HRMS (ESI<sup>+</sup>):  $m/z$  calcd for C<sub>17</sub>H<sub>22</sub>N<sub>3</sub>O [M+H]<sup>+</sup> 284.1757, found 284.1760.

### 1,3-dimethyl-1-phenyl-3-[(1S)-1-(pyridin-2-yl)but-3-en-1-yl]urea (**18c**)

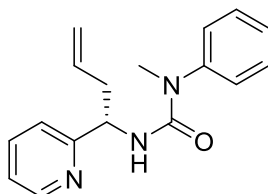

Following general procedure 1, *N*-methyl-*N*-phenyl carbamoyl chloride (230 mg), 2-pyridine **6c** (200 mg, 1.35 mmol), synthesized from **4**, and Et<sub>3</sub>N (207  $\mu$ l) in acetonitrile (3.40 ml) gave, after 20 h heating at reflux, a crude product that was purified by flash column chromatography (SiO<sub>2</sub>, 99:1 to 90:10 DCM:MeOH) to yield **18c** as an oil (270 mg, 71%). <sup>1</sup>H NMR (400 MHz, CDCl<sub>3</sub>)  $\delta$  = 8.48-8.37 (1H, m, =CH), 7.60 (1H, td,  $J$  = 7.7 and 1.8, =CH), 7.47-7.37 (2H, m, 2 x =CH), 7.35-7.23 (3H, m, 3 x =CH), 7.20 (1H, d,  $J$  = 7.8, =CH), 7.11 (1H, ddd,  $J$  = 7.5, 4.8 and 1.0, =CH), 5.61 (1H, ddt,  $J$  = 17.1, 10.4 and 7.2, CH<sub>2</sub>CH=CH<sub>2</sub>), 5.43 (1H, d,  $J$  = 7.7, CHNH), 5.01 (1H, dt,  $J$  = 7.1 and 6.8, NHCHCH<sub>2</sub>), 4.97-4.83 (2H, m, =CH<sub>2</sub>), 3.26 (3H, s, NCH<sub>3</sub>), 2.61-2.39 (2H, m, CHCH<sub>2</sub>CH=). <sup>13</sup>C NMR (100 MHz, CDCl<sub>3</sub>)  $\delta$  = 160.9 (C=O), 156.8 (=C), 149.2 (=CH), 143.5 (=C), 136.5 (=CH), 134.4 (=CH), 130.0 (=CH), 127.4 (=CH), 127.3 (=CH), 122.1 (=CH), 121.9 (=CH), 117.9 (=CH<sub>2</sub>), 55.1 (NCH), 40.7 (CH<sub>2</sub>), 37.3 (NCH<sub>3</sub>).  $[\alpha]_D^{20} = +40$  (c = 1.00; CHCl<sub>3</sub>). IR (film, cm<sup>-1</sup>):  $\nu_{\max} = 3080, 2946, 1656, 1493$ . HRMS (ESI<sup>+</sup>):  $m/z$  calcd for C<sub>17</sub>H<sub>20</sub>N<sub>3</sub>O [M+H]<sup>+</sup> 282.1601, found 282.1602.

**1,3-dimethyl-1-phenyl-3-[(1S)-1-(pyridin-2-yl)but-3-en-1-yl]urea (8c)**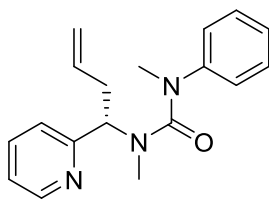

Following General procedure 2A, urea **18c** (260 mg, 0.92 mmol), MeI (0.07 mL), NaH (48 mg) in THF (2.30 mL) gave, after purification by flash column chromatography (SiO<sub>2</sub>, 80:20 to 0:100 Pet.Ether:EtOAc), **8c** as an oil (230 mg, 95%). <sup>1</sup>H NMR (400 MHz, CDCl<sub>3</sub>)  $\delta$  = 8.58-8.45 (1H, m, =CH), 7.62 (1H, td,  $J$  = 7.8 and 1.8, =CH), 7.37 (1H, d,  $J$  = 7.9, =CH), 7.30-7.21 (2H, m, 2 x =CH), 7.13 (1H, ddd,  $J$  = 7.5, 4.9 and 0.8, =CH), 7.12-7.03 (3H, m, 3 x =CH), 5.82 (1H, dddd,  $J$  = 17.2, 10.2, 8.2 and 5.6, CH<sub>2</sub>=CHCH<sub>2</sub>), 5.53 (1H, dd,  $J$  = 9.7 and 5.9, NCHCH<sub>2</sub>), 5.17-4.99 (2H, m, =CH<sub>2</sub>), 3.22 (3H, s, NCH<sub>3</sub>), 2.95-2.82 (1H, m, CHCH<sub>A</sub>H<sub>B</sub>CH=), 2.70-2.54 (1H, m, CHCH<sub>A</sub>H<sub>B</sub>CH=), 2.41 (3H, s, NCH<sub>3</sub>). <sup>13</sup>C NMR (100 MHz, CDCl<sub>3</sub>)  $\delta$  = 162.5 (C=O), 159.6 (=C), 148.8 (=CH), 146.9 (=C), 136.6 (=CH), 135.8 (=CH), 129.4 (=CH), 124.7 (2 x =CH), 123.6 (=CH), 122.4 (=CH), 117.3 (=CH<sub>2</sub>), 60.0 (NCH), 40.4 (NCH<sub>3</sub>), 34.6 (CH<sub>2</sub>), 31.8 (NCH<sub>3</sub>). [ $\alpha$ ]<sub>D</sub><sup>20</sup> = -96 ( $c$  = 1.00; CHCl<sub>3</sub>). IR (film, cm<sup>-1</sup>):  $\nu_{\text{max}}$  = 3064, 3005, 2925, 1640. HRMS (ESI<sup>+</sup>):  $m/z$  calcd for C<sub>18</sub>H<sub>22</sub>N<sub>3</sub>O [M+H]<sup>+</sup> 296.1757, found 296.1761.

**(S)-1-(4-methoxybenzyl)-3-methyl-3-phenyl-1-(1-(pyridin-3-yl)ethyl)urea (9), er 73:27**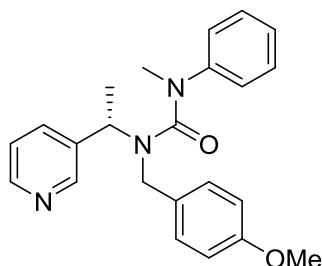

To a solution of **5c** (1.299 g, 5.36 mmol) in CH<sub>2</sub>Cl<sub>2</sub> (54 mL) at room temperature was added phenyl isocyanate (0.58 mL, 5.36 mmol) and the reaction mixture was stirred at room temperature for 3 h. The reaction mixture was evaporated *in vacuo*. The residue was dissolved in anhydrous DMF (54 mL), and the solution was cooled down to 0 °C. To the solution was added in portions NaH (60% suspension in oil, 0.43 g, 10.72 mmol). The reaction mixture was stirred at 0 °C for 15 min, then MeI (0.500 mL, 8.04 mmol) was added dropwise. The reaction mixture was allowed to warm up to room temperature and was stirred overnight. Then it was quenched at room temperature with water and evaporated *in vacuo*. The residue was dissolved in ethyl acetate and extracted from water three times. The combined organic layer was washed with brine, dried over MgSO<sub>4</sub> and evaporated *in vacuo*. The crude product was purified by flash column chromatography (50:50 Petrol-EtOAc, then 0:100) to give **9** as a brown oil (1.48 g, 74%, er 73:27).

$R_f$  0.37 (100% EtOAc). <sup>1</sup>H NMR (400 MHz, CDCl<sub>3</sub>)  $\delta$  = 8.48 (1H, dd,  $J$  = 4.7, 1.6, =CH), 8.41 (1H, d,  $J$  = 2.3, =CH), 7.52 (1H, dt,  $J$  = 8.0, 1.9, =CH), 7.35 – 7.29 (2H, m, 2 x =CH), 7.25 – 7.13 (2H, m, 2 x =CH), 6.99 – 6.93 (2H, m, 2 x =CH), 6.92 – 6.86 (2H, m, 2 x =CH), 6.80 – 6.74 (2H, m, 2 x =CH), 5.26 (1H, q,  $J$  = 7.0, CH-CH<sub>3</sub>), 3.87 (1H, d,  $J$  = 15.5, NHCH<sub>A</sub>H<sub>B</sub>), 3.77 (3H, s, OCH<sub>3</sub>), 3.71 (1H, d,  $J$  = 15.5, NHCH<sub>A</sub>H<sub>B</sub>), 3.10 (3H, s, NCH<sub>3</sub>), 1.37

(3H, d,  $J = 7.0$ , CH-CH<sub>3</sub>). <sup>13</sup>C NMR (101 MHz, CDCl<sub>3</sub>)  $\delta = 162.5$  (C=O), 158.6 (=C), 149.2 (=CH), 148.7 (=CH), 146.4 (=C), 136.9 (=C), 135.2 (=CH), 130.8 (=C), 129.6 (=CH), 128.7 (=CH), 125.5 (=CH), 125.0 (=CH), 123.3 (=CH), 113.6 (=CH), 55.3 (OCH<sub>3</sub>), 54.4 (CH-CH<sub>3</sub>), 47.3 (NHCH<sub>2</sub>), 39.9 (NCH<sub>3</sub>), 16.5 (CH-CH<sub>3</sub>). IR (film, cm<sup>-1</sup>):  $\nu_{\max} = 2996, 2928, 2835, 1644, 1495, 1243$ .  $[\alpha]_{\text{D}}^{23} = +11.9$  ( $c = 1.00$ ; CH<sub>2</sub>Cl<sub>2</sub>); HRMS (ESI<sup>+</sup>):  $m/z$  calcd for C<sub>23</sub>H<sub>26</sub>N<sub>3</sub>O<sub>2</sub> [M+H]<sup>+</sup> 376.2020, found 376.2007.

### 1-[(4-[Methoxyphenyl)methyl]-3,3-dimethyl-1-[(1S)-1-(pyridin-2-yl)ethyl]urea (10a)

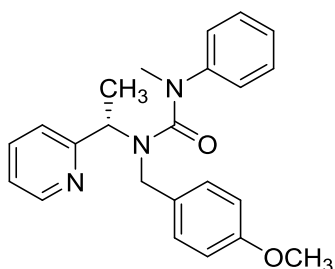

Following General procedure 1, *N*-methyl-*N*-phenyl carbamoyl chloride (77 mg), 2-pyridine **6d** (100 mg, 0.41 mmol) and Et<sub>3</sub>N (63  $\mu$ l) in acetonitrile (1.03 ml) gave, after 20 h heating at reflux, a crude product that was purified by flash column chromatography (SiO<sub>2</sub>, 80:20 to 20:80 Pet.Ether:EtOAc) to yield **10a** as an oil (155 mg, quant.). <sup>1</sup>H NMR (400 MHz, CDCl<sub>3</sub>)  $\delta = 8.55$ -8.44 (1H, m, =CH), 7.66-7.53 (1H, m, =CH), 7.33-7.06 (5H, m, 5 x =CH), 6.99-6.82 (4H, m, 4 x =CH), 6.81-6.66 (2H, m, 2 x =CH), 5.39-5.19 (1H, m, NCHCH<sub>3</sub>), 4.06 (1H, d,  $J = 15.7$ , NCH<sub>A</sub>H<sub>B</sub>), 3.85-3.64 (1H, superimposed d, NCH<sub>A</sub>H<sub>B</sub>), 3.78 (3H, s, OCH<sub>3</sub>), 3.08 (3H, s, NCH<sub>3</sub>), 1.39 (3H, d,  $J = 7.0$ , CHCH<sub>3</sub>). <sup>13</sup>C NMR (100 MHz, CDCl<sub>3</sub>)  $\delta = 162.5$  (C=O), 160.6 (=C), 158.4 (=C), 149.0 (=CH), 146.4 (=C), 136.5 (=CH), 131.5 (=C), 129.4 (=CH), 128.7 (=CH), 125.0 (=CH), 124.6 (=CH), 123.0 (=CH), 122.4 (=CH), 113.5 (=CH), 57.9 (NCH), 55.4 (OCH<sub>3</sub>), 47.0 (CH<sub>2</sub>), 39.6 (NCH<sub>3</sub>), 16.2 (CH<sub>3</sub>).  $[\alpha]_{\text{D}}^{20} = +90$  ( $c = 1.00$ ; CHCl<sub>3</sub>). IR (film, cm<sup>-1</sup>):  $\nu_{\max} = 2941, 2928, 1644, 1247$ . HRMS (ESI<sup>+</sup>):  $m/z$  calcd for C<sub>23</sub>H<sub>26</sub>N<sub>3</sub>O<sub>2</sub> [M+H]<sup>+</sup> 376.2025, found 376.2026.

### 3-[(4-[Methoxyphenyl)methyl]-1-methyl-1-(4-methylphenyl)-3-[(1S)-1-(pyridin-2-yl)ethyl]urea (10b)

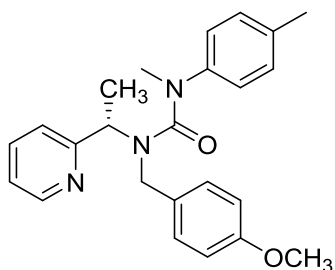

Following General procedure 1, *N*-methyl-*N*-(4-methylphenyl) carbamoyl chloride (39 mg), 2-pyridine **6d** (50 mg, 0.21 mmol) and Et<sub>3</sub>N (32  $\mu$ l) in acetonitrile (0.52 ml) gave, after 20 h heating at reflux, a crude product that was purified by flash column chromatography (SiO<sub>2</sub>, 80:20 to 20:80 Pet.Ether:EtOAc) to yield **10b** as an oil (52 mg, 64%). <sup>1</sup>H NMR (400 MHz, CDCl<sub>3</sub>)  $\delta = 8.57$ -8.44 (1H, m, =CH), 7.66-7.54 (1H, m, =CH), 7.24-7.05 (4H, m, 4 x =CH), 6.96-6.81 (4H, m, 4 x =CH), 6.80-6.70 (2H, m, 2 x =CH), 5.34 (1H, q,  $J = 7.0$ ,

NCHCH<sub>3</sub>), 4.07 (1H, d, *J* = 15.5, NCH<sub>A</sub>H<sub>B</sub>), 3.77 (1H, d, *J* = 15.4, NCH<sub>A</sub>H<sub>B</sub>), 3.77 (3H, s, OCH<sub>3</sub>), 3.06 (3H, s, NCH<sub>3</sub>), 2.32 (3H, s, CH<sub>3</sub>), 1.60 (3H, d, *J* = 7.0, CHCH<sub>3</sub>). <sup>13</sup>C NMR (100 MHz, CDCl<sub>3</sub>) δ = 162.6 (C=O), 160.8 (=C), 158.4 (=C), 149.0 (=CH), 143.9 (=C), 136.4 (=CH), 134.8 (=C), 131.6 (=C), 130.0 (=CH), 128.7 (=CH), 124.7 (=CH), 123.0 (=CH), 122.3 (=CH), 113.5 (=CH), 57.9 (NCH), 55.3 (OCH<sub>3</sub>), 47.0 (CH<sub>2</sub>), 39.9 (NCH<sub>3</sub>), 21.0 (CH<sub>3</sub>), 16.2 (CH<sub>3</sub>). [α]<sub>D</sub><sup>20</sup> = +20 (c = 1.00; CHCl<sub>3</sub>). IR (film, cm<sup>-1</sup>): ν<sub>max</sub> = 2976, 1646, 1245, 1038. HRMS (ESI<sup>+</sup>): *m/z* calcd for C<sub>24</sub>H<sub>28</sub>N<sub>3</sub>O<sub>2</sub> [M+H]<sup>+</sup> 390.2176, found 390.2181.

#### 1-(3-Methoxyphenyl)-3-[(4-[methoxyphenyl)methyl]-1-methyl-3-[(1S)-1-(pyridin-2-yl)ethyl]urea (10c)

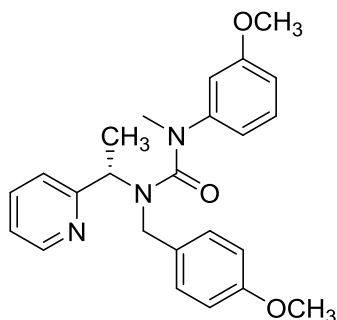

Following General procedure 1, *N*-methyl-*N*-(3-methoxyphenyl) carbamoyl chloride (82 mg), 2-pyridine **6d** (100 mg, 0.41 mmol) and Et<sub>3</sub>N (63 μl) in acetonitrile (1.03 ml) gave, after 20 h heating at reflux, a crude product that was purified by flash column chromatography (SiO<sub>2</sub>, 80:20 to 20:80 Pet.Ether:EtOAc) to yield **10c** as an oil (64 mg, 38%). <sup>1</sup>H NMR (400 MHz, CDCl<sub>3</sub>) δ = 8.56-8.45 (1H, m, =CH), 7.60 (1H, td, *J* = 7.7 and 1.8, =CH), 7.23-7.10 (3H, m, 3 x =CH), 6.97-6.89 (2H, m, 2 x =CH), 6.78-6.71 (2H, m, 2 x =CH), 6.66 (1H, dd, *J* = 8.3 and 1.9, =CH), 6.61-6.54 (1H, m, =CH), 6.53-6.47 (1H, m, =CH), 5.35 (1H, q, *J* = 7.0, NCHCH<sub>3</sub>), 4.14 (1H, d, *J* = 15.5, NCH<sub>A</sub>H<sub>B</sub>), 3.84 (1H, d, *J* = 15.5, NCH<sub>A</sub>H<sub>B</sub>), 3.75 (3H, s, OCH<sub>3</sub>), 3.69 (3H, s, OCH<sub>3</sub>), 3.08 (3H, s, NCH<sub>3</sub>), 1.43 (3H, d, *J* = 7.0, CHCH<sub>3</sub>). <sup>13</sup>C NMR (100 MHz, CDCl<sub>3</sub>) δ = 162.3 (C=O), 160.6 (=C), 160.4 (=C), 158.4 (=C), 149.0 (=CH), 147.6 (=C), 136.5 (=CH), 131.6 (=C), 130.0 (=CH), 128.7 (=CH), 122.9 (=CH), 122.3 (=CH), 116.6 (=CH), 113.5 (=CH), 110.7 (=CH), 109.8 (=CH), 57.9 (NCH), 55.3 (2 x OCH<sub>3</sub>), 47.0 (CH<sub>2</sub>), 39.5 (NCH<sub>3</sub>), 16.4 (CH<sub>3</sub>). [α]<sub>D</sub><sup>20</sup> = -34 (c = 1.00; CHCl<sub>3</sub>). IR (film, cm<sup>-1</sup>): ν<sub>max</sub> = 2973, 2918, 1652, 1250, 1034. HRMS (ESI<sup>+</sup>): *m/z* calcd for C<sub>24</sub>H<sub>28</sub>N<sub>3</sub>O<sub>3</sub> [M+ H]<sup>+</sup> 406.2125, found 406.2130.

#### 1-(4-Chlorophenyl)-3-[(4-[methoxyphenyl)methyl]-1-methyl-3-[(1S)-1-(pyridin-2-yl)ethyl]urea (10d)

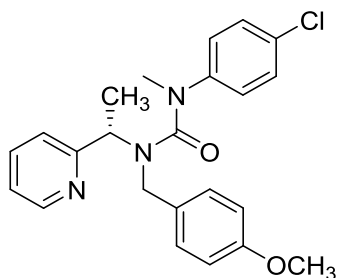

Following general procedure 1, *N*-methyl-*N*-(4-chlorophenyl) carbamoyl chloride (43 mg), 2-pyridine **6d** (50 mg, 0.21 mmol) and Et<sub>3</sub>N (32 μl) in acetonitrile (0.52 ml) gave, after 20 h heating at reflux, a crude product

that was purified by flash column chromatography (SiO<sub>2</sub>, 80:20 to 20:80 Pet.Ether:EtOAc) to yield **10d** as an oil (48 mg, 56%). <sup>1</sup>H NMR (400 MHz, CDCl<sub>3</sub>) δ = 8.89-8.48 (1H, m, =CH), 7.64 (1H, td, *J* = 7.6 and 1.8, =CH), 7.29-7.20 (3H, m, 3 x =CH), 7.18-7.10 (1H, m, =CH), 6.95-6.82 (4H, m, 4 x =CH), 6.79-6.69 (2H, m, 2 x =CH), 5.35 (1H, q, *J* = 6.9, NCHCH<sub>3</sub>), 4.05 (1H, d, *J* = 15.7, NCH<sub>A</sub>H<sub>B</sub>), 3.80 (1H, d, *J* = 15.7, NCH<sub>A</sub>H<sub>B</sub>), 3.77 (3H, s, OCH<sub>3</sub>), 3.02 (3H, s, NCH<sub>3</sub>), 1.45 (3H, d, *J* = 7.0, CHCH<sub>3</sub>). <sup>13</sup>C NMR (100 MHz, CDCl<sub>3</sub>) δ = 162.1 (C=O), 160.4 (=C), 158.5 (=C), 149.2 (=CH), 144.8 (=C), 136.6 (=CH), 131.3 (=C), 129.9 (=C), 129.4 (=CH), 128.5 (=CH), 125.2 (=CH), 122.7 (=CH), 122.5 (=CH), 113.6 (=CH), 57.9 (NCH), 55.4 (OCH<sub>3</sub>), 47.2 (CH<sub>2</sub>), 39.2 (NCH<sub>3</sub>), 16.5 (CH<sub>3</sub>). [α]<sub>D</sub><sup>20</sup> = +16 (c = 1.00; CHCl<sub>3</sub>). IR (film, cm<sup>-1</sup>): ν<sub>max</sub> = 2978, 1648, 1245, 1040. HRMS (ESI<sup>+</sup>): *m/z* calcd for C<sub>23</sub>H<sub>24</sub>ClN<sub>3</sub>O<sub>2</sub>Na [M+Na]<sup>+</sup> 432.1449, found 432.1448.

#### 1-(3-Chlorophenyl)-3-[(4-[methoxyphenyl)methyl]-1-methyl-3-[(1S)-1-(pyridin-2-yl)ethyl]urea (10e)

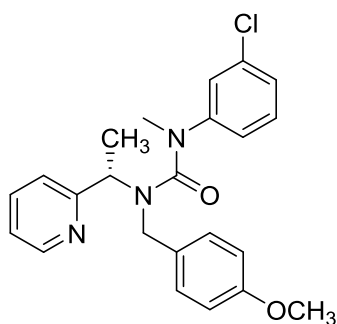

Following General procedure 1, *N*-methyl-*N*-(3-chlorophenyl) carbamoyl chloride (84 mg), 2-pyridine **6d** (100 mg, 0.41 mmol), Et<sub>3</sub>N (63 μl) and DMAP (cat.) in dichloroethane (1.03 ml) gave, after 20 h heating at reflux, a crude product that was purified by flash column chromatography (SiO<sub>2</sub>, 80:20 to 20:80 Pet.Ether:EtOAc) to yield **10e** as an oil (78 mg, 46%). <sup>1</sup>H NMR (400 MHz, CDCl<sub>3</sub>) δ = 8.61-8.52 (1H, m, =CH), 7.65 (1H, td, *J* = 7.7 and 1.8, =CH), 7.28-7.14 (3H, m, 3 x =CH), 7.06 (1H, ddd, *J* = 8.0, 1.9 and 0.9, =CH), 7.00-6.96 (1H, m, =CH), 6.92-6.86 (2H, m, 2 x =CH), 6.82 (1H, ddd, *J* = 8.1, 2.2 and 0.9, =CH), 6.80-6.73 (2H, m, 2 x =CH), 5.36 (1H, q, *J* = 7.0, NCHCH<sub>3</sub>), 4.03 (1H, d, *J* = 15.6, NCH<sub>A</sub>H<sub>B</sub>), 3.81 (1H, d, *J* = 15.7, NCH<sub>A</sub>H<sub>B</sub>), 3.78 (3H, s, OCH<sub>3</sub>), 3.02 (3H, s, NCH<sub>3</sub>), 1.48 (3H, d, *J* = 7.0, CHCH<sub>3</sub>). <sup>13</sup>C NMR (100 MHz, CDCl<sub>3</sub>) δ = 161.8 (C=O), 160.3 (=C), 158.5 (=C), 149.3 (=CH), 147.3 (=C), 136.7 (=CH), 134.7 (=C), 131.1 (=C), 130.2 (=CH), 128.5 (=CH), 124.4 (=CH), 123.9 (=CH), 122.7 (=CH), 122.5 (=CH), 121.5 (=CH), 113.6 (=CH), 57.8 (NCH), 55.4 (OCH<sub>3</sub>), 47.3 (CH<sub>2</sub>), 38.9 (NCH<sub>3</sub>), 16.4 (CH<sub>3</sub>). [α]<sub>D</sub><sup>20</sup> = +36.6 (c = 1.00; CHCl<sub>3</sub>). IR (film, cm<sup>-1</sup>): ν<sub>max</sub> = 2985, 1642, 1239, 1043. HRMS (ESI<sup>+</sup>): *m/z* calcd for C<sub>23</sub>H<sub>25</sub>ClN<sub>3</sub>O<sub>2</sub> [M+H]<sup>+</sup> 410.1635, found 410.1638.

**1-(2-Chlorophenyl)-3-[(4-[methoxyphenyl)methyl]-1-methyl-3-[(1S)-1-(pyridin-2-yl)ethyl]urea (10f)**

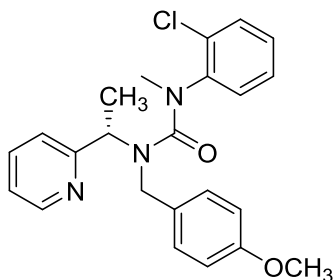

Following General procedure 1, *N*-methyl-*N*-(2-chlorophenyl) carbamoyl chloride (43 mg), 2-pyridine **6d** (50 mg, 0.21 mmol), Et<sub>3</sub>N (32  $\mu$ l) and DMAP (cat.) in dichloroethane (0.52 ml) gave, after 20 h heating at reflux, a crude product that was purified by flash column chromatography (SiO<sub>2</sub>, 80:20 to 20:80 Pet.Ether:EtOAc) to yield **10f** as an oil (83 mg, 96%). <sup>1</sup>H NMR (400 MHz, CDCl<sub>3</sub>)  $\delta$  = 8.53-8.42 (1H, m, =CH), 7.57 (1H, td, *J* = 7.7 and 1.8, =CH), 7.48-7.38 (1H, m, =CH), 7.22-7.15 (2H, m, 2 x =CH), 7.14-7.07 (2H, m, 2 x =CH), 7.05-6.97 (2H, m, 2 x =CH), 6.93-6.85 (1H, m, =CH), 6.82-6.69 (2H, m, 2 x =CH), 4.95 (1H, q, *J* = 7.0, NCHCH<sub>3</sub>), 4.12 (1H, d, *J* = 15.0, NCH<sub>A</sub>H<sub>B</sub>), 3.85 (1H, d, *J* = 15.0, NCH<sub>A</sub>H<sub>B</sub>), 3.77 (3H, s, OCH<sub>3</sub>), 3.08 (3H, s, NCH<sub>3</sub>), 1.22 (3H, d, *J* = 7.0, CHCH<sub>3</sub>). <sup>13</sup>C NMR (100 MHz, CDCl<sub>3</sub>)  $\delta$  = 162.9 (C=O), 160.4 (=C), 158.4 (=C), 148.8 (=CH), 143.7 (=C), 136.5 (=CH), 131.8 (=C), 131.1 (=C), 130.8 (=CH), 129.4 (=CH), 129.3 (=CH), 128.0 (=CH), 127.9 (=CH), 122.9 (=CH), 122.3 (=CH), 113.4 (=CH), 58.3 (NCH), 55.3 (OCH<sub>3</sub>), 47.1 (CH<sub>2</sub>), 38.4 (NCH<sub>3</sub>), 15.9 (CH<sub>3</sub>). [ $\alpha$ ]<sub>D</sub><sup>20</sup> = -16 (*c* = 1.00; CHCl<sub>3</sub>). IR (film, cm<sup>-1</sup>):  $\nu_{\max}$  = 2993, 1640, 1235, 1039. HRMS (ESI<sup>+</sup>): *m/z* calcd for C<sub>23</sub>H<sub>24</sub>ClN<sub>3</sub>O<sub>2</sub>Na [M+Na]<sup>+</sup> 432.1449, found 432.1443.

**1-(4-Cyanophenyl)-3-[(4-[methoxyphenyl)methyl]-1-methyl-3-[(1S)-1-(pyridin-2-yl)ethyl]urea (10g)**

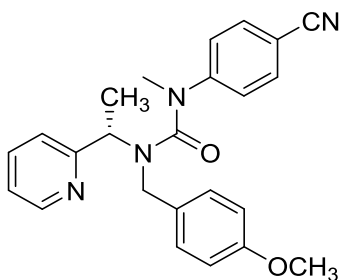

Following general procedure 1, *N*-methyl-*N*-(4-cyanophenyl) carbamoyl chloride (41 mg), 2-pyridine **6d** (50 mg, 0.21 mmol) and Et<sub>3</sub>N (32  $\mu$ l) in acetonitrile (0.52 ml) gave, after 20 h heating at reflux, a crude product that was purified by flash column chromatography (SiO<sub>2</sub>, 80:20 to 20:80 Pet.Ether:EtOAc) to yield **10g** as an oil (84 mg, quant. yield). <sup>1</sup>H NMR (400 MHz, CDCl<sub>3</sub>)  $\delta$  = 8.60-8.50 (1H, m, =CH), 7.68 (1H, td, *J* = 7.7 and 1.8, =CH), 7.55-7.45 (2H, m, 2 x =CH), 7.36-7.29 (1H, m, =CH), 7.21 (1H, ddd, *J* = 7.5, 4.8 and 1.0, =CH), 7.01-6.91 (2H, m, 2 x =CH), 6.85-6.68 (4H, m, 4 x =CH), 5.46 (1H, q, *J* = 7.1, NCHCH<sub>3</sub>), 4.10 (1H, d, *J* = 15.8, NCH<sub>A</sub>H<sub>B</sub>), 3.91 (1H, d, *J* = 15.8, NCH<sub>A</sub>H<sub>B</sub>), 3.76 (3H, s, OCH<sub>3</sub>), 2.95 (3H, s, NCH<sub>3</sub>), 1.60 (3H, d, *J* = 7.1, CHCH<sub>3</sub>). <sup>13</sup>C NMR (100 MHz, CDCl<sub>3</sub>)  $\delta$  = 160.9 (C=O), 159.8 (=C), 158.8 (=C), 149.4 (=CH), 149.2 (=C), 136.8 (=CH), 133.2 (=CH), 130.7 (=C), 128.1 (=CH), 122.7 (=CH), 122.5 (=CH), 120.1 (=CH), 119.2 (=C), 113.8 (=CH), 105.1 (CN), 57.7

(NCH), 55.4 (OCH<sub>3</sub>), 47.7 (CH<sub>2</sub>), 37.2 (NCH<sub>3</sub>), 16.8 (CH<sub>3</sub>).  $[\alpha]_D^{20} = +12$  (c = 1.00; CHCl<sub>3</sub>). IR (film, cm<sup>-1</sup>):  $\nu_{\max} = 2935, 2221, 1657, 1245, 1034$ . HRMS (ESI<sup>+</sup>):  $m/z$  calcd for C<sub>24</sub>H<sub>24</sub>N<sub>4</sub>O<sub>2</sub>Na [M+Na]<sup>+</sup> 423.1791, found 423.1791.

**1-[(4-[Methoxyphenyl)methyl]-3-methyl-3-phenyl-1-[(1S)-1-(pyridin-2-yl)but-3-en-1-yl]urea (10h)**

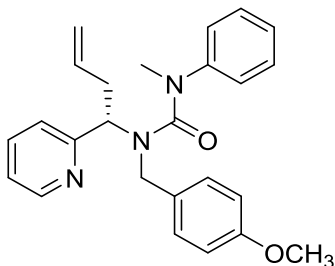

Following general procedure 1, *N*-methyl-*N*-phenyl carbamoyl chloride (58 mg), 2-pyridine **6e** (90 mg, 0.34 mmol) and Et<sub>3</sub>N (52  $\mu$ l) in acetonitrile (0.84 ml) gave, after 20 h heating at reflux, a crude product that was purified by flash column chromatography (SiO<sub>2</sub>, 80:20 to 20:80 Pet.Ether:EtOAc) to yield **10h** as an oil (80 mg, 59%). <sup>1</sup>H NMR (400 MHz, CDCl<sub>3</sub>)  $\delta$  = 8.50-8.41 (1H, m, =CH), 7.57 (1H, td,  $J$  = 7.7 and 1.8, =CH), 7.32-7.22 (2H, m, 2 x =CH), 7.16-7.02 (3H, m, 3 x =CH), 6.95-6.88 (2H, m, =CH), 6.68 (4H, s, 4 x =CH), 5.67 (1H, dddd,  $J$  = 17.1, 10.0, 7.6 and 6.4, CH<sub>2</sub>=CHCH<sub>2</sub>), 5.30 (1H, t,  $J$  = 7.6, CHCH<sub>2</sub>), 5.09-4.90 (2H, m, =CH<sub>2</sub>), 4.23 (1H, d,  $J$  = 15.5, NCH<sub>A</sub>H<sub>B</sub>), 3.94 (1H, d,  $J$  = 15.5, NCH<sub>A</sub>H<sub>B</sub>), 3.75 (3H, s, OCH<sub>3</sub>), 3.04 (3H, s, NCH<sub>3</sub>), 2.94-2.79 (1H, m, CH<sub>A</sub>CH<sub>B</sub>CH=), 2.68-2.52 (1H, m, CH<sub>A</sub>CH<sub>B</sub>CH=). <sup>13</sup>C NMR (100 MHz, CDCl<sub>3</sub>)  $\delta$  = 162.4 (C=O), 158.9 (=C), 158.3 (=C), 149.0 (=CH), 143.4 (=C), 136.5 (=CH), 135.3 (=CH), 131.5 (=C), 129.4 (=CH), 128.5 (=CH), 124.9 (=CH), 124.7 (=CH), 124.5 (=CH), 122.6 (=CH), 117.5 (=CH<sub>2</sub>), 113.4 (=CH), 61.9 (NCH), 55.3 (OCH<sub>3</sub>), 46.6 (CH<sub>2</sub>), 39.6 (NCH<sub>3</sub>), 35.5 (CH<sub>2</sub>).  $[\alpha]_D^{20} = -40$  (c = 1.00; CHCl<sub>3</sub>). IR (film, cm<sup>-1</sup>):  $\nu_{\max} = 3064, 2930, 1642, 1244, 1036$ . HRMS (ESI<sup>+</sup>):  $m/z$  calcd for C<sub>25</sub>H<sub>28</sub>N<sub>3</sub>O<sub>2</sub> [M+H]<sup>+</sup> 402.2176, found 402.2178.

## - LDA-mediated rearrangement of ureas and their hydrolysis

### (*R*)-1,3-dimethyl-1-(1-phenyl-1-(pyridin-3-yl)ethyl)urea (**11a**)<sup>6</sup>

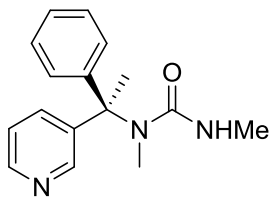

Following General procedure 3, urea **7a** (72 mg, 0.266 mmol), freshly prepared LDA (0.75 M in THF, 0.89 ml, 0.666 mmol) and THF (2.7 ml) gave after purification by flash column chromatography (SiO<sub>2</sub>, 99:1 to 97:3 CH<sub>2</sub>Cl<sub>2</sub>:MeOH), **11a** as a yellow solid (47 mg, 65%). *R<sub>f</sub>* 0.14 (95:5 CH<sub>2</sub>Cl<sub>2</sub>:MeOH); <sup>1</sup>H NMR (400 MHz, CDCl<sub>3</sub>) δ = 8.52 (1H, br s, =CH), 8.42 (1H, br s, =CH), 7.56 – 7.48 (m, 1H, =CH), 7.32 – 7.14 (6H, m, 6 x =CH), 4.13 (1H, br s, NHCH<sub>3</sub>), 2.83 (3H, s, CH<sub>3</sub>CNCH<sub>3</sub>), 2.55 (3H, d, *J* = 4.6 Hz, NHCH<sub>3</sub>), 2.08 (3H, s, CH<sub>3</sub>CNCH<sub>3</sub>). <sup>13</sup>C NMR (126 MHz, CDCl<sub>3</sub>) δ = 159.7 (C=O), 148.6 (=CH), 147.9 (=CH), 144.7, 141.3, 134.6 (=CH), 128.9 (=CH), 127.6 (=CH), 127.1 (=CH), 123.2 (=CH), 66.2 (CH<sub>3</sub>CNCH<sub>3</sub>), 34.6 (CH<sub>3</sub>CNCH<sub>3</sub>), 29.8 (CH<sub>3</sub>CNCH<sub>3</sub>), 27.7 (NHCH<sub>3</sub>). **Mp** = 145-146 °C. HRMS (ESI<sup>+</sup>): *m/z* calcd for C<sub>16</sub>H<sub>20</sub>N<sub>3</sub>O [M+H]<sup>+</sup> 270.1601, found 270.1625.

### (*R*)-1-(1-(4-fluorophenyl)-1-(pyridin-3-yl)ethyl)-1,3-dimethylurea (**11b**)

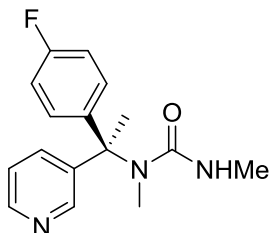

Following general procedure 3, urea **7b** (94 mg, 0.328 mmol), freshly prepared LDA (0.75 M in THF, 1.09 ml, 0.819 mmol) and THF (3.3 ml) gave after purification by flash column chromatography (SiO<sub>2</sub>, 99:1 to 95:5 CH<sub>2</sub>Cl<sub>2</sub>:MeOH), **11b** as a white solid (70 mg, 74%). *R<sub>f</sub>* 0.14 (95:5 CH<sub>2</sub>Cl<sub>2</sub>:MeOH). <sup>1</sup>H NMR (400 MHz, CDCl<sub>3</sub>) δ = 8.59 – 8.35 (2H, m, 2 x =CH), 7.52 – 7.47 (1H, m, =CH), 7.23 – 7.15 (3H, m, 3 x =CH), 7.00 – 6.92 (2H, m, 2 x =CH), 4.24 (1H, dd, *J* = 8.7, 4.4, NHCH<sub>3</sub>), 2.79 (3H, s, CH<sub>3</sub>-C-N-CH<sub>3</sub>), 2.59 (3H, d, *J* = 4.6, NHCH<sub>3</sub>), 2.06 (3H, s, CH<sub>3</sub>-C-N-CH<sub>3</sub>). <sup>13</sup>C NMR (101 MHz, CDCl<sub>3</sub>) δ = 161.8 (d, <sup>1</sup>*J*<sub>CF</sub> = 247.2 Hz, =C-F), 159.6 (C=O), 148.3 (=CH), 147.8 (=CH), 141.5 (=C), 140.5 (d, <sup>4</sup>*J*<sub>CF</sub> = 3.4 Hz, =C), 134.5 (=CH), 128.8 (d, <sup>3</sup>*J*<sub>CF</sub> = 8.0 Hz, =CH), 123.3 (=CH), 115.6 (d, <sup>2</sup>*J*<sub>CF</sub> = 21.3 Hz, =CH), 65.8 (CH<sub>3</sub>-C-N-CH<sub>3</sub>), 34.7 (CH<sub>3</sub>-C-N-CH<sub>3</sub>), 29.7 (CH<sub>3</sub>-C-N-CH<sub>3</sub>), 27.7 (NHCH<sub>3</sub>). **Mp** = 126-127 °C. [α]<sub>D</sub><sup>25</sup> = +10 (c = 1.00; CH<sub>2</sub>Cl<sub>2</sub>). IR (film, cm<sup>-1</sup>): ν<sub>max</sub> = 3345, 2946, 1635, 1507, 1323, 1226, 1163, 1081, 814, 728. HRMS (ESI<sup>+</sup>): *m/z* calcd for C<sub>16</sub>H<sub>19</sub>N<sub>3</sub>OF [M+H]<sup>+</sup> 288.1507, found 288.1492.

<sup>6</sup> Data in agreement with the literature (reference: Clayden, J.; Hennecke, U. *Org. Lett.* **2008**, *10*, 3567).

**(R)-1-(1-(4-chlorophenyl)-1-(pyridin-3-yl)ethyl)-1,3-dimethylurea (11c)**

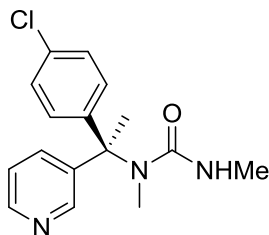

Following general procedure 3, urea **7c** (91 mg, 0.298 mmol), freshly prepared LDA (0.75 M in THF, 0.99 ml, 0.750 mmol) and THF (3.0 ml) gave after purification by flash column chromatography (SiO<sub>2</sub>, 99:1 to 95:5 CH<sub>2</sub>Cl<sub>2</sub>:MeOH), **11c** as a white solid (57 mg, 63%). *R<sub>f</sub>* 0.12 (95:5 CH<sub>2</sub>Cl<sub>2</sub>:MeOH). <sup>1</sup>H NMR (400 MHz, CDCl<sub>3</sub>) δ = 8.64 – 8.43 (2H, m, 2 x =CH), 7.56 (1H, ddd, *J* = 8.1, 2.3, 1.5, =CH), 7.33 – 7.19 (5H, m, 6 x =CH), 4.28 (1H, dd, *J* = 8.4, 4.1, NHCH<sub>3</sub>), 2.86 (3H, s, CH<sub>3</sub>C-NCH<sub>3</sub>), 2.67 (3H, d, *J* = 4.7 Hz, NHCH<sub>3</sub>), 2.12 (3H, s, CH<sub>3</sub>C-NCH<sub>3</sub>). <sup>13</sup>C NMR (101 MHz, CDCl<sub>3</sub>) δ = 159.6 (C=O), 148.4 (=CH), 148.0 (=CH), 143.5 (=C), 141.2 (=C), 134.5 (=C), 133.3 (=CH), 128.9 (=CH), 128.5 (=CH), 123.3 (=CH), 65.9 (CH<sub>3</sub>C-NCH<sub>3</sub>), 34.8 (CH<sub>3</sub>C-NCH<sub>3</sub>), 29.4 (CH<sub>3</sub>C-NCH<sub>3</sub>), 27.7 (NHCH<sub>3</sub>). *Mp* = 58-59 °C. [α]<sub>D</sub><sup>25</sup> = +20 (*c* = 2.00; CH<sub>2</sub>Cl<sub>2</sub>). IR (film, cm<sup>-1</sup>): ν<sub>max</sub> = 3345, 2948, 1639, 1532, 1491, 1415, 1326, 1095, 729. HRMS (ESI<sup>+</sup>): *m/z* calcd for C<sub>16</sub>H<sub>18</sub>N<sub>3</sub>OCl [M+H]<sup>+</sup> 304.1211, found 304.1207.

**(S)-1,3-dimethyl-1-(1-(pyridin-2-yl)-1-(pyridin-3-yl)ethyl)urea (11d)**

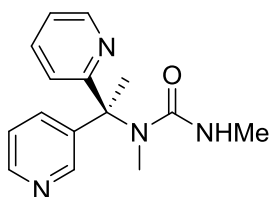

Following General procedure 3, urea **7d** (92 mg, 0.302 mmol), freshly prepared LDA (0.75 M in THF, 1.01 ml, 0.756 mmol) and THF (3.0 ml) gave after purification by flash column chromatography (SiO<sub>2</sub>, 99:1 to 95:5 CH<sub>2</sub>Cl<sub>2</sub>:MeOH), **11d** as a yellow oil (61 mg, 76%). *R<sub>f</sub>* 0.10 (95:5 CH<sub>2</sub>Cl<sub>2</sub>:MeOH); <sup>1</sup>H NMR (400 MHz, CDCl<sub>3</sub>) δ = 8.56 (1H, d, *J* = 2.4, =CH), 8.55 – 8.52 (1H, m, =CH), 8.47 (1H, dd, *J* = 4.7, 0.9, =CH), 7.72 – 7.64 (2H, m, 2 x =CH), 7.39 (1H, d, *J* = 8.1, =CH), 7.27 – 7.22 (1H, m, =CH), 7.17 (1H, dd, *J* = 7.4, 4.8, =CH), 5.00 (1H, br s, NHCH<sub>3</sub>), 3.01 (3H, s, CH<sub>3</sub>C-NCH<sub>3</sub>), 2.55 (3H, d, *J* = 4.6, NHCH<sub>3</sub>), 2.08 (3H, s, CH<sub>3</sub>C-NCH<sub>3</sub>). <sup>13</sup>C NMR (101 MHz, CDCl<sub>3</sub>) δ = 163.4 (=C), 159.7 (C=O), 149.0 (=CH), 148.5 (=CH), 148.0 (=CH), 140.4 (=C), 137.0 (=CH), 135.0 (=CH), 123.0 (=CH), 122.1 (=CH), 121.5 (=CH), 66.9 (CH<sub>3</sub>C-NCH<sub>3</sub>), 33.5 (CH<sub>3</sub>C-NCH<sub>3</sub>), 28.9 (CH<sub>3</sub>C-NCH<sub>3</sub>), 27.5 (NHCH<sub>3</sub>). *Mp* = 111-113 °C. IR (film, cm<sup>-1</sup>): ν<sub>max</sub> = 3350, 2924, 1640, 1533, 1329, 1082, 714. HRMS (ESI<sup>+</sup>): *m/z* calcd for C<sub>15</sub>H<sub>19</sub>N<sub>4</sub>O [M+H]<sup>+</sup> 271.1553, found 271.1541.

**(S)-1-(1,2-diphenyl-1-(pyridin-3-yl)ethyl)-1,3-dimethylurea (11e)**

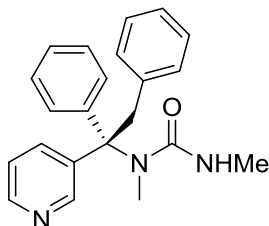

Following General procedure 3, urea **7e** (85 mg, 0.246 mmol), freshly prepared LDA (0.75 M in THF, 0.82 ml, 0.615 mmol) and THF (2.5 ml) gave after purification by flash column chromatography (SiO<sub>2</sub>, 99:1 to 95:5 CH<sub>2</sub>Cl<sub>2</sub>:MeOH), **11e** as a yellow solid (62 mg, 87%). *R<sub>f</sub>* 0.19 (95:5 CH<sub>2</sub>Cl<sub>2</sub>:MeOH). <sup>1</sup>H NMR (400 MHz, CDCl<sub>3</sub>) δ = 8.62 – 8.31 (2H, m, 2 x =CH), 7.60 (1H, d, *J* = 8.1 Hz, =CH), 7.38 – 7.08 (9H, m, 9 x =CH), 6.88 (2H, dd, *J* = 7.9, 1.4, 2 x =CH), 4.36 (1H, dd, *J* = 9.0, 4.7, NHCH<sub>3</sub>), 4.19 – 4.11 (2H, m, CH<sub>2</sub>Ph), 2.72 (3H, d, *J* = 4.6, NHCH<sub>3</sub>), 2.63 (3H, s, CH<sub>2</sub>C-NCH<sub>3</sub>). <sup>13</sup>C NMR (101 MHz, CDCl<sub>3</sub>) δ = 160.3 (C=O), 148.8 (=CH), 147.4 (=CH), 143.1 (=C), 140.7 (=C), 137.1 (=C), 135.0 (=CH), 131.2 (=CH), 128.3 (=CH), 128.0 (2 x =CH), 127.2 (=CH), 126.8 (=CH), 71.3 (NC-CH<sub>2</sub>), 43.4 (NC-CH<sub>2</sub>), 37.0 (CH<sub>2</sub>C-NCH<sub>3</sub>), 27.7 (NHCH<sub>3</sub>). *Mp* = 150-151 °C. [α]<sub>D</sub><sup>25</sup> = +37 (*c* = 2.00; CH<sub>2</sub>Cl<sub>2</sub>). IR (film, cm<sup>-1</sup>): ν<sub>max</sub> = 3362, 2924, 1636, 1527, 1414, 1319. HRMS (ESI<sup>+</sup>): *m/z* calcd for C<sub>22</sub>H<sub>24</sub>N<sub>3</sub>O [M+H]<sup>+</sup> 346.1914, found 346.1899.

**(S)-1-(1-(3-chlorophenyl)-2-phenyl-1-(pyridin-3-yl)ethyl)-1,3-dimethylurea (11f)**

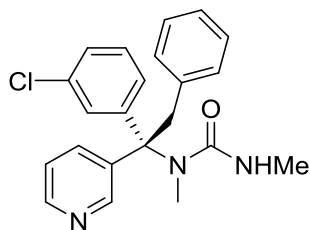

Following General procedure 3, urea **7f** (87 mg, 0.230 mmol), freshly prepared LDA (0.75 M in THF, 0.76 ml, 0.573 mmol) and THF (2.3 ml) gave after purification by flash column chromatography (SiO<sub>2</sub>, 99:1 to 97:3 CH<sub>2</sub>Cl<sub>2</sub>:MeOH), **11f** as a yellow solid (19 mg, 22%). *R<sub>f</sub>* 0.19 (95:5 CH<sub>2</sub>Cl<sub>2</sub>:MeOH). <sup>1</sup>H NMR (400 MHz, CDCl<sub>3</sub>) δ = 8.51 (1H, d, *J* = 1.0, =CH), 8.43 (1H, d, *J* = 4.1 Hz, =CH), 7.59 (1H, ddd, *J* = 8.1, 2.3, 1.5, =CH), 7.27 – 7.10 (8H, m, 8 x =CH), 6.89 – 6.84 (2H, m, 2 x =CH), 4.51 (1H, dd, *J* = 9.3, 5.3, NHCH<sub>3</sub>), 4.13 (2H, s, CH<sub>2</sub>Ph), 2.75 (3H, d, *J* = 4.6, NHCH<sub>3</sub>), 2.59 (3H, s, CH<sub>2</sub>C-NCH<sub>3</sub>). <sup>13</sup>C NMR (101 MHz, CDCl<sub>3</sub>) δ = 160.1 (C=O), 148.8 (=CH), 147.7 (=CH), 145.8 (=C), 139.9 (=C), 136.7 (=C), 135.1 (=CH), 134.1 (=CH), 131.1 (=CH), 129.5 (=CH), 128.1 (=CH), 127.9 (=CH), 127.2 (=CH), 126.9 (=CH), 125.8 (=CH), 122.9 (=CH), 71.0 (NCCH<sub>2</sub>), 43.0 (NCCH<sub>2</sub>), 37.2 (CH<sub>2</sub>C-NCH<sub>3</sub>), 27.7 (NHCH<sub>3</sub>). *Mp* = 88-90 °C. [α]<sub>D</sub><sup>25</sup> = +20 (*c* = 2.00; CH<sub>2</sub>Cl<sub>2</sub>). IR (film, cm<sup>-1</sup>): ν<sub>max</sub> = 3349, 2953, 1639, 1529, 1413, 1309, 907, 725, 700. HRMS (ESI<sup>+</sup>): *m/z* calcd for C<sub>22</sub>H<sub>23</sub>N<sub>3</sub>OCl [M+H]<sup>+</sup> 380.1524, found 380.1520.

**(S)-1-(1-(3-methoxyphenyl)-2-phenyl-1-(pyridin-3-yl)ethyl)-1,3-dimethylurea (11g)**

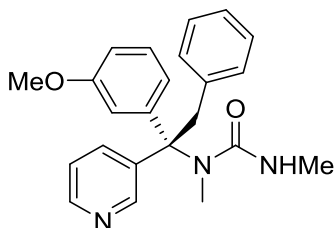

Following General procedure 3, urea **7g** (68 mg, 0.181 mmol), freshly prepared LDA (0.75 M in THF, 0.61 ml, 0.453 mmol) and THF (1.8 ml) gave after purification by flash column chromatography (SiO<sub>2</sub>, 99:1 to 97:3 CH<sub>2</sub>Cl<sub>2</sub>:MeOH), **11g** as a yellow solid (18 mg, 26%). *R<sub>f</sub>* 0.15 (95:5 CH<sub>2</sub>Cl<sub>2</sub>:MeOH). <sup>1</sup>H NMR (500 MHz, CDCl<sub>3</sub>) δ = 8.52 (1H, br s, =CH), 8.40 (1H, br d, *J* = 4.1, =CH), 7.58 (1H, ddd, *J* = 8.0, 2.2, 1.5, =CH), 7.24 – 7.10 (5H, m, 5 x =CH), 6.95 – 6.89 (3H, m, 3 x =CH), 6.85 (1H, t, *J* = 2.1, =CH), 6.76 (1H, dd, *J* = 8.2, 2.3, =CH), 4.37 (1H, dd, *J* = 8.5, 4.2, NHCH<sub>3</sub>), 4.15 (1H, d, *J* = 13.6, CH<sub>A</sub>H<sub>B</sub>Ph), 4.11 (1H, d, *J* = 13.6, CH<sub>A</sub>H<sub>B</sub>Ph), 3.70 (3H, s, OCH<sub>3</sub>), 2.72 (3H, d, *J* = 4.6, NHCH<sub>3</sub>), 2.64 (3H, s, CH<sub>2</sub>C-NCH<sub>3</sub>). <sup>13</sup>C NMR (126 MHz, CDCl<sub>3</sub>) δ = 160.2 (C=O), 159.4 (=C-OCH<sub>3</sub>), 148.9 (=CH), 147.5 (=CH), 144.9 (=C), 140.6 (=C), 137.2 (=C), 134.9 (=CH), 131.3 (=CH), 129.3 (=CH), 128.1 (=CH), 126.8 (=CH), 122.7 (=CH), 120.3 (=CH), 114.6 (=CH), 112.1 (=CH), 71.2 (NC-CH<sub>2</sub>), 55.3 (OCH<sub>3</sub>), 43.3 (NC-CH<sub>2</sub>), 37.2 (CH<sub>2</sub>C-NCH<sub>3</sub>), 27.7 (NHCH<sub>3</sub>). *Mp* = 71-73 °C. [α]<sub>D</sub><sup>25</sup> = +10 (*c* = 1.00; CH<sub>2</sub>Cl<sub>2</sub>). IR (film, cm<sup>-1</sup>): ν<sub>max</sub> = 3349, 2953, 1640, 1530, 1315, 724. HRMS (ESI<sup>+</sup>): *m/z* calcd for C<sub>23</sub>H<sub>25</sub>N<sub>3</sub>O<sub>2</sub>Na [M+Na]<sup>+</sup> 398.1839, found 398.1842.

**(R)-1,3-dimethyl-1-(2-phenyl-1-(pyridin-2-yl)-1-(pyridin-3-yl)ethyl)urea (11h)**

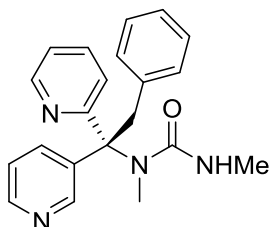

Following General procedure 3, urea **7h** (96 mg, 0.276 mmol), freshly prepared LDA (0.75 M in THF, 0.92 ml, 0.691 mmol) and THF (2.8 ml) gave after purification by flash column chromatography (SiO<sub>2</sub>, 99:1 to 95:5 CH<sub>2</sub>Cl<sub>2</sub>:MeOH), **11h** as a yellow solid (84 mg, 88%). *R<sub>f</sub>* 0.21 (95:5 CH<sub>2</sub>Cl<sub>2</sub>:MeOH). <sup>1</sup>H NMR (400 MHz, CDCl<sub>3</sub>) δ = 8.54 (1H, ddd, *J* = 4.8, 1.8, 0.9, =CH), 8.47 (1H, d, *J* = 2.2, =CH), 8.37 (1H, dd, *J* = 4.7, 1.4, =CH), 7.66 (1H, ddd, *J* = 8.1, 7.5, 1.9, =CH), 7.60 – 7.53 (2H, m, 2 x =CH), 7.20 – 7.06 (5H, m, 5 x =CH), 6.90 (2H, dd, *J* = 7.9, 1.5, 2 x =CH), 4.71 (1H, dd, *J* = 8.5, 4.0, NHCH<sub>3</sub>), 4.28 (1H, d, *J* = 13.1, CH<sub>A</sub>H<sub>B</sub>Ph), 4.04 (1H, d, *J* = 13.1, CH<sub>A</sub>H<sub>B</sub>Ph), 2.73 (3H, d, *J* = 5.3, NHCH<sub>3</sub>), 2.64 (3H, d, *J* = 4.6, CH<sub>2</sub>C-NCH<sub>3</sub>). <sup>13</sup>C NMR (101 MHz, CDCl<sub>3</sub>) δ = 162.1 (=C), 159.8 (C=O), 149.1 (=CH), 148.1 (=CH), 147.4 (=CH), 139.4 (=C), 137.0 (=C), 136.7 (=CH), 135.2 (=CH), 131.2 (=CH), 128.1 (=CH), 126.8 (=CH), 123.0 (=CH), 122.5 (=CH), 122.1 (=CH), 71.9 (NCCH<sub>2</sub>), 42.5 (NCCH<sub>2</sub>), 35.8 (CH<sub>2</sub>C-NCH<sub>3</sub>), 27.6 (NHCH<sub>3</sub>). *Mp* = 166-168 °C. [α]<sub>D</sub><sup>25</sup> = +5 (*c* = 2.00; CH<sub>2</sub>Cl<sub>2</sub>). IR (film, cm<sup>-1</sup>): ν<sub>max</sub> = 3349, 2923, 1640, 1533, 1319, 730. HRMS (ESI<sup>+</sup>): *m/z* calcd for C<sub>21</sub>H<sub>23</sub>N<sub>4</sub>O [M+H]<sup>+</sup> 347.1866, found 347.1851.

### 1-(4-fluorophenyl)-N-methyl-1-(pyridin-3-yl)ethan-1-amine (12b)

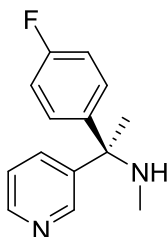

Following General procedure 4, urea **11b** (32 mg, 0.111 mmol), 10% aqueous NaOH solution (0.45 mL, 1.11 mmol), EtOH (0.89 mL) gave **12b** as a yellow oil (23 mg, 88%) without further purification. **<sup>1</sup>H NMR** (500 MHz, CDCl<sub>3</sub>)  $\delta$  = 8.61 (1H, d,  $J$  = 2.0, =CH), 8.47 (1H, dd,  $J$  = 4.7, 1.3, =CH), 7.63 (1H, ddd,  $J$  = 8.0, 2.3, 1.7, =CH), 7.33 – 7.27 (2H, m, 2 x =CH), 7.22 (1H, ddd,  $J$  = 8.1, 4.7, 0.5, =CH), 7.03 – 6.95 (2H, m, 2 x =CH), 2.20 (3H, s, N-C-CH<sub>3</sub>), 1.79 (3H, s, NHCH<sub>3</sub>). **<sup>13</sup>C NMR** (126 MHz, CDCl<sub>3</sub>)  $\delta$  = 161.7 (d,  $^1J_{CF}$  = 245.2 Hz, =CF), 149.0 (=CH), 148.0 (=CH), 143.1 (=C), 142.5 (d,  $^4J_{CF}$  = 3.1 Hz, =C), 134.8 (=CH), 128.8 (d,  $^3J_{CF}$  = 7.7 Hz, =CH), 123.1 (=CH), 115.1 (d,  $^2J_{CF}$  = 20.4 Hz, =CH), 61.5 (CH<sub>3</sub>NH-C-CH<sub>3</sub>), 29.8 (CH<sub>3</sub>NH-C-CH<sub>3</sub>), 26.9 (CH<sub>3</sub>NH-C-CH<sub>3</sub>). **IR** (film, cm<sup>-1</sup>):  $\nu_{max}$  = 3289, 2981, 1506, 1414.  **$[\alpha]_D^{23}$**  = -5.0 ( $c$  = 1.00; CH<sub>2</sub>Cl<sub>2</sub>). **HRMS** (ESI<sup>+</sup>):  $m/z$  calcd for C<sub>14</sub>H<sub>16</sub>N<sub>2</sub>F [M+H]<sup>+</sup> 231.1292, found 231.1289.

### (R)-1-(4-fluorophenyl)-N-methyl-1-(pyridin-3-yl)ethan-1-amine (12d)

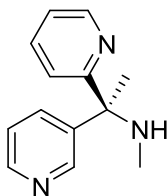

Following general procedure 4, urea **11d** (27 mg, 0.098 mmol), 10% aqueous NaOH solution (0.39 mL, 0.98 mmol), EtOH (0.78 mL) gave **12d** as a yellow oil (14 mg, 64%) without further purification. **<sup>1</sup>H NMR** (500 MHz, CDCl<sub>3</sub>)  $\delta$  = 8.58 – 8.47 (2H, m, 2 x =CH), 8.42 – 8.35 (1H, m, =CH), 7.66 (1H, dq,  $J$  = 8.1, 1.8, =CH), 7.55 (1H, tt,  $J$  = 7.8, 1.7, =CH), 7.22 – 7.13 (2H, m, 2 x =CH), 7.10 – 7.06 (1H, m, =CH), 2.16 (3H, s, N-C-CH<sub>3</sub>), 1.79 (3H, s, NHCH<sub>3</sub>). **<sup>13</sup>C NMR** (126 MHz, CDCl<sub>3</sub>)  $\delta$  = 165.1 (=C), 149.2 (=CH), 149.1 (=CH), 148.0 (=CH), 142.4 (=C), 136.5 (=CH), 134.9 (=CH), 123.2 (=CH), 121.9 (=CH), 121.6 (=CH), 63.1 (CH<sub>3</sub>NH-C-CH<sub>3</sub>), 29.7 (CH<sub>3</sub>NH-C-CH<sub>3</sub>), 25.1 (CH<sub>3</sub>NH-C-CH<sub>3</sub>). **IR** (film, cm<sup>-1</sup>):  $\nu_{max}$  = 3304, 2983, 2923, 1587, 1430, 1414.  **$[\alpha]_D^{23}$**  = +8.7 ( $c$  = 1.00; CH<sub>2</sub>Cl<sub>2</sub>). **HRMS** (ESI<sup>+</sup>):  $m/z$  calcd for C<sub>13</sub>H<sub>16</sub>N<sub>3</sub> [M+H]<sup>+</sup> 214.1339, found 214.1324.

### (R)-1-(4-methoxybenzyl)-3-methyl-1-(1-phenyl-1-(pyridin-3-yl)ethyl)urea (13)

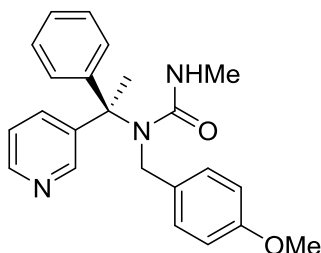

Following General procedure 3, urea **9** (0.995 g, 2.65 mmol), freshly prepared LDA (0.75 M in THF, 8.84 ml, 6.627 mmol) and THF (26.5 ml) gave after purification by flash column chromatography (SiO<sub>2</sub>, 99:1 to 95:5 CH<sub>2</sub>Cl<sub>2</sub>:MeOH), **13** as a yellow solid (0.845 g, 85%). *R<sub>f</sub>* 0.26 (95:5 CH<sub>2</sub>Cl<sub>2</sub>:MeOH); <sup>1</sup>H NMR (500 MHz, CDCl<sub>3</sub>) δ = 8.54 (1H, d, *J* = 2.5, =CH), 8.39 (1H, dd, *J* = 4.7, 1.5, =CH), 7.48 (1H, ddd, *J* = 8.1, 2.5, 1.5, =CH), 7.27 – 7.10 (8H, m, 8 x =CH), 6.86 – 6.80 (2H, m, 2 x =CH), 4.44 (1H, d, *J* = 17.5, NHCH<sub>A</sub>H<sub>B</sub>), 4.35 (1H, d, *J* = 17.5 Hz, NHCH<sub>A</sub>H<sub>B</sub>), 4.24 (1H, q, *J* = 4.7 Hz, CH-CH<sub>3</sub>), 3.75 (3H, s, OCH<sub>3</sub>), 2.51 (3H, d, *J* = 4.5, CH-CH<sub>3</sub>), 2.02 (3H, s, NCH<sub>3</sub>). <sup>13</sup>C NMR (101 MHz, CDCl<sub>3</sub>) δ = 160.3 (=C), 158.8 (=C), 148.8 (=CH), 147.8 (=CH), 144.2 (=C), 141.6 (=C), 134.9 (=CH), 131.5 (=CH), 128.6 (=CH), 127.5 (3x =CH), 123.0 (=CH), 114.4 (=CH), 67.2 (NH-C-CH<sub>3</sub>), 55.4 (OCH<sub>3</sub>), 50.5 (NHCH<sub>2</sub>), 31.0 (NH-C-CH<sub>3</sub>), 27.7 (NHCH<sub>3</sub>). *Mp* = 56-58 °C. [α]<sub>D</sub><sup>25</sup> = +0.25 (c = 1.00; CH<sub>2</sub>Cl<sub>2</sub>). IR (film, cm<sup>-1</sup>): ν<sub>max</sub> = 3440, 2951, 1645, 1510, 1243. HRMS (ESI<sup>+</sup>): *m/z* calcd for C<sub>23</sub>H<sub>26</sub>N<sub>3</sub>O<sub>2</sub> [M+H]<sup>+</sup> 376.2020, found 376.2003.

#### 1-[(1R)-1-(3-Chlorophenyl)-1-(pyridine-2-yl)ethyl]-1,3-dimethylurea (**14a**)

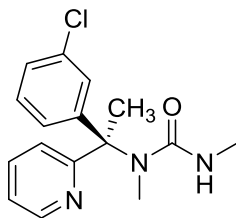

Following general procedure 3, LDA (0.21 ml), urea **8a** (50 mg, 0.17 mmol) and THF (1.56 ml) gave, after purification by flash column chromatography (SiO<sub>2</sub>, 99:1 to 90:10 DCM:MeOH), **14a** as an oil (48 mg, 96%). <sup>1</sup>H NMR (400 MHz, CDCl<sub>3</sub>) δ = 8.58-8.49 (1H, m, =CH), 7.69-7.58 (1H, m, =CH), 7.37-7.09 (6H, m, 6 x =CH), 5.08-4.85 (1H, brs, NHCH<sub>3</sub>), 2.95 (3H, s, NCH<sub>3</sub>), 2.55 (3H, d, *J* = 4.6, NHCH<sub>3</sub>), 2.06 (3H, s, CH<sub>3</sub>). <sup>13</sup>C NMR (100 MHz, CDCl<sub>3</sub>) δ = 163.5 (C=O), 159.9 (=C), 148.4 (=CH), 147.2 (=C), 136.8 (=CH), 134.1 (=C), 129.5 (=CH), 127.5 (=CH), 127.1 (=CH), 125.5 (=CH), 121.9 (=CH), 121.5 (=CH), 68.1 (NC), 33.7 (NCH<sub>3</sub>), 28.6 (NCH<sub>3</sub>), 27.4 (CH<sub>3</sub>). [α]<sub>D</sub><sup>20</sup> = -53 (c = 1.00; CHCl<sub>3</sub>). IR (film, cm<sup>-1</sup>): ν<sub>max</sub> = 3337, 2980, 2935, 1630. HRMS (ESI<sup>+</sup>): *m/z* calcd for C<sub>16</sub>H<sub>18</sub>ClN<sub>3</sub>ONa [M+Na]<sup>+</sup> 326.1036, found 326.1043.

### 1,3-Dimethyl-1-[(1R)-1-phenyl-1(pyridin-2-yl)propyl]urea (**14b**)

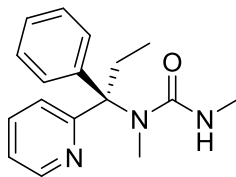

Following general procedure 3, LDA (0.44 ml), urea **8b** (100 mg, 0.35 mmol) and THF (3.53 ml) gave, after purification by flash column chromatography (SiO<sub>2</sub>, 99:1 to 90:10 DCM:MeOH), **14b** as an oil (88 mg, 88%). **<sup>1</sup>H NMR** (400 MHz, CDCl<sub>3</sub>)  $\delta$  = 8.58-8.53 (1H, m, =CH), 7.69 (1H, td,  $J$  = 7.9 and 1.8, =CH), 7.52-7.44 (1H, m, =CH), 7.35-7.27 (4H, m, 4 x =CH), 7.24-7.14 (2H, m, 2 x =CH), 5.82-5.63 (1H, m, NHCH<sub>3</sub>), 3.03 (3H, m, NCH<sub>3</sub>), 2.65-2.52 (2H, m, CH<sub>2</sub>CH<sub>3</sub>), 2.51 (3H, d,  $J$  = 4.6, NHCH<sub>3</sub>), 0.76 (3H, t,  $J$  = 7.3, CH<sub>2</sub>CH<sub>3</sub>). **<sup>13</sup>C NMR** (100 MHz, CDCl<sub>3</sub>)  $\delta$  = 162.6 (C=O), 160.3 (=C), 148.3 (=CH), 142.8 (=C), 136.6 (=CH), 128.3 (2 x =CH), 127.7 (=CH), 126.8 (=CH), 122.0 (=CH), 70.9 (NC), 33.5 (NCH<sub>3</sub>), 33.1 (CH<sub>2</sub>), 27.3 (NCH<sub>3</sub>), 10.1 (CH<sub>3</sub>).  $[\alpha]_D^{20}$  = -80 ( $c$  = 1.00; CHCl<sub>3</sub>). **IR** (film, cm<sup>-1</sup>):  $\nu_{\max}$  = 3341, 2970, 2937, 1635. **HRMS** (ESI<sup>+</sup>):  $m/z$  calcd for C<sub>17</sub>H<sub>21</sub>N<sub>3</sub>ONa [M+Na]<sup>+</sup> 306.1577, found 306.1581.

### 1,3-Dimethyl-1-[(1R)-1-phenyl-1(pyridin-2-yl)but-3-en-1-yl]urea (**14c**)

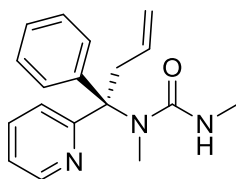

Following general procedure 3, LDA (0.42 ml), urea **8c** (100 mg, 0.34 mmol) and THF (3.39 ml) gave, after purification by flash column chromatography (SiO<sub>2</sub>, 99:1 to 90:10 DCM:MeOH), **14c** as an oil (67 mg, 67%). **<sup>1</sup>H NMR** (400 MHz, CDCl<sub>3</sub>)  $\delta$  = 8.59-8.46 (1H, m, =CH), 7.63 (1H, td,  $J$  = 8.0 and 1.8, =CH), 7.44 (1H, d,  $J$  = 8.1, =CH), 7.38-7.31 (2H, m, 2 x =CH), 7.30-7.23 (2H, m, 2 x =CH), 7.22-7.16 (1H, m, =CH), 7.12 (1H, ddd,  $J$  = 7.4, 4.8 and 0.8, =CH), 5.71 (1H, ddt,  $J$  = 17.1, 10.2 and 6.9, CH<sub>2</sub>=CHCH<sub>2</sub>), 5.23-5.08 (1H, m, NHCH<sub>3</sub>), 5.08-4.91 (2H, m, =CH<sub>2</sub>), 3.51 (1H, dd,  $J$  = 14.6 and 6.8, CH<sub>A</sub>CH<sub>B</sub>CH=), 3.41 (1H, dd,  $J$  = 14.6 and 7.0, CH<sub>A</sub>CH<sub>B</sub>CH=), 2.97 (3H, s, NCH<sub>3</sub>), 2.56 (3H, d,  $J$  = 4.6, NHCH<sub>3</sub>). **<sup>13</sup>C NMR** (100 MHz, CDCl<sub>3</sub>)  $\delta$  = 163.2 (C=O), 160.1 (=C), 148.3 (=CH), 143.0 (=C), 136.3 (=CH), 134.7 (=CH), 128.1 (=CH), 128.0 (=CH), 127.0 (=CH), 122.1 (=CH), 121.7 (=CH), 118.3 (=CH<sub>2</sub>), 71.0 (NC), 44.0 (CH<sub>2</sub>), 34.9 (CH<sub>3</sub>), 27.4 (NCH<sub>3</sub>).  $[\alpha]_D^{20}$  = -36 ( $c$  = 1.00; CHCl<sub>3</sub>). **IR** (film, cm<sup>-1</sup>):  $\nu_{\max}$  = 3345, 3060, 2925, 1635, 1218, 1081. **HRMS** (ESI<sup>+</sup>):  $m/z$  calcd for C<sub>18</sub>H<sub>21</sub>N<sub>3</sub>ONa [M+Na]<sup>+</sup> 318.1577, found 318.1577.

**1-[(4-Methoxyphenyl)methyl]-3-methyl-1-[(1R)-1-phenyl-1-(pyridin-2-yl)ethyl]urea (**15a**)**

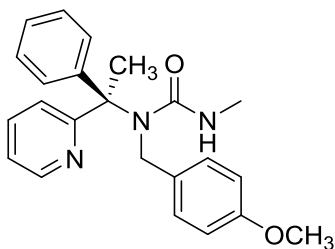

Following General procedure 3, LDA (0.48 ml), urea **10a** (145 mg, 0.39 mmol) and THF (3.86 ml) gave, after purification by flash column chromatography (SiO<sub>2</sub>, 99:1 to 90:10 DCM:MeOH), **15a** as an oil (138 mg, 95%). <sup>1</sup>H NMR (400 MHz, CDCl<sub>3</sub>) δ = 8.62-8.50 (1H, m, =CH), 7.59 (1H, td, *J* = 7.9 and 1.8, =CH), 7.35-7.18 (8H, m, 8 x =CH), 7.15 (1H, ddd, *J* = 7.4, 4.9 and 0.7, =CH), 6.89-6.79 (2H, m, 2 x =CH), 5.42-5.26 (1H, m, NHCH<sub>3</sub>), 4.77 (1H, d, *J* = 17.0, NCH<sub>A</sub>H<sub>B</sub>), 4.49 (1H, d, *J* = 17.1, NCH<sub>A</sub>H<sub>B</sub>), 3.81 (3H, s, OCH<sub>3</sub>), 2.51 (3H, d, *J* = 4.6, NHCH<sub>3</sub>), 2.04 (3H, s, CH<sub>3</sub>). <sup>13</sup>C NMR (100 MHz, CDCl<sub>3</sub>) δ = 164.4 (C=O), 160.7 (=C), 158.5 (=C), 148.2 (=CH), 145.1 (=C), 136.5 (=CH), 132.7 (=C), 128.2 (=CH), 128.1 (=CH), 127.4 (2 x =CH), 127.0 (=CH), 122.2 (=CH), 121.8 (=CH), 114.0 (=CH), 69.2 (NC), 55.4 (OCH<sub>3</sub>), 49.7 (CH<sub>2</sub>), 30.8 (NCH<sub>3</sub>), 27.5 (CH<sub>3</sub>). [α]<sub>D</sub><sup>20</sup> = -44 (c = 1.00; CHCl<sub>3</sub>). IR (film, cm<sup>-1</sup>): ν<sub>max</sub> = 2990, 2937, 1641. HRMS (ESI<sup>+</sup>): *m/z* calcd for C<sub>23</sub>H<sub>26</sub>N<sub>3</sub>O<sub>2</sub> [M+H]<sup>+</sup> 376.2025, found 376.2025.

**1-[(4-Methoxyphenyl)methyl]-3-methyl-1-[(1R)-1-(4-methylphenyl)-1-(pyridin-2-yl)ethyl]urea (**15b**)**

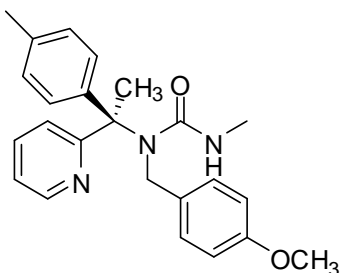

Following general procedure 3, LDA (0.14 ml), urea **10b** (45 mg, 0.12 mmol) and THF (1.16 ml) gave, after purification by flash column chromatography (SiO<sub>2</sub>, 99:1 to 90:10 DCM:MeOH), **15b** as an oil (44 mg, 98%). <sup>1</sup>H NMR (400 MHz, CDCl<sub>3</sub>) δ = 8.55 (1H, ddd, *J* = 4.8, 1.9 and 0.7, =CH), 7.58 (1H, td, *J* = 7.7 and 1.8, =CH), 7.33-7.27 (3H, m, 3 x =CH), 7.16-7.11 (3H, m, 3 x =CH), 7.10-7.04 (2H, m, 2 x =CH), 6.89-6.81 (2H, m, 2 x =CH), 5.18 (1H, q, *J* = 4.6, NHCH<sub>3</sub>), 4.76 (1H, d, *J* = 17.0, NCH<sub>A</sub>H<sub>B</sub>), 4.47 (1H, d, *J* = 17.0, NCH<sub>A</sub>H<sub>B</sub>), 3.80 (3H, s, OCH<sub>3</sub>), 2.51 (3H, d, *J* = 4.6, NHCH<sub>3</sub>), 2.31 (3H, s, CH<sub>3</sub>), 2.03 (3H, s, CH<sub>3</sub>). <sup>13</sup>C NMR (100 MHz, CDCl<sub>3</sub>) δ = 164.6 (C=O), 160.7 (=C), 158.5 (=C), 148.2 (=CH), 141.9 (=C), 136.7 (=CH), 136.4 (=C), 132.8 (=C), 128.9 (=CH), 128.2 (=CH), 127.4 (CH), 122.2 (=CH), 121.7 (=CH), 114.0 (=CH), 69.1 (NC), 55.4 (OCH<sub>3</sub>), 49.8 (CH<sub>2</sub>), 30.7 (NCH<sub>3</sub>), 27.5 (CH<sub>3</sub>), 21.1 (CH<sub>3</sub>). [α]<sub>D</sub><sup>20</sup> = -48 (c = 1.00; CHCl<sub>3</sub>). IR (film, cm<sup>-1</sup>): ν<sub>max</sub> = 2924, 1641, 1243, 1034, 748. HRMS (ESI<sup>+</sup>): *m/z* calcd for C<sub>24</sub>H<sub>27</sub>N<sub>3</sub>O<sub>2</sub>Na [M+Na]<sup>+</sup> 412.1995, found 412.1994.

**1-[(1R)-1-(3-Methoxyphenyl)-1-(pyridin-2-yl)ethyl]-1-[(4-[methoxyphenyl)methyl]-3-methylurea (15c)**

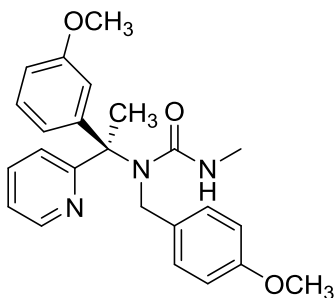

Following general procedure 3, LDA (0.19 ml), urea **10c** (63 mg, 0.16 mmol) and THF (1.55 ml) gave, after purification by flash column chromatography (SiO<sub>2</sub>, 99:1 to 90:10 DCM:MeOH), **15c** as an oil (64 mg, 98%). <sup>1</sup>H NMR (400 MHz, CDCl<sub>3</sub>)  $\delta$  = 8.57 (1H, dd,  $J$  = 4.7 and 0.9, =CH), 7.59 (1H, td,  $J$  = 7.9 and 1.8, =CH), 7.36-7.24 (3H, m, 3 x =CH), 7.18 (1H, t,  $J$  = 8.0, =CH), 7.14 (1H, dd,  $J$  = 7.4 and 5.5, =CH), 6.90-6.70 (5H, m, 5 x =CH), 5.37-5.22 (1H, brq, NHCH<sub>3</sub>), 4.69 (1H, d,  $J$  = 17.0, NCH<sub>A</sub>H<sub>B</sub>), 4.51 (1H, d,  $J$  = 17.1, NCH<sub>A</sub>H<sub>B</sub>), 3.80 (3H, s, OCH<sub>3</sub>), 3.70 (3H, s, OCH<sub>3</sub>), 2.53 (3H, d,  $J$  = 4.6, NHCH<sub>3</sub>), 2.06 (3H, s, CH<sub>3</sub>). <sup>13</sup>C NMR (100 MHz, CDCl<sub>3</sub>)  $\delta$  = 164.2 (C=O), 160.6 (=C), 159.4 (=C), 159.5 (=C), 148.3 (=CH), 147.0 (=C), 136.4 (=CH), 132.6 (=C), 129.1 (=CH), 128.1 (2 x =CH), 122.1 (=CH), 121.8 (=CH), 119.8 (=CH), 114.0 (2 x =CH), 113.7 (=CH), 112.1 (=CH), 69.3 (NC), 55.4 (OCH<sub>3</sub>), 55.2 (OCH<sub>3</sub>), 49.9 (CH<sub>2</sub>), 30.4 (NCH<sub>3</sub>), 27.5 (CH<sub>3</sub>). [ $\alpha$ ]<sub>D</sub><sup>20</sup> = -28 (c = 1.00; CHCl<sub>3</sub>). IR (film, cm<sup>-1</sup>):  $\nu_{\max}$  = 2957, 2924, 1670, 1250, 1034. HRMS (ESI<sup>+</sup>):  $m/z$  calcd for C<sub>24</sub>H<sub>28</sub>N<sub>3</sub>O<sub>3</sub> [M+ H]<sup>+</sup> 406.2125, found 406.2111.

**1-[(1R)-1-(4-Chlorophenyl)-1-(pyridin-2-yl)ethyl]-1-[(4-[methoxyphenyl)methyl]-3-methylurea (15d)**

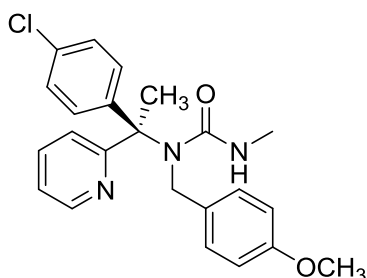

Following general procedure 3, LDA (0.13 ml), urea **10d** (41 mg, 0.10 mmol) and THF (1.00 ml) gave, after purification by flash column chromatography (SiO<sub>2</sub>, 99:1 to 90:10 DCM:MeOH), **15d** as an oil (35 mg, 85%). <sup>1</sup>H NMR (400 MHz, CDCl<sub>3</sub>)  $\delta$  = 8.55 (1H, ddd,  $J$  = 4.8, 1.9 and 0.9, =CH), 7.59 (1H, td,  $J$  = 7.6 and 1.9, =CH), 7.32-7.17 (7H, m, 7 x =CH), 7.15 (1H, ddd,  $J$  = 7.5, 4.8 and 0.8, =CH), 6.92-6.76 (2H, m, 2 x =CH), 5.34 (1H, q,  $J$  = 4.5, NHCH<sub>3</sub>), 4.76 (1H, d,  $J$  = 17.1, NCH<sub>A</sub>H<sub>B</sub>), 4.44 (1H, d,  $J$  = 17.1, NCH<sub>A</sub>H<sub>B</sub>), 3.80 (3H, s, OCH<sub>3</sub>), 2.53 (3H, d,  $J$  = 4.6, NHCH<sub>3</sub>), 2.01 (3H, s, CH<sub>3</sub>). <sup>13</sup>C NMR (100 MHz, CDCl<sub>3</sub>)  $\delta$  = 164.0 (C=O), 160.5 (=C), 158.7 (=C), 148.4 (=CH), 143.8 (=C), 136.6 (=CH), 132.7 (=C), 132.3 (=C), 128.9 (2 x =CH), 128.2 (2 x =CH), 128.1 (2 x =CH), 122.1 (=CH), 122.0 (=CH), 114.1 (2 x =CH), 68.8 (NC), 55.4 (OCH<sub>3</sub>), 49.7 (CH<sub>2</sub>), 30.5 (NCH<sub>3</sub>), 27.5 (CH<sub>3</sub>). [ $\alpha$ ]<sub>D</sub><sup>20</sup> = +16 (c = 1.00; CHCl<sub>3</sub>). IR (film, cm<sup>-1</sup>):  $\nu_{\max}$  = 2980, 1642, 1215, 1038, 747. HRMS (ESI<sup>+</sup>):  $m/z$  calcd for C<sub>23</sub>H<sub>24</sub>ClN<sub>3</sub>O<sub>2</sub>Na [M+Na]<sup>+</sup> 432.1449, found 432.1437.

**1-[(1R)-1-(3-Chlorophenyl)-1-(pyridin-2-yl)ethyl]-1-[(4-[methoxyphenyl)methyl]-3-methylurea (15e)**

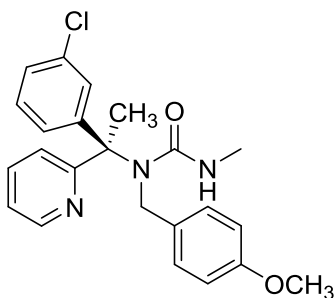

Following general procedure 3, LDA (0.21 ml), urea **10e** (70 mg, 0.17 mmol) and THF (1.71 ml) gave, after purification by flash column chromatography (SiO<sub>2</sub>, 99:1 to 90:10 DCM:MeOH), **15e** as an oil (67 mg, 96%). <sup>1</sup>H NMR (400 MHz, CDCl<sub>3</sub>)  $\delta$  = 8.62-8.51 (1H, m, =CH), 7.60 (1H, td, *J* = 7.9 and 1.7, =CH), 7.35-7.23 (8H, m, 8 x =CH), 6.90-6.80 (2H, m, 2 x =CH), 5.47-5.34 (1H, m, NHCH<sub>3</sub>), 4.76 (1H, d, *J* = 17.1, NCH<sub>A</sub>H<sub>B</sub>), 4.45 (1H, d, *J* = 17.1, NCH<sub>A</sub>H<sub>B</sub>), 3.80 (3H, s, OCH<sub>3</sub>), 2.53 (3H, d, *J* = 4.6, NHCH<sub>3</sub>), 2.01 (3H, m, CH<sub>3</sub>). <sup>13</sup>C NMR (100 MHz, CDCl<sub>3</sub>)  $\delta$  = 163.4 (C=O), 160.4 (=C), 158.6 (=C), 148.3 (=CH), 147.4 (=C), 136.7 (=CH), 134.0 (=C), 132.2 (=C), 129.4 (=CH), 128.1 (2 x =CH), 127.6 (=CH), 127.1 (=CH), 125.6 (=CH), 122.2 (=CH), 122.1 (=CH), 114.1 (2 x =CH), 68.9 (NC), 55.4 (OCH<sub>3</sub>), 49.7 (CH<sub>2</sub>), 30.5 (NCH<sub>3</sub>), 27.5 (CH<sub>3</sub>). [ $\alpha$ ]<sub>D</sub><sup>20</sup> = -53 (*c* = 1.00; CHCl<sub>3</sub>). IR (film, cm<sup>-1</sup>):  $\nu_{\max}$  = 2985, 1653, 1207, 1036, 751. HRMS (ESI<sup>+</sup>): *m/z* calcd for C<sub>23</sub>H<sub>25</sub>ClN<sub>3</sub>O<sub>2</sub> [M+H]<sup>+</sup> 410.1635, found 410.1637.

**1-[(1R)-1-(2-Chlorophenyl)-1-(pyridin-2-yl)ethyl]-1-[(4-[methoxyphenyl)methyl]-3-methylurea (15f)**

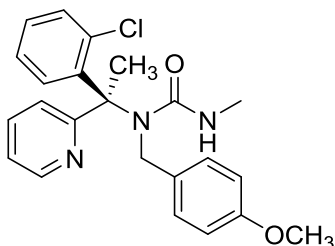

Following general procedure 3, LDA (0.23 ml), urea **10f** (74 mg, 0.18 mmol) and THF (1.81 ml) gave, after purification by flash column chromatography (SiO<sub>2</sub>, 99:1 to 90:10 DCM:MeOH), **15f** as an oil (49 mg, 66%). <sup>1</sup>H NMR (400 MHz, CDCl<sub>3</sub>)  $\delta$  = 8.56-8.38 (1H, m, =CH), 7.61-7.51 (1H, m, =CH), 7.38-7.31 (1H, m, =CH), 7.27-7.17 (6H, m, 6 x =CH), 7.16-7.10 (1H, m, =CH), 6.87-6.71 (2H, m, 2 x =CH), 6.23-6.02 (1H, m, NHCH<sub>3</sub>), 5.11 (1H, d, *J* = 16.9, NCH<sub>A</sub>H<sub>B</sub>), 4.45 (1H, d, *J* = 16.9, NCH<sub>A</sub>H<sub>B</sub>), 3.80-3.75 (3H, m, OCH<sub>3</sub>), 2.59-2.46 (3H, m, NHCH<sub>3</sub>), 2.21-2.07 (3H, m, CH<sub>3</sub>). <sup>13</sup>C NMR (100 MHz, CDCl<sub>3</sub>)  $\delta$  = 162.5 (C=O), 160.4 (=C), 158.4 (=C), 147.2 (=CH), 141.9 (=C), 136.7 (=CH), 132.9 (=C), 132.8 (=C), 132.0 (=CH), 129.0 (=CH), 128.3 (=CH), 128.2 (2 x =CH), 126.7 (=CH), 122.9 (=CH), 122.2 (=CH), 113.9 (2 x =CH), 69.4 (NC), 55.4 (OCH<sub>3</sub>), 49.3 (CH<sub>2</sub>), 27.4 (NCH<sub>3</sub>), 27.3 (CH<sub>3</sub>). [ $\alpha$ ]<sub>D</sub><sup>20</sup> = -28 (*c* = 1.00; CHCl<sub>3</sub>). IR (film, cm<sup>-1</sup>):  $\nu_{\max}$  = 3017, 1628, 1215, 1035, 745. HRMS (ESI<sup>+</sup>): *m/z* calcd for C<sub>23</sub>H<sub>24</sub>ClN<sub>3</sub>O<sub>2</sub>Na [M+Na]<sup>+</sup> 432.1449, found 432.1447.

**1-[(1R)-1-(4-Cyanophenyl)-1-(pyridin-2-yl)ethyl]-1-[(4-[methoxyphenyl)methyl]-3-methylurea (15g)**

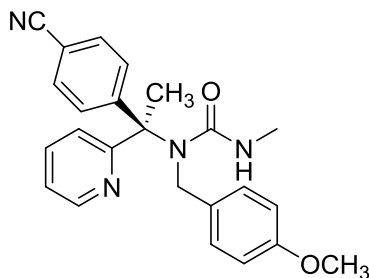

Following general procedure 3, LDA (0.24 ml), urea **10g** (78 mg, 0.20 mmol) and THF (1.95 ml) gave, after purification by flash column chromatography (SiO<sub>2</sub>, 99:1 to 90:10 DCM:MeOH), **15g** as an oil (66 mg, 85%). <sup>1</sup>H NMR (400 MHz, CDCl<sub>3</sub>)  $\delta$  = 8.57 (1H, ddd,  $J$  = 4.8, 1.9 and 0.9, =CH), 7.55 (1H, ddd,  $J$  = 9.4, 7.5 and 1.9, =CH), 7.58-7.53 (2H, m, 2 x =CH), 7.41-7.35 (2H, m, 2 x =CH), 7.32-7.26 (3H, m, 3 x =CH), 7.18 (1H, ddd,  $J$  = 7.5, 4.8 and 1.0, =CH), 6.89-6.83 (2H, m, 2 x =CH), 5.46 (1H, q,  $J$  = 4.3, NHCH<sub>3</sub>), 4.73 (1H, d,  $J$  = 17.3, NCH<sub>A</sub>H<sub>B</sub>), 4.42 (1H, d,  $J$  = 17.3, NCH<sub>A</sub>H<sub>B</sub>), 3.81 (3H, s, OCH<sub>3</sub>), 2.53 (3H, d,  $J$  = 4.6, NHCH<sub>3</sub>), 2.01 (3H, s, CH<sub>3</sub>). <sup>13</sup>C NMR (100 MHz, CDCl<sub>3</sub>)  $\delta$  = 162.9 (C=O), 160.3 (=C), 158.8 (=C), 151.4 (=C), 148.4 (=CH), 136.8 (=CH), 131.9 (2 x =CH), 131.7 (=C), 128.0 (2 x =CH), 127.9 (2 x =CH), 122.4 (=CH), 122.3 (=CH), 119.1 (=C), 114.3 (2 x =CH), 110.4 (CN), 69.1 (NC), 55.5 (OCH<sub>3</sub>), 49.7 (CH<sub>2</sub>), 30.1 (NCH<sub>3</sub>), 27.4 (CH<sub>3</sub>).  $[\alpha]_D^{20}$  = -56 ( $c$  = 1.00; CHCl<sub>3</sub>). IR (film, cm<sup>-1</sup>):  $\nu_{\max}$  = 2999, 2227, 1647, 1244, 1033, 749. HRMS (ESI<sup>+</sup>):  $m/z$  calcd for C<sub>24</sub>H<sub>24</sub>N<sub>4</sub>O<sub>2</sub>Na [M+Na]<sup>+</sup> 423.1791, found 423.1793.

**1-[(4-Methoxyphenyl)methyl]-3-methyl-1-[(1R)-1-phenyl-1-(pyridin-2-yl)but-3-en-1-yl]urea (15h)**

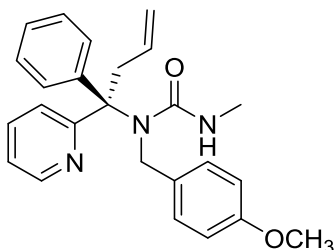

Following general procedure 3, LDA (0.24 ml), urea **10h** (77 mg, 0.19 mmol) and THF (1.92 ml) gave, after purification by flash column chromatography (SiO<sub>2</sub>, 99:1 to 90:10 DCM:MeOH), **15h** as an oil (70 mg, 91%). <sup>1</sup>H NMR (400 MHz, CDCl<sub>3</sub>)  $\delta$  = 8.58-8.50 (1H, m, =CH), 7.54 (1H, td,  $J$  = 8.0 and 1.9, =CH), 7.34-7.29 (1H, m, =CH), 7.28-7.15 (7H, m, 7 x =CH), 6.85-6.76 (2H, m, 2 x =CH), 7.22-7.16 (1H, m, =CH), 7.12 (1H, ddd,  $J$  = 7.4, 4.8 and 0.9, =CH), 5.76-5.67 (1H, m, NHCH<sub>3</sub>), 5.59 (1H, ddt,  $J$  = 17.1, 10.2 and 6.8, CH<sub>2</sub>=CHCH<sub>2</sub>), 5.03-4.87 (2H, m, =CH<sub>2</sub>) 3.80 (3H, s, OCH<sub>3</sub>), 3.49 (1H, dd,  $J$  = 14.5 and 6.8, CH<sub>A</sub>CH<sub>B</sub>CH=), 3.40 (1H, dd,  $J$  = 14.5 and 7.5, CH<sub>A</sub>CH<sub>B</sub>CH=), 2.52 (3H, d,  $J$  = 4.6, NHCH<sub>3</sub>). <sup>13</sup>C NMR (100 MHz, CDCl<sub>3</sub>)  $\delta$  = 163.3 (C=O), 160.6 (=C), 158.5 (=C), 148.1 (=CH), 143.1 (=C), 136.1 (=CH), 134.8 (=CH), 132.4 (=C), 128.1 (2 x =CH), 128.0 (2 x =CH), 127.8 (2 x =CH), 126.9 (=CH), 122.7 (=CH), 121.7 (=CH), 118.3 (=CH<sub>2</sub>), 114.0 (2 x =CH), 71.8 (NC), 55.4 (OCH<sub>3</sub>), 50.3 (CH<sub>2</sub>), 44.8 (CH<sub>2</sub>), 27.4 (NCH<sub>3</sub>).  $[\alpha]_D^{20}$  = -36 ( $c$  = 1.00; CHCl<sub>3</sub>). IR (film, cm<sup>-1</sup>):  $\nu_{\max}$  = 3441, 3064, 2930, 1645, 1244, 1036. HRMS (ESI<sup>+</sup>):  $m/z$  calcd for C<sub>25</sub>H<sub>28</sub>N<sub>3</sub>O<sub>2</sub> [M+H]<sup>+</sup> 402.2182, found 402.2174.

**[(4-[Methoxyphenyl)methyl][(1R)-1-phenyl-1-(pyridin-2-yl)ethyl]amine (16a)**

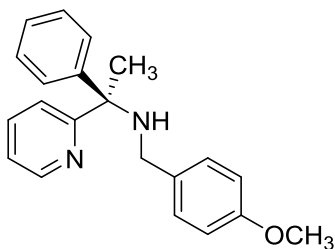

Following general procedure 4, urea **15a** (130 mg, 0.35 mmol) gave **16a** as an oil (100 mg, 91%).  $^1\text{H NMR}$  (400 MHz,  $\text{CDCl}_3$ )  $\delta$  = 8.61-8.53 (1H, m, =CH), 7.58 (1H, td,  $J$  = 7.8 and 1.9, =CH), 7.53-7.46 (2H, m, 2 x =CH), 7.35-7.29 (2H, m, 2 x =CH), 7.28-7.25 (3H, m, 3 x =CH), 7.25-7.19 (1H, m, =CH), 7.11 (1H, ddd,  $J$  = 7.5, 4.8 and 1.1, =CH), 6.92-6.78 (2H, m, 2 x =CH), 3.79 (3H, s,  $\text{OCH}_3$ ), 3.50 (2H, AB pattern,  $J$  = 12.2,  $\Delta\nu$  = 18.8,  $\text{NHCH}_2$ ), 2.95-2.21 (1H, brs,  $\text{NHCH}_2$ ), 1.95 (3H, s,  $\text{CH}_3$ ).  $^{13}\text{C NMR}$  (100 MHz,  $\text{CDCl}_3$ )  $\delta$  = 166.4 (=C), 158.6 (=C), 148.8 (=CH), 147.1 (=C), 136.3 (=CH), 133.6 (=C), 129.5 (2 x =CH), 128.3 (2 x =CH), 127.3 (2 x =CH), 126.7 (=CH), 121.7 (=CH), 121.5 (=CH), 113.9 (2 x =CH), 64.3 (NC), 55.4 ( $\text{OCH}_3$ ), 46.9 ( $\text{CH}_2$ ), 26.2 ( $\text{CH}_3$ ).  $[\alpha]_{\text{D}}^{20}$  = -49 ( $c$  = 1.00;  $\text{CHCl}_3$ ). IR (film,  $\text{cm}^{-1}$ ):  $\nu_{\text{max}}$  = 2.954, 2931, 1241. HRMS (ESI $^+$ ):  $m/z$  calcd for  $\text{C}_{21}\text{H}_{23}\text{N}_2\text{O}_1$   $[\text{M}+\text{H}]^+$  319.1805, found 319.1809.

**[(4-[Methoxyphenyl)methyl][(1R)-1-(4-methylphenyl)-1-(pyridin-2-yl)ethyl]amine (16b)**

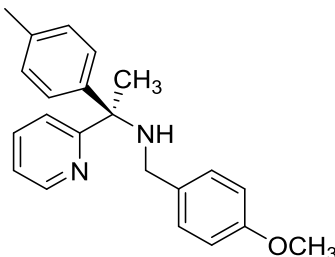

Following general procedure 4, urea **15b** (37 mg, 0.09 mmol) gave **16b** as an oil (28 mg, 90%).  $^1\text{H NMR}$  (400 MHz,  $\text{CDCl}_3$ )  $\delta$  = 8.63-8.50 (1H, m, =CH), 7.63-7.50 (1H, m, =CH), 7.42-7.32 (2H, m, 2 x =CH), 7.30-7.21 (3H, m, 3 x =CH), 7.17-7.03 (3H, m, 3 x =CH), 6.89-6.77 (2H, m, 2 x =CH), 3.79 (3H, s,  $\text{OCH}_3$ ), 3.50 (2H, AB pattern,  $J$  = 12.1,  $\Delta\nu$  = 12.6,  $\text{NHCH}_2$ ), 2.73-2.37 (1H, brs, NH), 2.32 (3H, s,  $\text{CH}_3$ ), 1.93 (3H, s,  $\text{CH}_3$ ).  $^{13}\text{C NMR}$  (100 MHz,  $\text{CDCl}_3$ )  $\delta$  = 166.4 (=C), 158.6 (=C), 148.7 (=CH), 143.9 (=C), 136.3 (=CH), 136.2 (=C), 133.5 (=C), 129.5 (2 x =CH), 129.0 (2 x =CH), 127.2 (2 x =CH), 121.6 (=CH), 121.5 (=CH), 113.8 (2 x =CH), 64.1 (NC), 55.4 ( $\text{OCH}_3$ ), 46.9 ( $\text{CH}_2$ ), 26.2 ( $\text{CH}_3$ ), 21.1 ( $\text{CH}_3$ ).  $[\alpha]_{\text{D}}^{20}$  = -24 ( $c$  = 1.00;  $\text{CHCl}_3$ ). IR (film,  $\text{cm}^{-1}$ ):  $\nu_{\text{max}}$  = 2926, 1246, 1036. HRMS (ESI $^+$ ):  $m/z$  calcd for  $\text{C}_{22}\text{H}_{25}\text{N}_2\text{O}$   $[\text{M}+\text{H}]^+$  333.1961, found 333.1961.

**[(1R)-1-(3-Methoxyphenyl)-1-(pyridin-2-yl)ethyl][(4-[methoxyphenyl)methyl]amine (16c)**

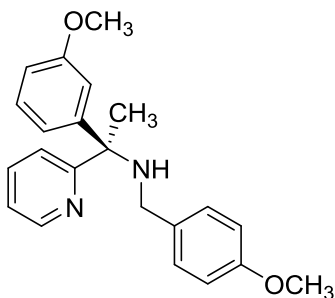

Following general procedure 4, urea **15c** (57 mg, 0.14 mmol) gave **16c** as an oil (28 mg, 90%). <sup>1</sup>H NMR (400 MHz, CDCl<sub>3</sub>)  $\delta$  = 8.61-8.54 (1H, m, =CH), 7.58 (1H, td,  $J$  = 7.9 and 1.8, =CH), 7.32-7.20 (4H, m, 4 x =CH), 7.15-7.10 (2H, m, 2 x =CH), 7.09-7.02 (1H, m, =CH), 6.89-6.82 (2H, m, 2 x =CH), 6.78 (1H, ddd,  $J$  = 7.1, 1.5 and 0.6, =CH), 3.80 (3H, s, OCH<sub>3</sub>), 3.78 (3H, s, OCH<sub>3</sub>), 3.51 (2H, AB pattern,  $J$  = 15.5,  $\Delta\nu$  = 18.4, NHCH<sub>2</sub>), 2.58-2.31 (1H, brs, NH), 1.94 (3H, s, CH<sub>3</sub>). <sup>13</sup>C NMR (100 MHz, CDCl<sub>3</sub>)  $\delta$  = 166.1 (=C), 159.6 (=C), 158.6 (=C), 148.8 (=C), 148.7 (=CH), 136.3 (=CH), 133.5 (=C), 129.5 (2 x =CH), 129.2 (=CH), 121.6 (=CH), 121.5 (=CH), 119.9 (=CH), 113.8 (2 x =CH), 113.5 (=CH), 111.8 (=CH), 64.2 (NC), 55.4 (OCH<sub>3</sub>), 55.3 (OCH<sub>3</sub>), 46.9 (CH<sub>2</sub>), 26.2 (CH<sub>3</sub>).  $[\alpha]_D^{20}$  = -9.4 ( $c$  = 1.00; CHCl<sub>3</sub>). IR (film, cm<sup>-1</sup>):  $\nu_{\max}$  = 3011, 2960, 1246, 1037. HRMS (ESI<sup>+</sup>):  $m/z$  calcd for C<sub>22</sub>H<sub>25</sub>N<sub>2</sub>O<sub>2</sub> [M+H]<sup>+</sup> 349.1911, found 349.1914.

**[(1R)-1-(4-Chlorophenyl)-1-(pyridin-2-yl)ethyl][(4-[methoxyphenyl)methyl]amine (16d)**

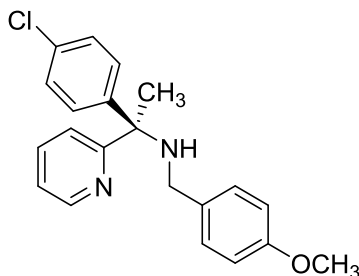

Following general procedure 4, urea **15d** (30 mg, 0.07 mmol) gave **16d** as an oil (25 mg, 97%). <sup>1</sup>H NMR (400 MHz, CDCl<sub>3</sub>)  $\delta$  = 8.65-8.50 (1H, m, =CH), 7.60 (1H, td,  $J$  = 7.6 and 1.4, =CH), 7.49-7.39 (2H, m, 2 x =CH), 7.30-7.22 (5H, m, 5 x =CH), 7.13 (1H, dd,  $J$  = 7.1 and 4.9, =CH), 6.92-6.76 (2H, m, 2 x =CH), 3.79 (3H, s, OCH<sub>3</sub>), 3.48 (2H, AB pattern,  $J$  = 12.1,  $\Delta\nu$  = 15.9, NHCH<sub>2</sub>), 2.71-2.40 (1H, brs, NH), 1.92 (3H, s, CH<sub>3</sub>). <sup>13</sup>C NMR (100 MHz, CDCl<sub>3</sub>)  $\delta$  = 165.8 (=C), 158.7 (=C), 149.0 (=CH), 145.7 (=C), 136.4 (=CH), 133.2 (=C), 132.5 (=C), 129.4 (2 x =CH), 128.8 (2 x =CH), 128.4 (2 x =CH), 121.7 (=CH), 121.4 (=CH), 113.9 (2 x =CH), 64.0 (NC), 55.4 (OCH<sub>3</sub>), 46.9 (CH<sub>2</sub>), 26.2 (CH<sub>3</sub>).  $[\alpha]_D^{20}$  = -48 ( $c$  = 1.00; CHCl<sub>3</sub>). IR (film, cm<sup>-1</sup>):  $\nu_{\max}$  = 3002, 2934, 1238, 1042, 767. HRMS (ESI<sup>+</sup>):  $m/z$  calcd for C<sub>21</sub>H<sub>22</sub>ClN<sub>2</sub>O [M+H]<sup>+</sup> 353.1415, found 353.1421.

**[(1R)-1-(2-Chlorophenyl)-1-(pyridin-2-yl)ethyl][(4-[methoxyphenyl)methyl]amine (16e)**

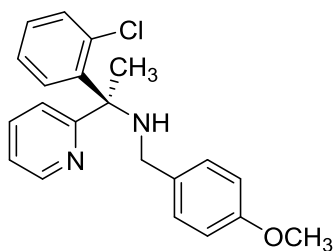

Following general procedure 4, urea **15f** (41 mg, 0.10 mmol) gave **16e** as an oil (32 mg, 91%). <sup>1</sup>H NMR (400 MHz, CDCl<sub>3</sub>)  $\delta$  = 8.56-8.46 (1H, m, =CH), 7.87 (1H, d,  $J$  = 7.9, =CH), 7.60 (1H, td,  $J$  = 8.0 and 1.7, =CH), 7.46 (1H, d,  $J$  = 8.0, =CH), 7.39-7.33 (1H, m, =CH), 7.32-7.28 (1H, m, =CH), 7.27-7.23 (1H, m, =CH), 7.22-7.16 (2H, m, 2 x =CH), 7.15-7.06 (1H, m, =CH), 6.89-6.75 (2H, m, 2 x =CH), 3.78 (3H, s, OCH<sub>3</sub>), 3.54 (1H, d,  $J$  = 12.0, NHCH<sub>A</sub>H<sub>B</sub>), 3.28 (1H, d,  $J$  = 12.0, NHCH<sub>A</sub>H<sub>B</sub>), 2.98-2.59 (1H, brs, NH), 1.91 (3H, s, CH<sub>3</sub>). <sup>13</sup>C NMR (100 MHz, CDCl<sub>3</sub>)  $\delta$  = 166.4 (=C), 158.7 (=C), 157.5 (=C), 148.7 (=CH), 146.2 (=C), 136.2 (=CH), 133.3 (=C), 131.5 (=CH), 129.6 (3 x =CH), 128.5 (=CH), 126.8 (=CH), 121.4 (=CH), 121.1 (=CH), 113.9 (2 x =CH), 65.3 (NC), 55.4 (OCH<sub>3</sub>), 47.1 (CH<sub>2</sub>), 26.7 (CH<sub>3</sub>).  $[\alpha]_D^{20}$  = -36 ( $c$  = 1.00; CHCl<sub>3</sub>). IR (film, cm<sup>-1</sup>):  $\nu_{\max}$  = 2929, 1245, 1034, 750. HRMS (ESI<sup>+</sup>):  $m/z$  calcd for C<sub>21</sub>H<sub>22</sub>ClN<sub>2</sub>O<sub>1</sub> [M+H]<sup>+</sup> 353.1415, found 353.1416.

**4-[(1R)-1-[(4-Methoxyphenyl)methyl]amino]-1-(pyridin-2-yl)ethyl]benzoic acid (16f)**

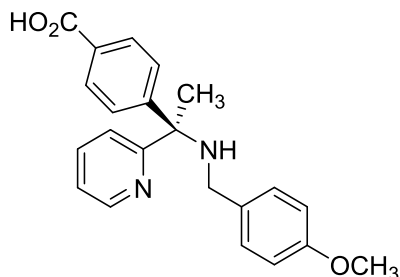

A solution of urea **15g** (62 mg, 0.16 mmol), aqueous NaOH (2.0 M) and EtOH (1.2 M) was microwaved at 130 °C for 3 h. The reaction mixture was concentrated and extracted with ethyl acetate. The aqueous phase was acidified with conc. HCl (pH = 1) and concentrated under reduced pressure. The amine **16f** was obtained by filtration on acidic Dowx ion exchange column (32 mg, 57%). <sup>1</sup>H NMR (400 MHz, MeOD)  $\delta$  = 8.78-8.66 (1H, m, =CH), 8.10-7.95 (2H, m, 2 x =CH), 7.84 (1H, td,  $J$  = 7.8 and 1.6, =CH), 7.58-7.48 (2H, m, 2 x =CH), 7.46-7.38 (1H, m, =CH), 7.36-7.29 (2H, m, 2 x =CH), 7.27 (1H, d,  $J$  = 8.1, =CH), 6.98-6.87 (2H, m, 2 x =CH), 3.83 (2H, s, NHCH<sub>2</sub>), 3.79 (3H, s, OCH<sub>3</sub>), 2.18 (3H, s, CH<sub>3</sub>). <sup>13</sup>C NMR (100 MHz, MeOD)  $\delta$  = 164.3 (=C), 164.1 (=C), 159.1 (=C), 151.9 (=CH), 145.5 (=C), 141.5 (=CH), 140.3 (=C), 134.9 (2 x =CH), 133.5 (2 x =CH), 131.3 (2 x =CH), 128.7 (=C), 127.1 (=CH), 126.0 (=CH), 117.8 (2 x =CH), 70.9 (NC), 58.3 (OCH<sub>3</sub>), 50.7 (CH<sub>2</sub>), 26.8 (CH<sub>3</sub>).  $[\alpha]_D^{20}$  = -68 ( $c$  = 1.00; MeOH). IR (film, cm<sup>-1</sup>):  $\nu_{\max}$  = 3317, 2947, 2834, 1652, 1253. HRMS (ESI<sup>+</sup>):  $m/z$  calcd for C<sub>22</sub>H<sub>23</sub>N<sub>2</sub>O<sub>3</sub> [M+H]<sup>+</sup> 363.1703, found 363.1699.

## React-IR experiments pictures

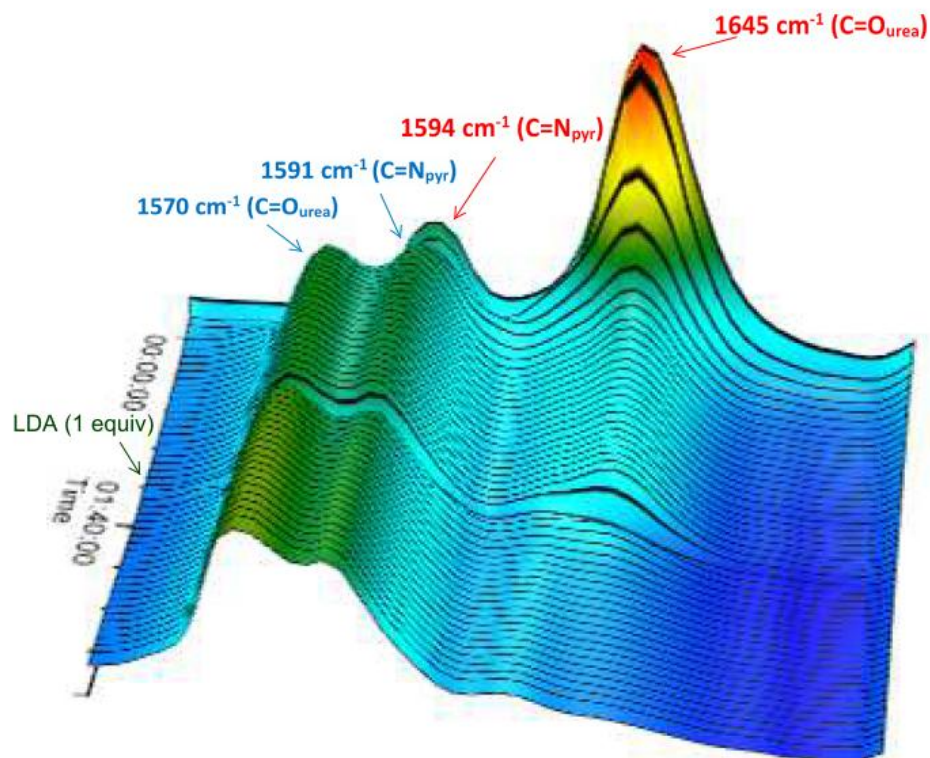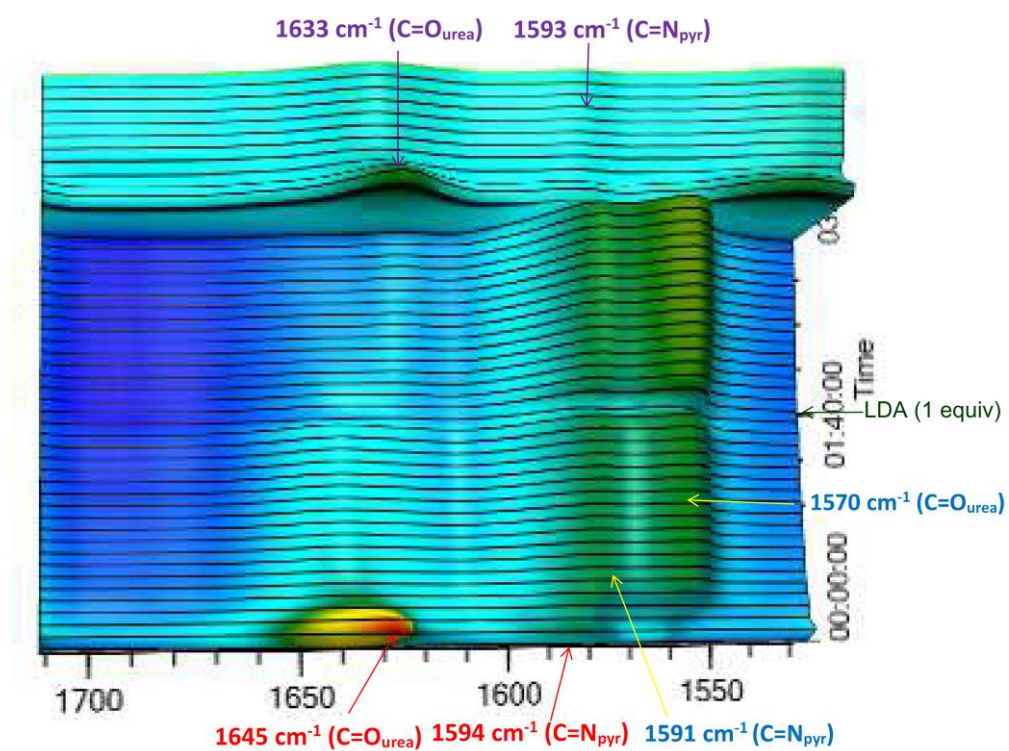

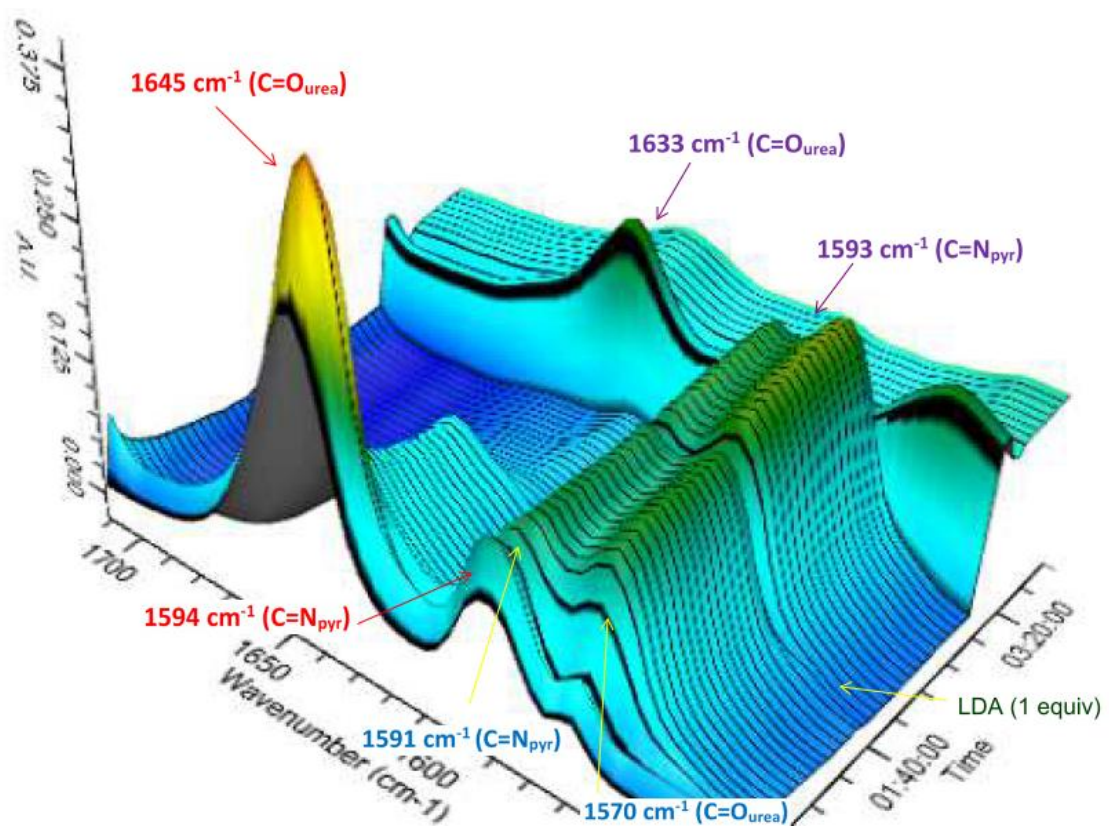

**NMR**  
**(*R<sub>S</sub>*,*R*)-3b**

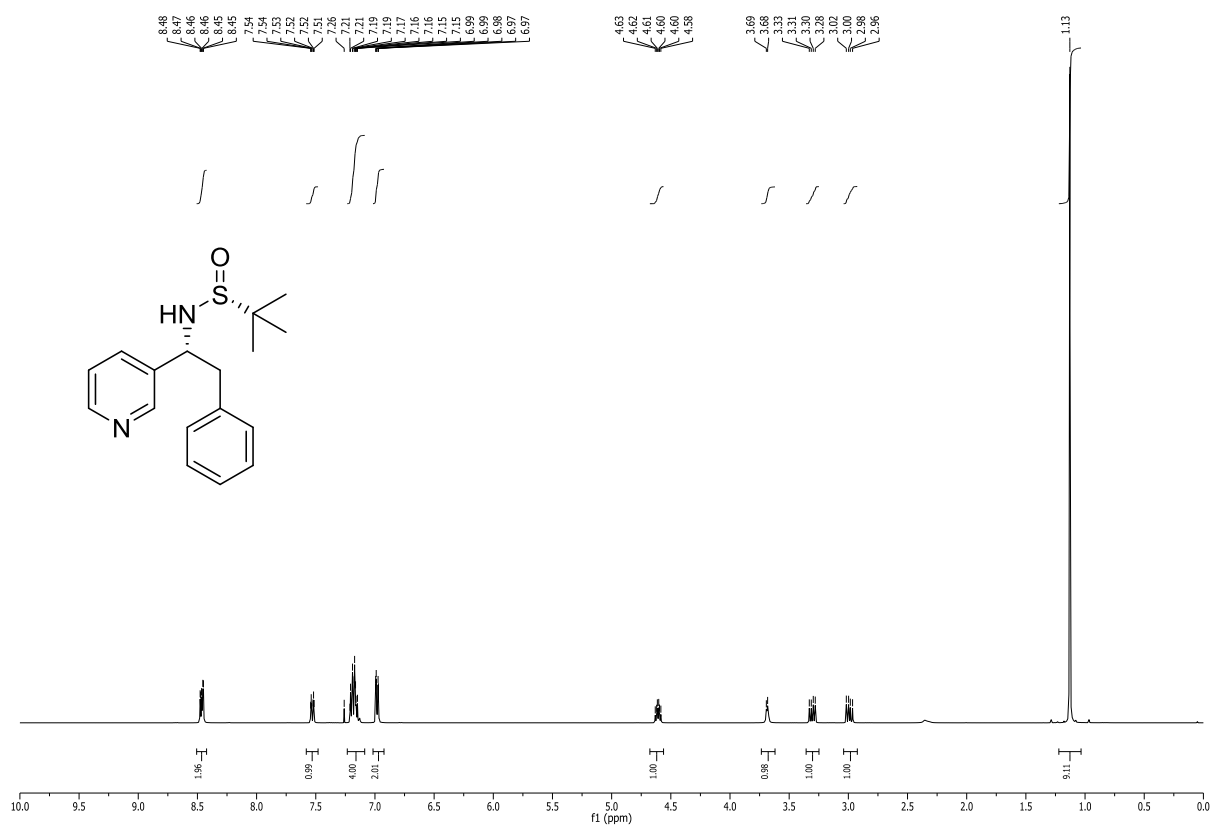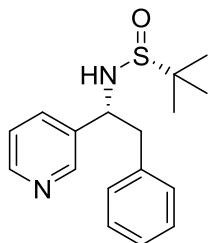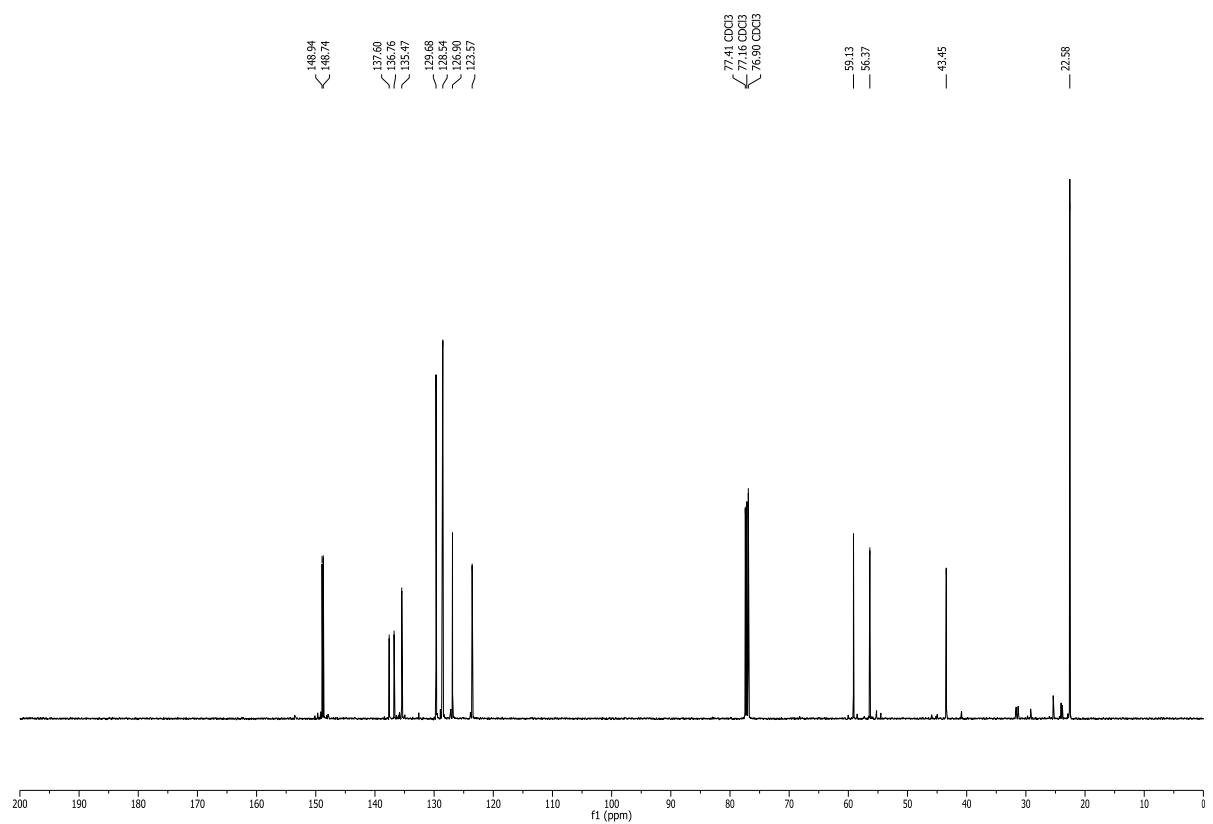

(*R,S*)-**3b**

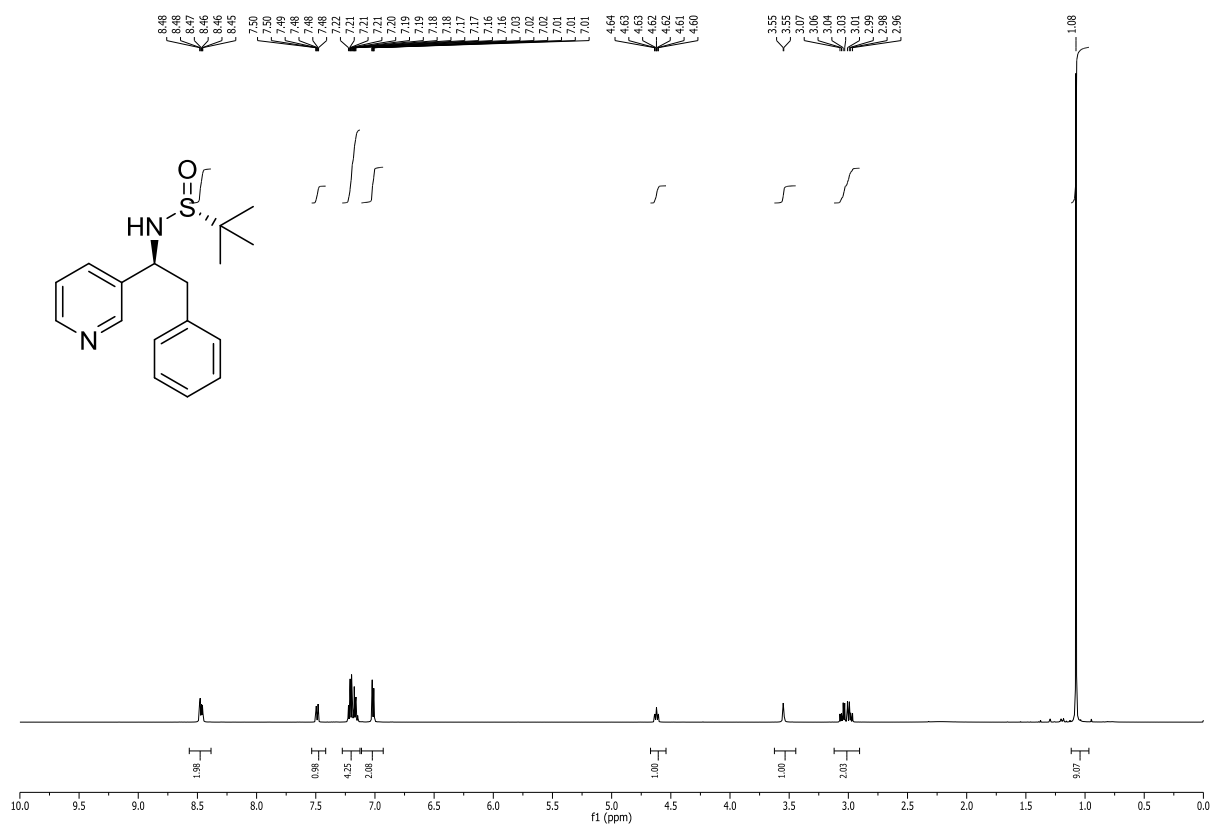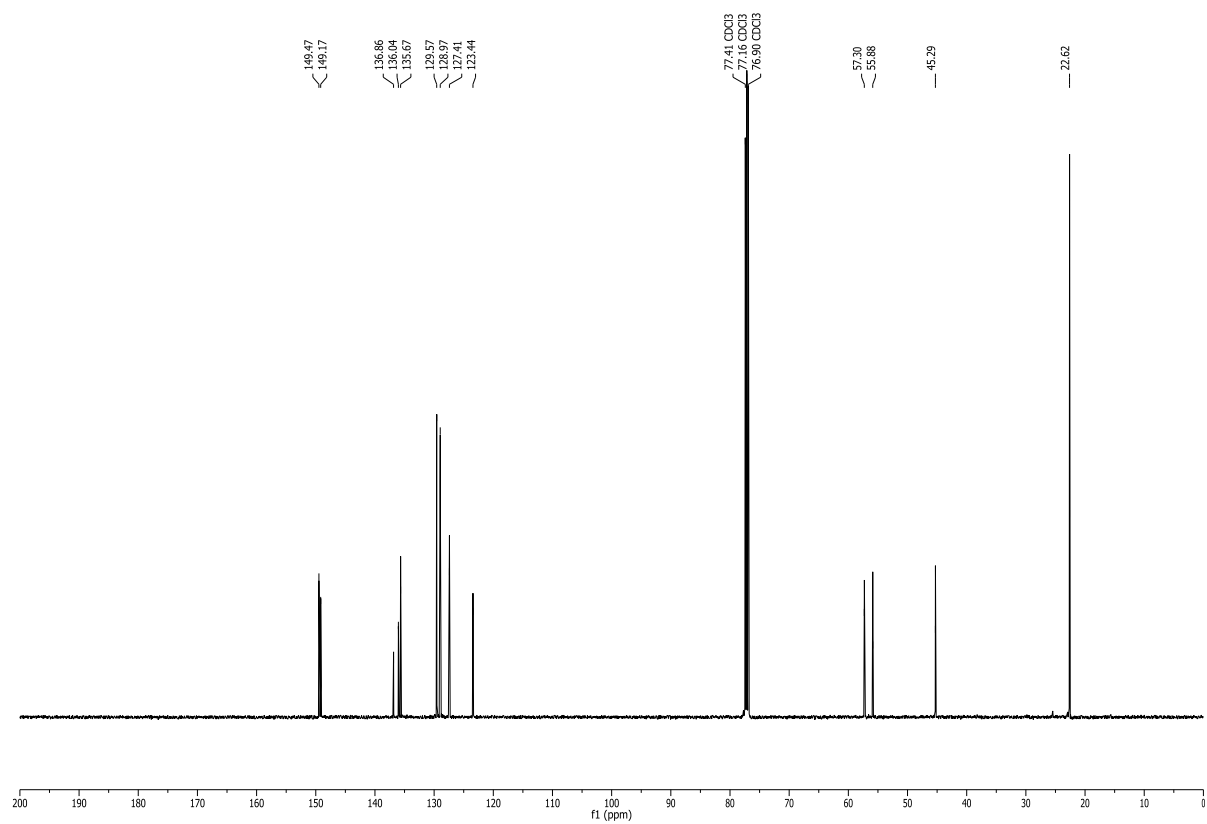

5a

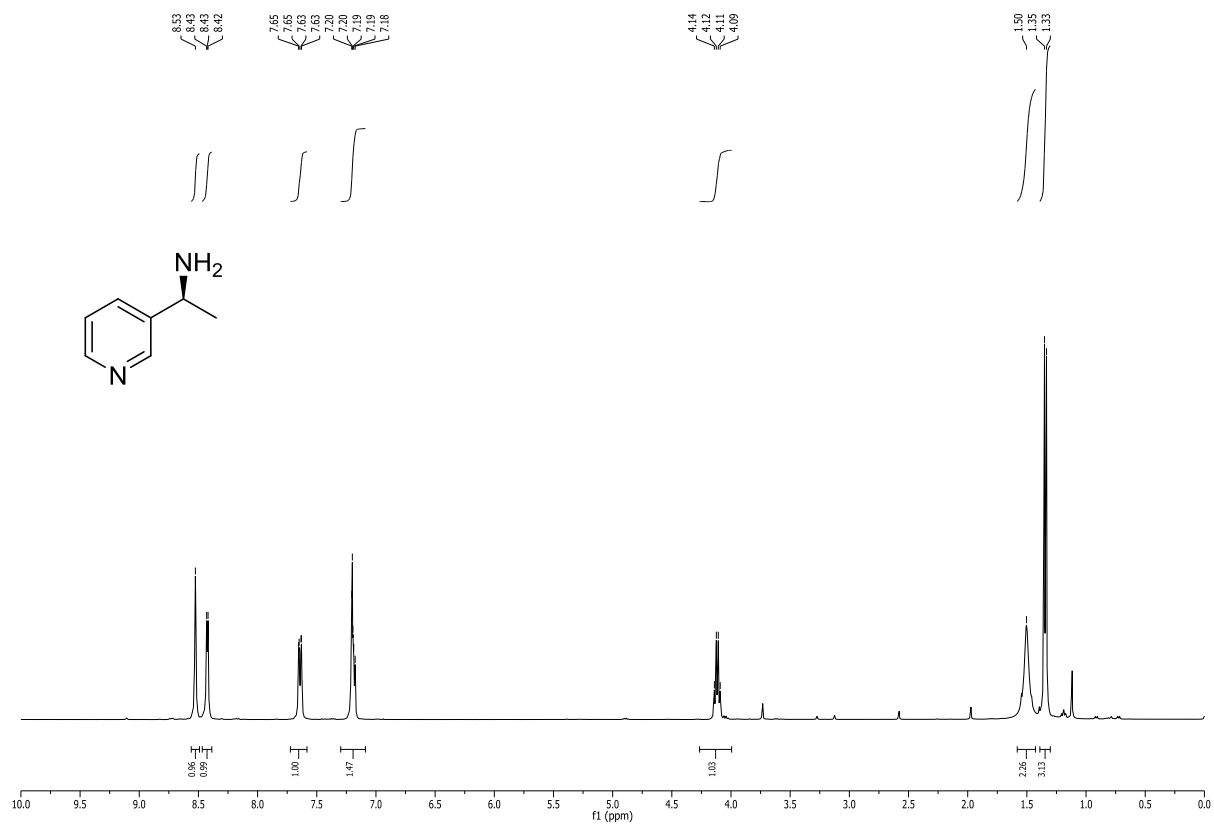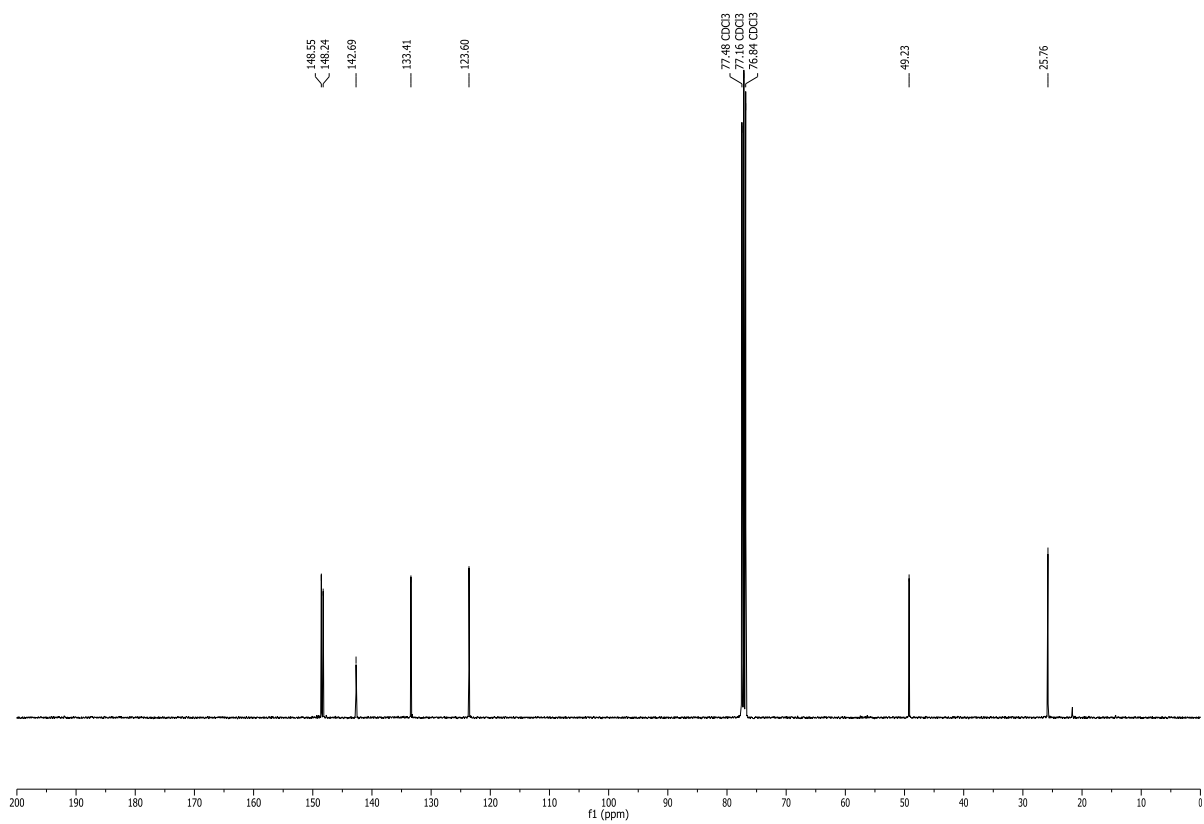

5b

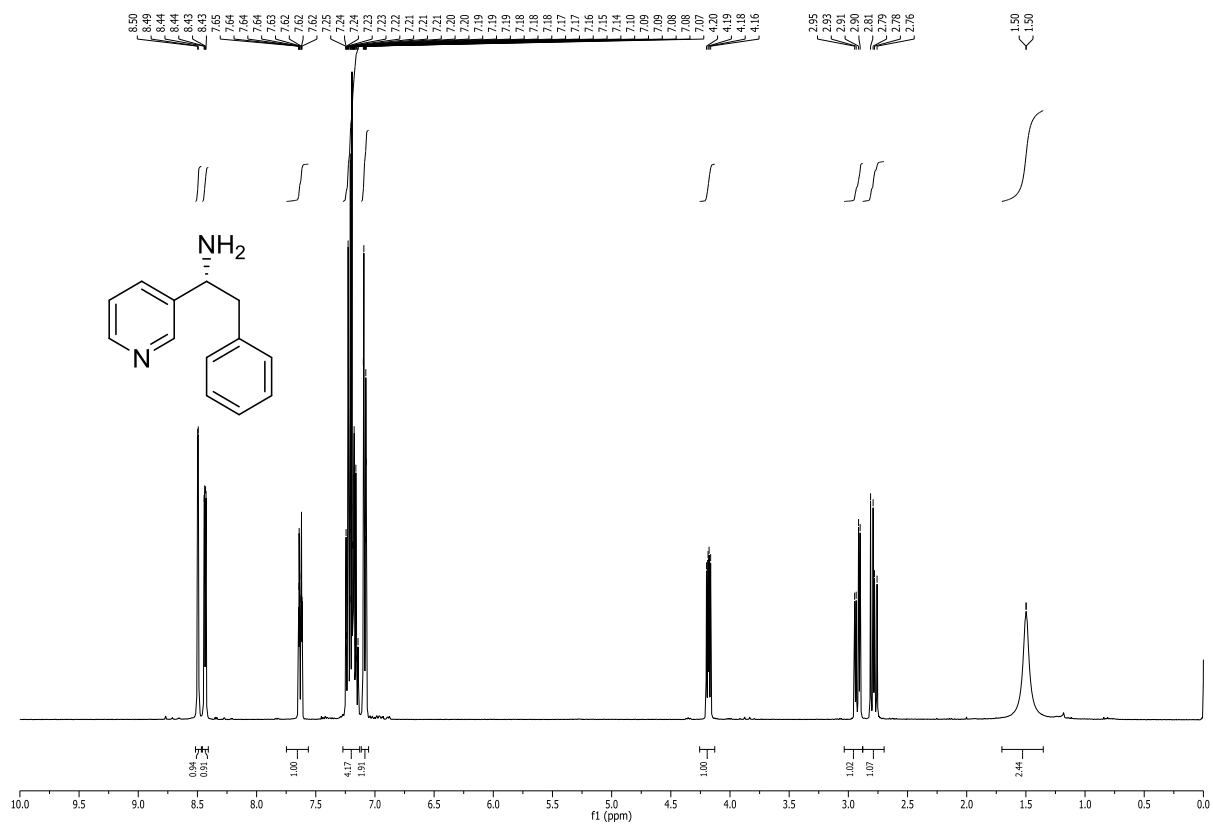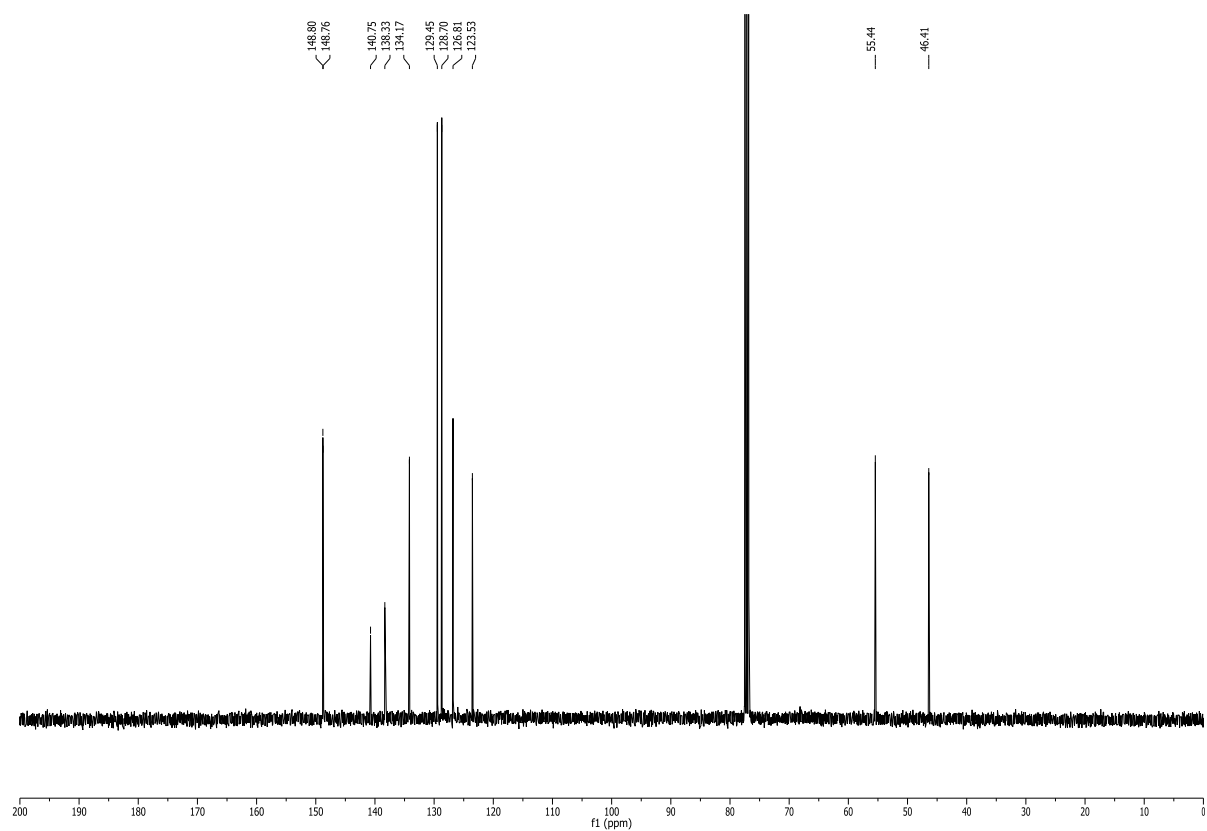

5c

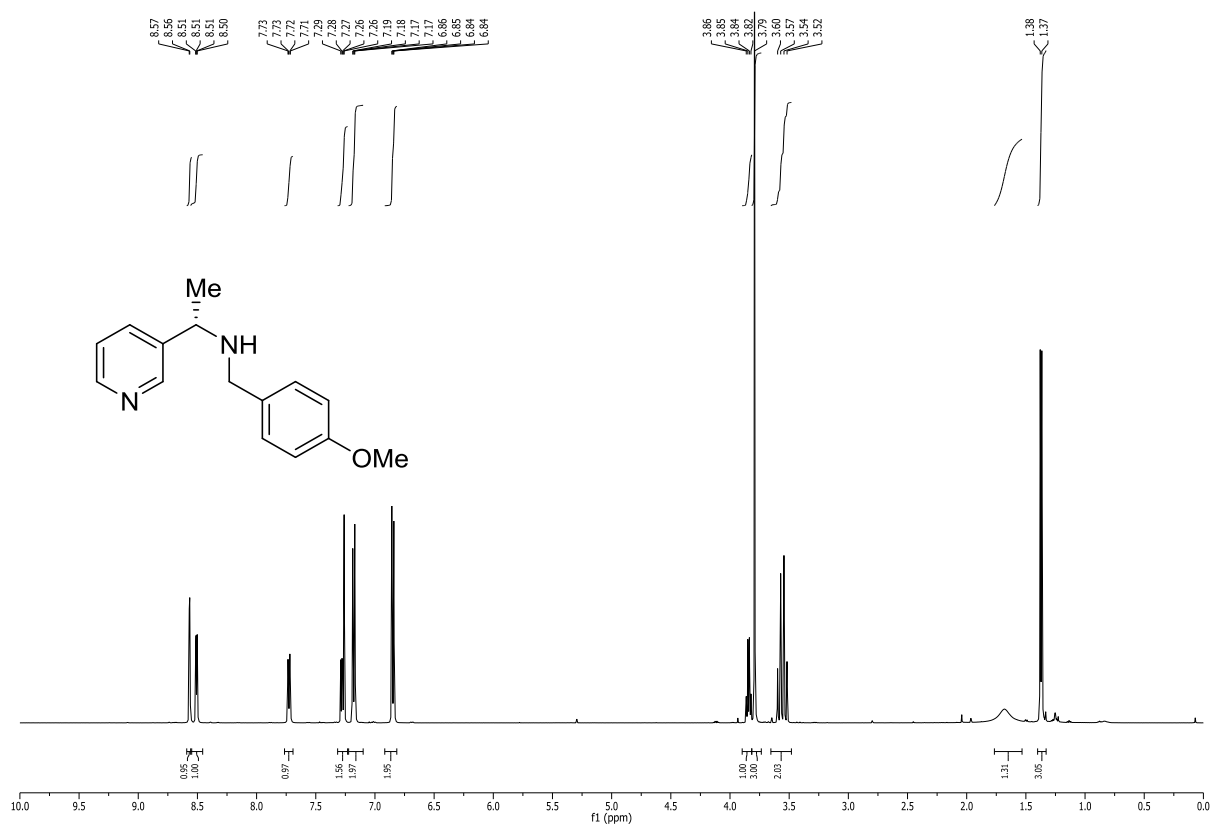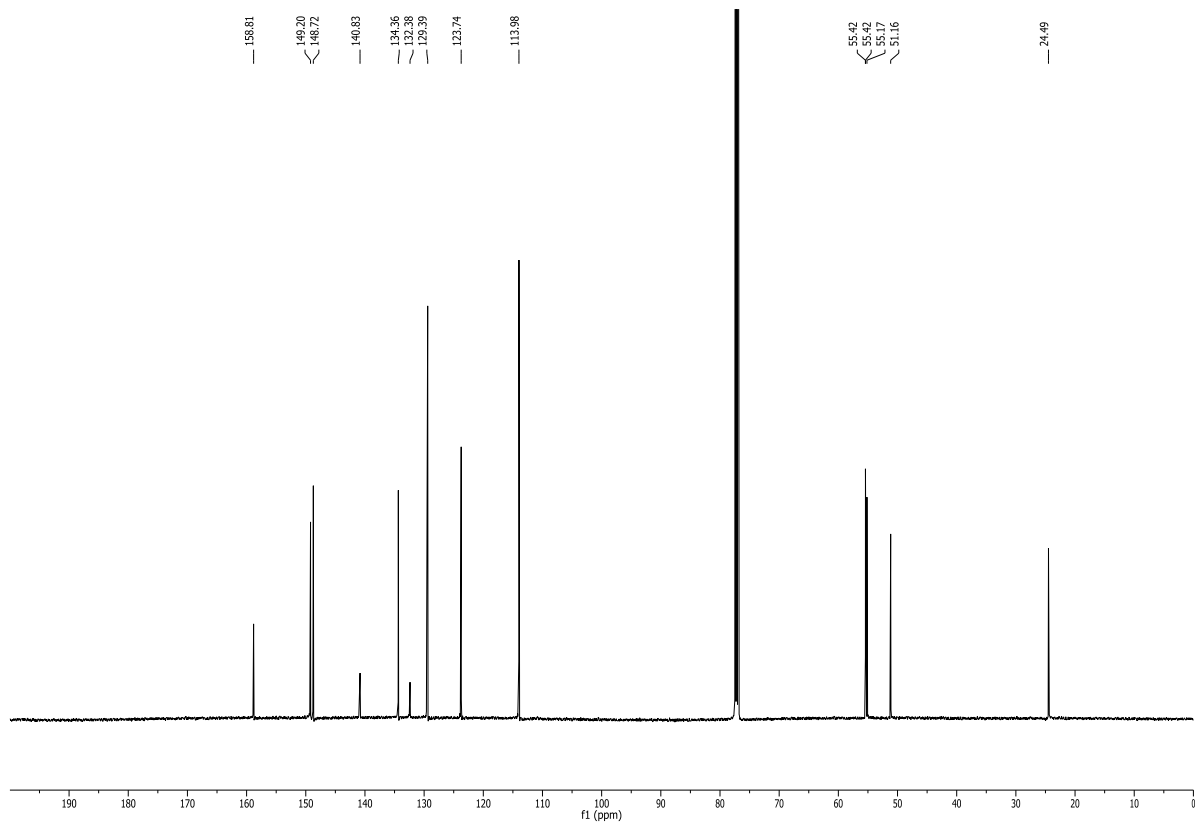

6d

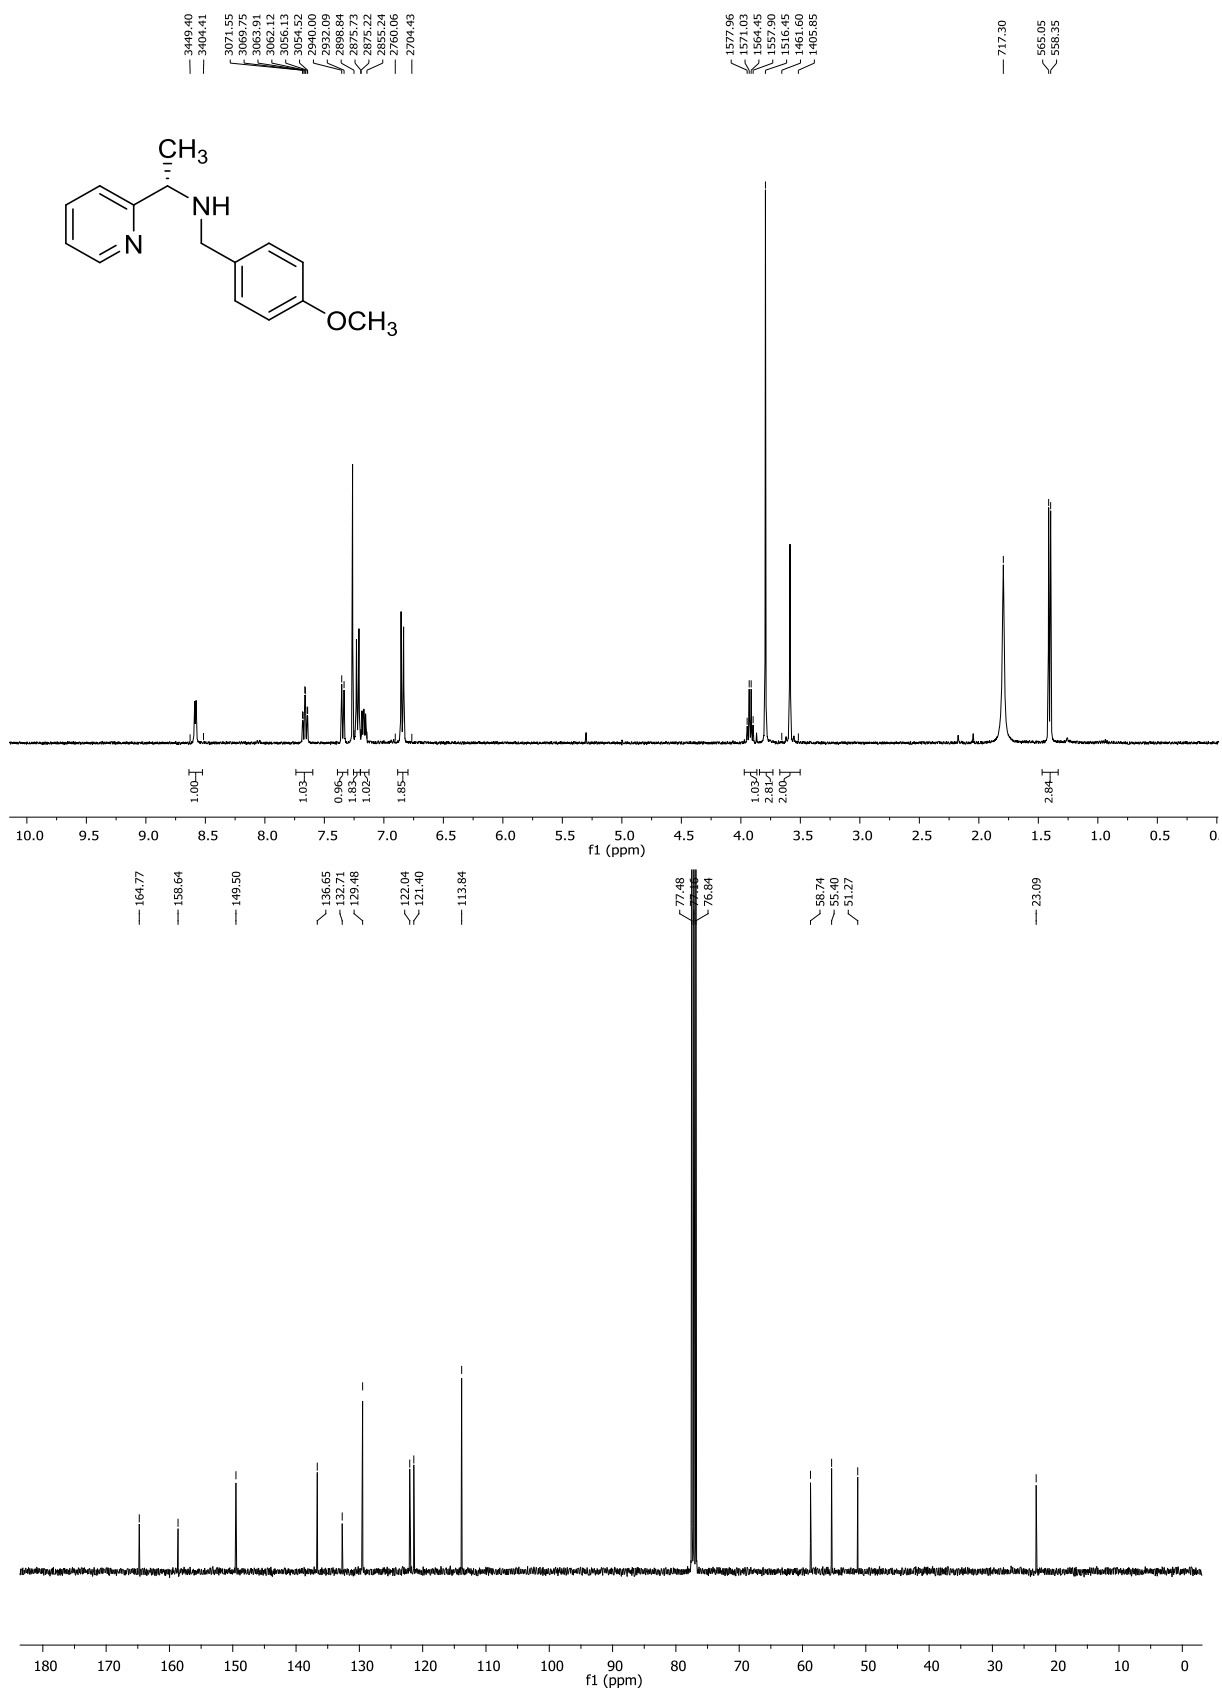

6e

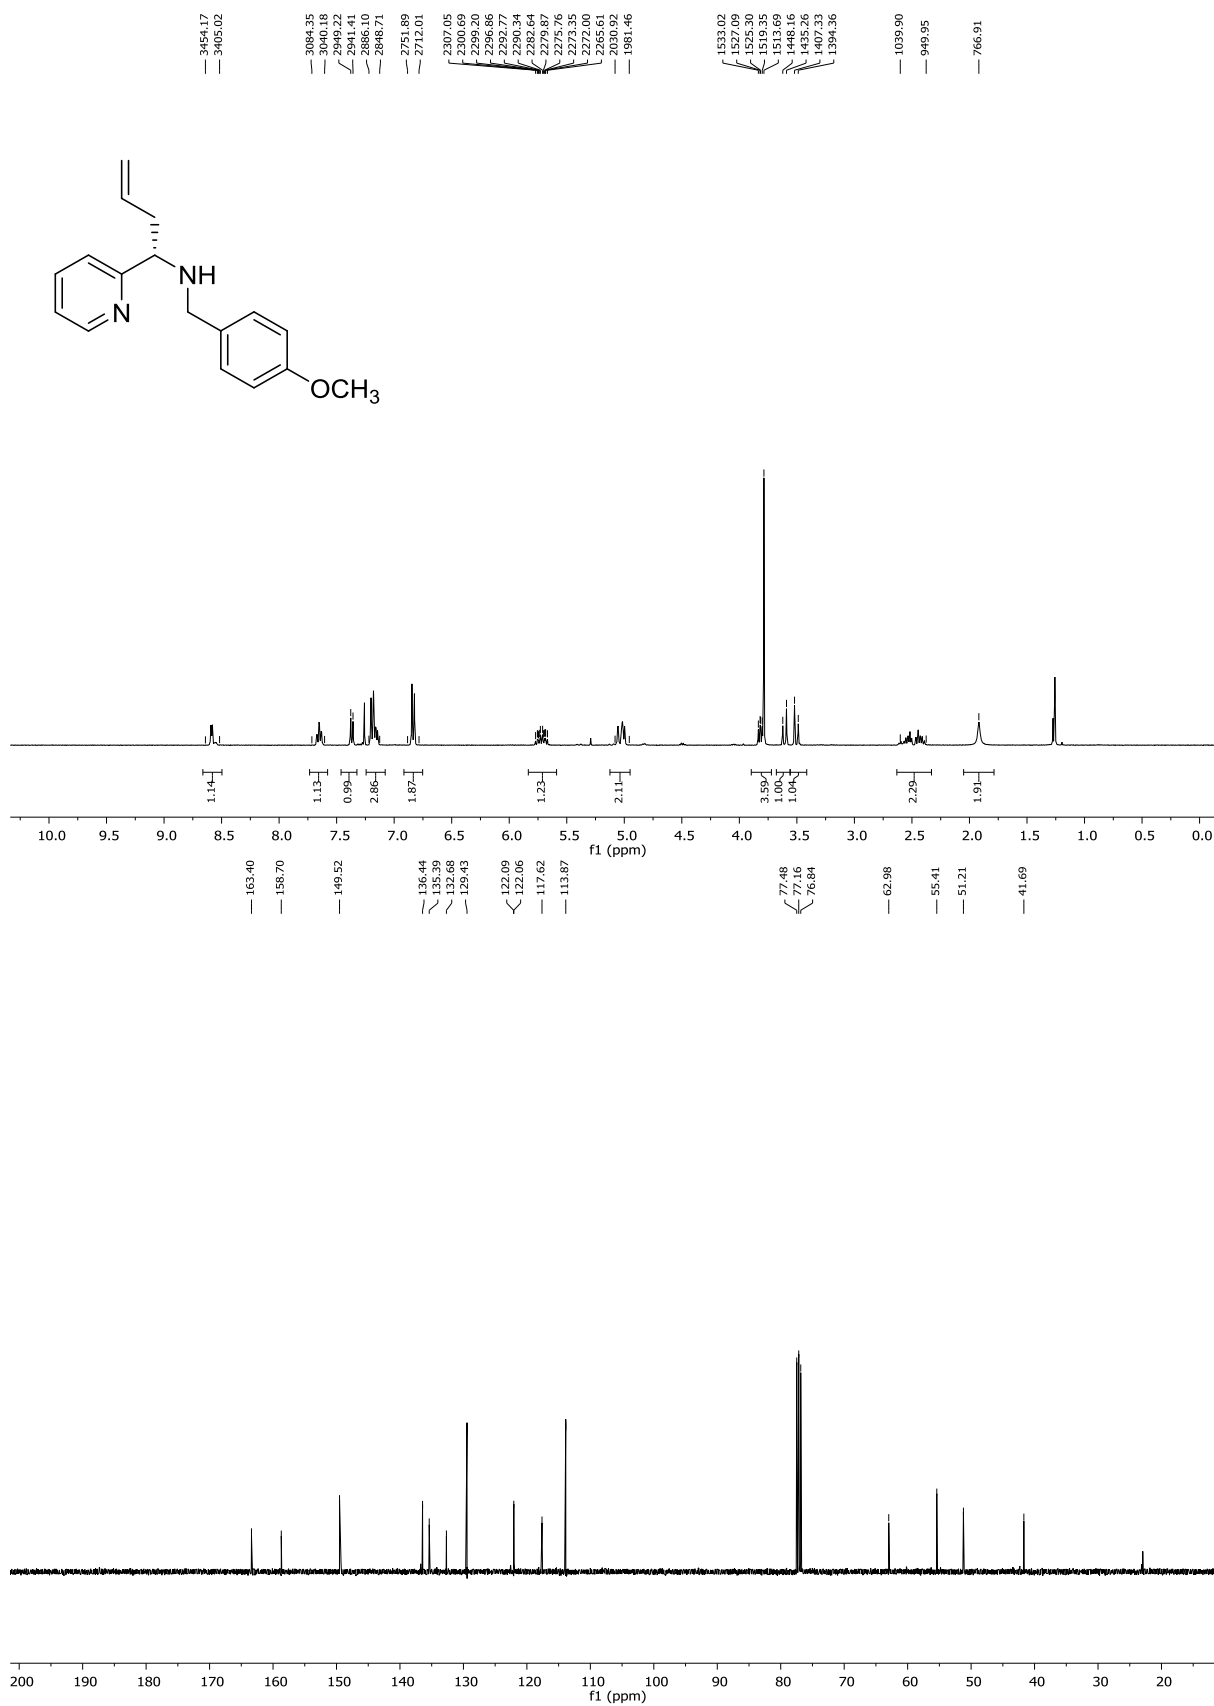

CN(C)C(c1cccnc1)C(=O)Nc2ccccc2

Chemical structure: (S)-1-(4-pyridyl)-N-methyl-2-phenylpropan-1-amine

<sup>1</sup>H NMR spectrum (CDCl<sub>3</sub>) showing peaks and integrations:

| Chemical Shift (ppm)                                                                                                                                                                                       | Integration                        |
|------------------------------------------------------------------------------------------------------------------------------------------------------------------------------------------------------------|------------------------------------|
| 8.51, 8.50, 8.48, 8.47, 8.46                                                                                                                                                                               | 0.89, 0.86                         |
| 7.53, 7.47, 7.45, 7.43, 7.42, 7.33, 7.27, 7.26, 7.25, 7.24, 7.23, 7.22, 7.21, 7.20, 7.19, 7.18, 7.17, 7.16, 7.15, 7.14, 7.13, 7.12, 7.11, 7.10, 7.09, 7.08, 7.07, 7.06, 7.05, 7.04, 7.03, 7.02, 7.01, 7.00 | 0.93, 1.88, 1.86, 3.77, 1.86, 0.94 |
| 5.04, 5.03, 5.01                                                                                                                                                                                           | 0.95                               |
| 4.55, 4.53                                                                                                                                                                                                 | 0.91                               |
| 3.25                                                                                                                                                                                                       | 2.87                               |
| 1.37, 1.35                                                                                                                                                                                                 | 3.00                               |

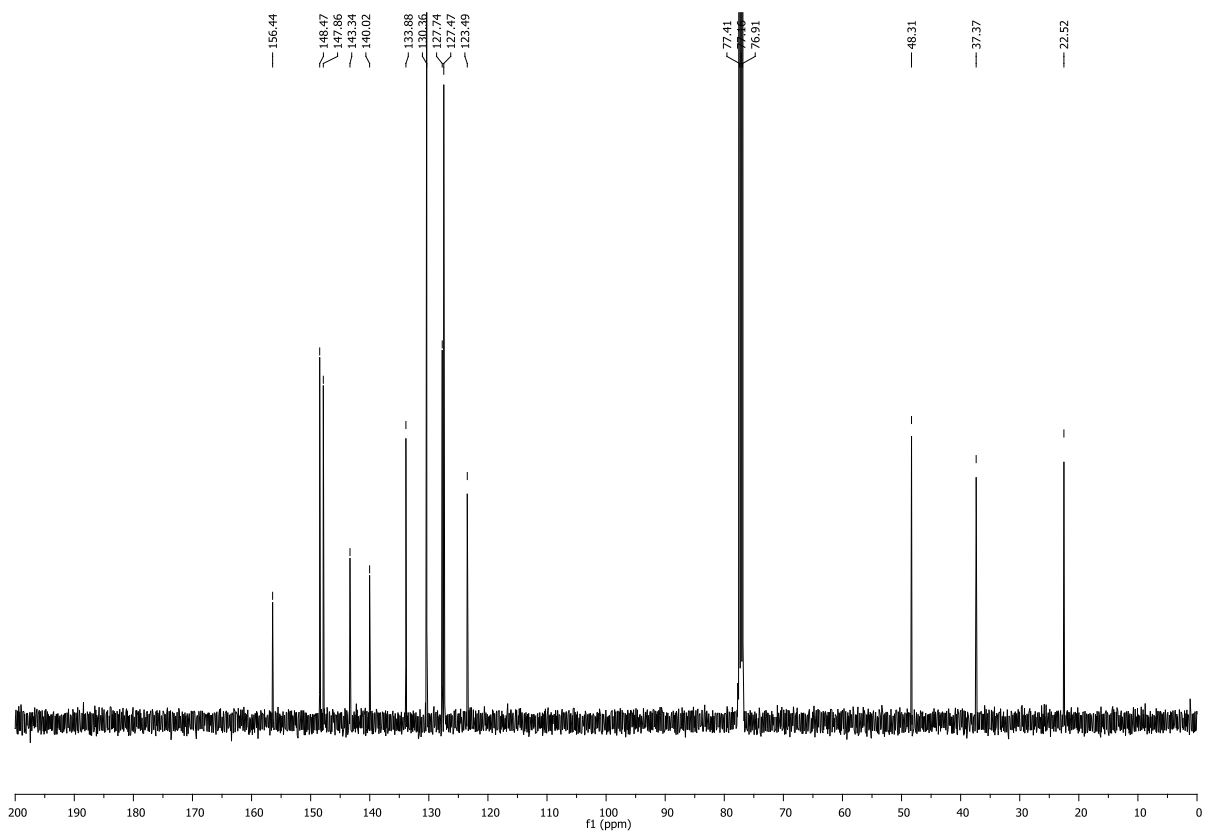

7a

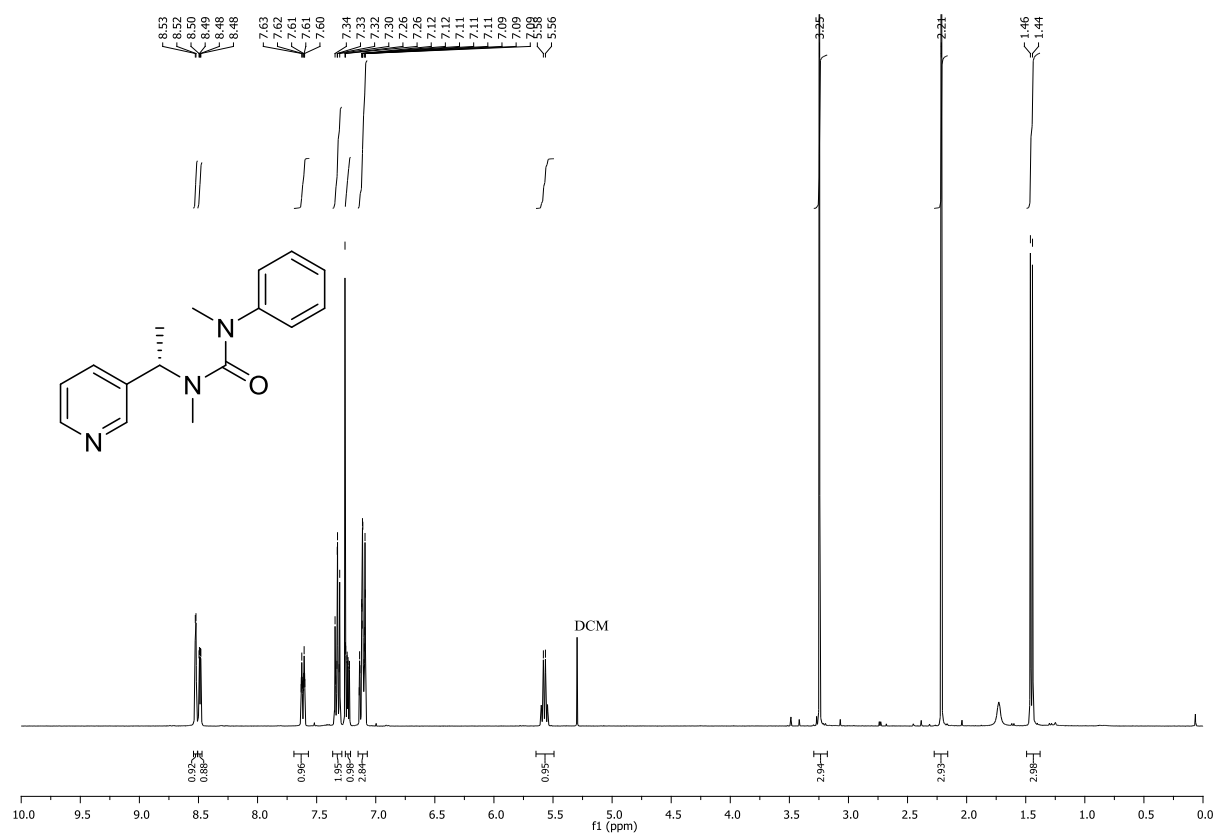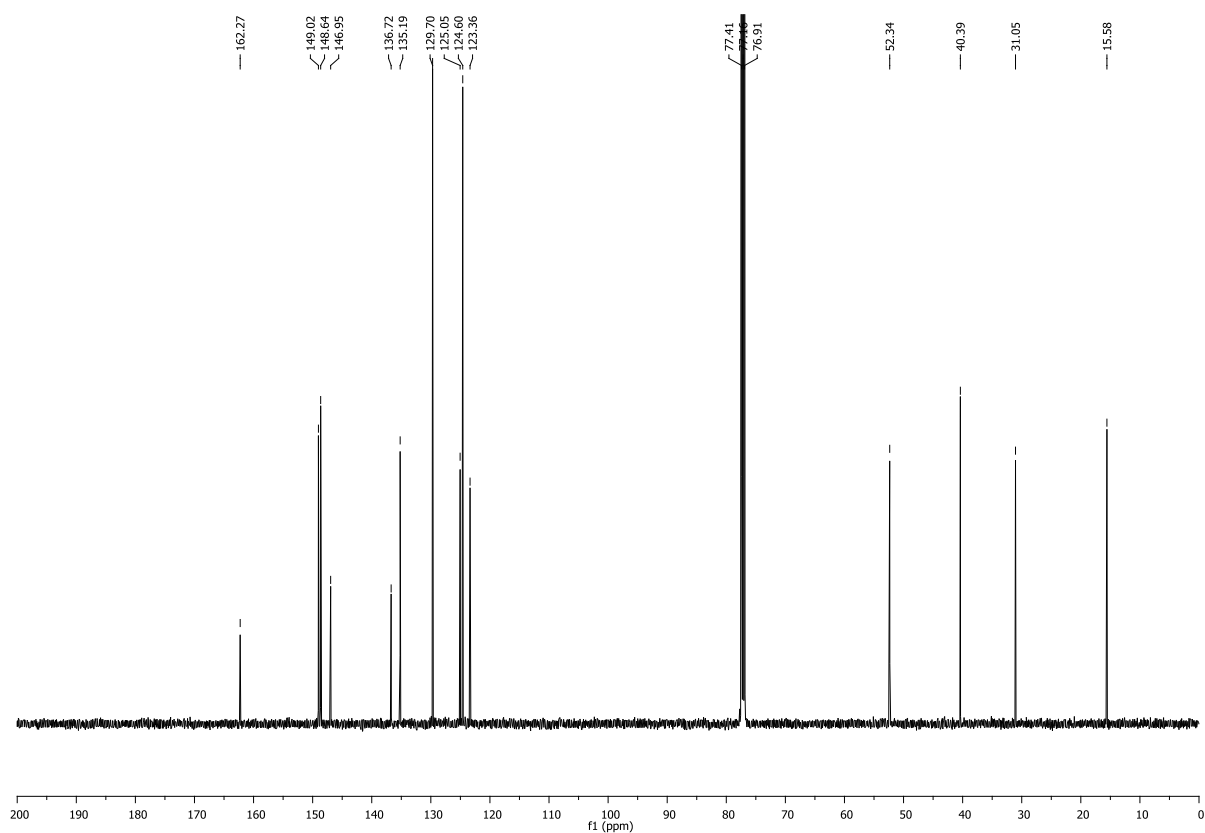

17b

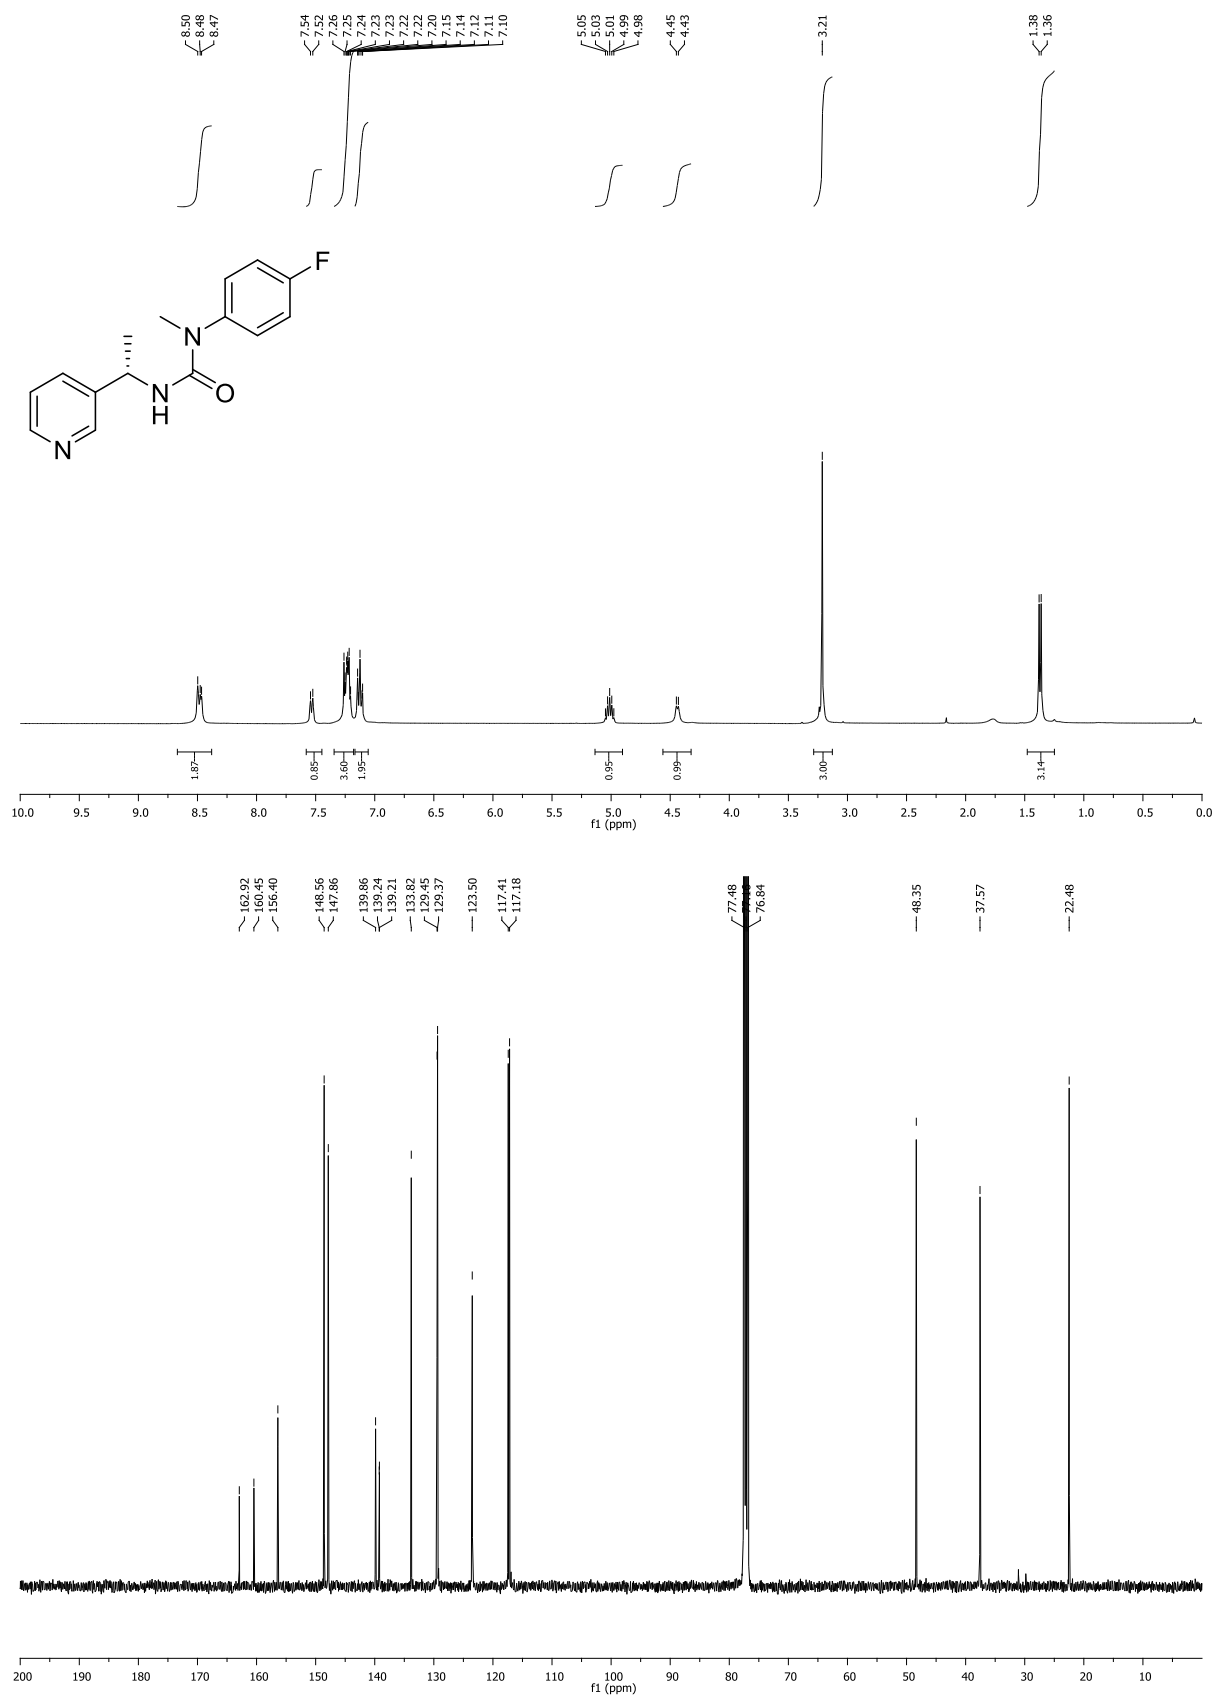

7b

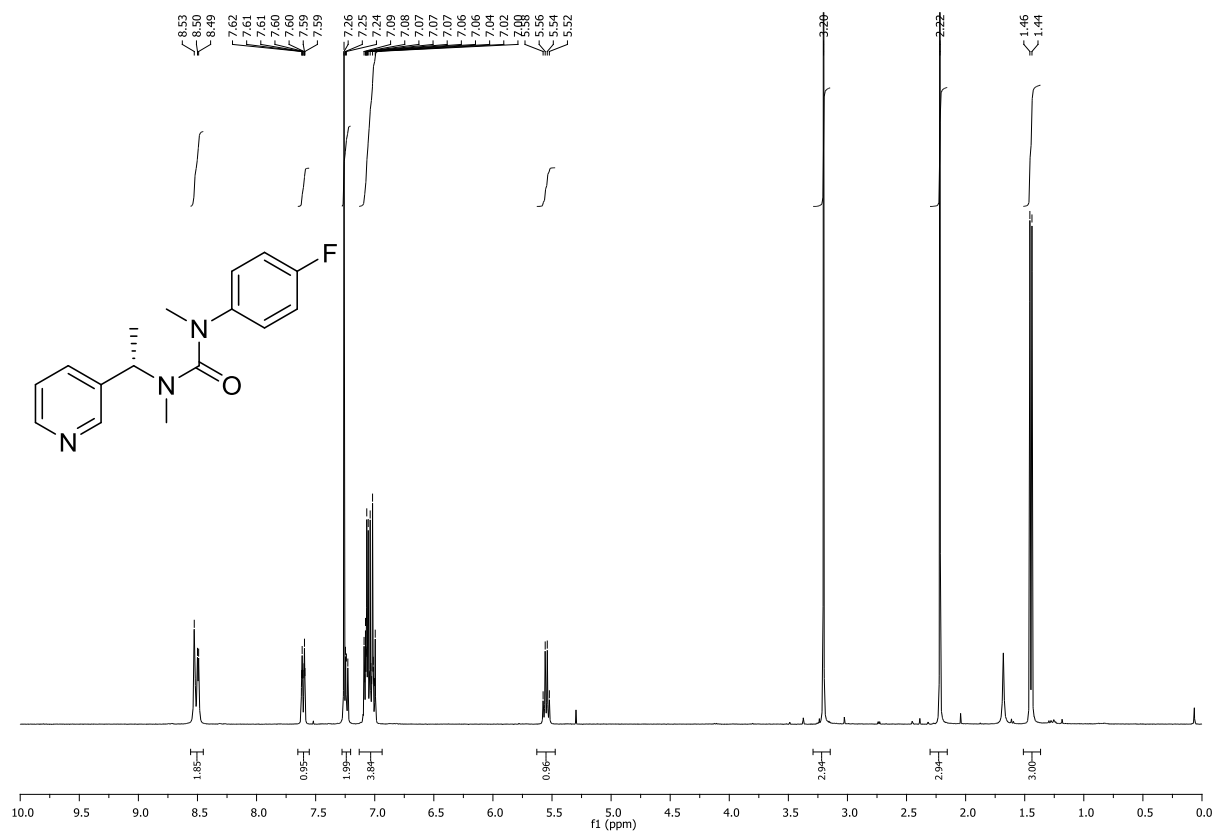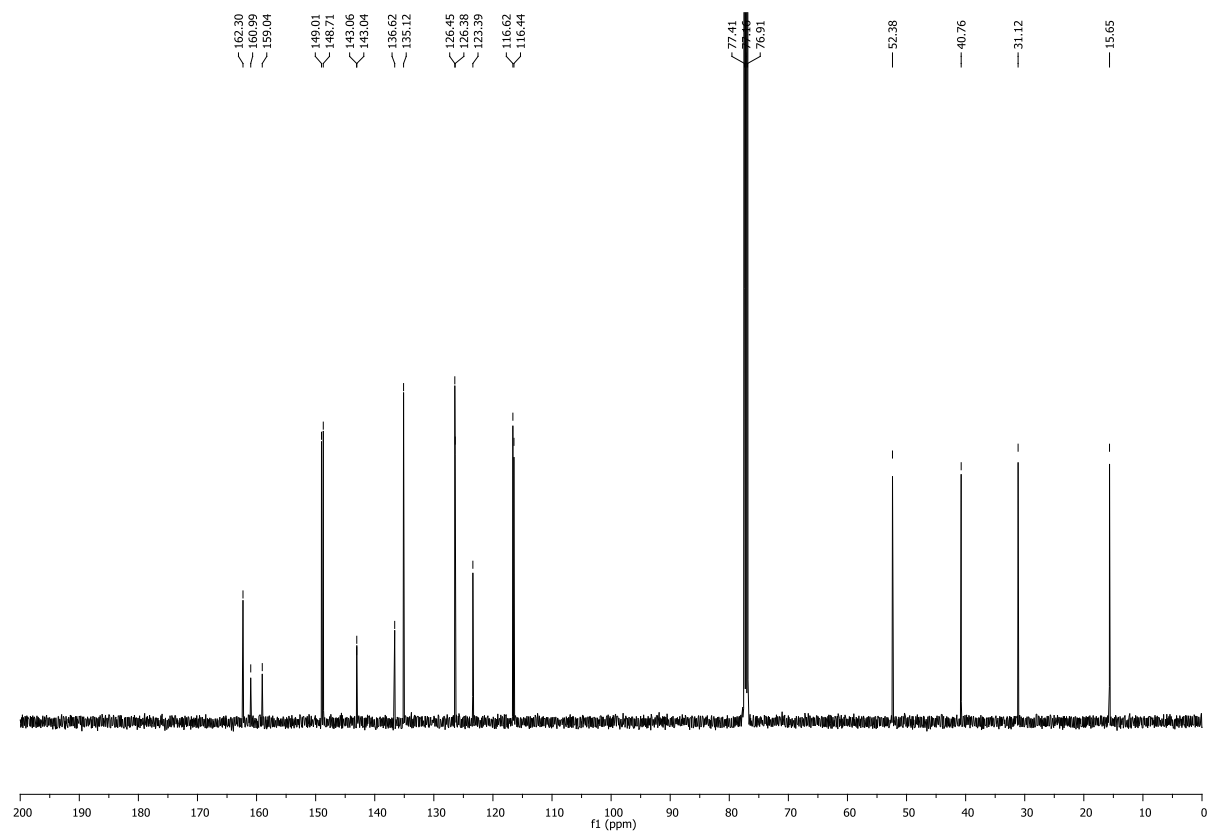

17c

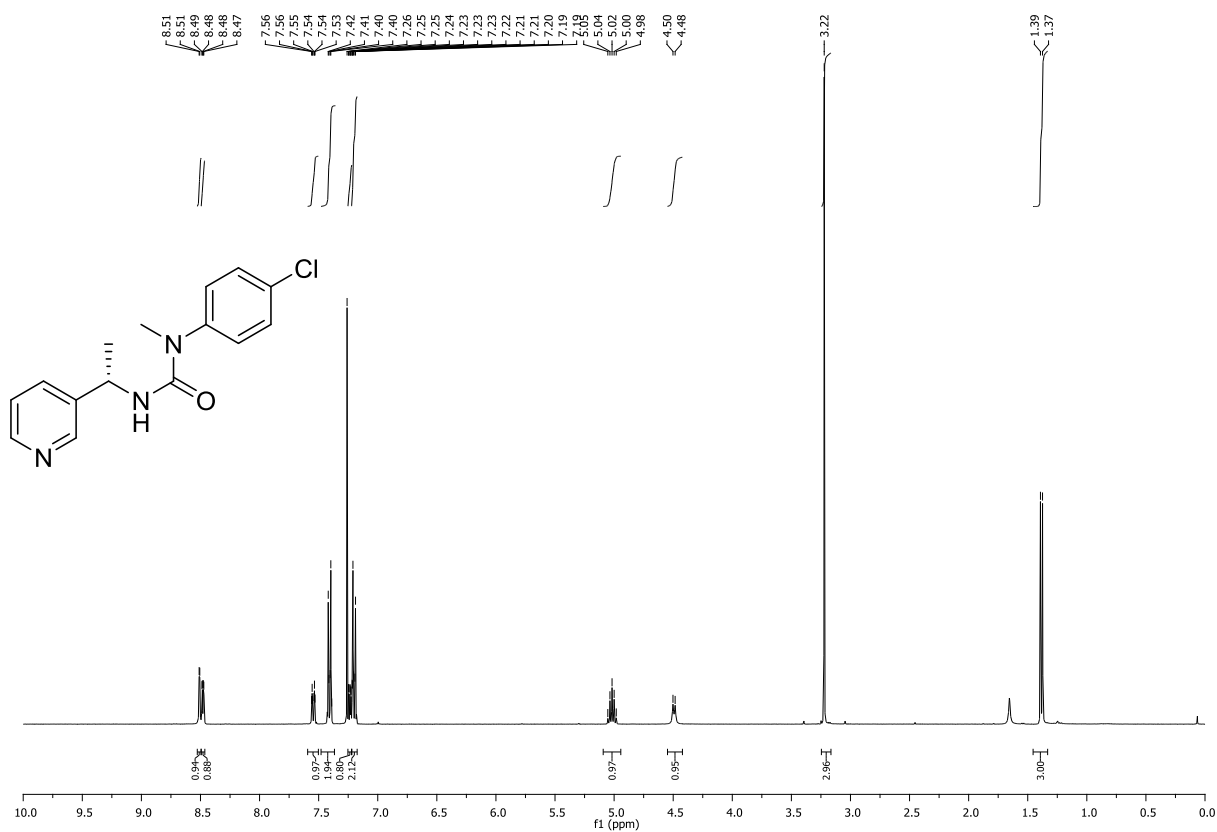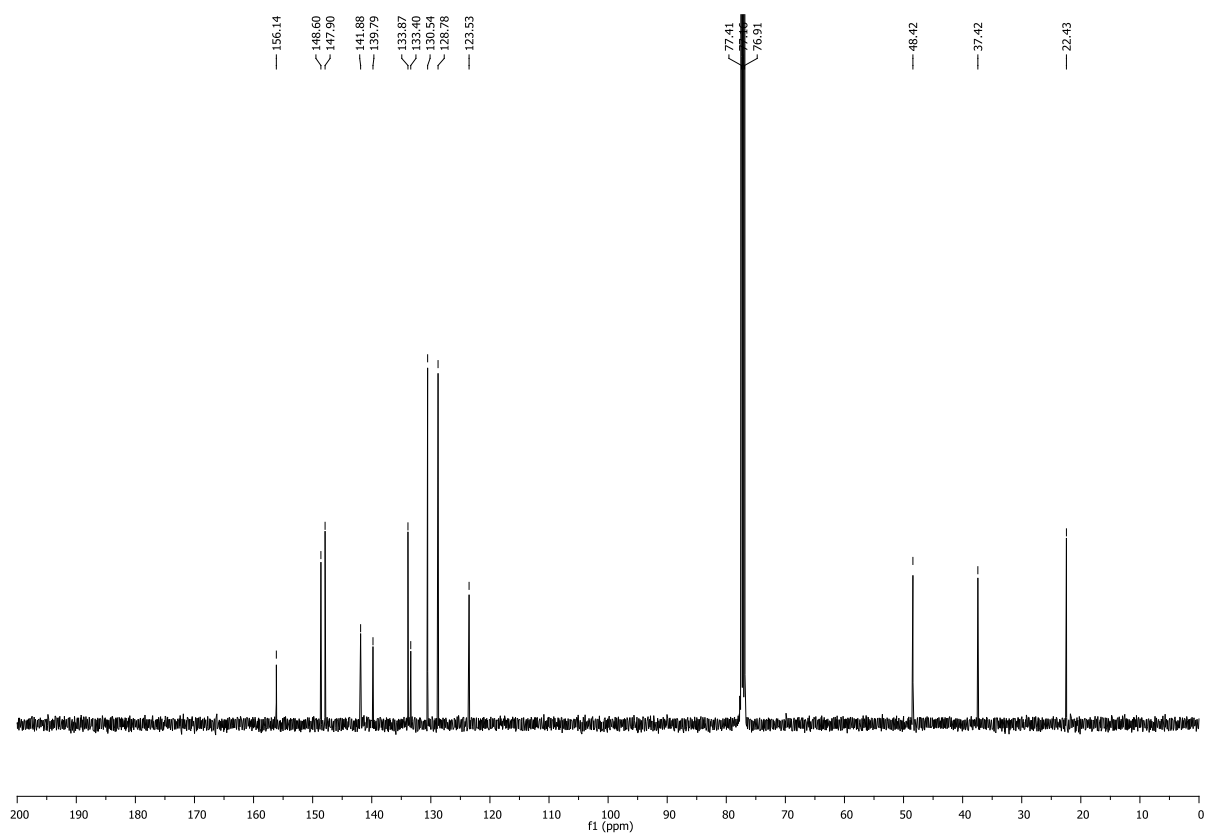

7c

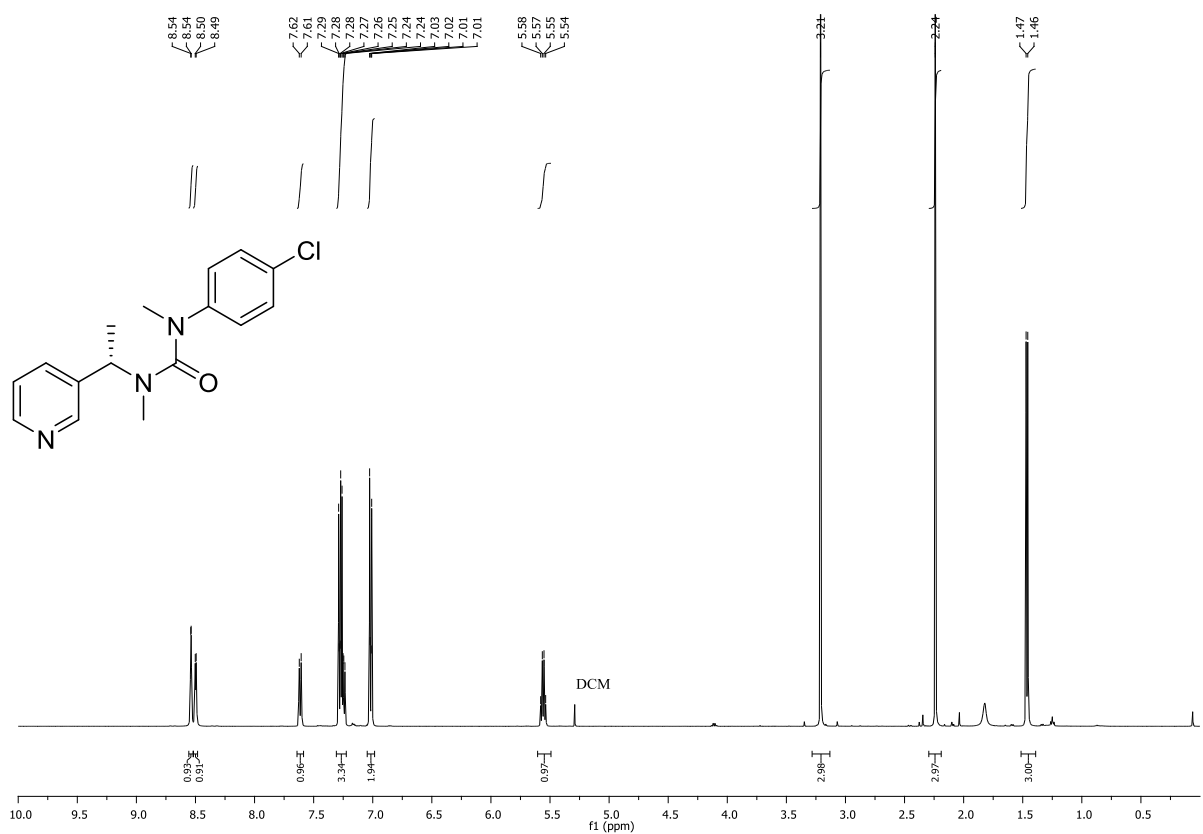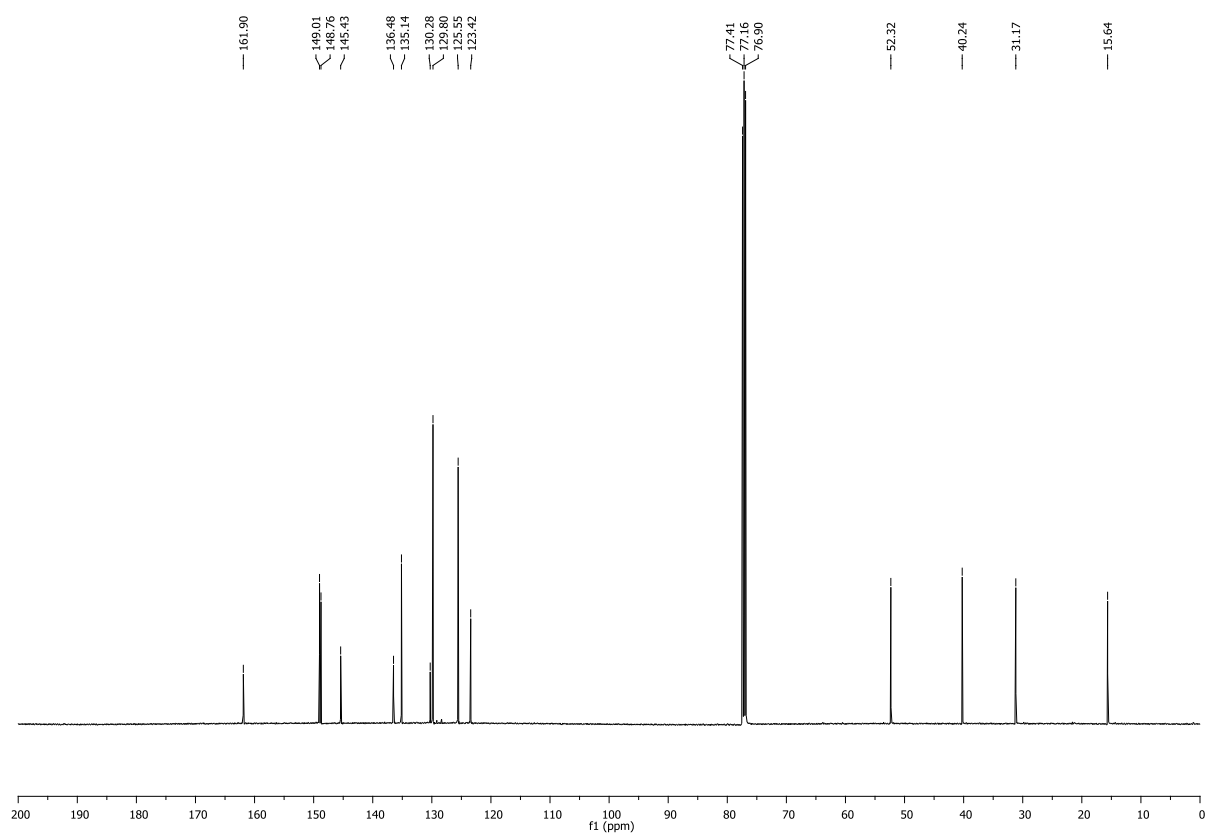

17d

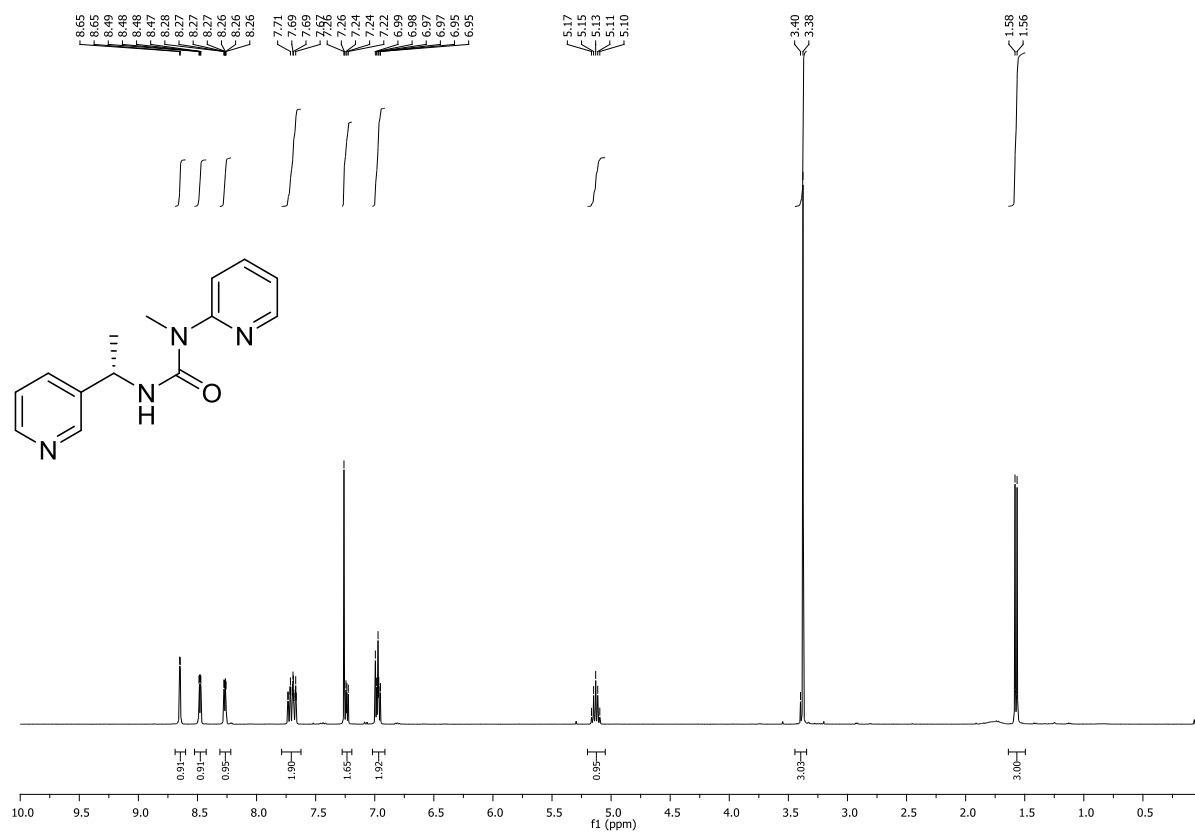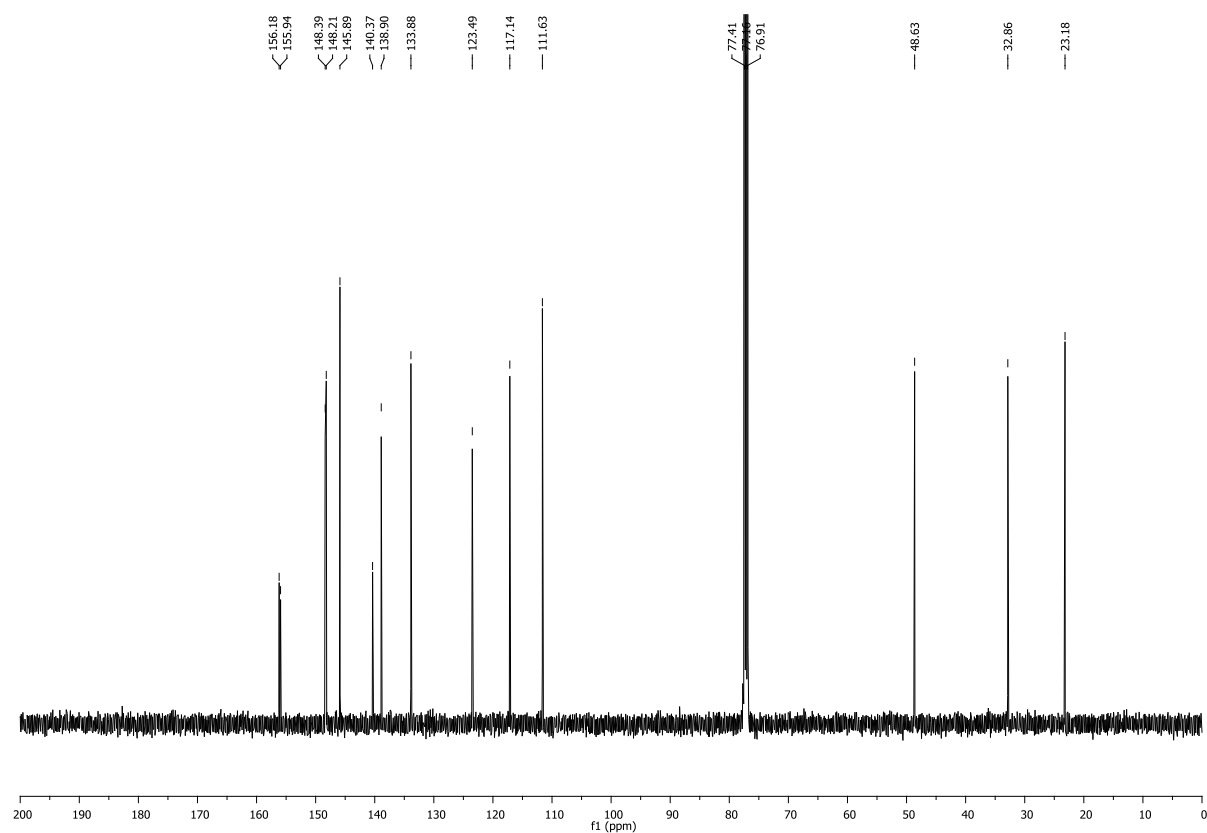

7d

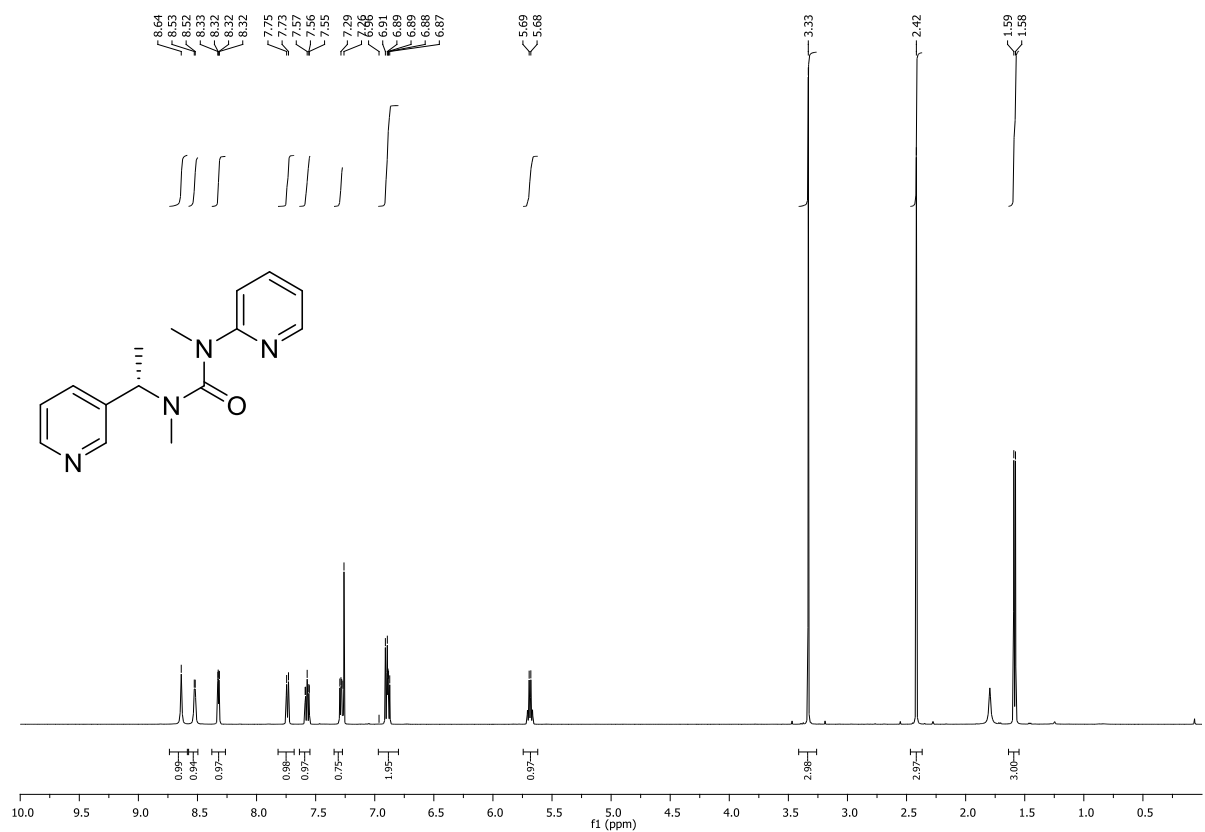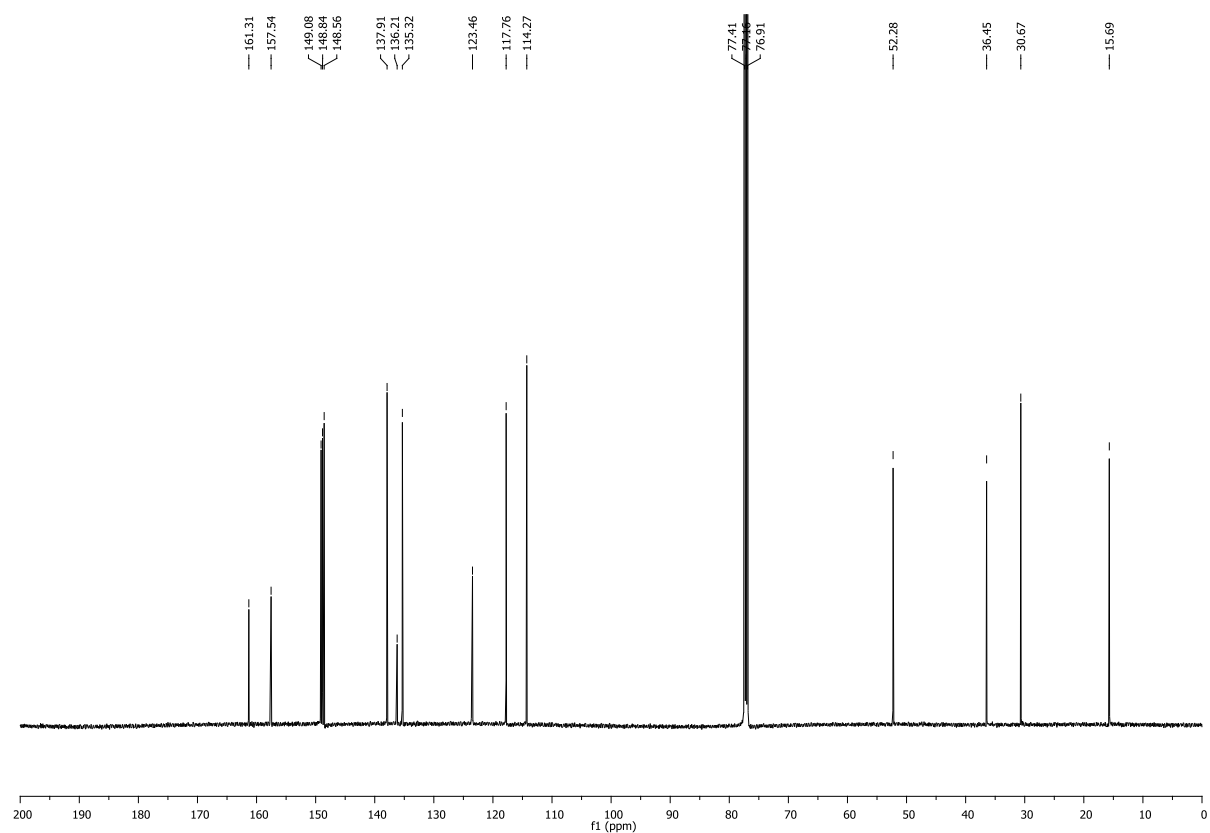

17e

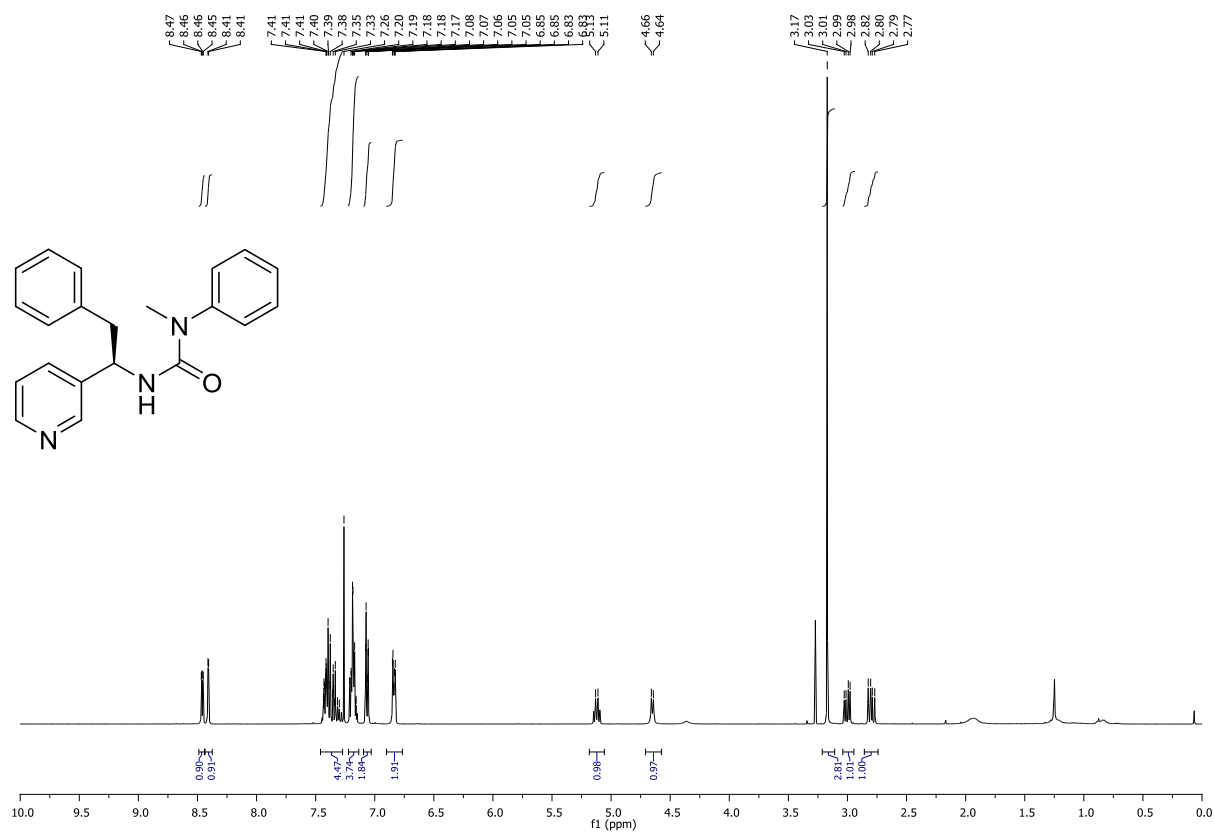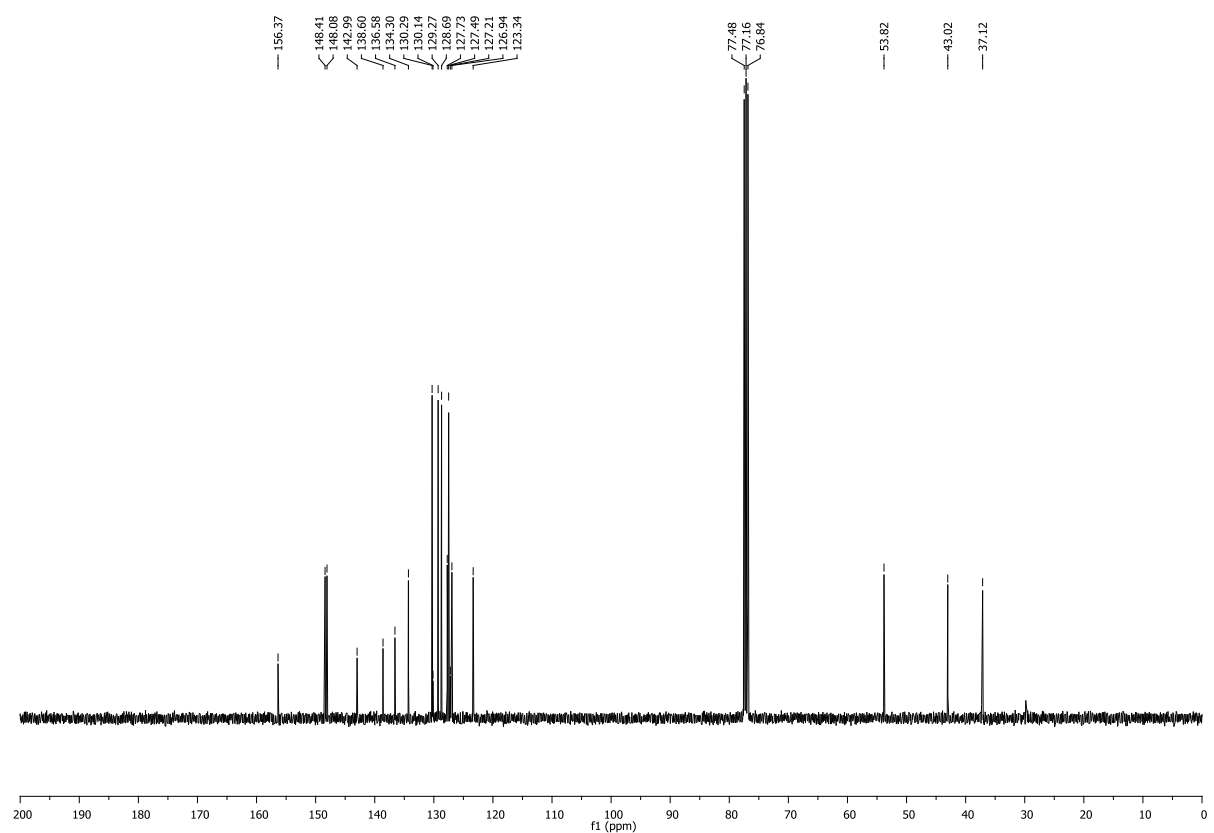

7e

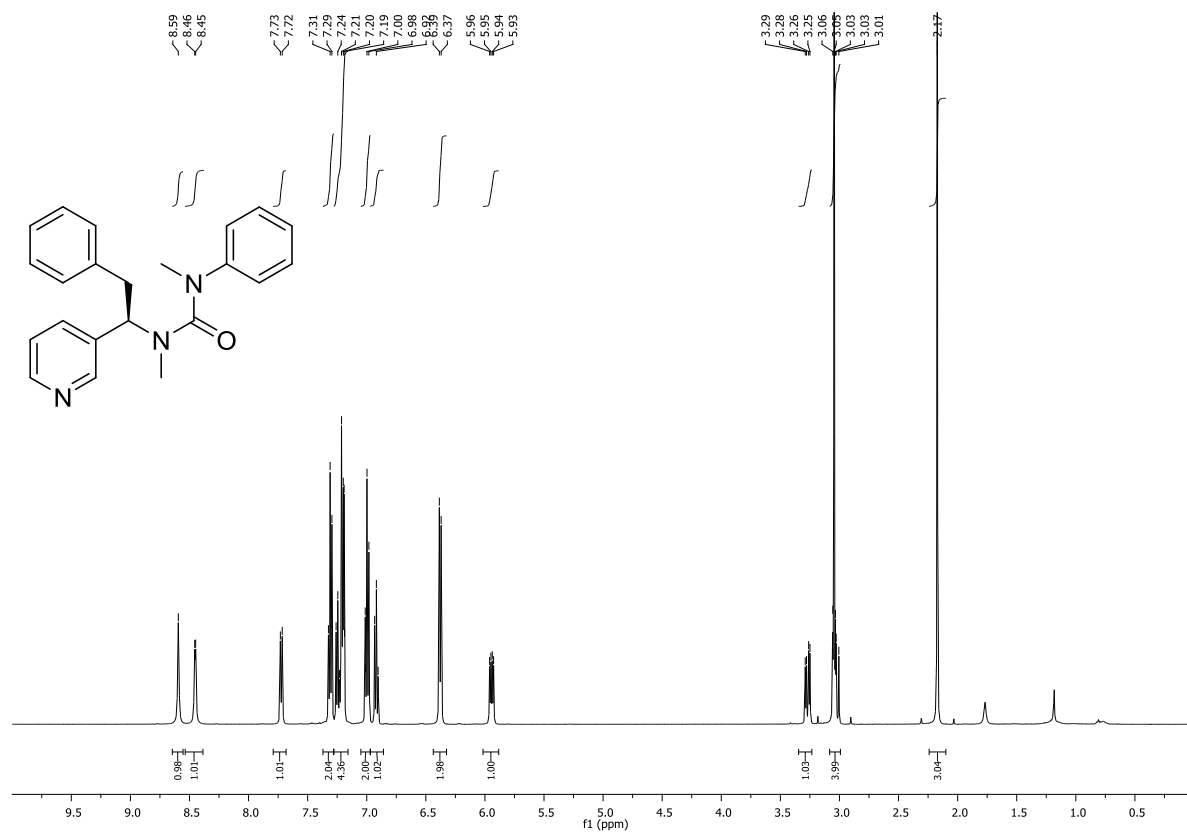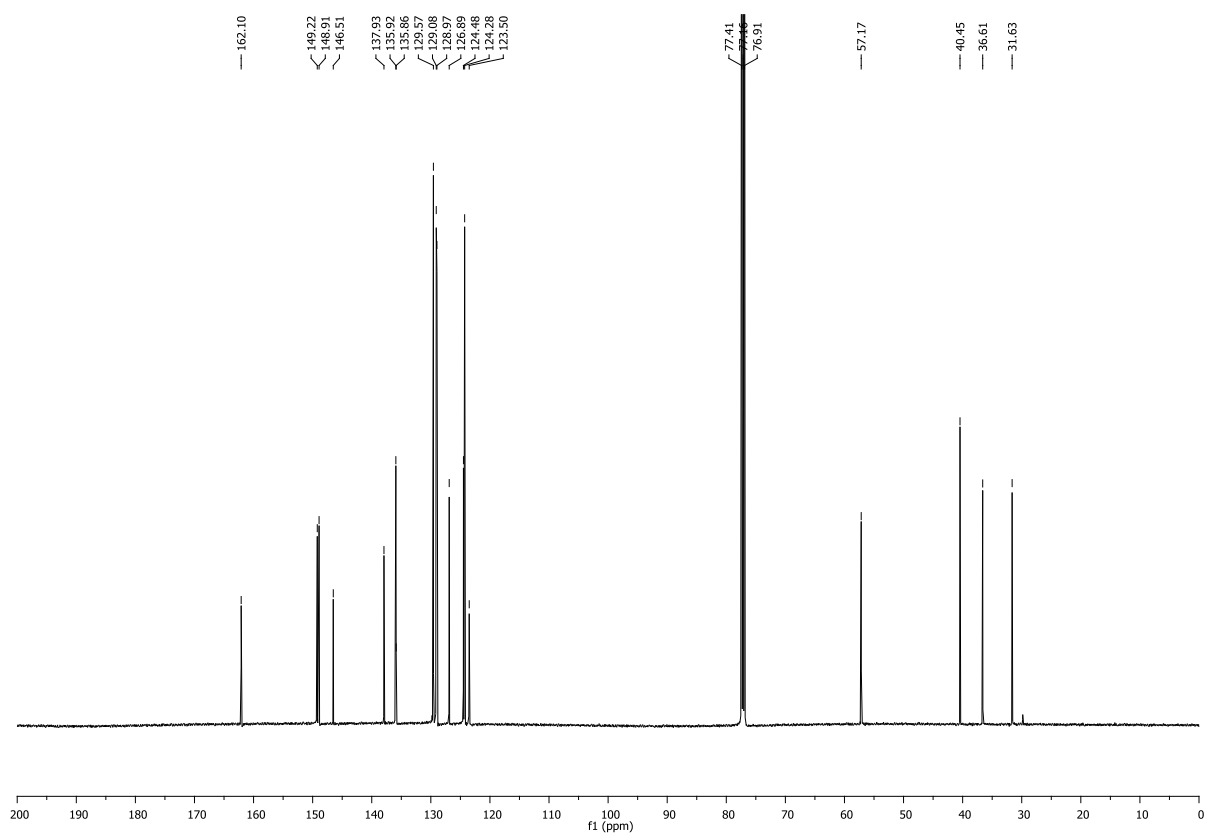

17f

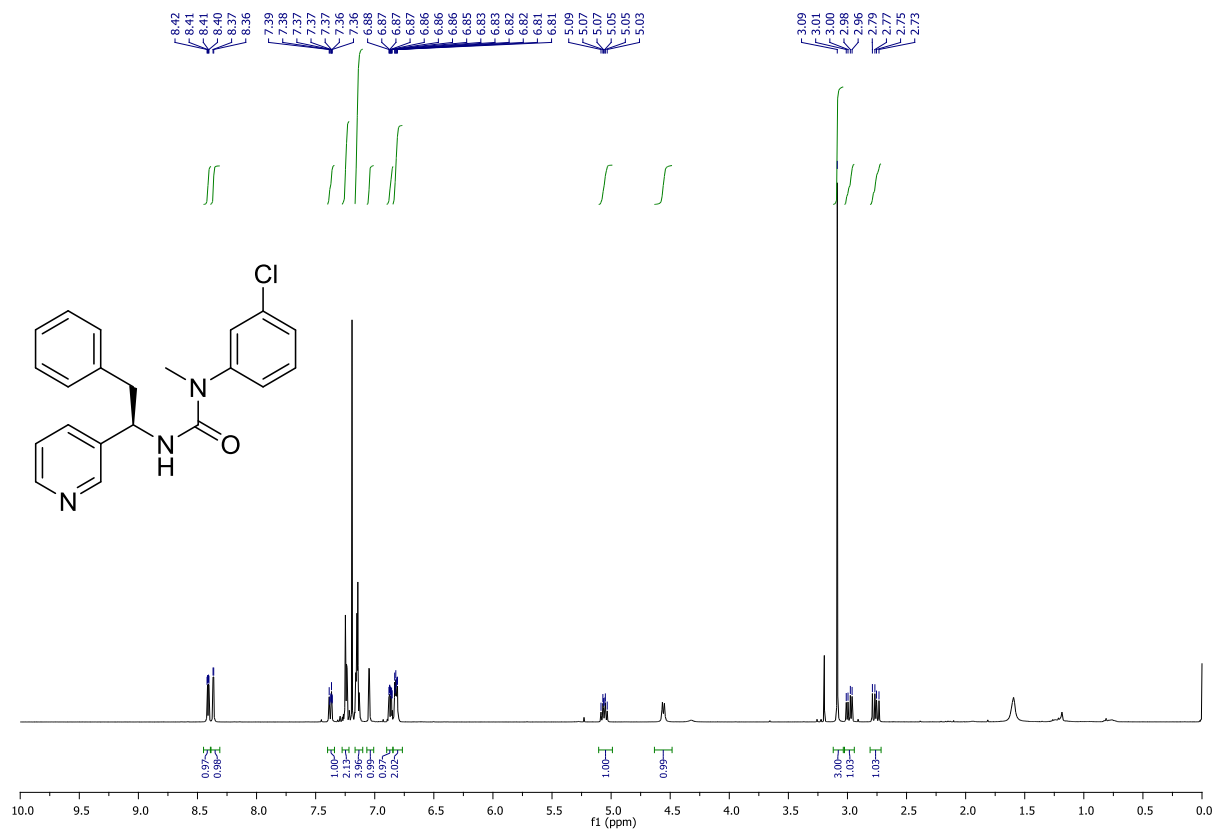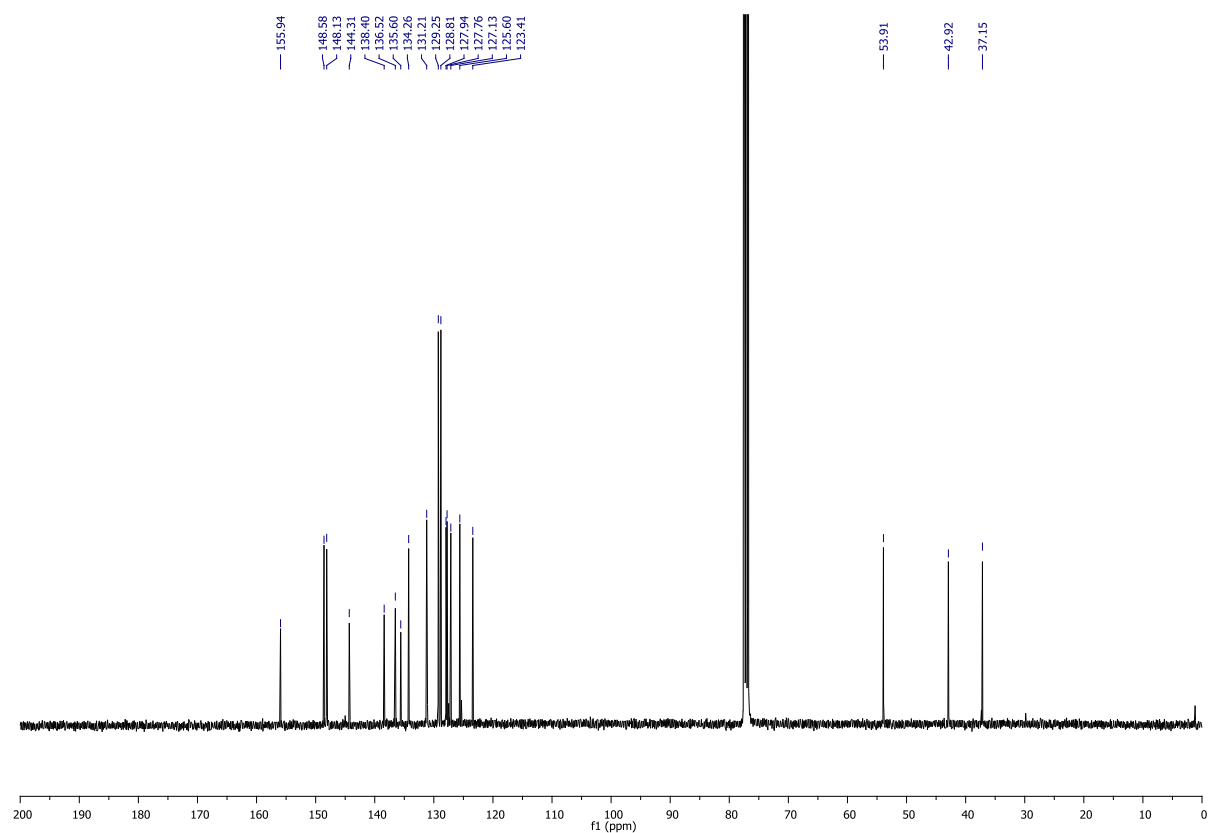

7f

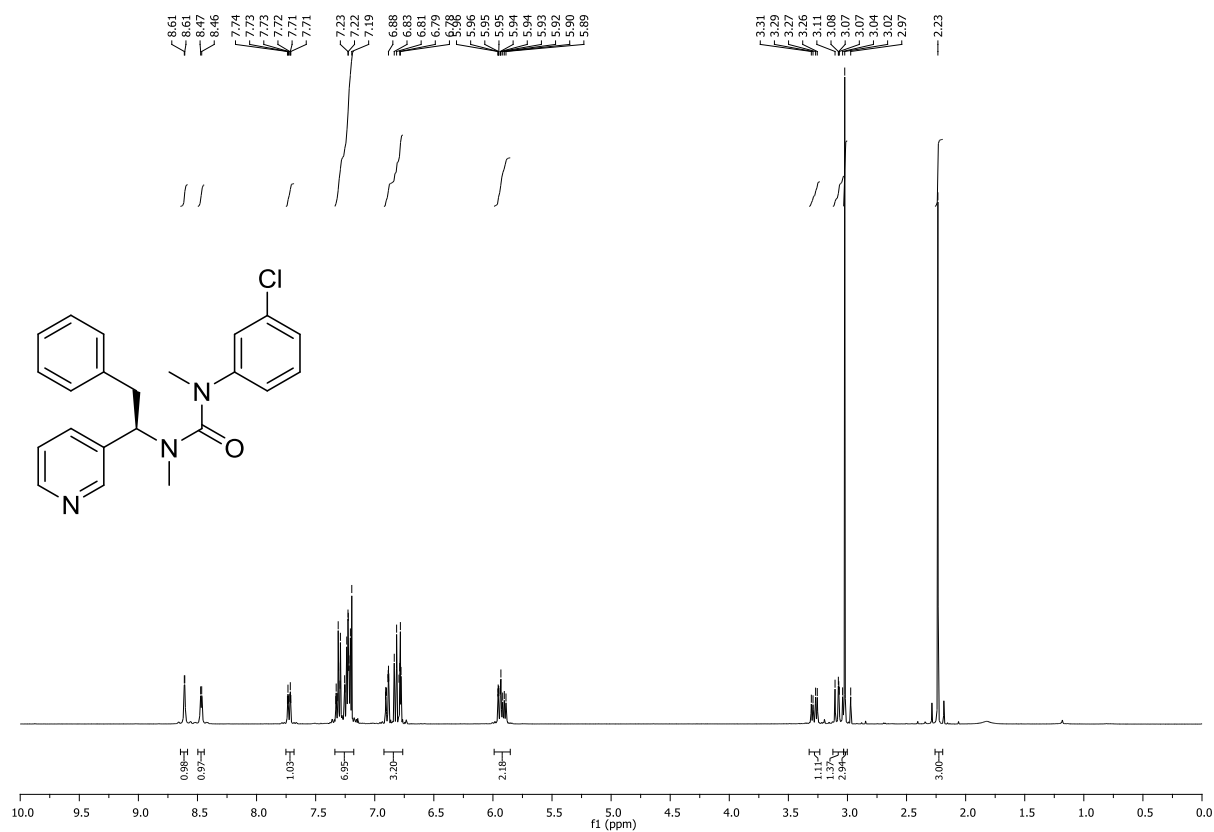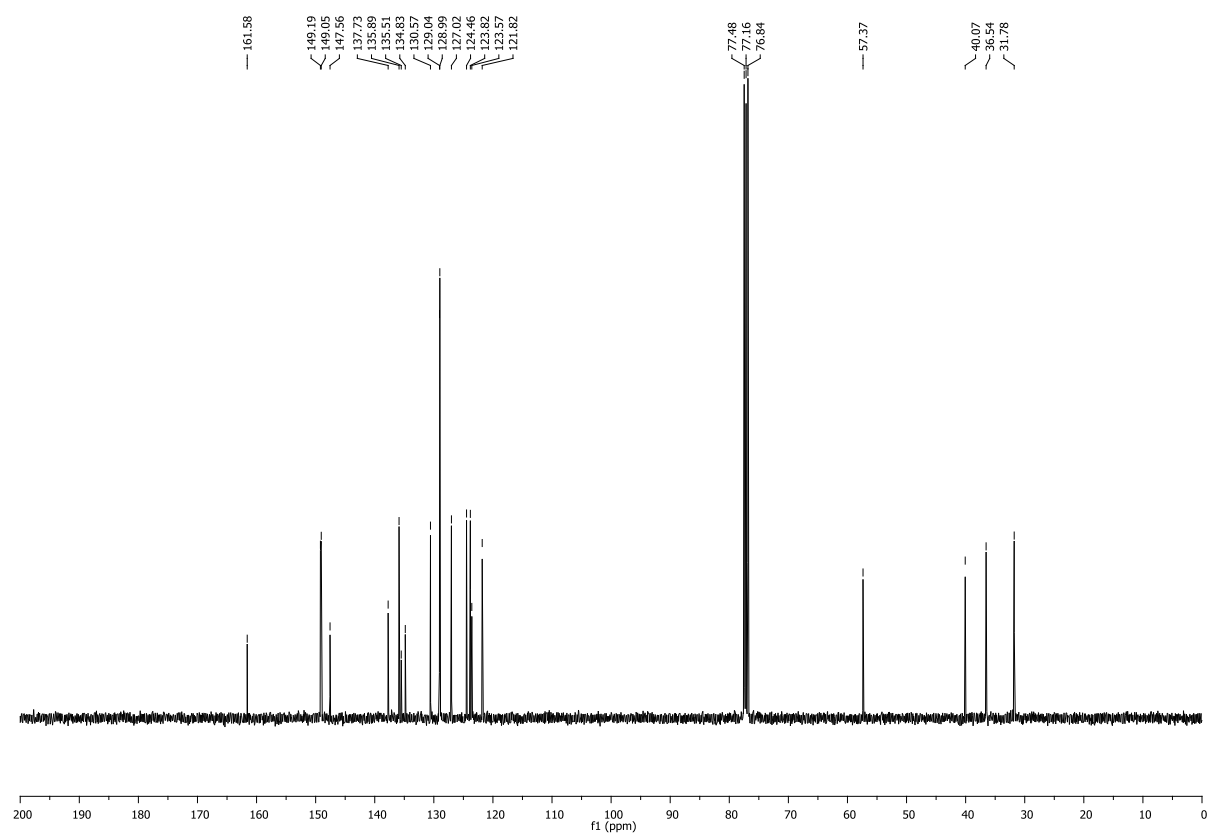

17g

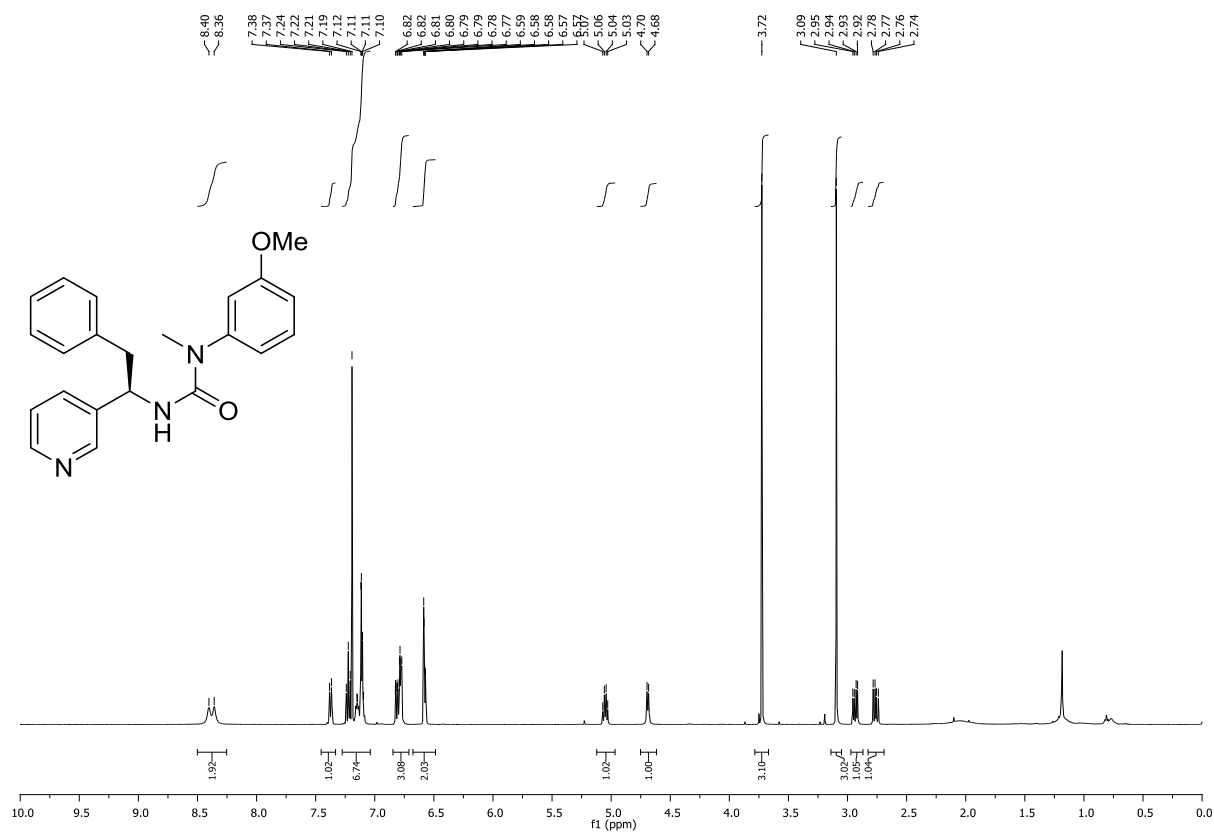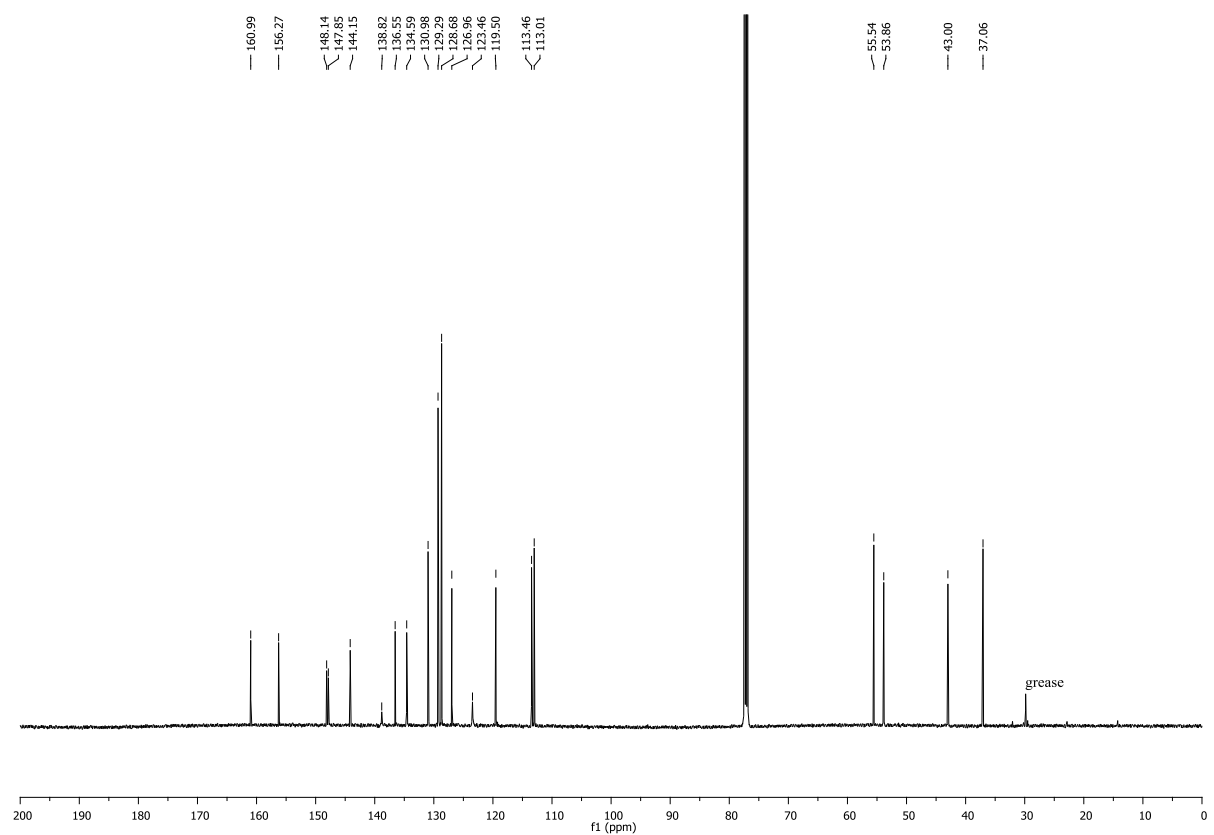

7g

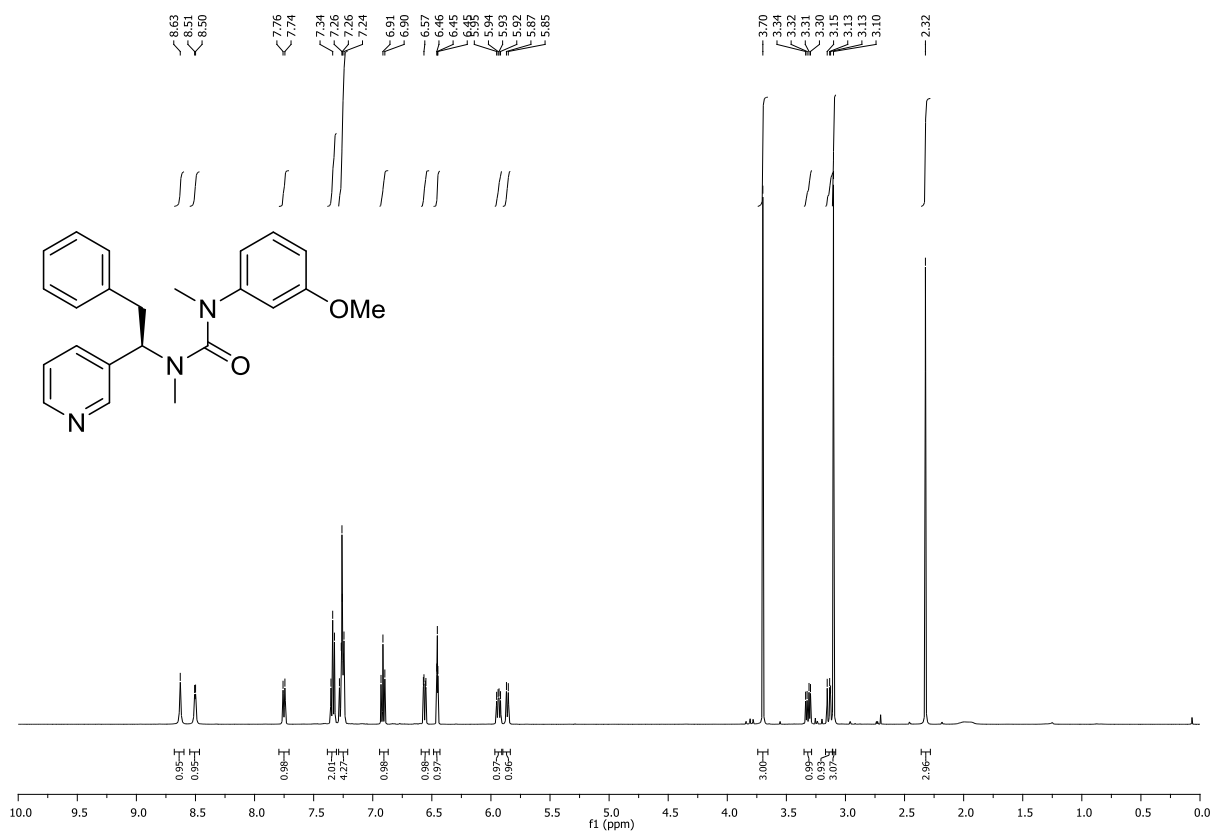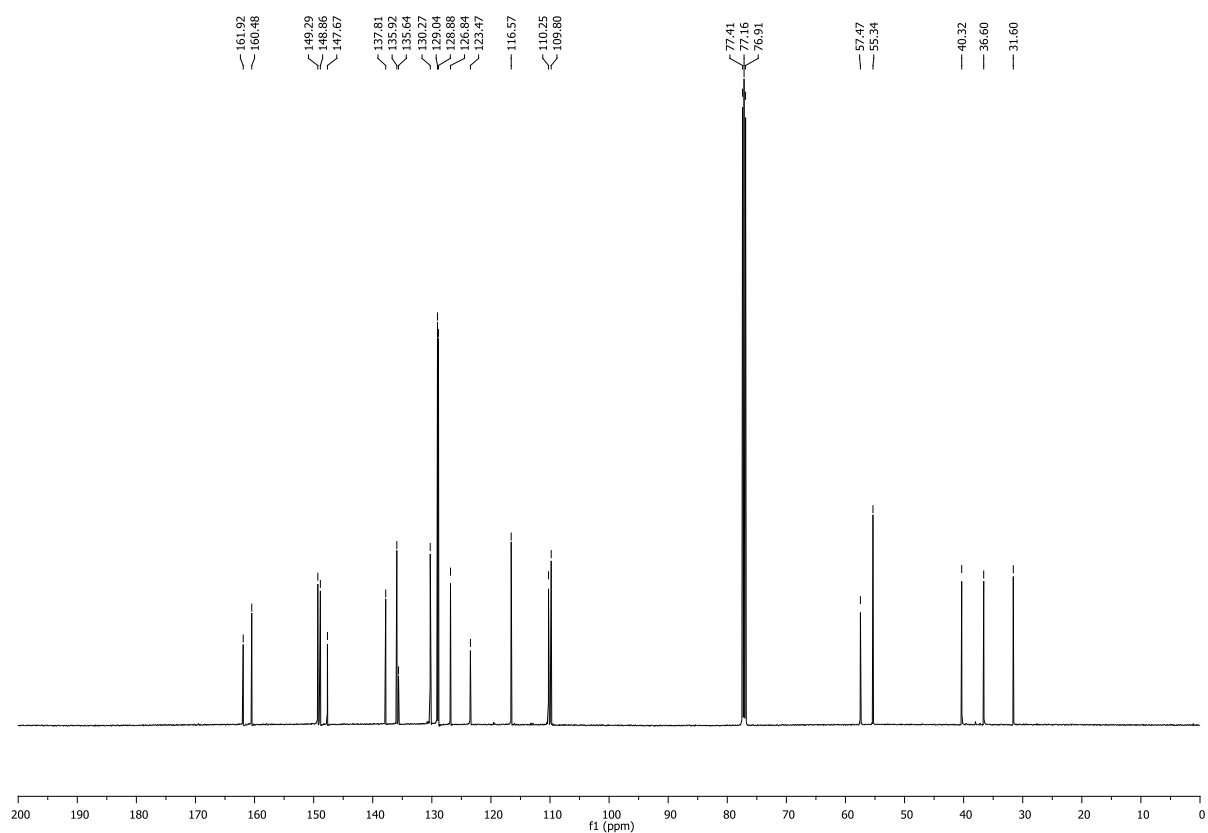

17h

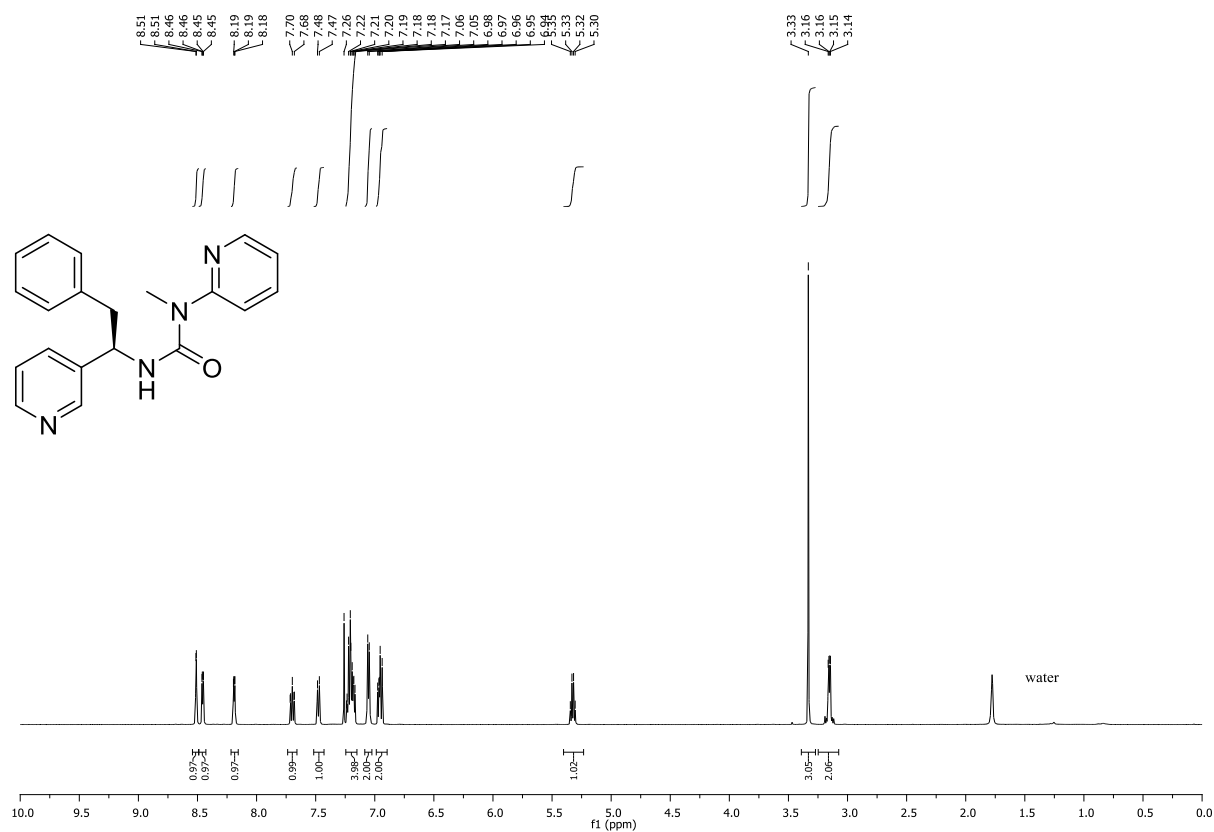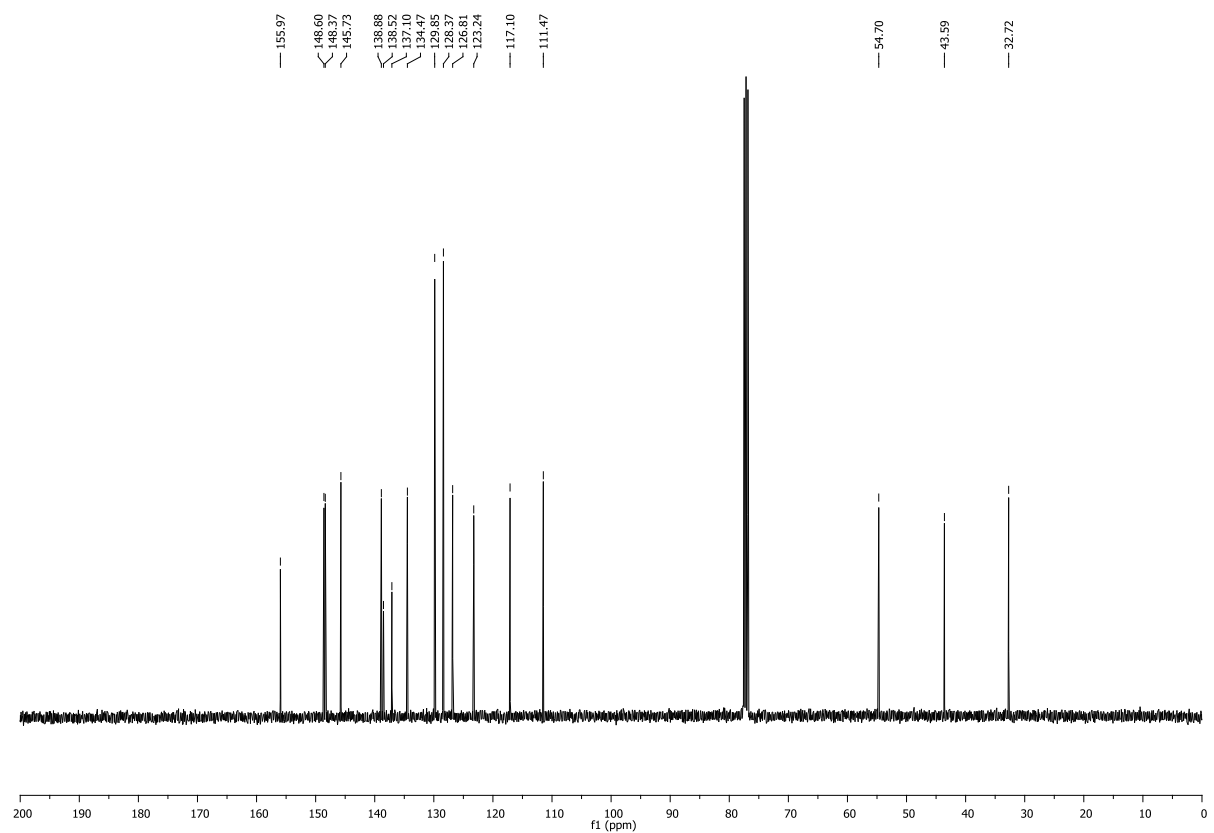

7h

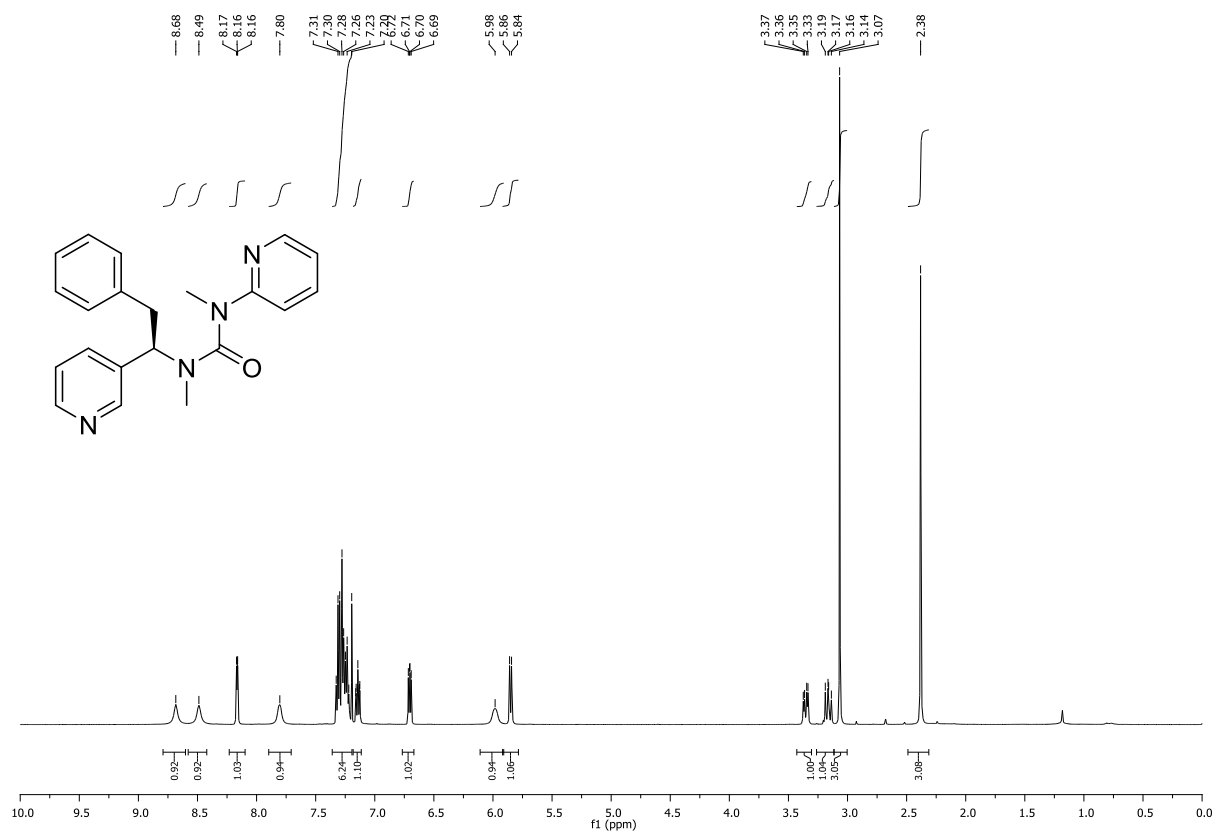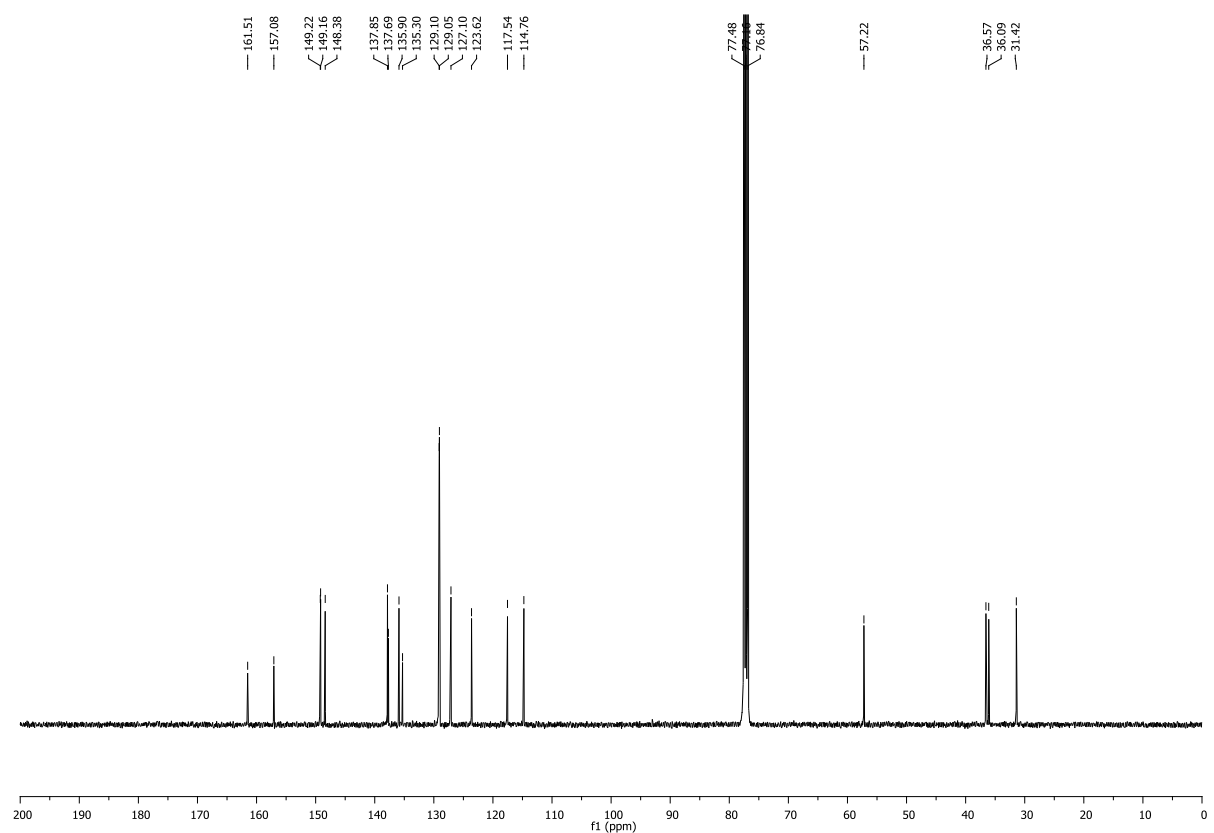

18a

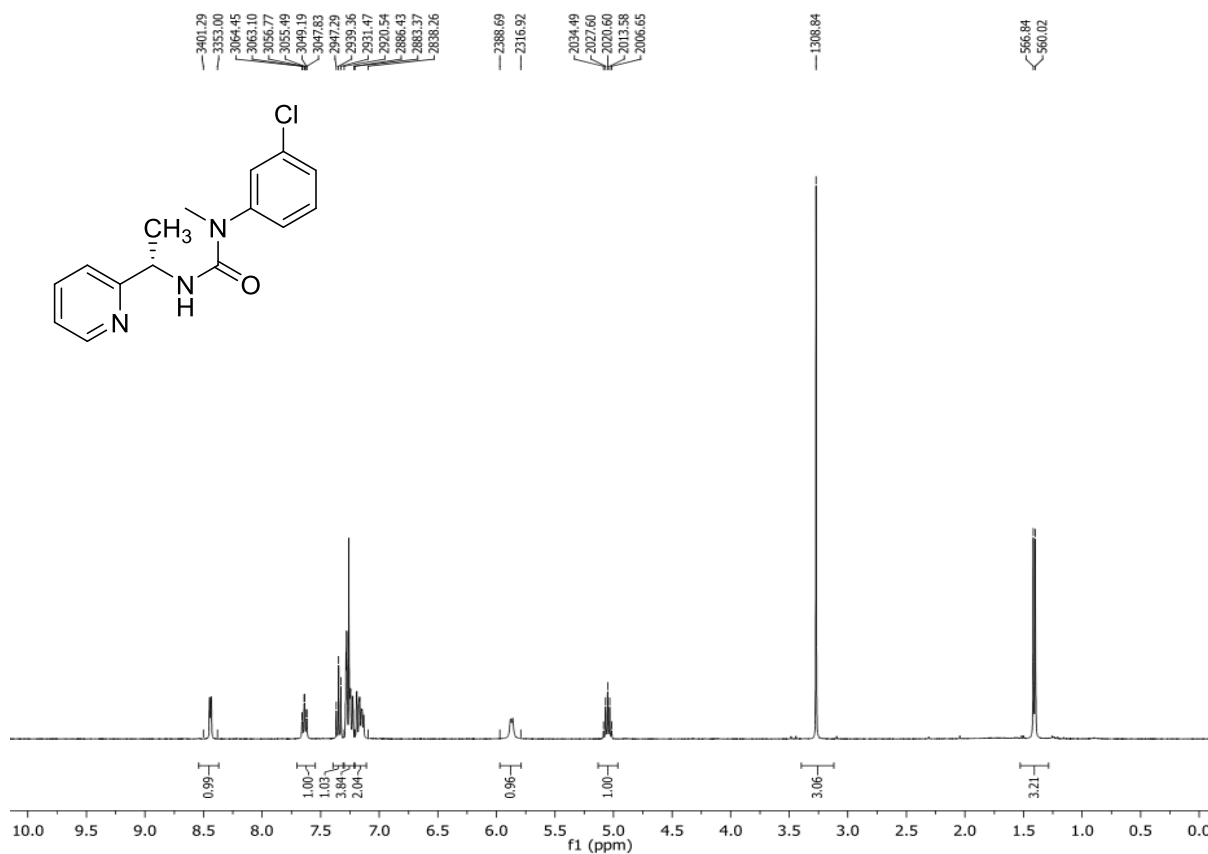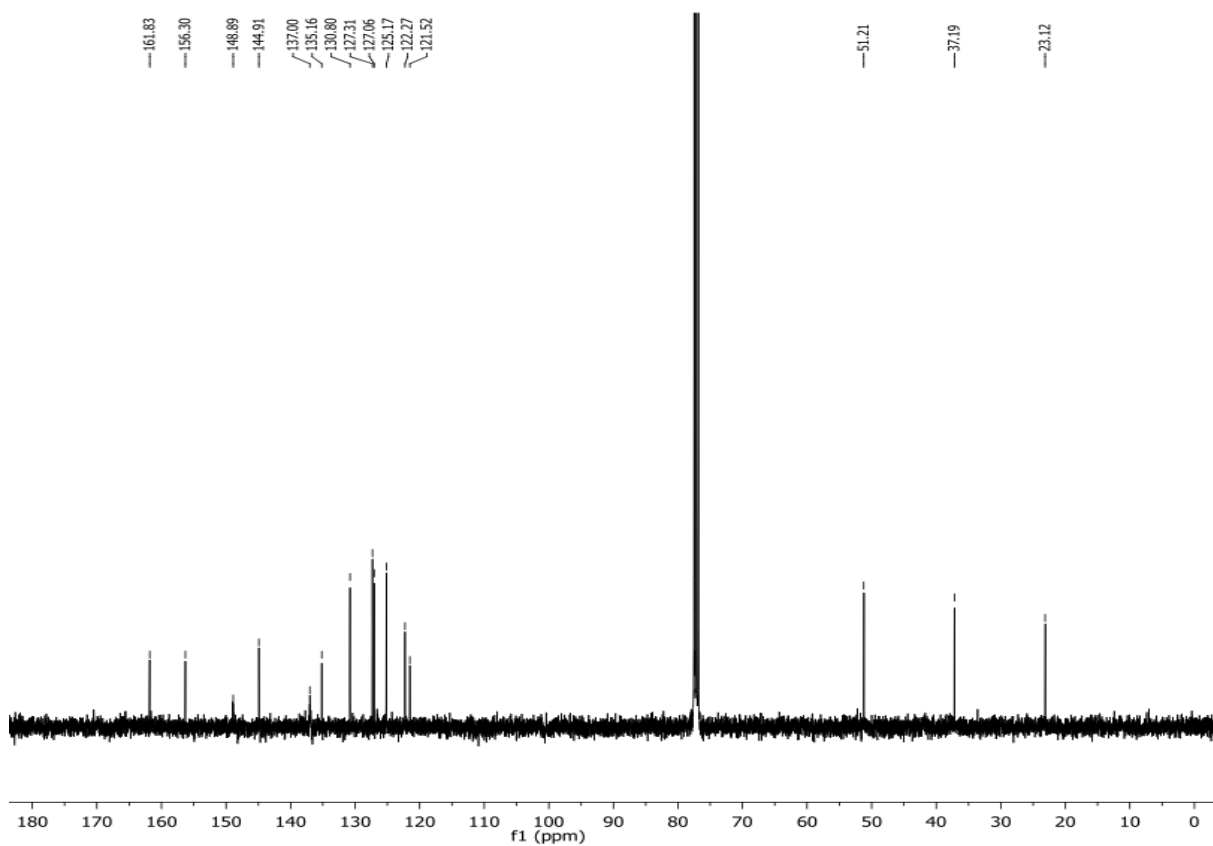

Chemical structure: CN(C)C(=O)N(C)[C@H](c1ccccn1)c2ccc(Cl)cc2

<sup>1</sup>H NMR (400 MHz, CDCl<sub>3</sub>) peaks (ppm): 8.54, 7.45, 7.35, 7.25, 7.15, 7.05, 5.55, 3.12, 2.38, 1.52. Integrations: 0.99, 1.01, 1.00, 1.04, 1.97, 2.00, 1.00, 3.12, 3.10, 3.31.

<sup>13</sup>C NMR (100 MHz, CDCl<sub>3</sub>) peaks (ppm): 161.63, 160.22, 149.01, 147.97, 136.71, 134.93, 130.42, 124.29, 123.78, 122.52, 122.33, 121.58, 77.48, 76.84, 56.02, 39.70, 31.59, 15.45.

**18b**

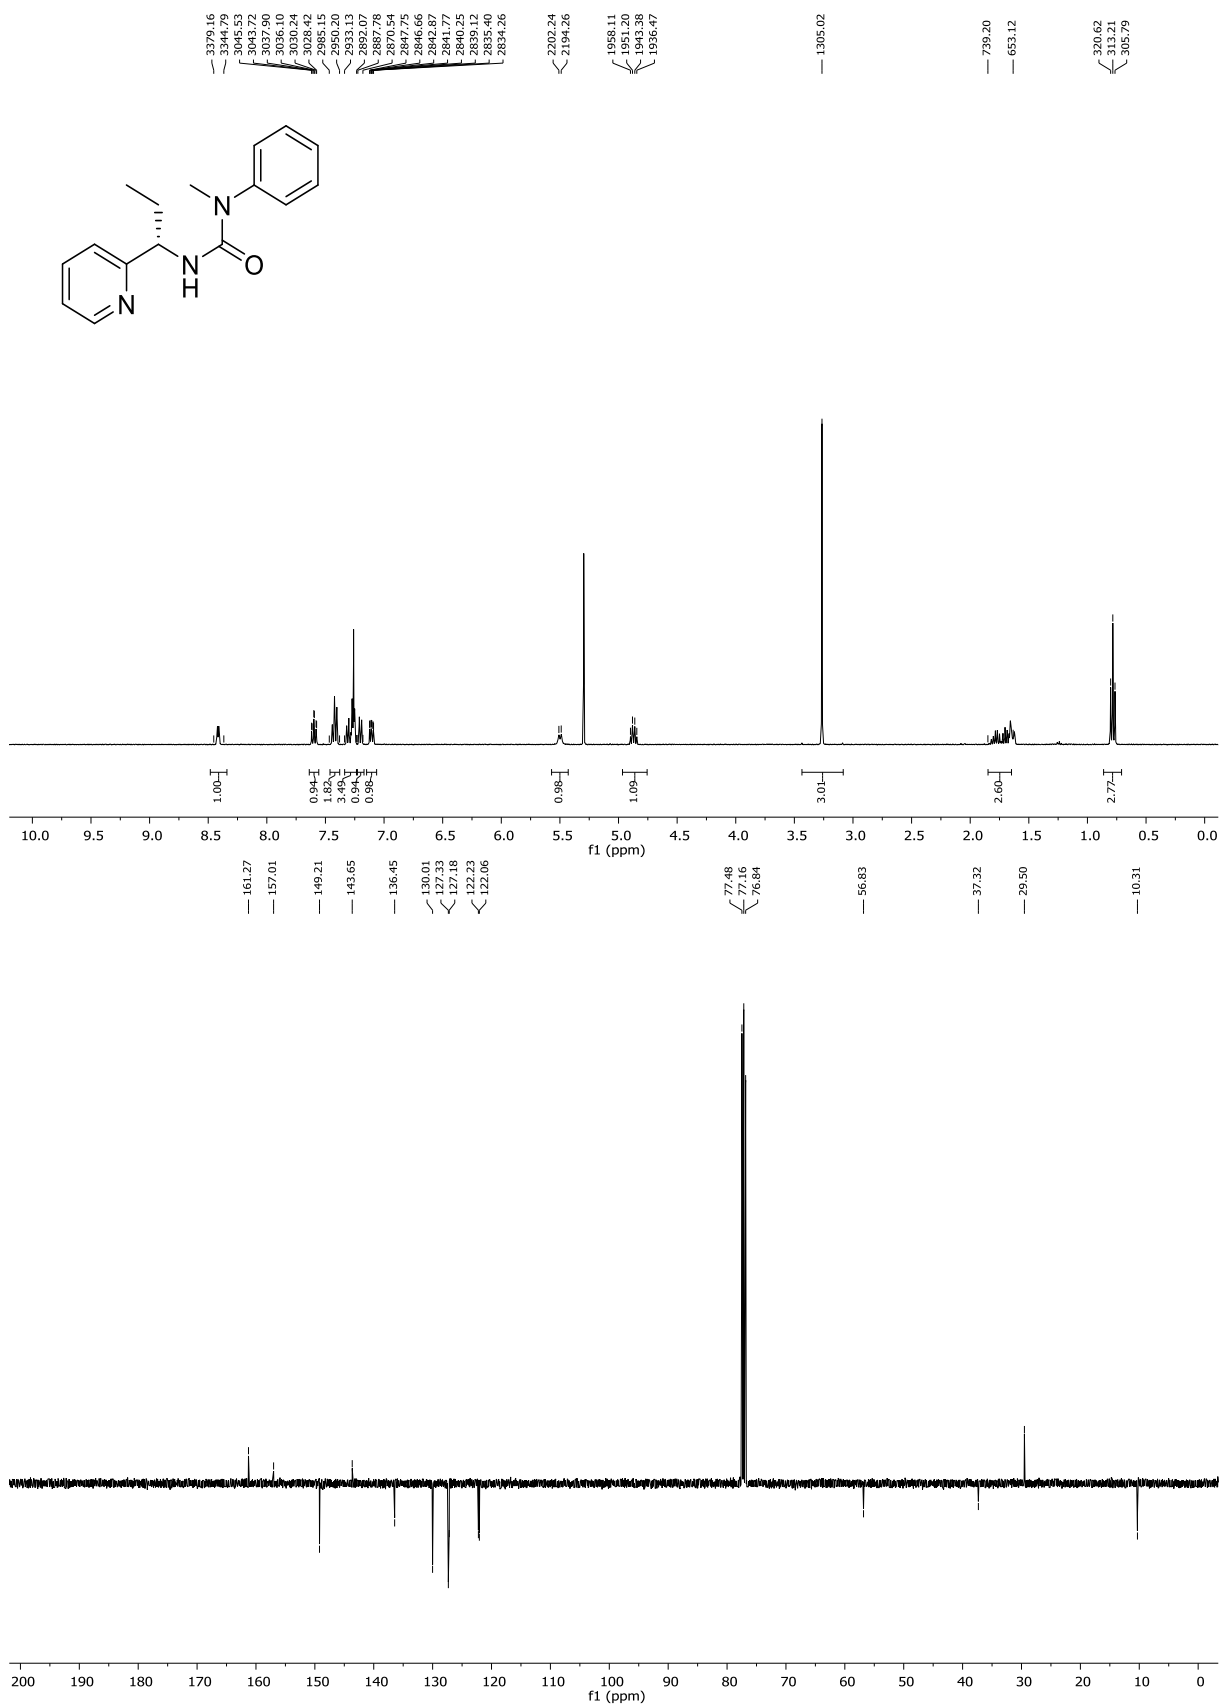

**8b**

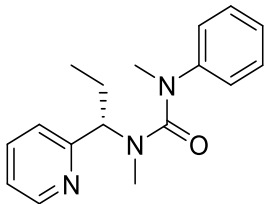

18c

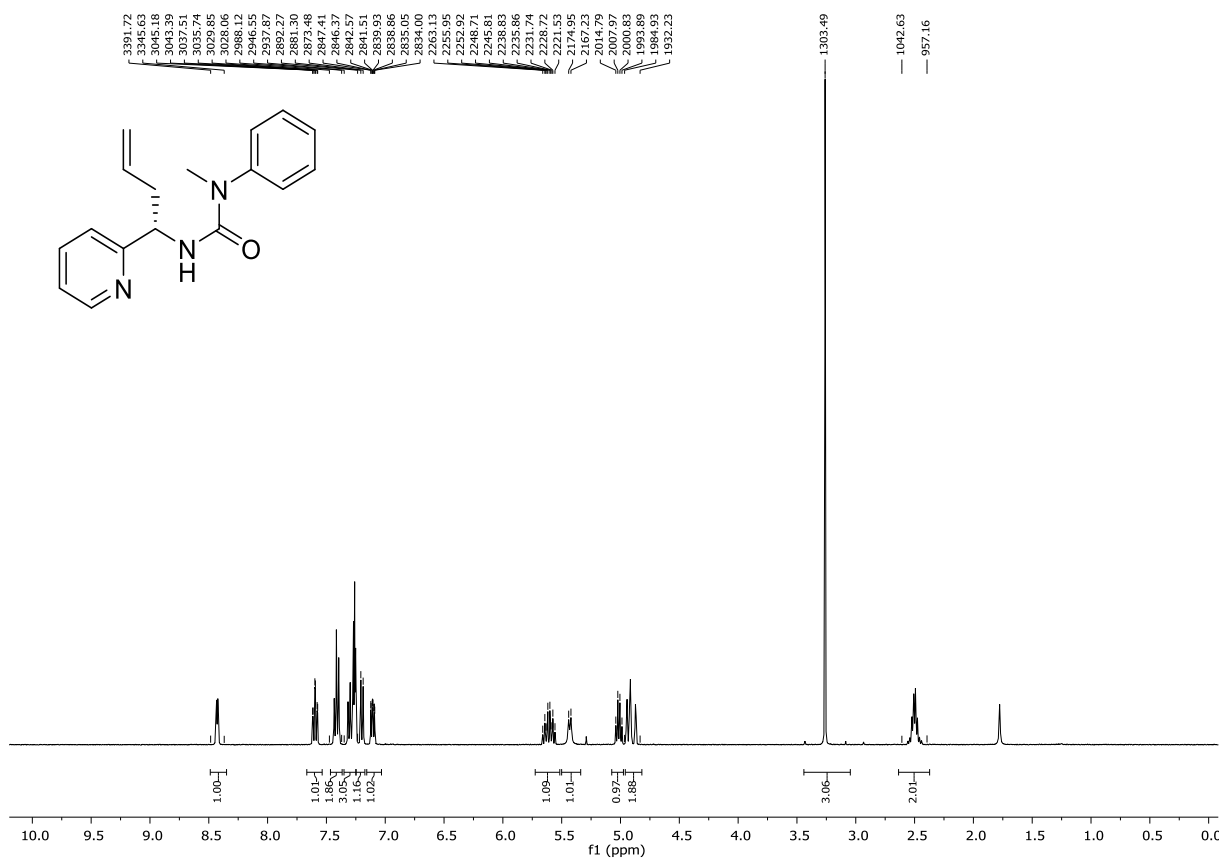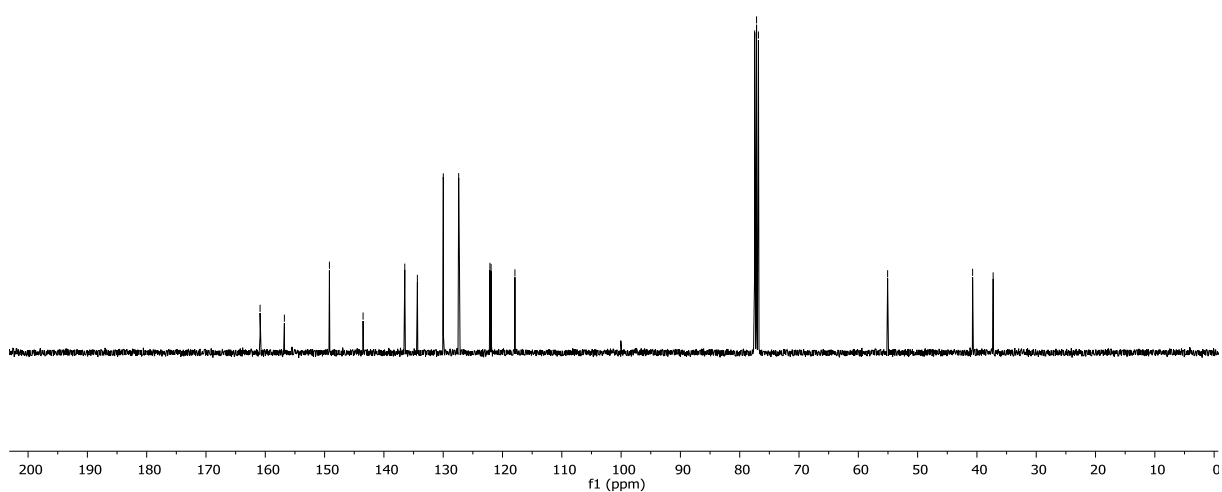

8c

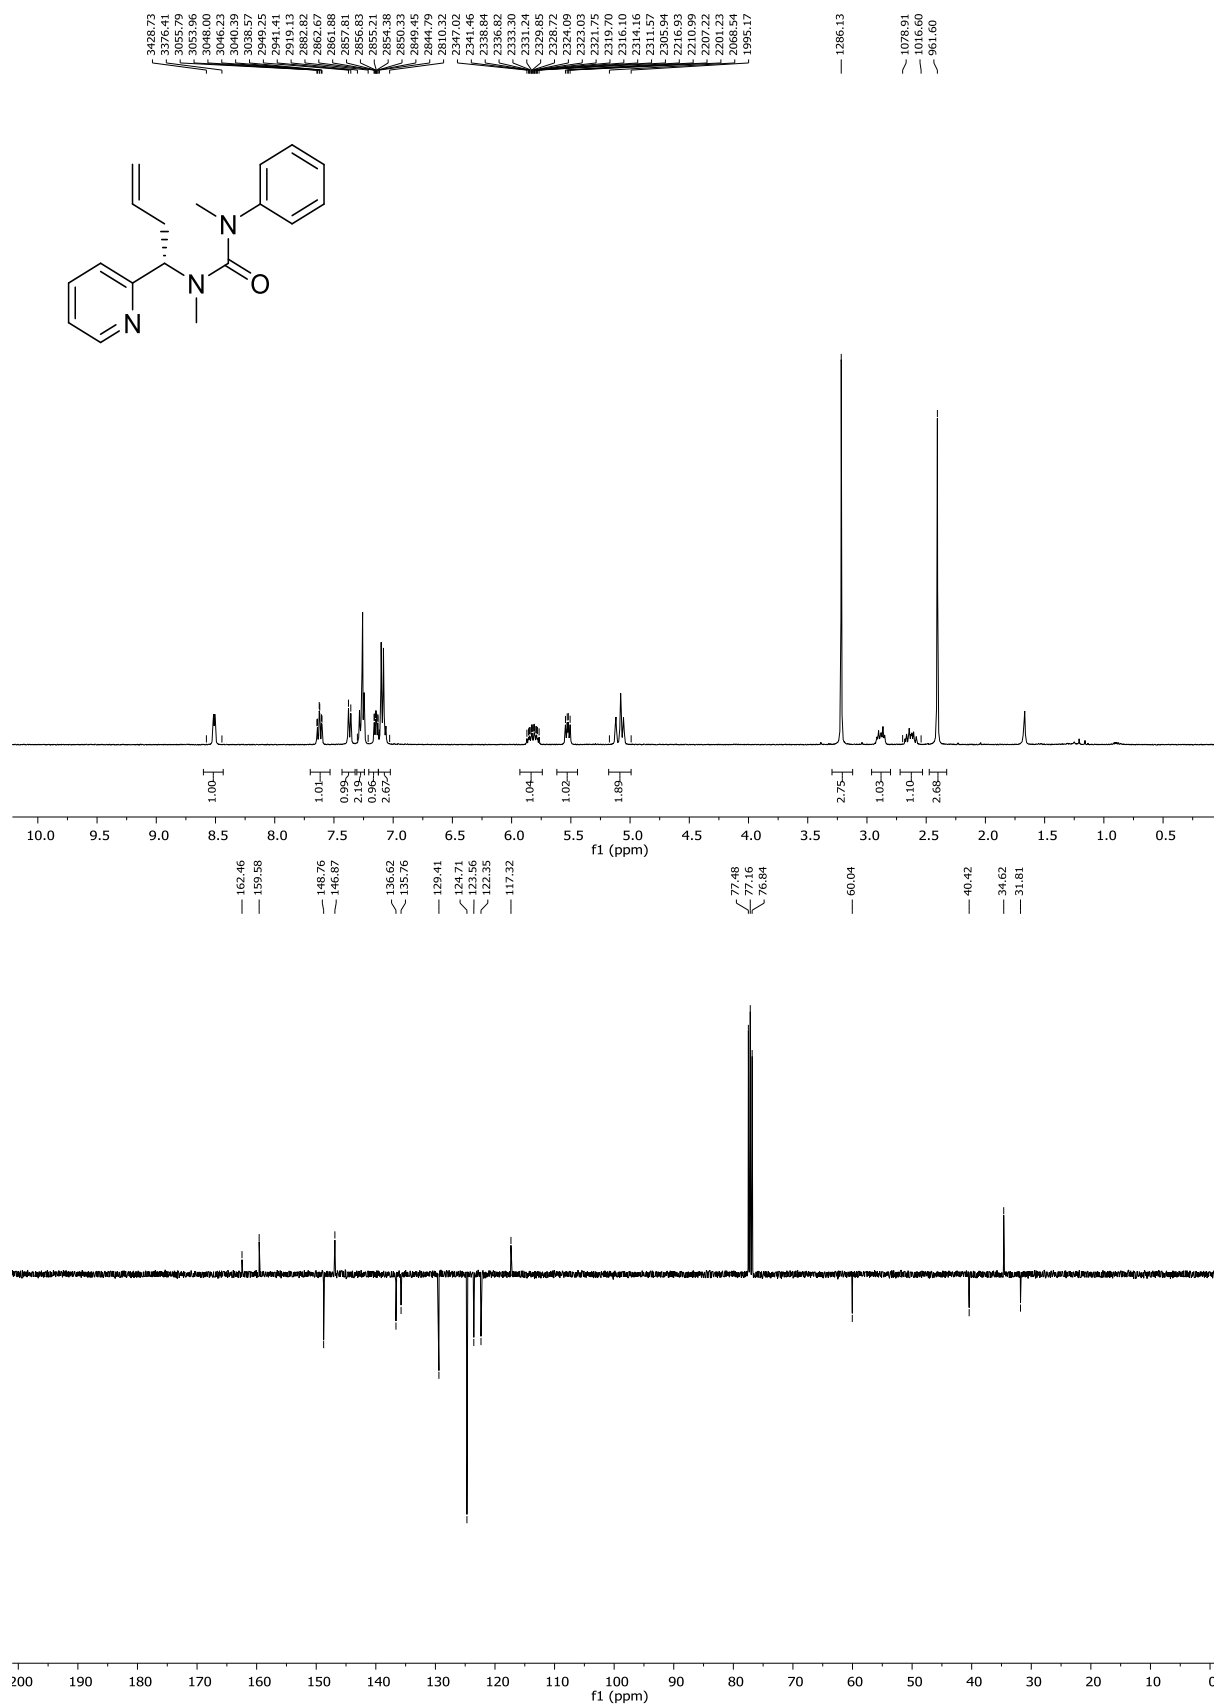

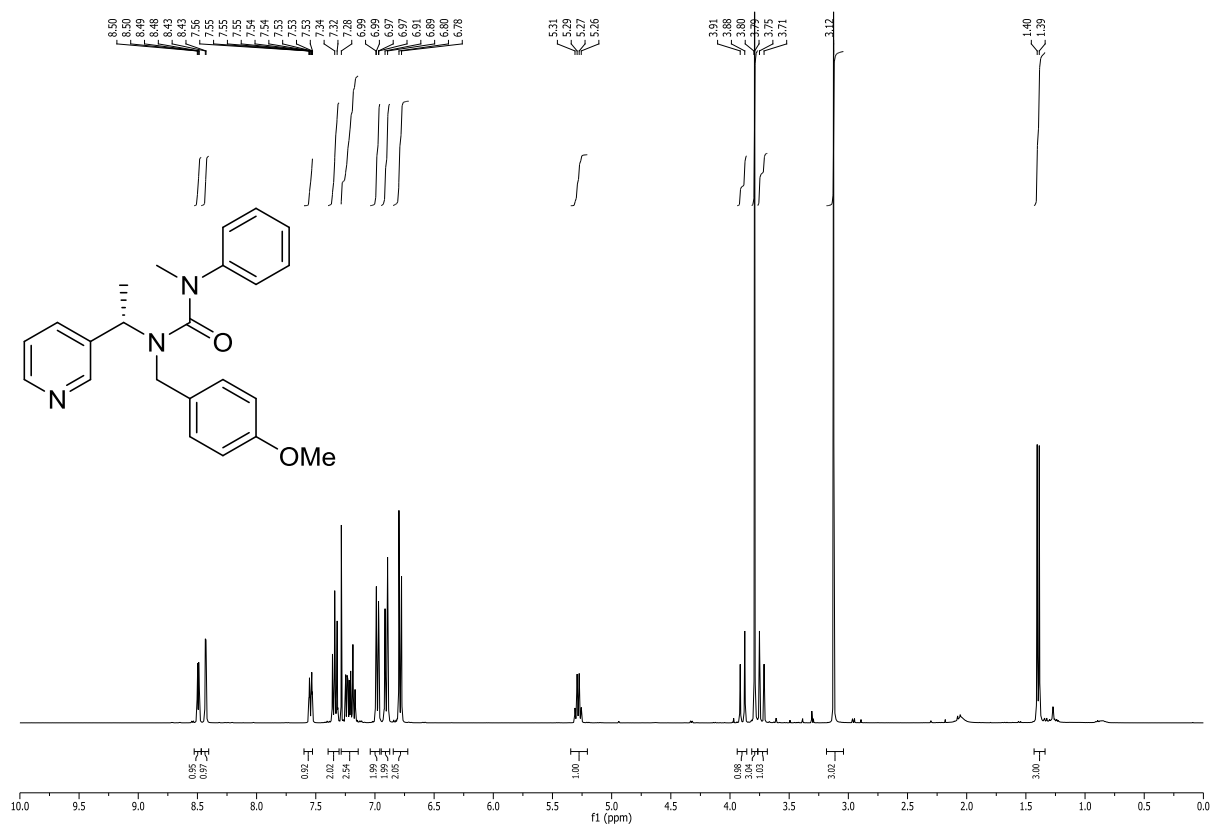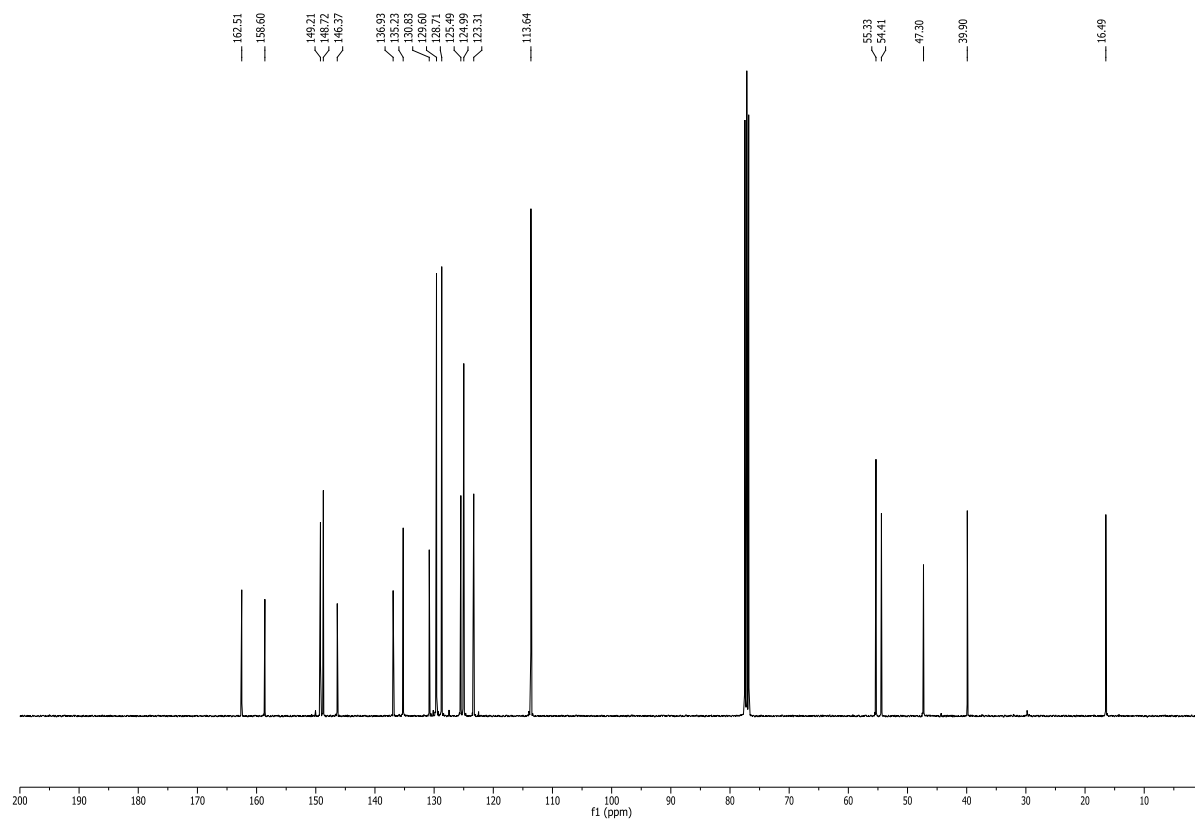

**10a**

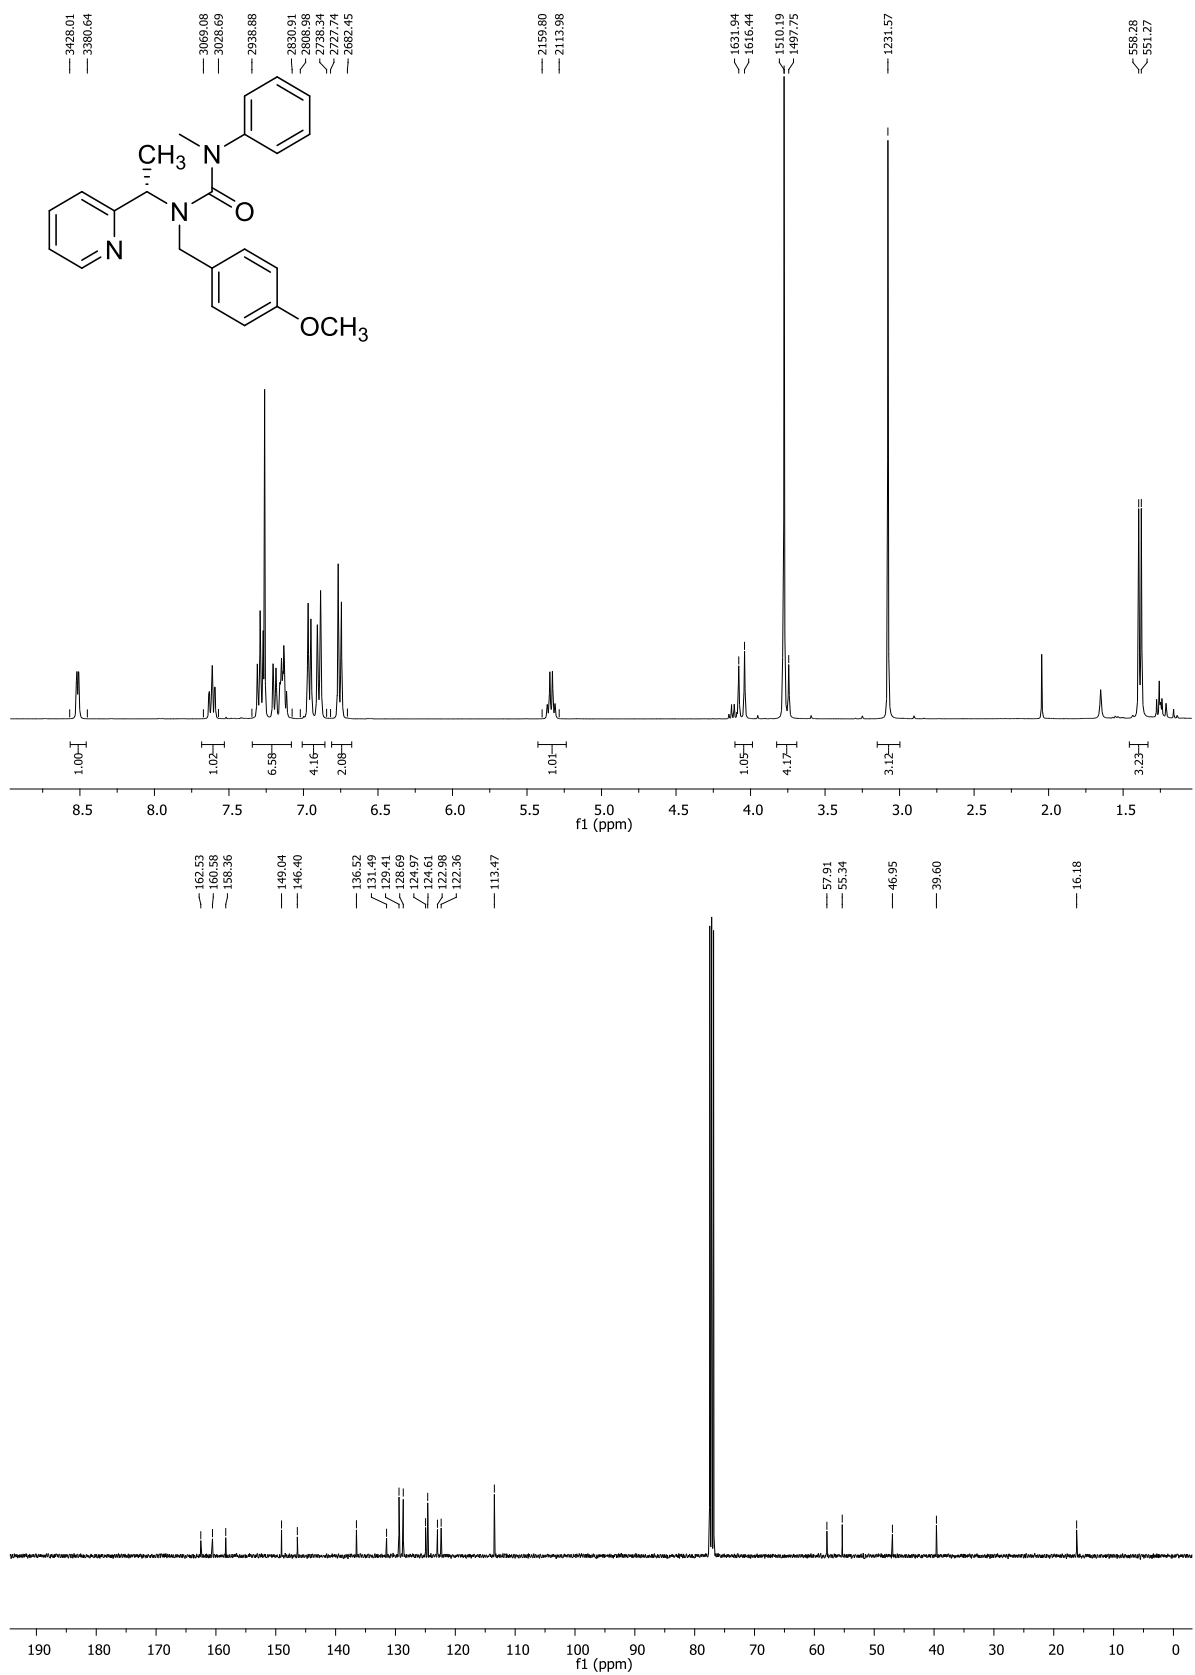

10b

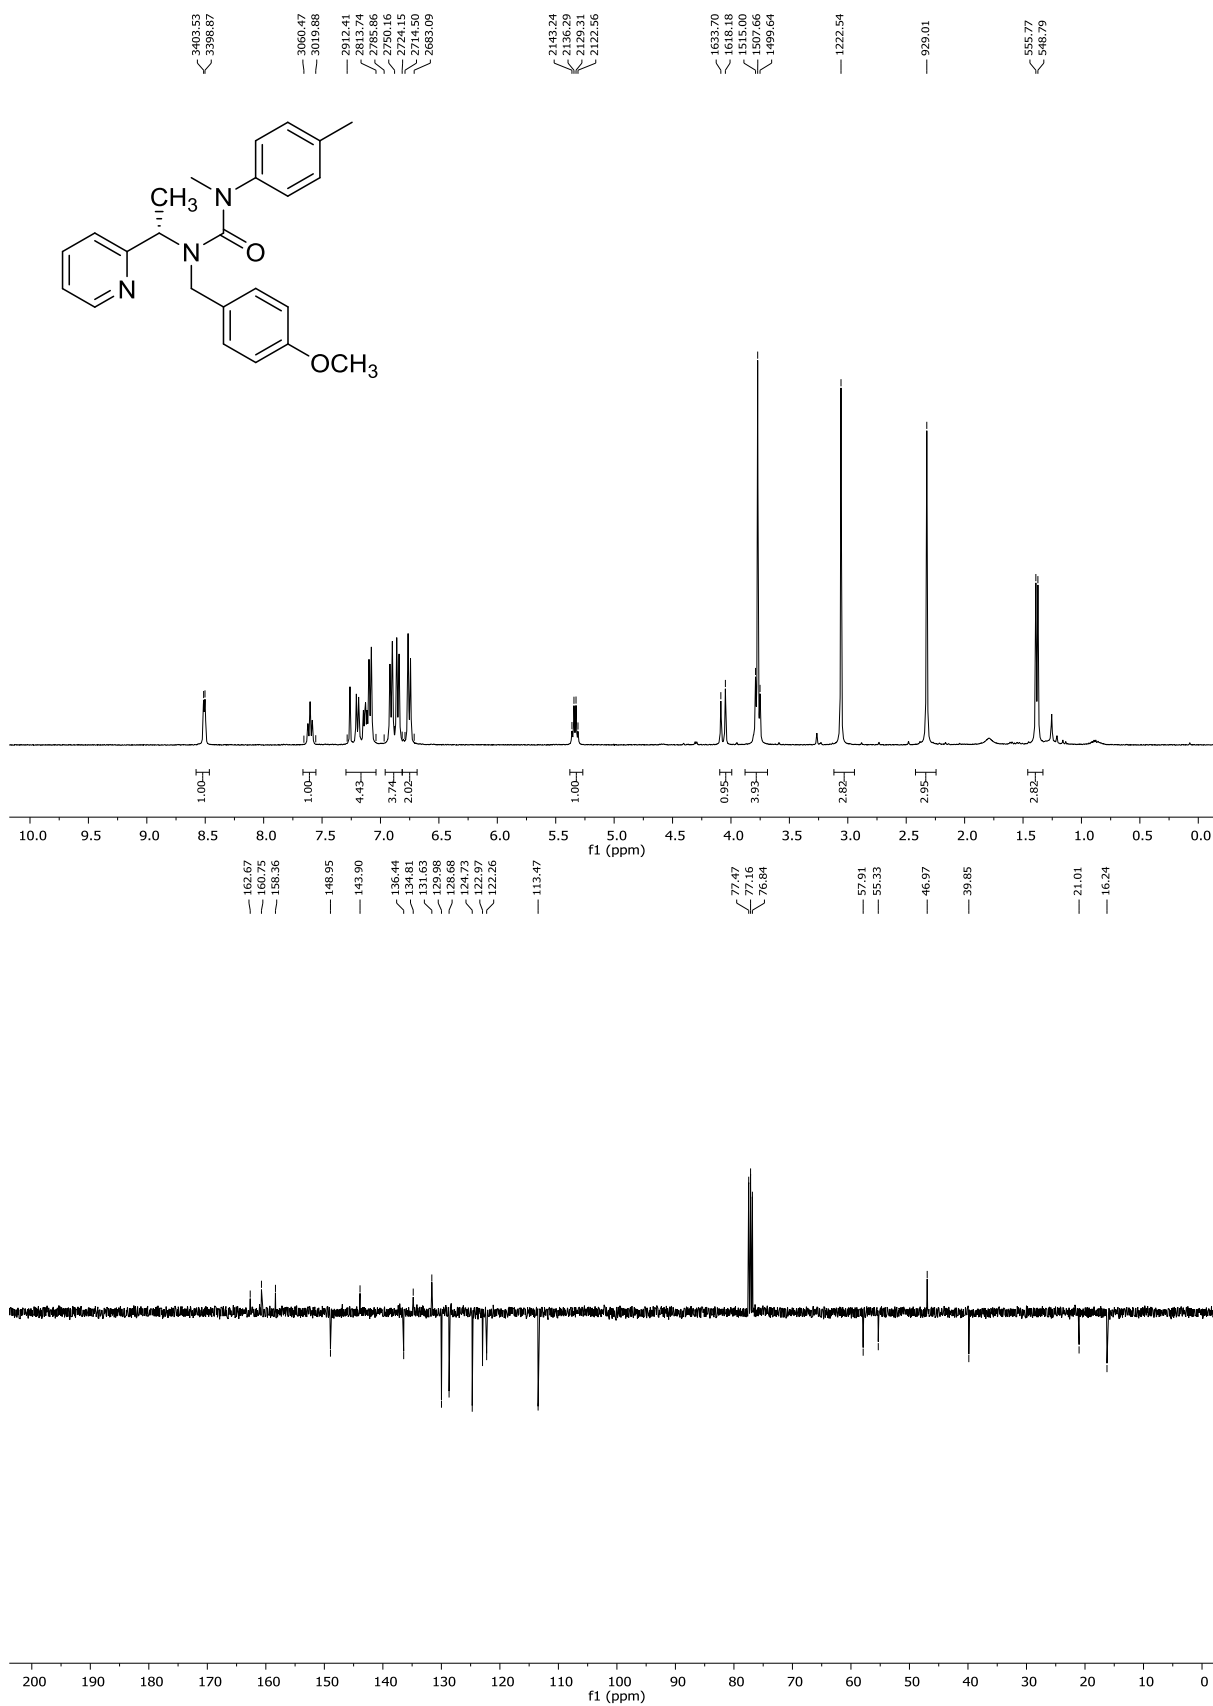

10c

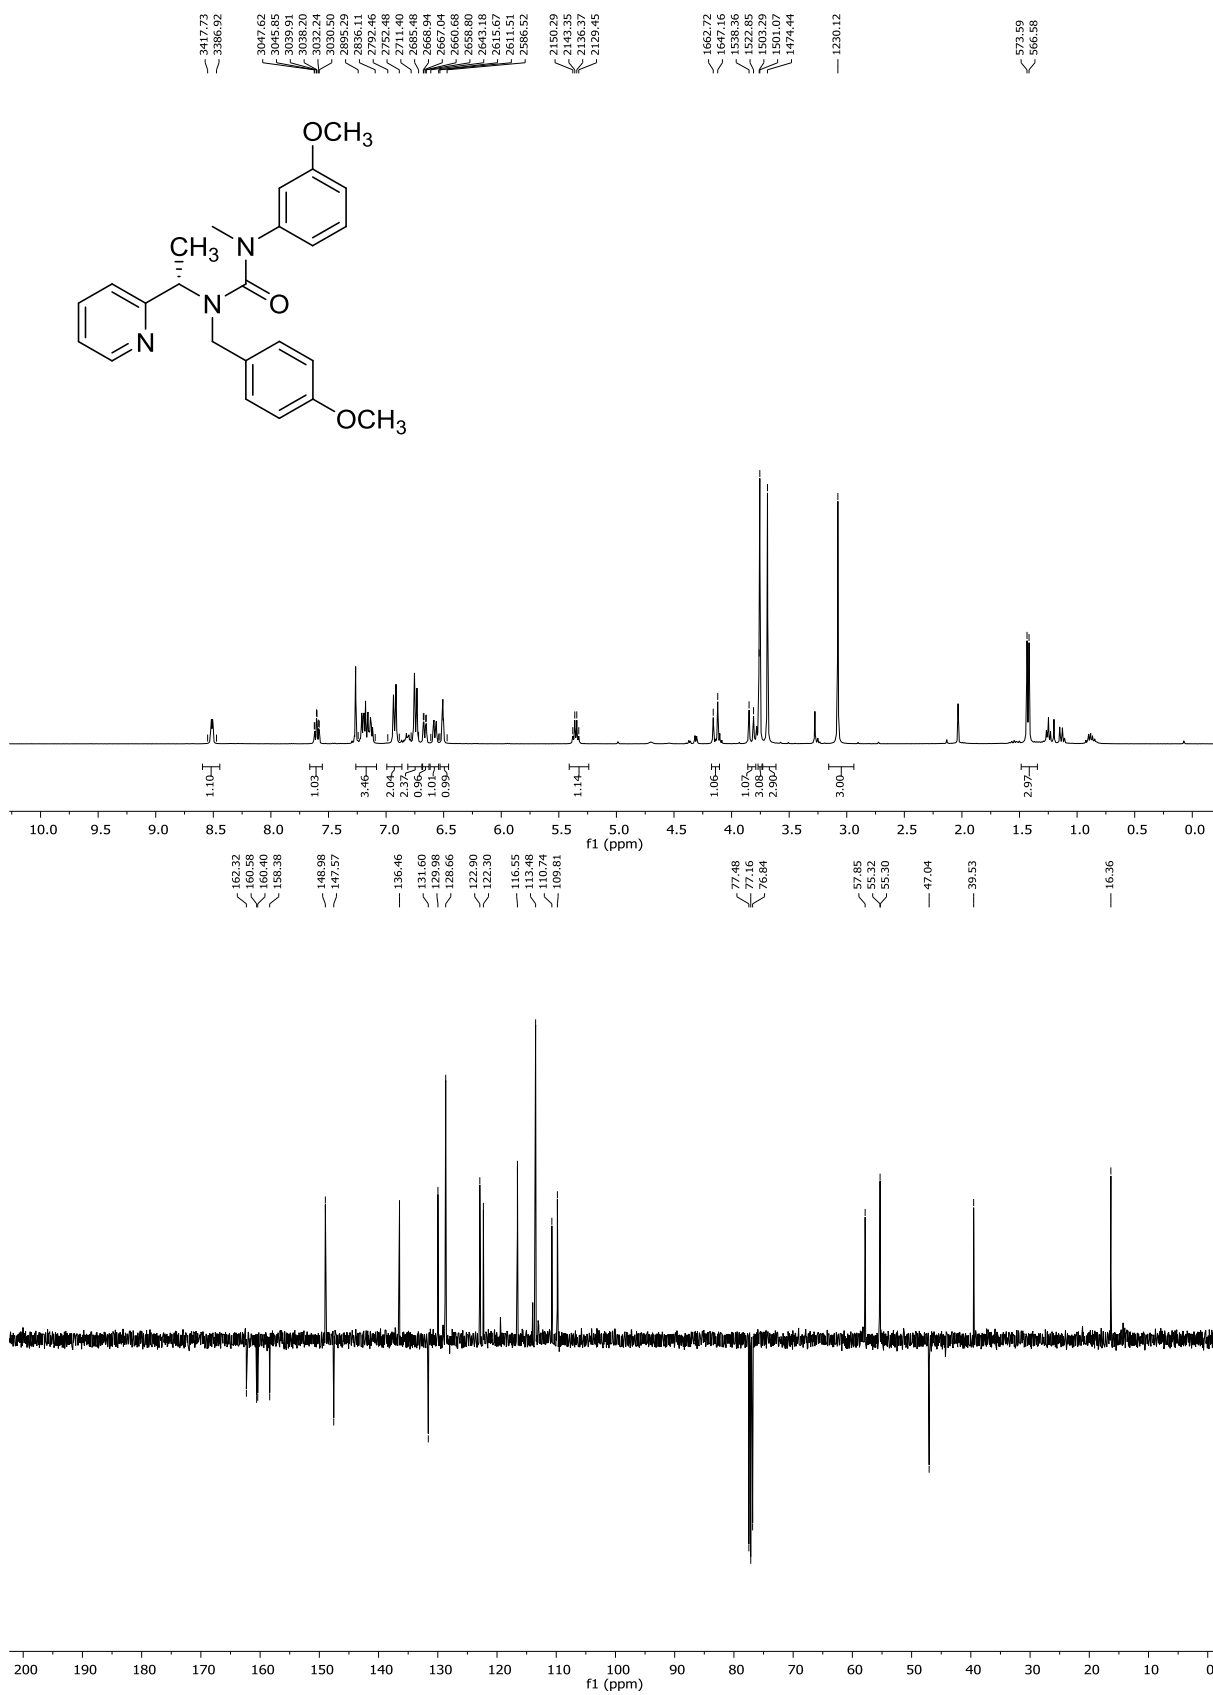

10d

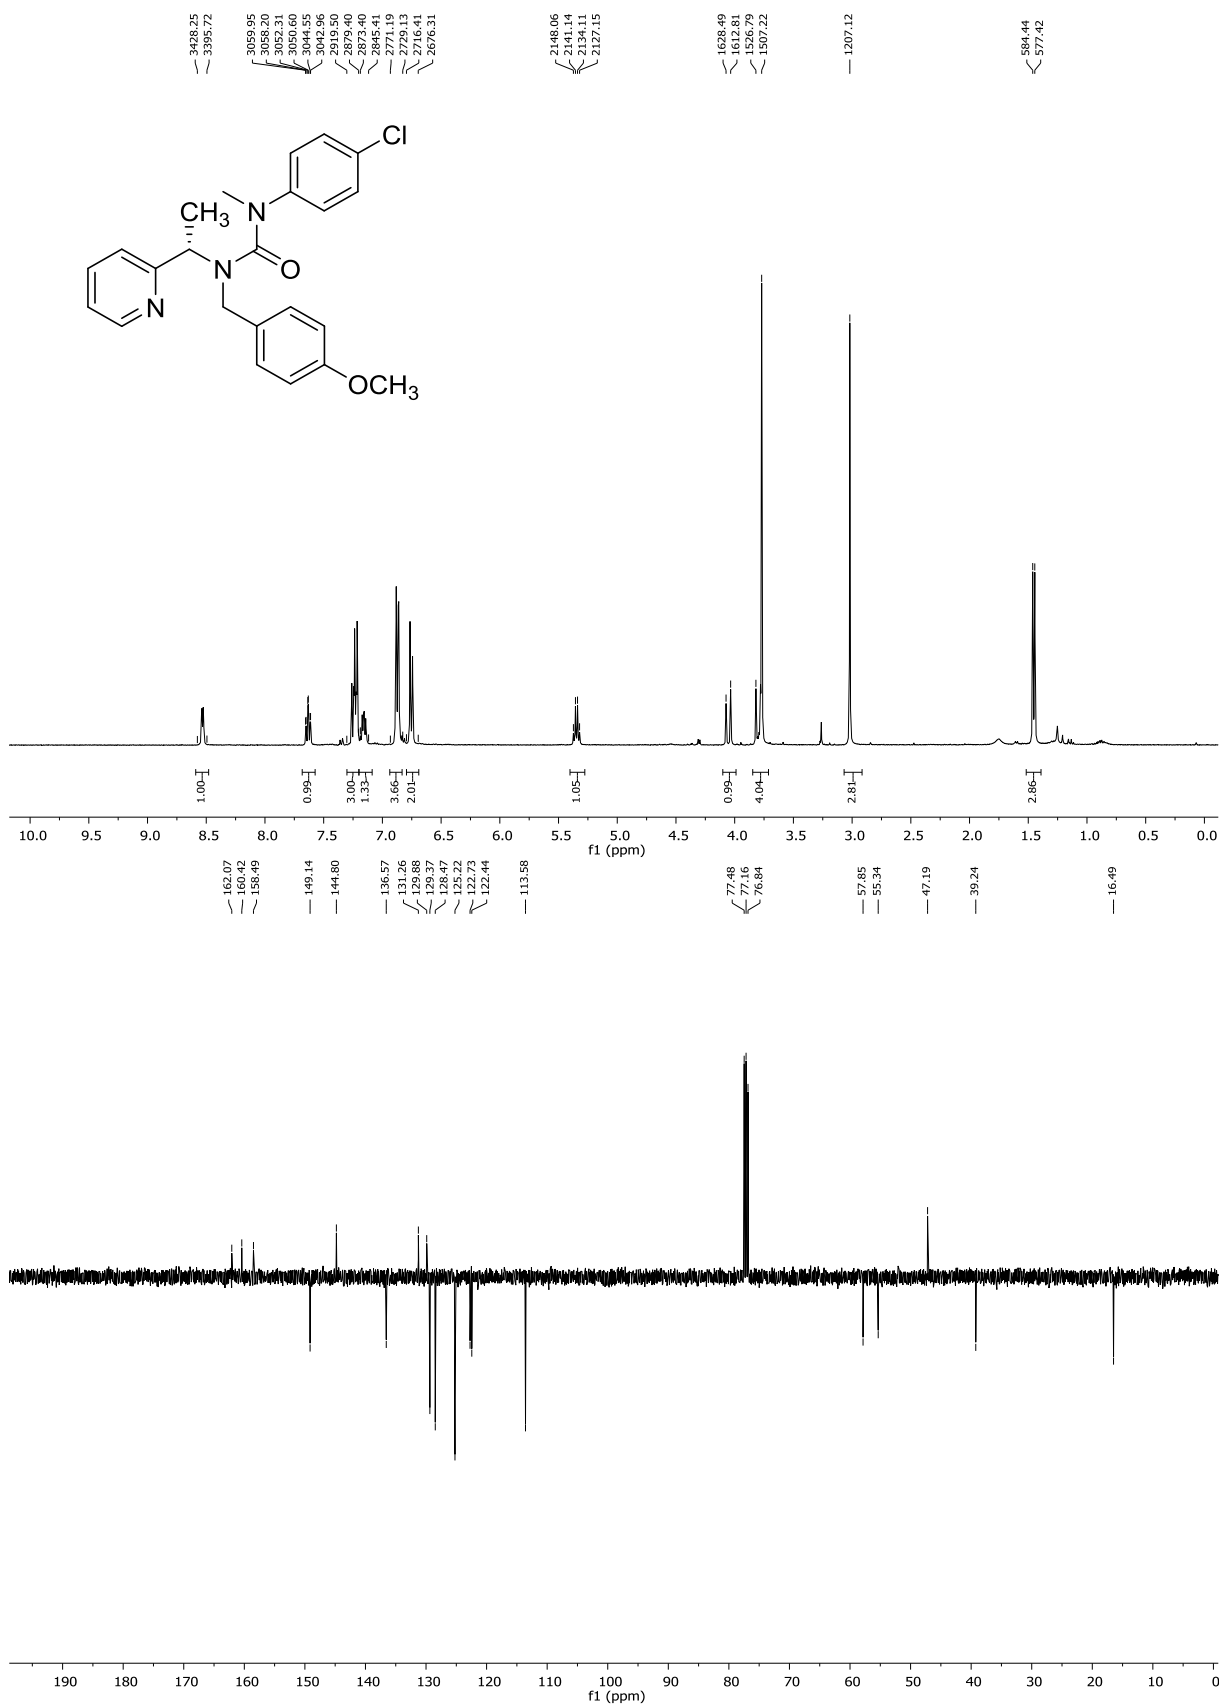

Chemical structure of compound 10: CN(C)C(=O)N(Cc1ccc(OC)cc1)C[C@H](c2ccncc2)C(=O)N(C)c3ccc(Cl)cc3

<sup>1</sup>H NMR spectrum (CDCl<sub>3</sub>) of compound 10. The x-axis represents the chemical shift in ppm (f1), ranging from 0.0 to 10.0. The spectrum shows several peaks, with integration values provided below the baseline. A list of peak chemical shifts (ppm) is provided at the top.

Chemical shifts (ppm): 3444.71, 3410.51, 3069.06, 3067.23, 3061.35, 3059.53, 3053.67, 3051.87, 2831.63, 2830.75, 2829.70, 2828.82, 2821.70, 2820.82, 2737.51, 2736.62, 2735.36, 2734.47, 2729.41, 2728.58, 2727.48, 2726.58, 2725.68, 2147.26, 2140.25, 2133.33, 1618.48, 1602.83, 1533.82, 1518.17, 1511.27, 1209.46, 594.77, 587.74.

Integration values (from left to right): 1.00, 1.02, 4.47, 1.11, 1.01, 2.01, 1.21, 2.19, 1.07, 1.10, 4.56, 3.08, 3.45.

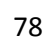



10g

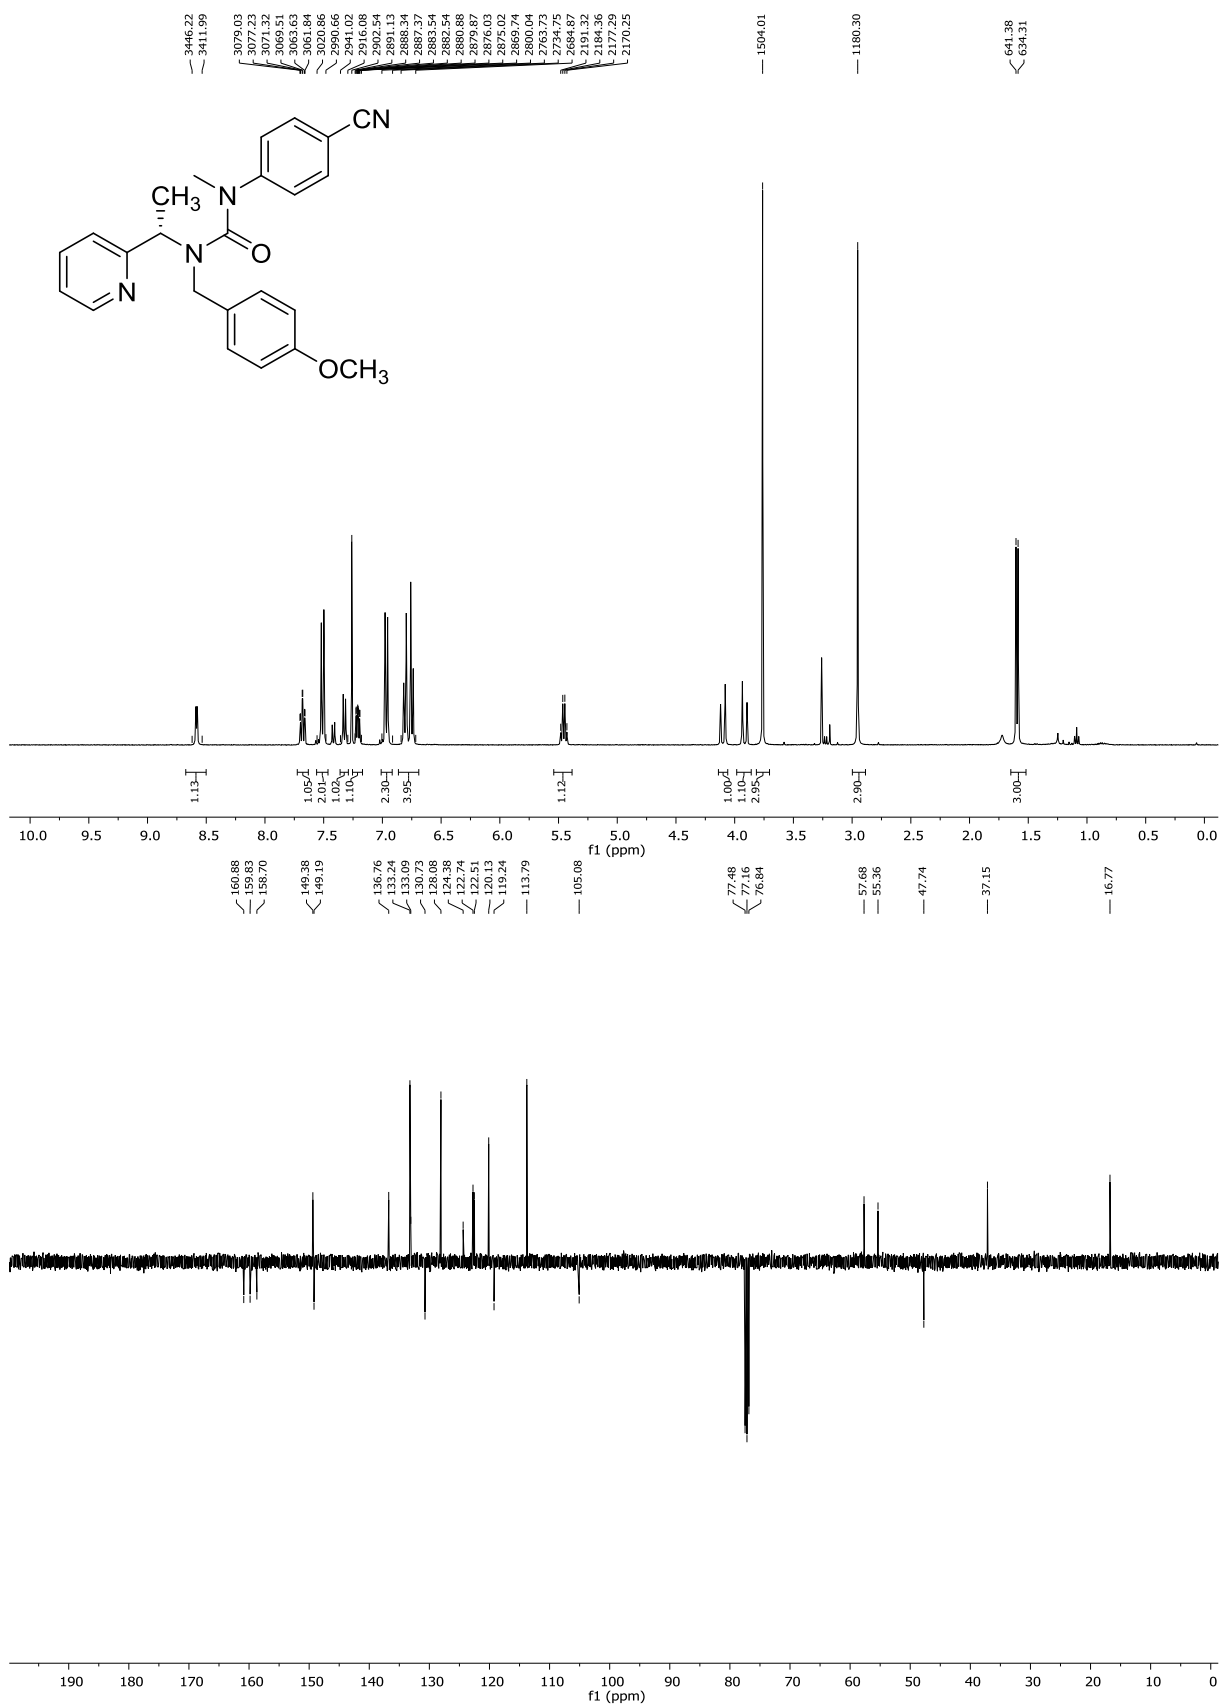

10h

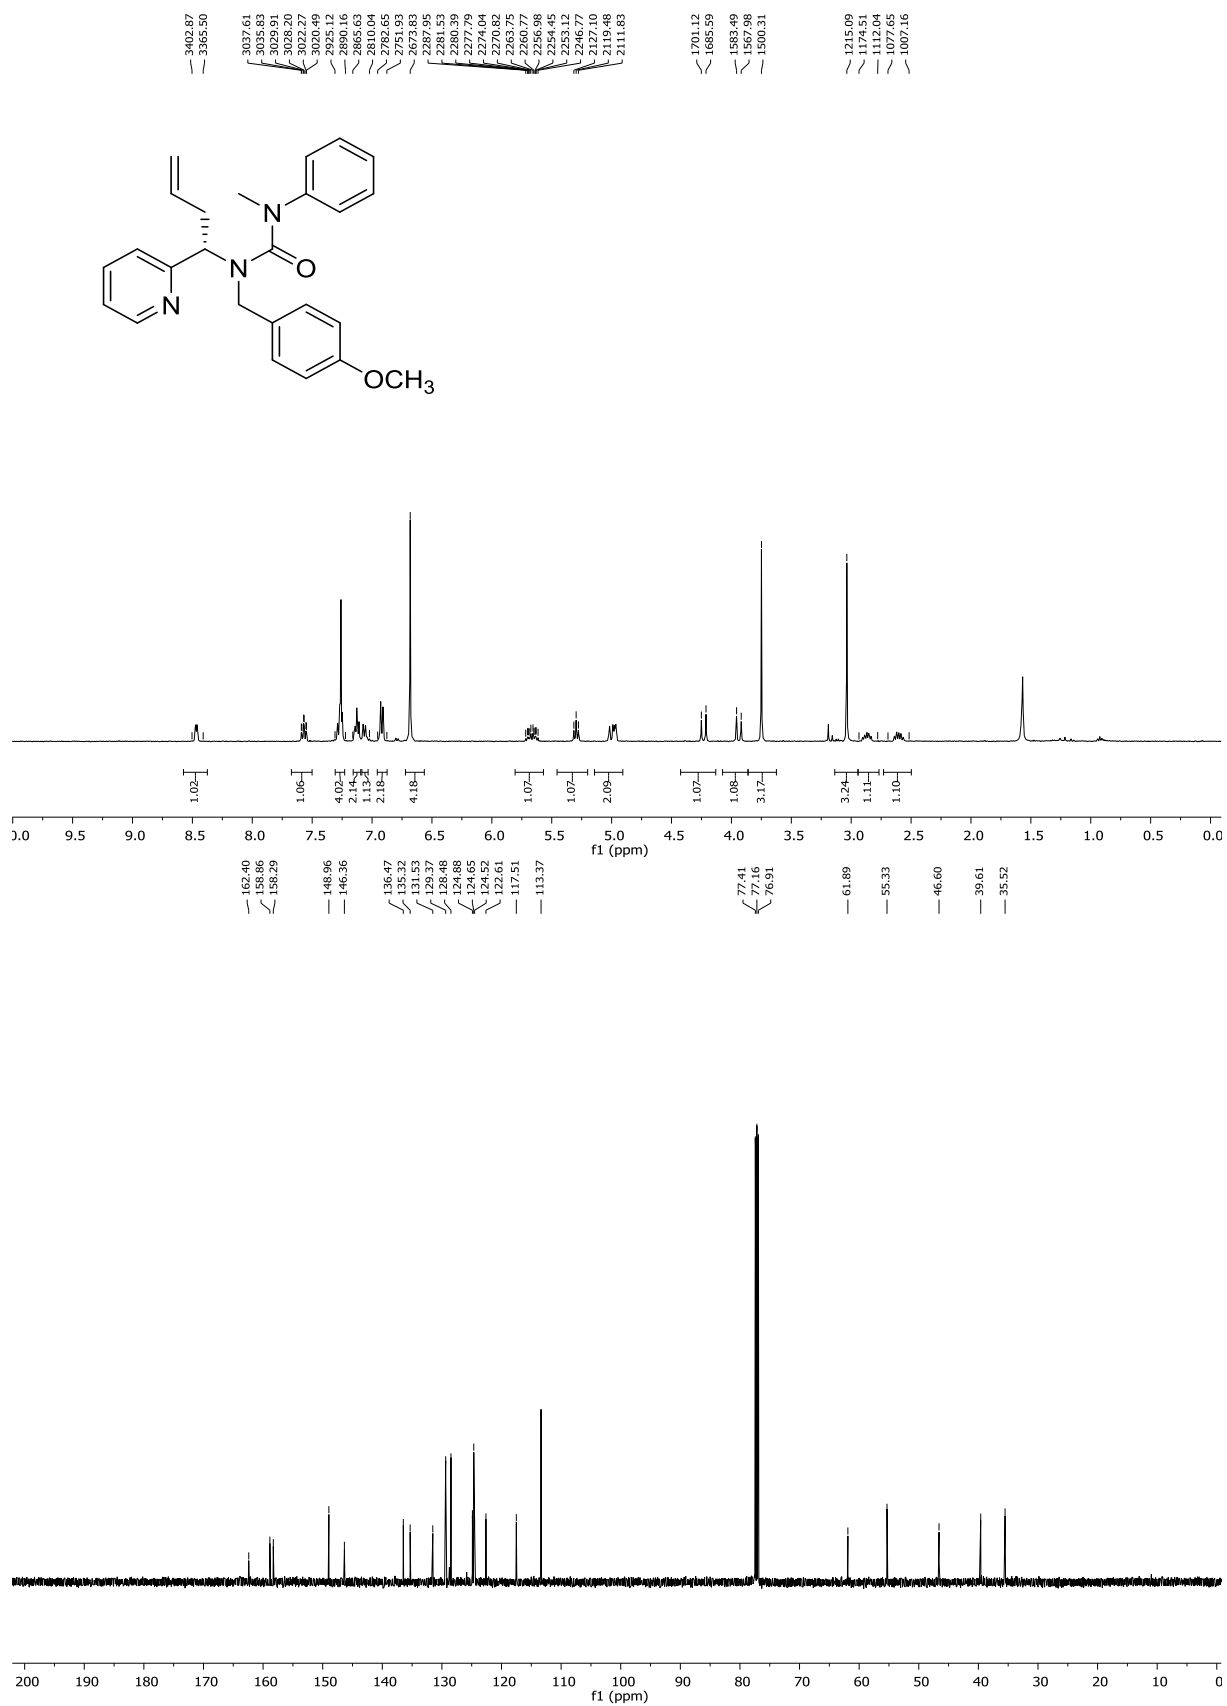

11a

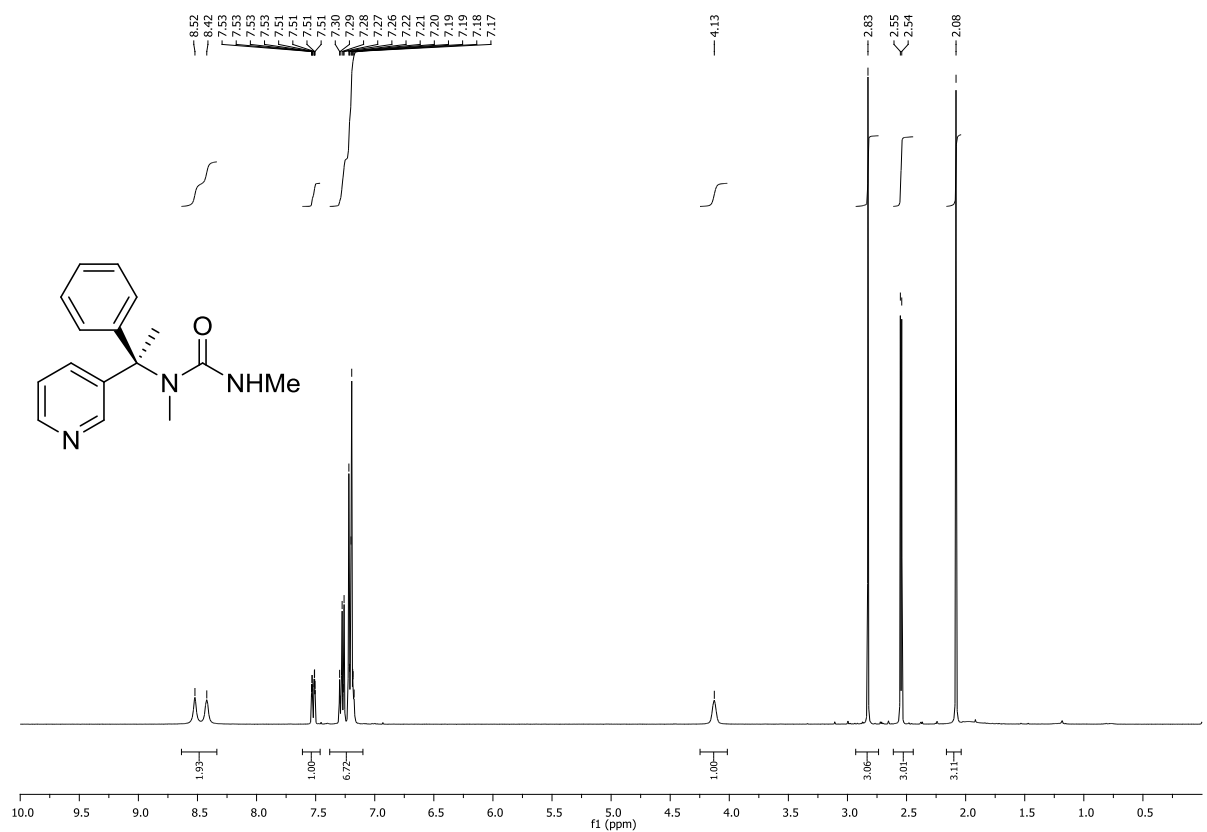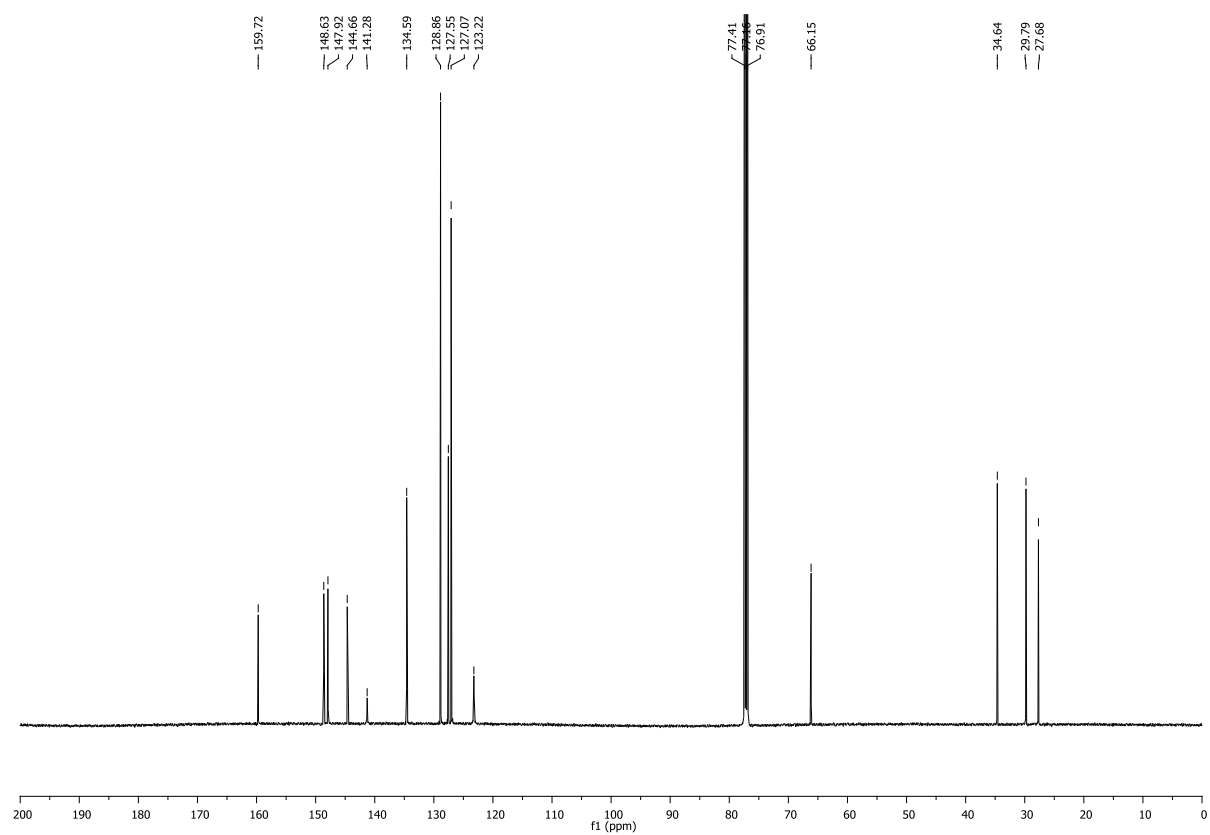

11b

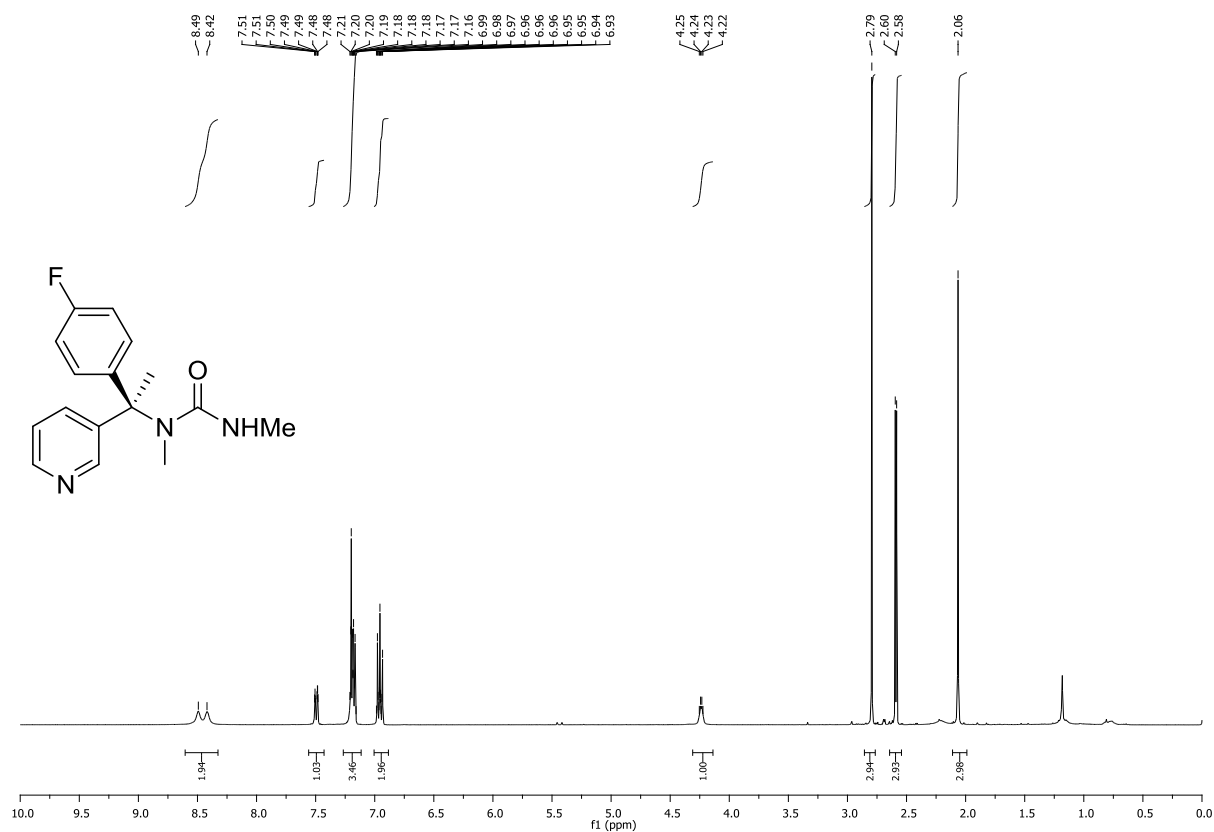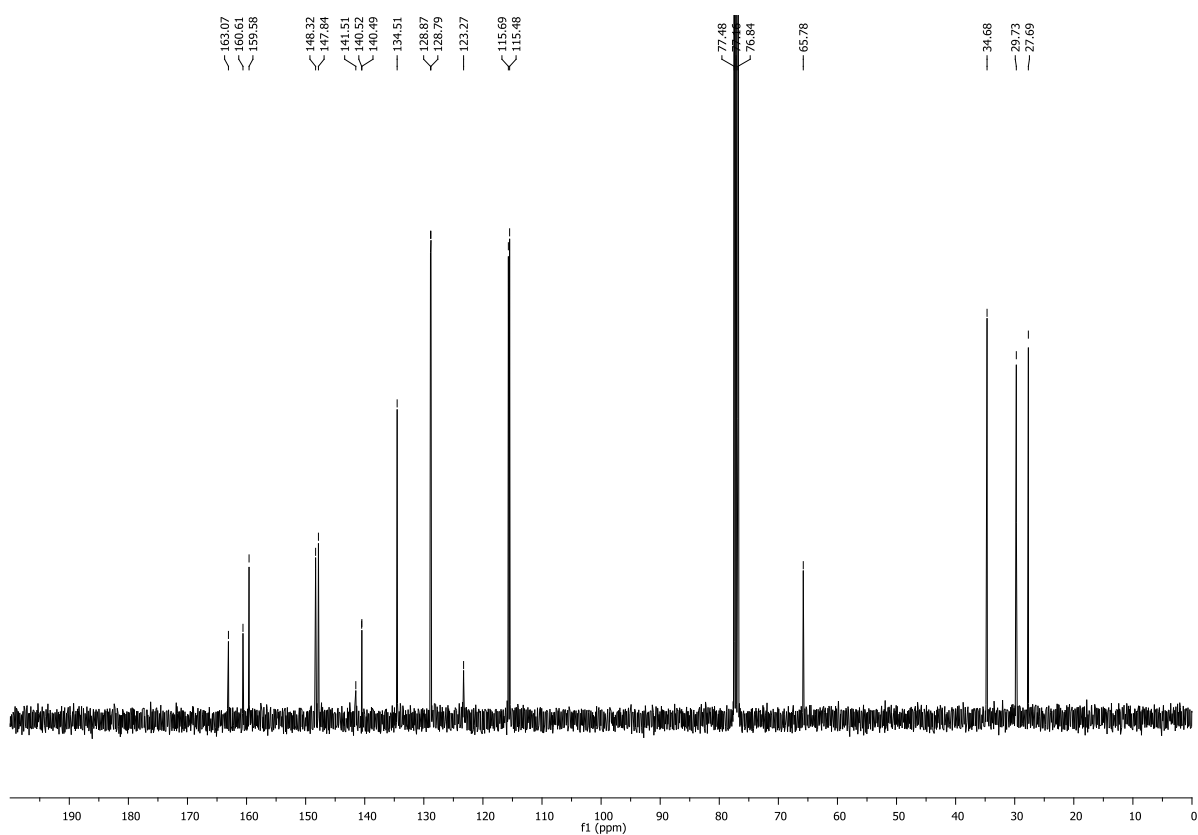

11c

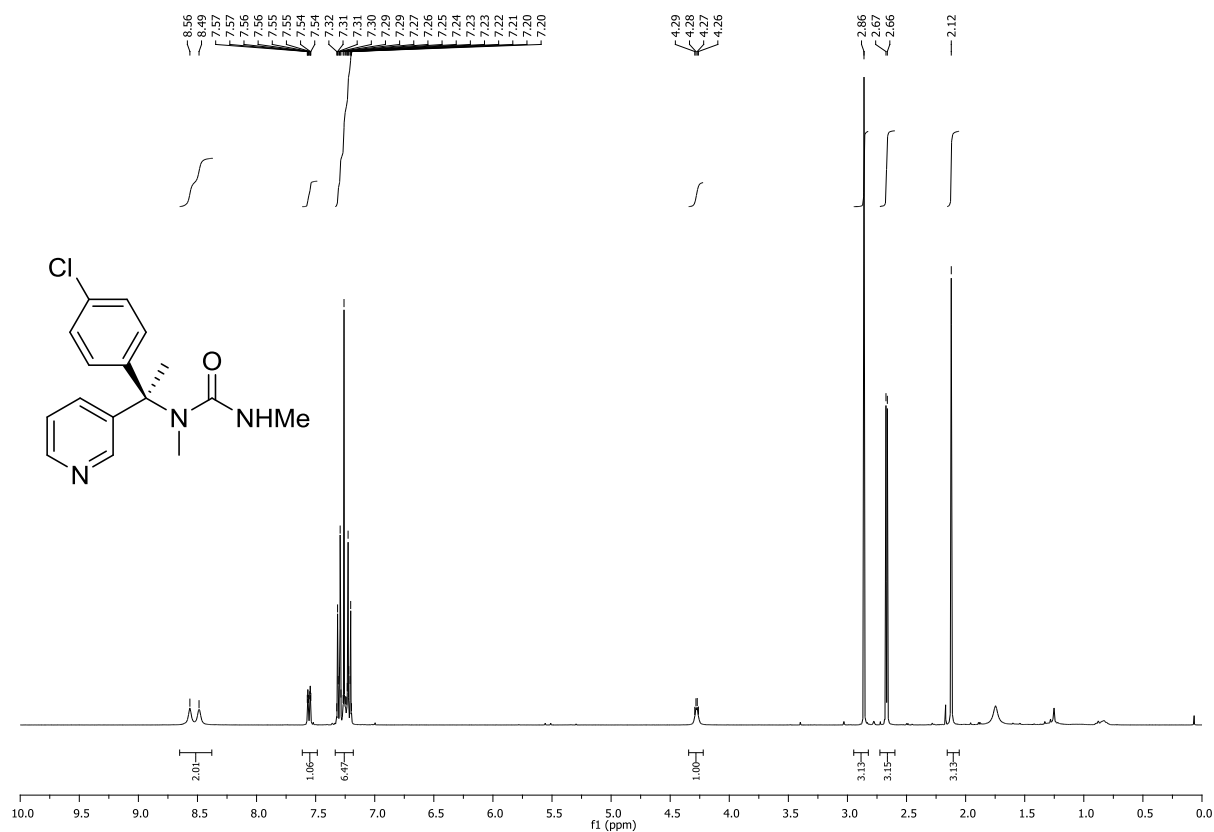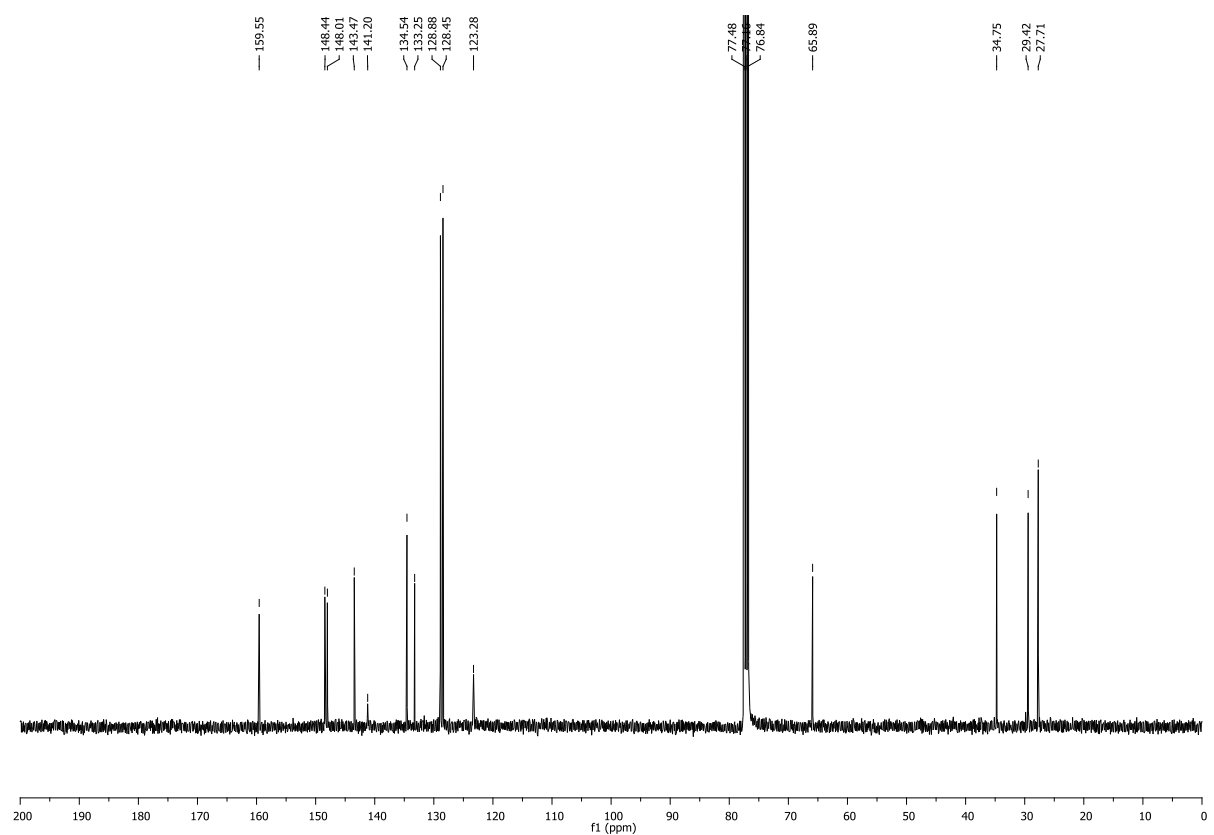

11d

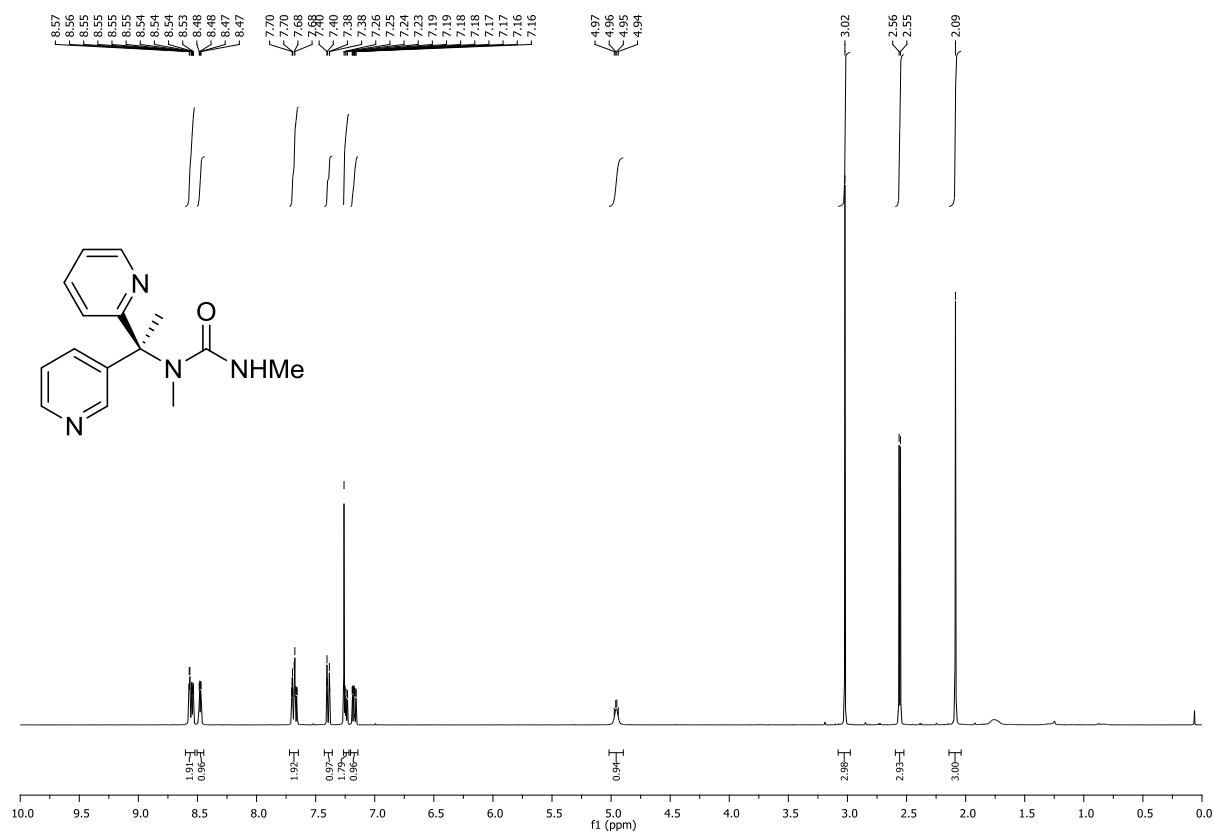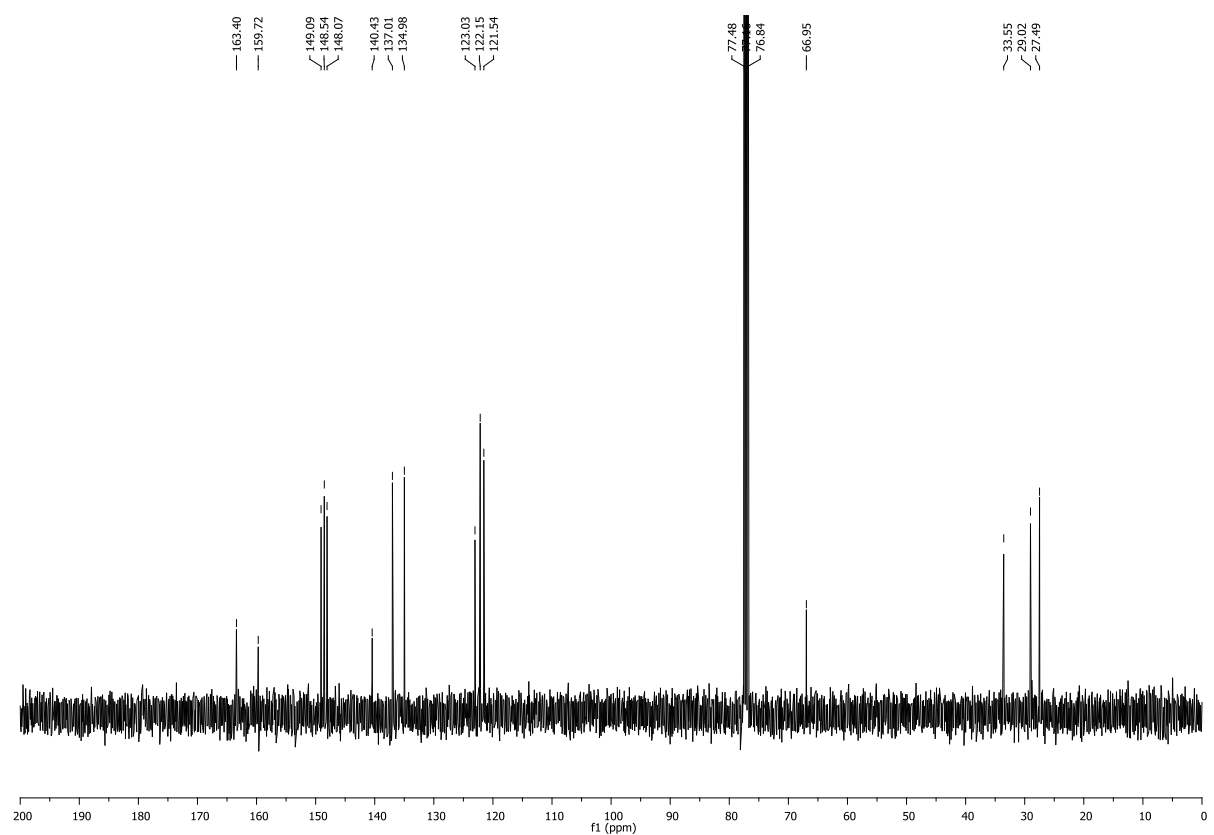

11e

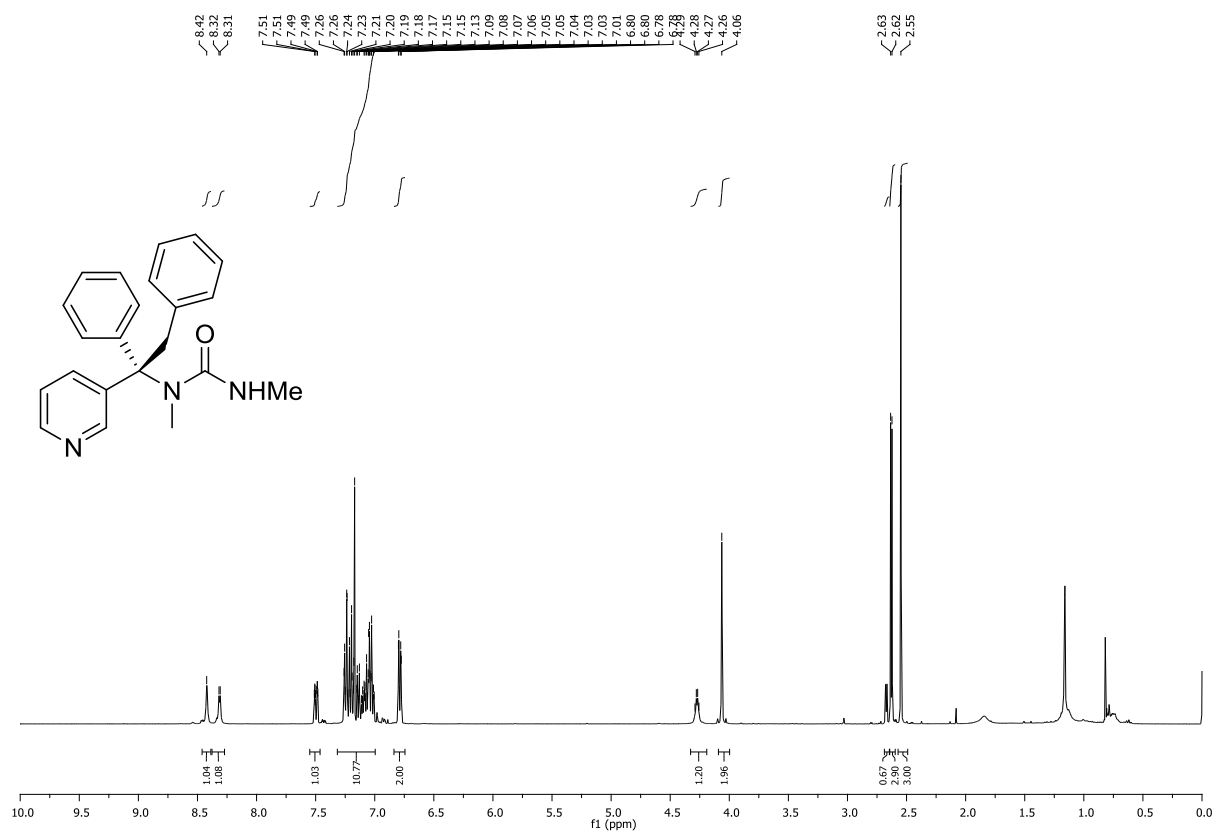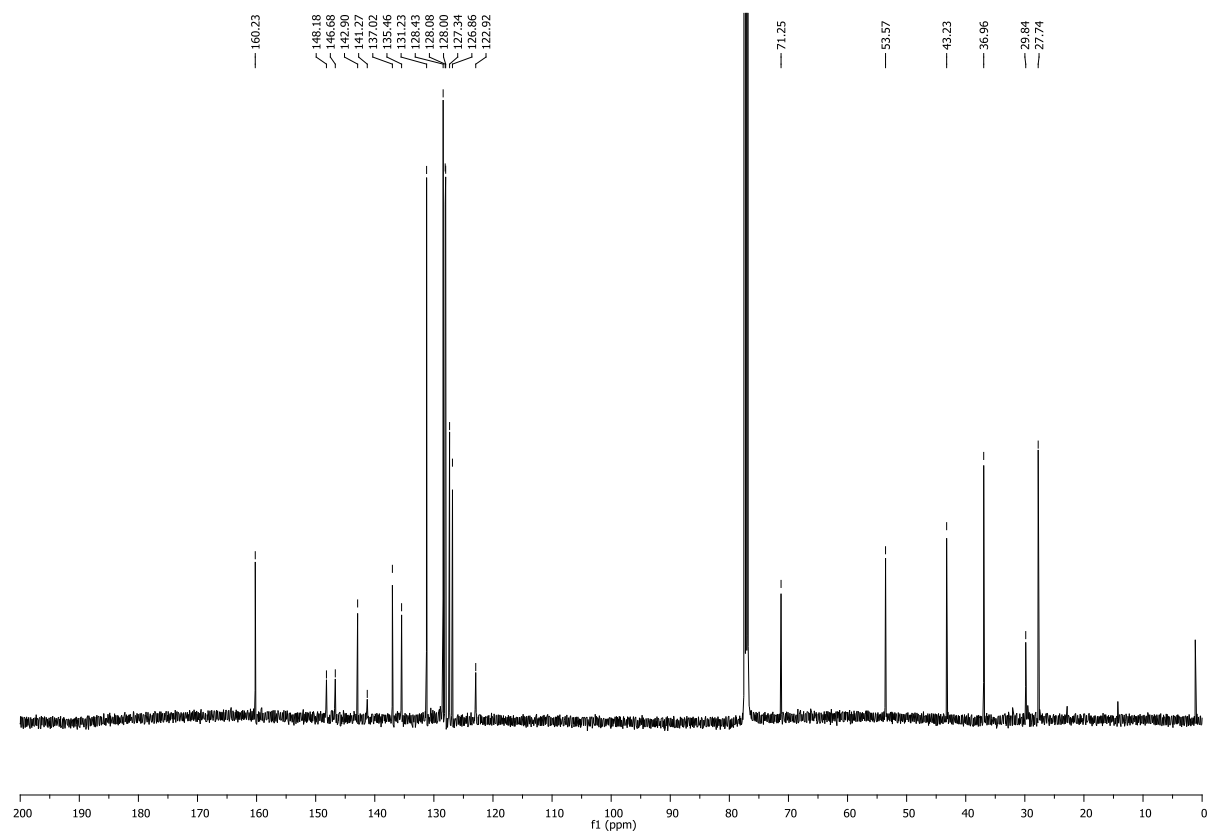

11f

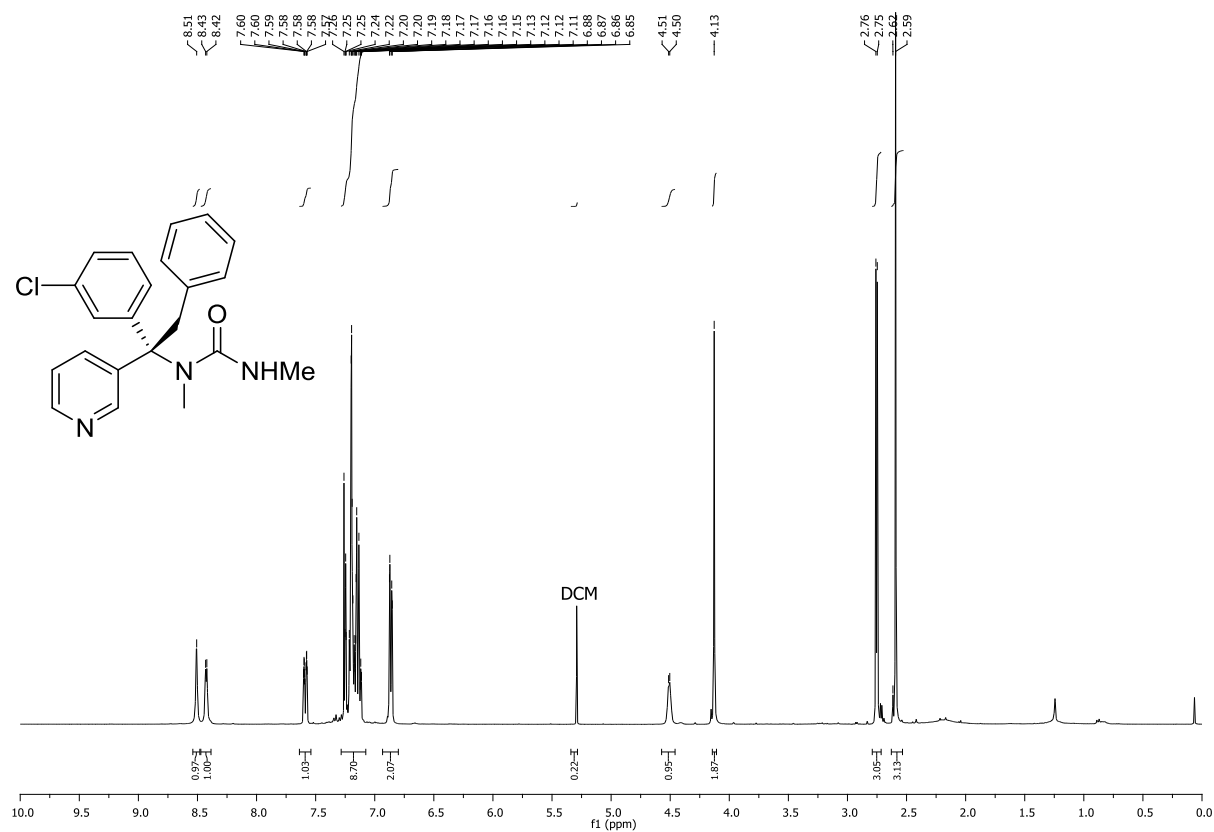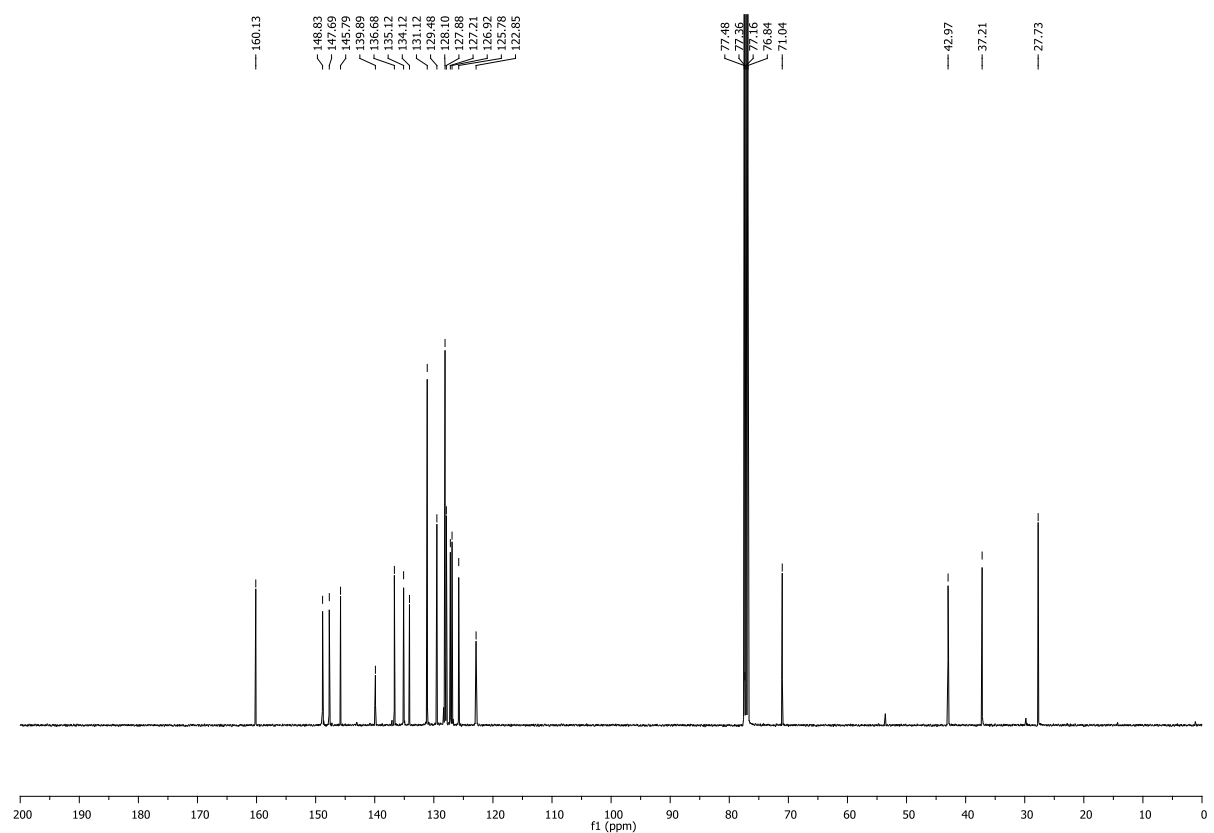

11g

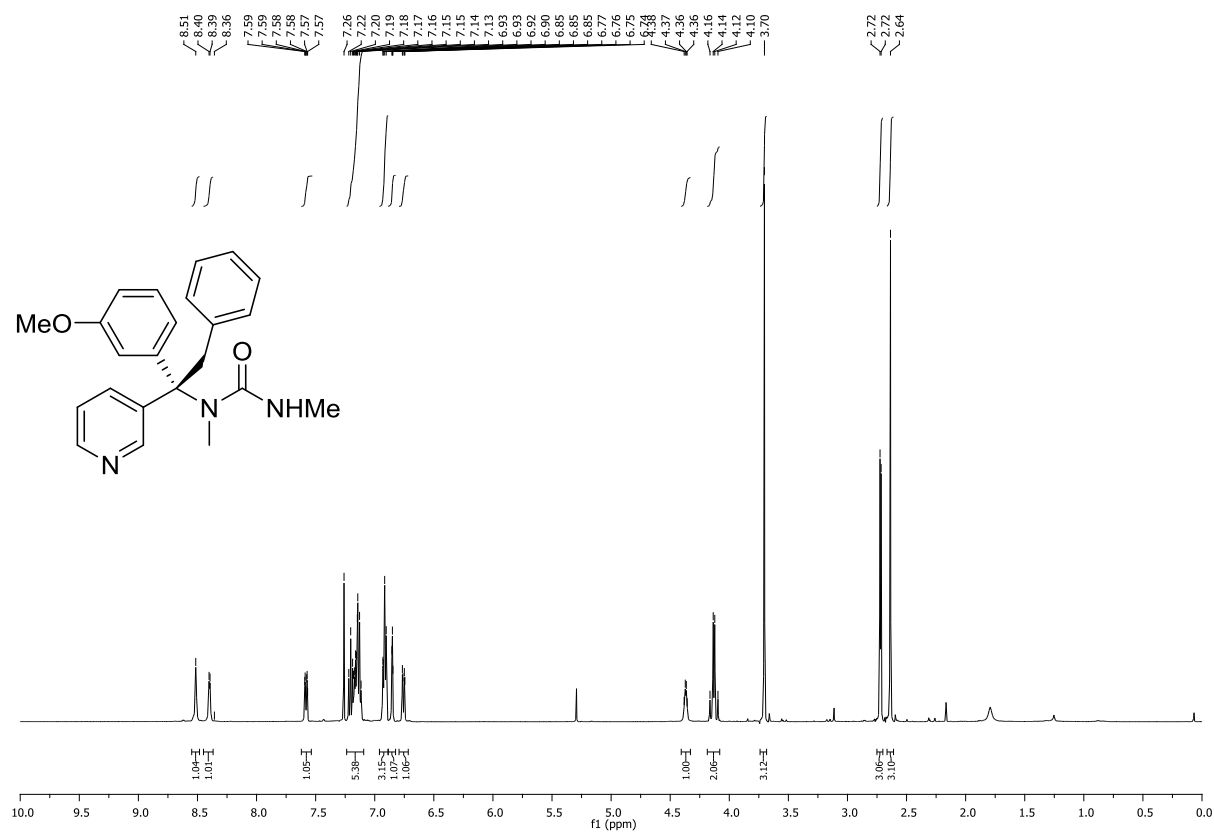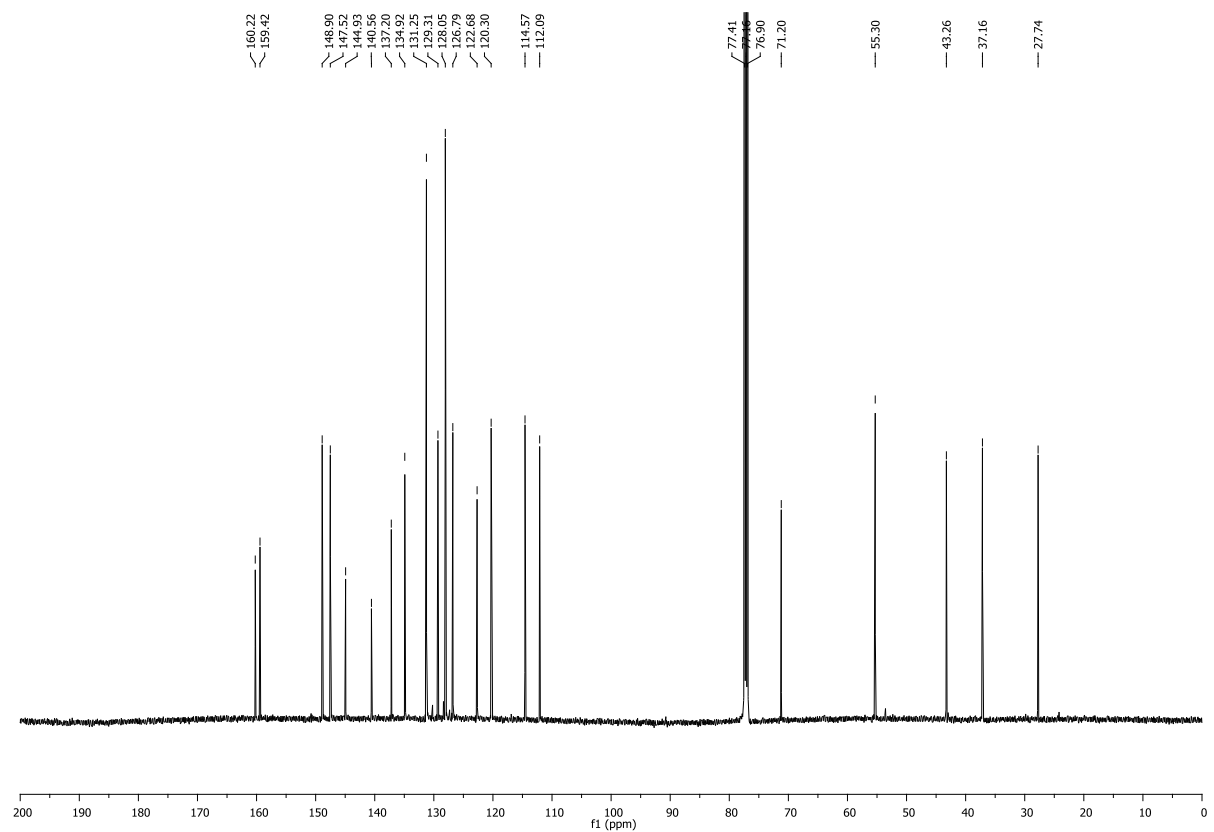

11h

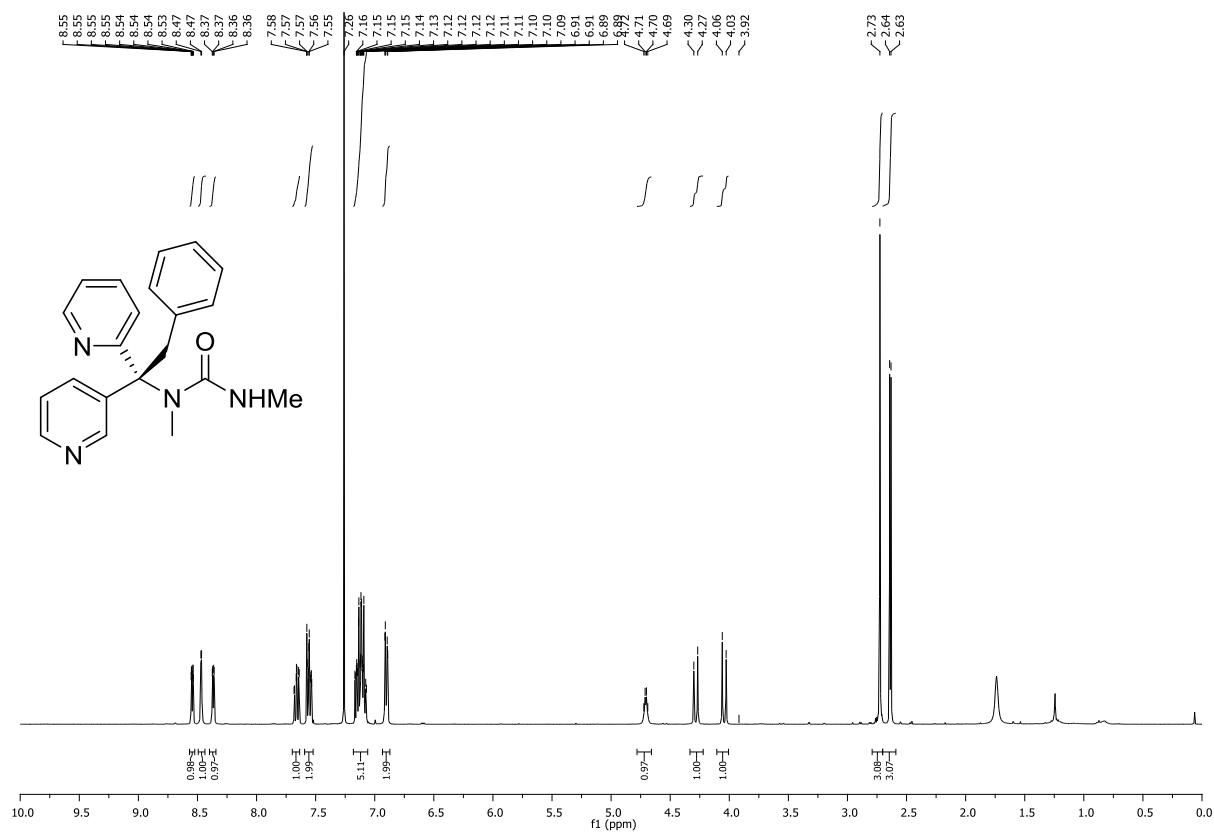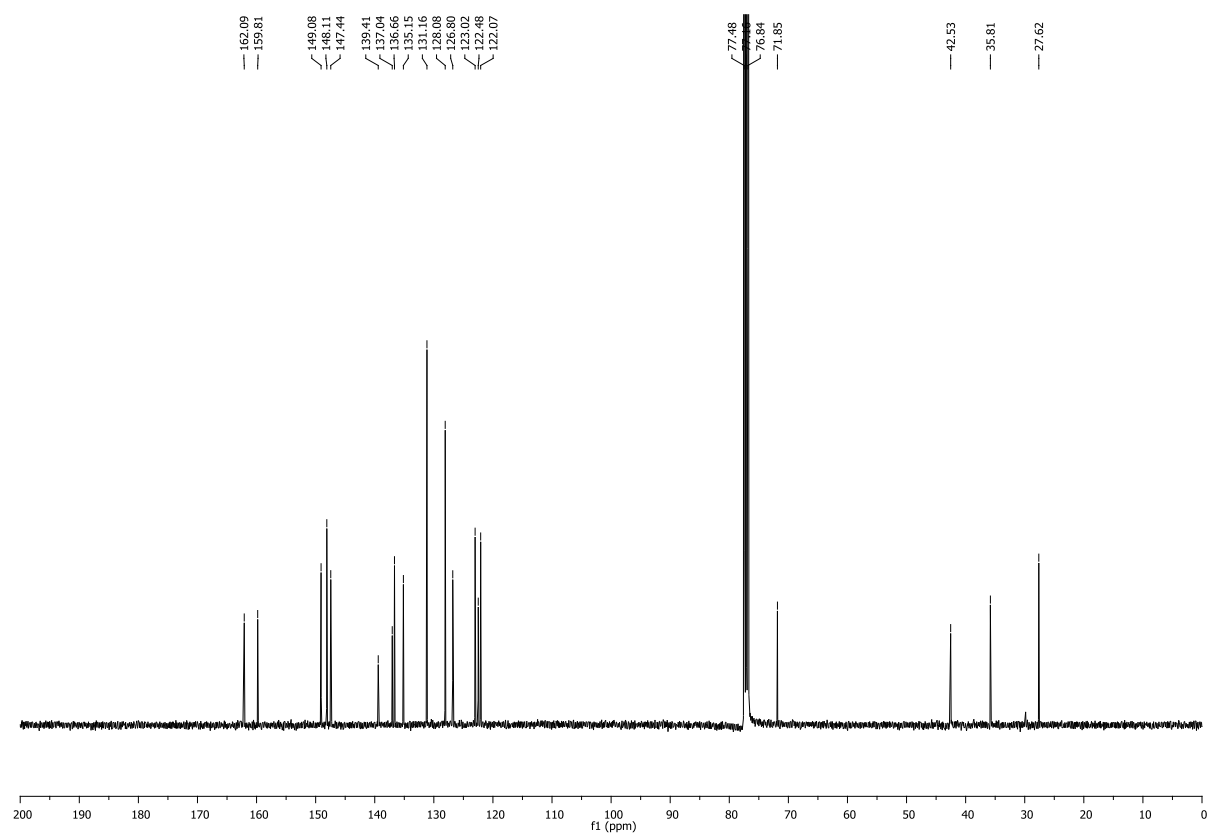

**12b**

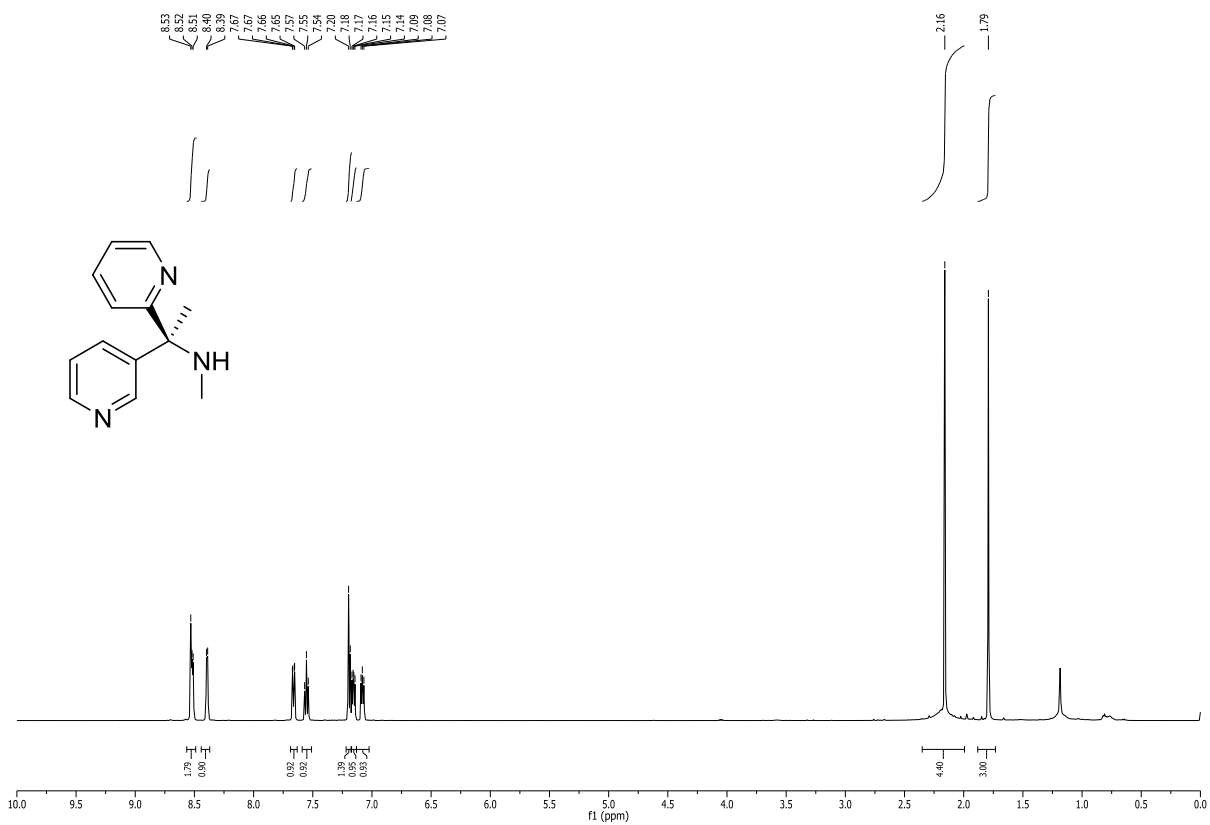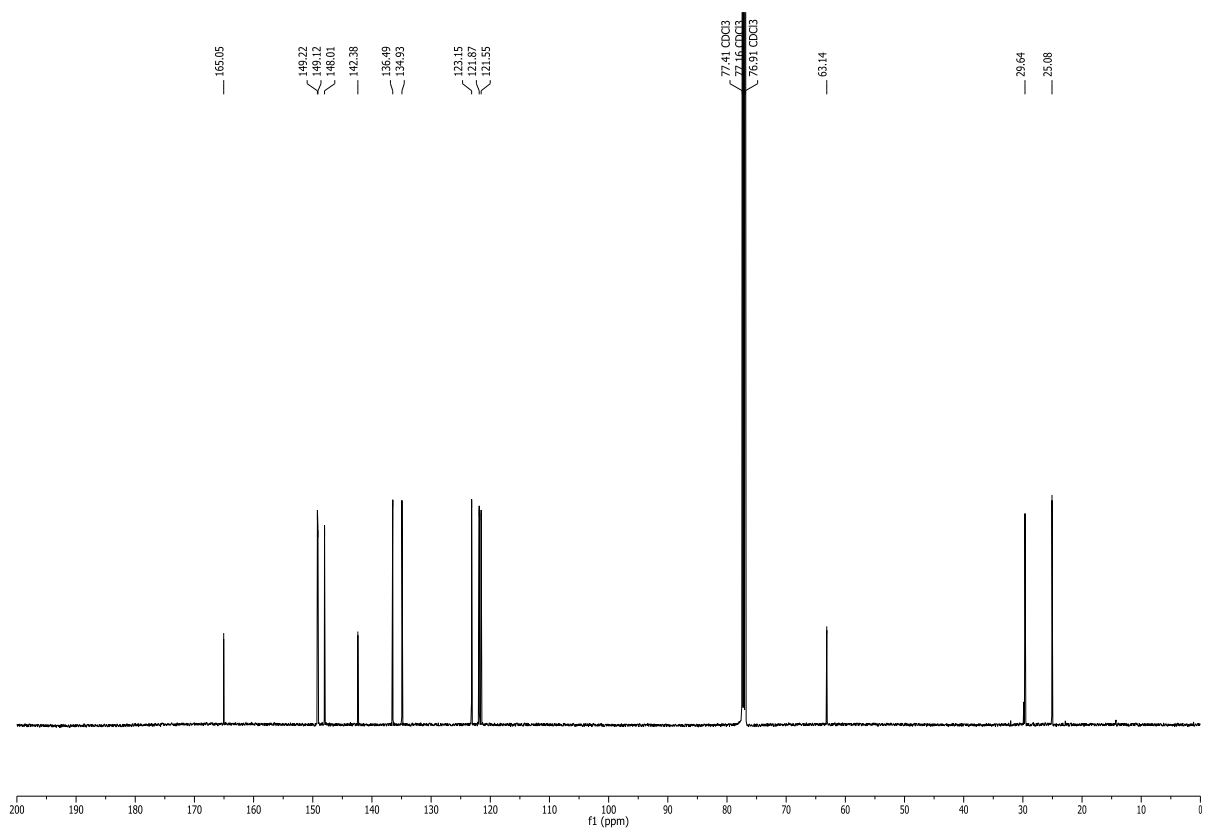

12d

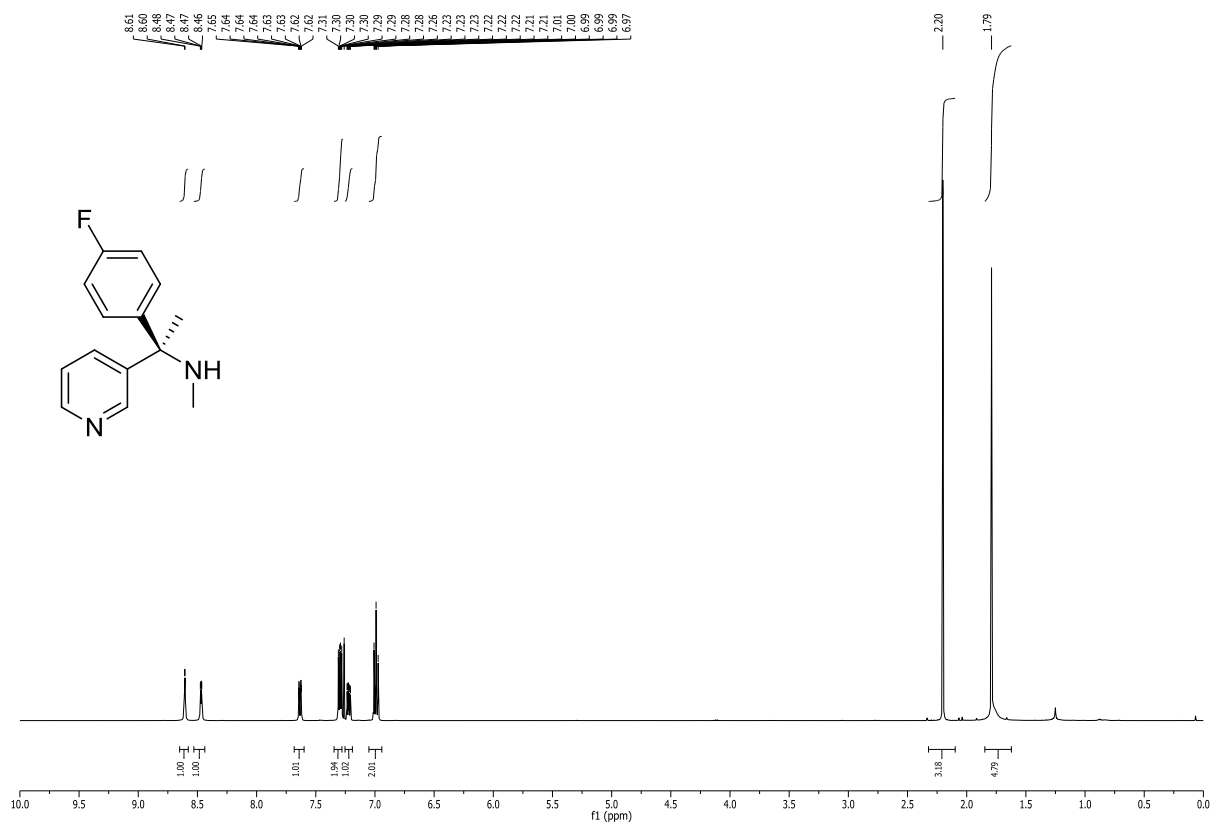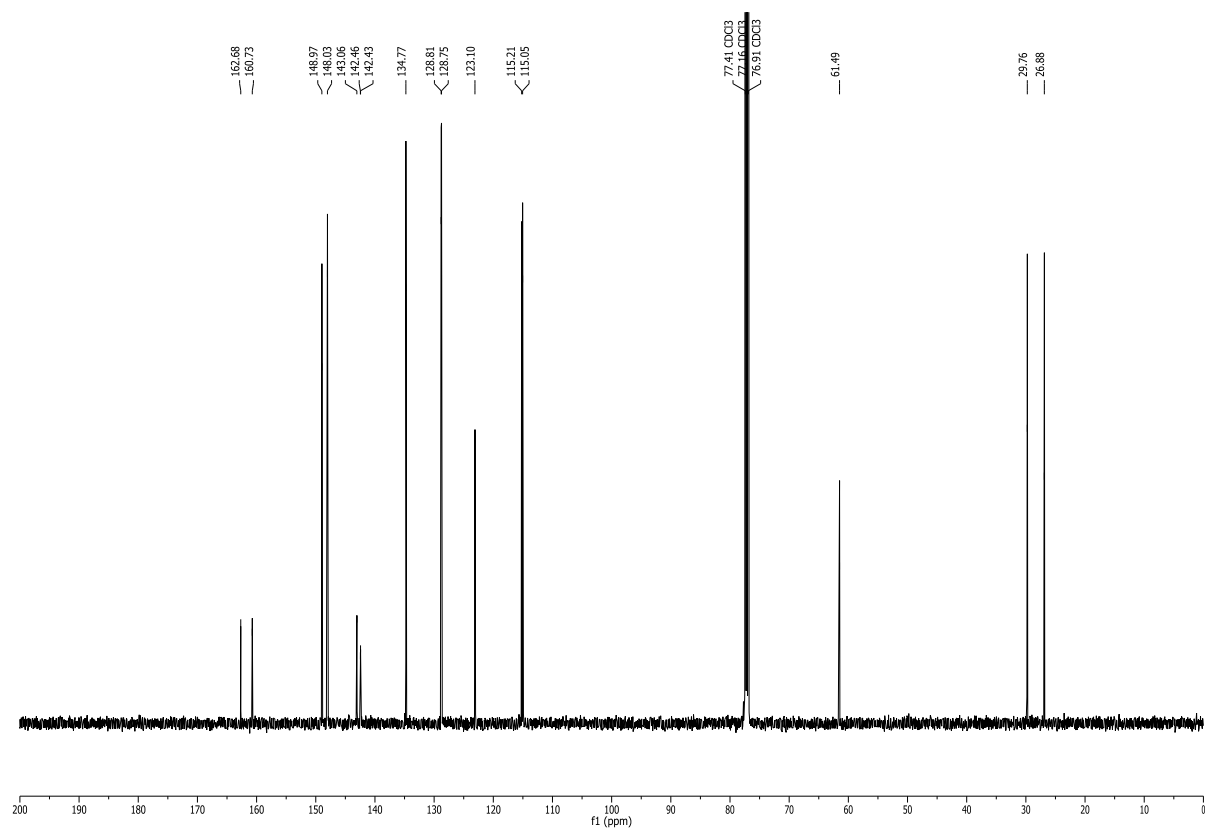



14a

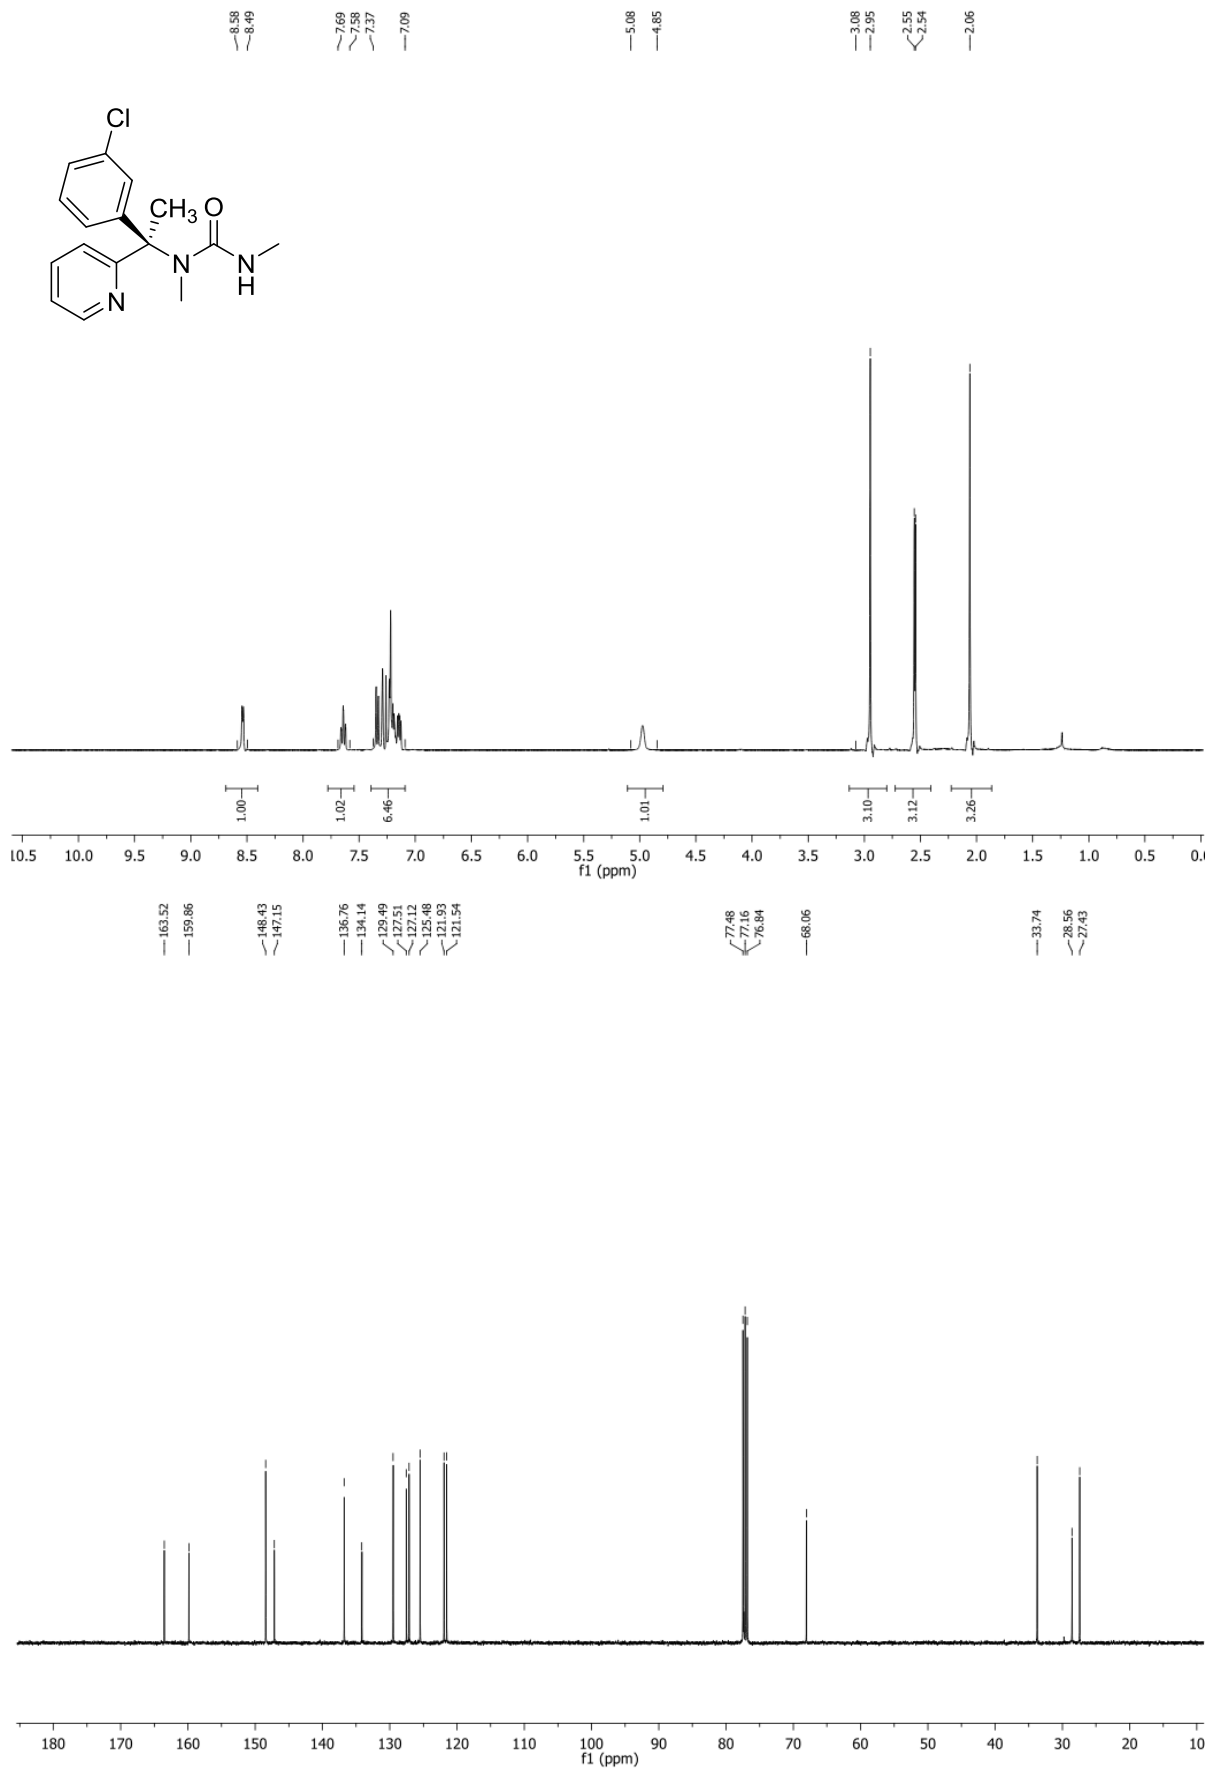

CN(C)C(=O)N[C@@H](Cc1cccnc1)c2ccccc2

**<sup>1</sup>H NMR (400 MHz, DMSO-*d*<sub>6</sub>)**

| Chemical Shift (ppm)                                                                                                                                                                                                                                                                                                                                                                                                                                                                                                                                                                                                                                                                                                                                                                     | Integration      |
|------------------------------------------------------------------------------------------------------------------------------------------------------------------------------------------------------------------------------------------------------------------------------------------------------------------------------------------------------------------------------------------------------------------------------------------------------------------------------------------------------------------------------------------------------------------------------------------------------------------------------------------------------------------------------------------------------------------------------------------------------------------------------------------|------------------|
| 8.431, 8.408                                                                                                                                                                                                                                                                                                                                                                                                                                                                                                                                                                                                                                                                                                                                                                             | 1.00             |
| 7.393, 7.381, 7.375, 7.373, 7.367, 7.366, 7.365, 7.356, 7.346, 7.306, 7.290, 7.289, 7.285                                                                                                                                                                                                                                                                                                                                                                                                                                                                                                                                                                                                                                                                                                | 0.95, 0.95, 1.00 |
| 5.71, 5.58                                                                                                                                                                                                                                                                                                                                                                                                                                                                                                                                                                                                                                                                                                                                                                               | 1.04             |
| 3.11, 3.09                                                                                                                                                                                                                                                                                                                                                                                                                                                                                                                                                                                                                                                                                                                                                                               | 2.71             |
| 2.53, 2.51, 2.49, 2.47, 2.45, 2.43, 2.41, 2.39, 2.37, 2.35, 2.33, 2.31, 2.29, 2.27, 2.25, 2.23, 2.21, 2.19, 2.17, 2.15, 2.13, 2.11, 2.09, 2.07, 2.05, 2.03, 2.01, 1.99, 1.97, 1.95, 1.93, 1.91, 1.89, 1.87, 1.85, 1.83, 1.81, 1.79, 1.77, 1.75, 1.73, 1.71, 1.69, 1.67, 1.65, 1.63, 1.61, 1.59, 1.57, 1.55, 1.53, 1.51, 1.49, 1.47, 1.45, 1.43, 1.41, 1.39, 1.37, 1.35, 1.33, 1.31, 1.29, 1.27, 1.25, 1.23, 1.21, 1.19, 1.17, 1.15, 1.13, 1.11, 1.09, 1.07, 1.05, 1.03, 1.01, 0.99, 0.97, 0.95, 0.93, 0.91, 0.89, 0.87, 0.85, 0.83, 0.81, 0.79, 0.77, 0.75, 0.73, 0.71, 0.69, 0.67, 0.65, 0.63, 0.61, 0.59, 0.57, 0.55, 0.53, 0.51, 0.49, 0.47, 0.45, 0.43, 0.41, 0.39, 0.37, 0.35, 0.33, 0.31, 0.29, 0.27, 0.25, 0.23, 0.21, 0.19, 0.17, 0.15, 0.13, 0.11, 0.09, 0.07, 0.05, 0.03, 0.01 | 1.73, 2.62       |
| 0.86, 0.84, 0.82, 0.80, 0.78, 0.76, 0.74, 0.72, 0.70, 0.68, 0.66, 0.64, 0.62, 0.60, 0.58, 0.56, 0.54, 0.52, 0.50, 0.48, 0.46, 0.44, 0.42, 0.40, 0.38, 0.36, 0.34, 0.32, 0.30, 0.28, 0.26, 0.24, 0.22, 0.20, 0.18, 0.16, 0.14, 0.12, 0.10, 0.08, 0.06, 0.04, 0.02, 0.00                                                                                                                                                                                                                                                                                                                                                                                                                                                                                                                   | 2.77             |

**<sup>13</sup>C NMR (100 MHz, DMSO-*d*<sub>6</sub>)**

| Chemical Shift (ppm)                                                                                                           |
|--------------------------------------------------------------------------------------------------------------------------------|
| 162.60, 160.33, 148.30, 142.75, 136.58, 128.26, 127.70, 126.77, 121.97, 77.48, 77.16, 76.84, 70.86, 33.50, 33.09, 27.25, 10.06 |

**14c**

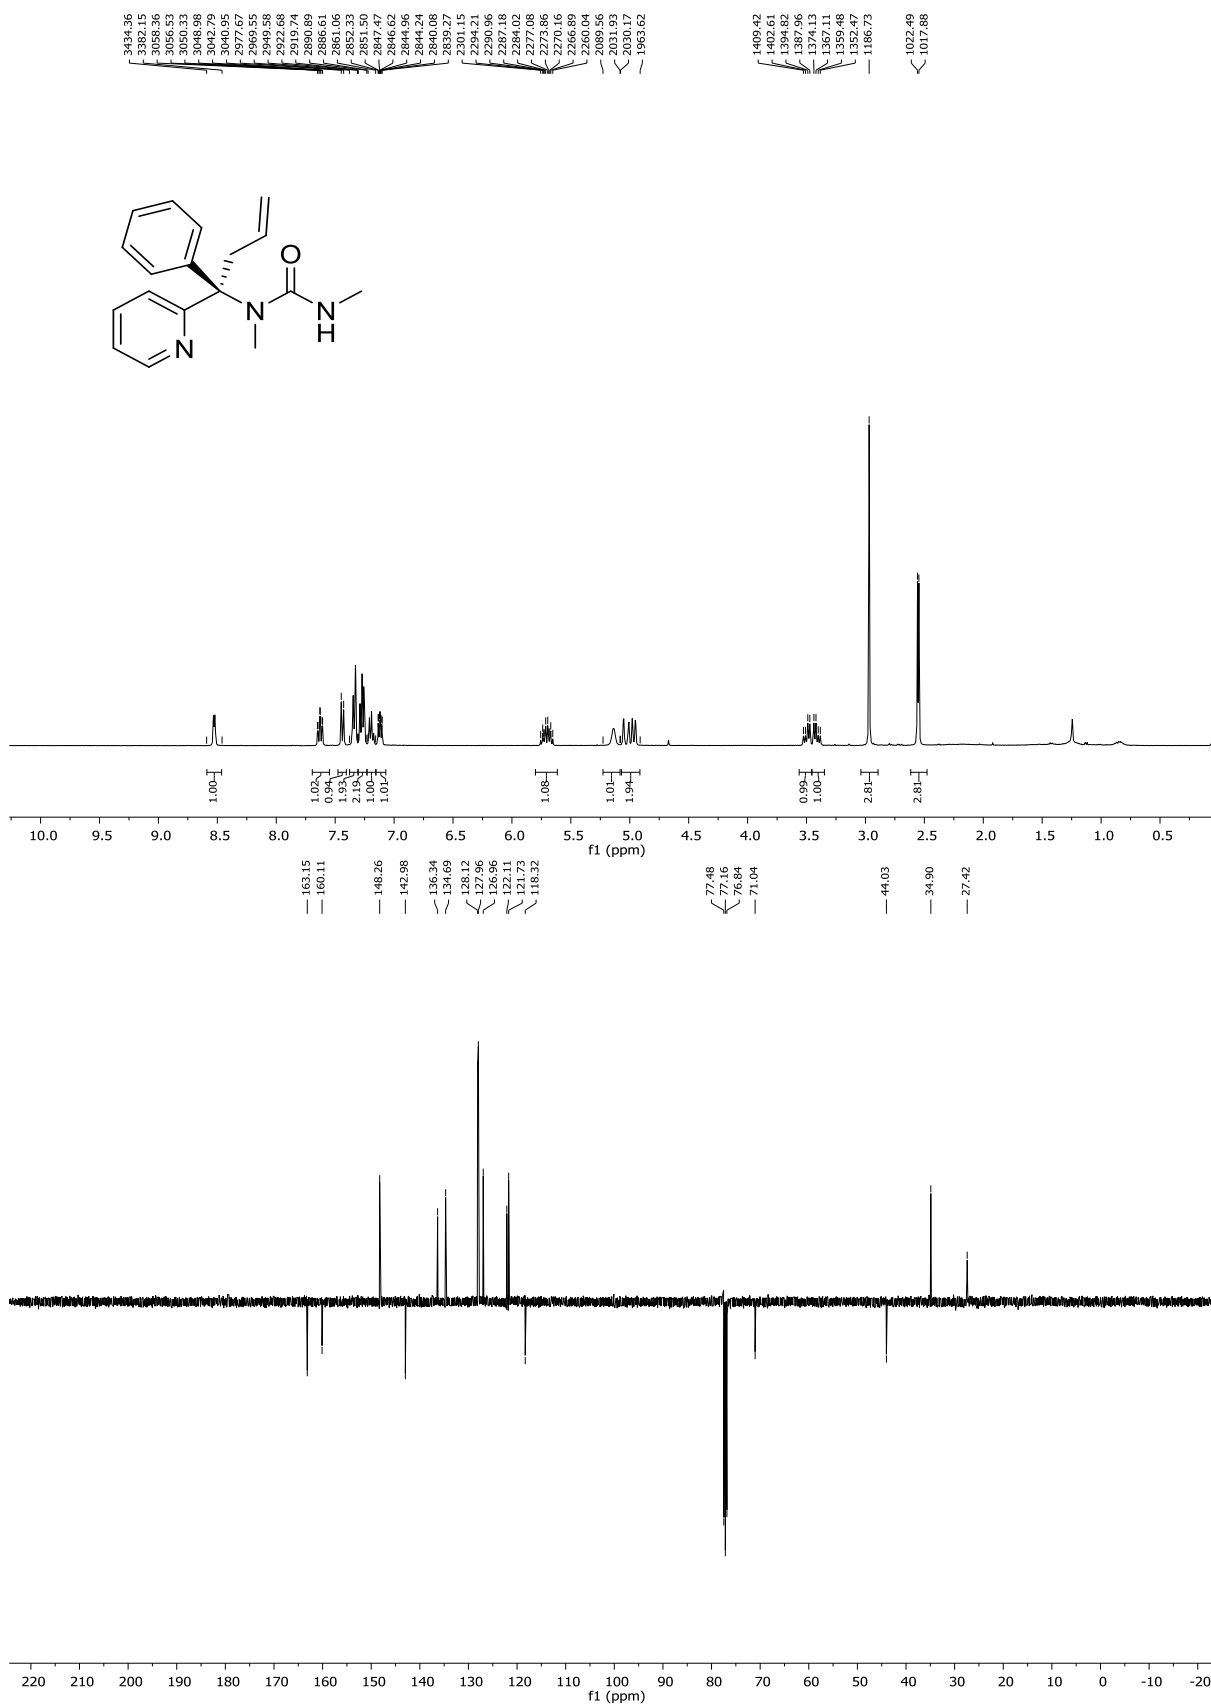

15a

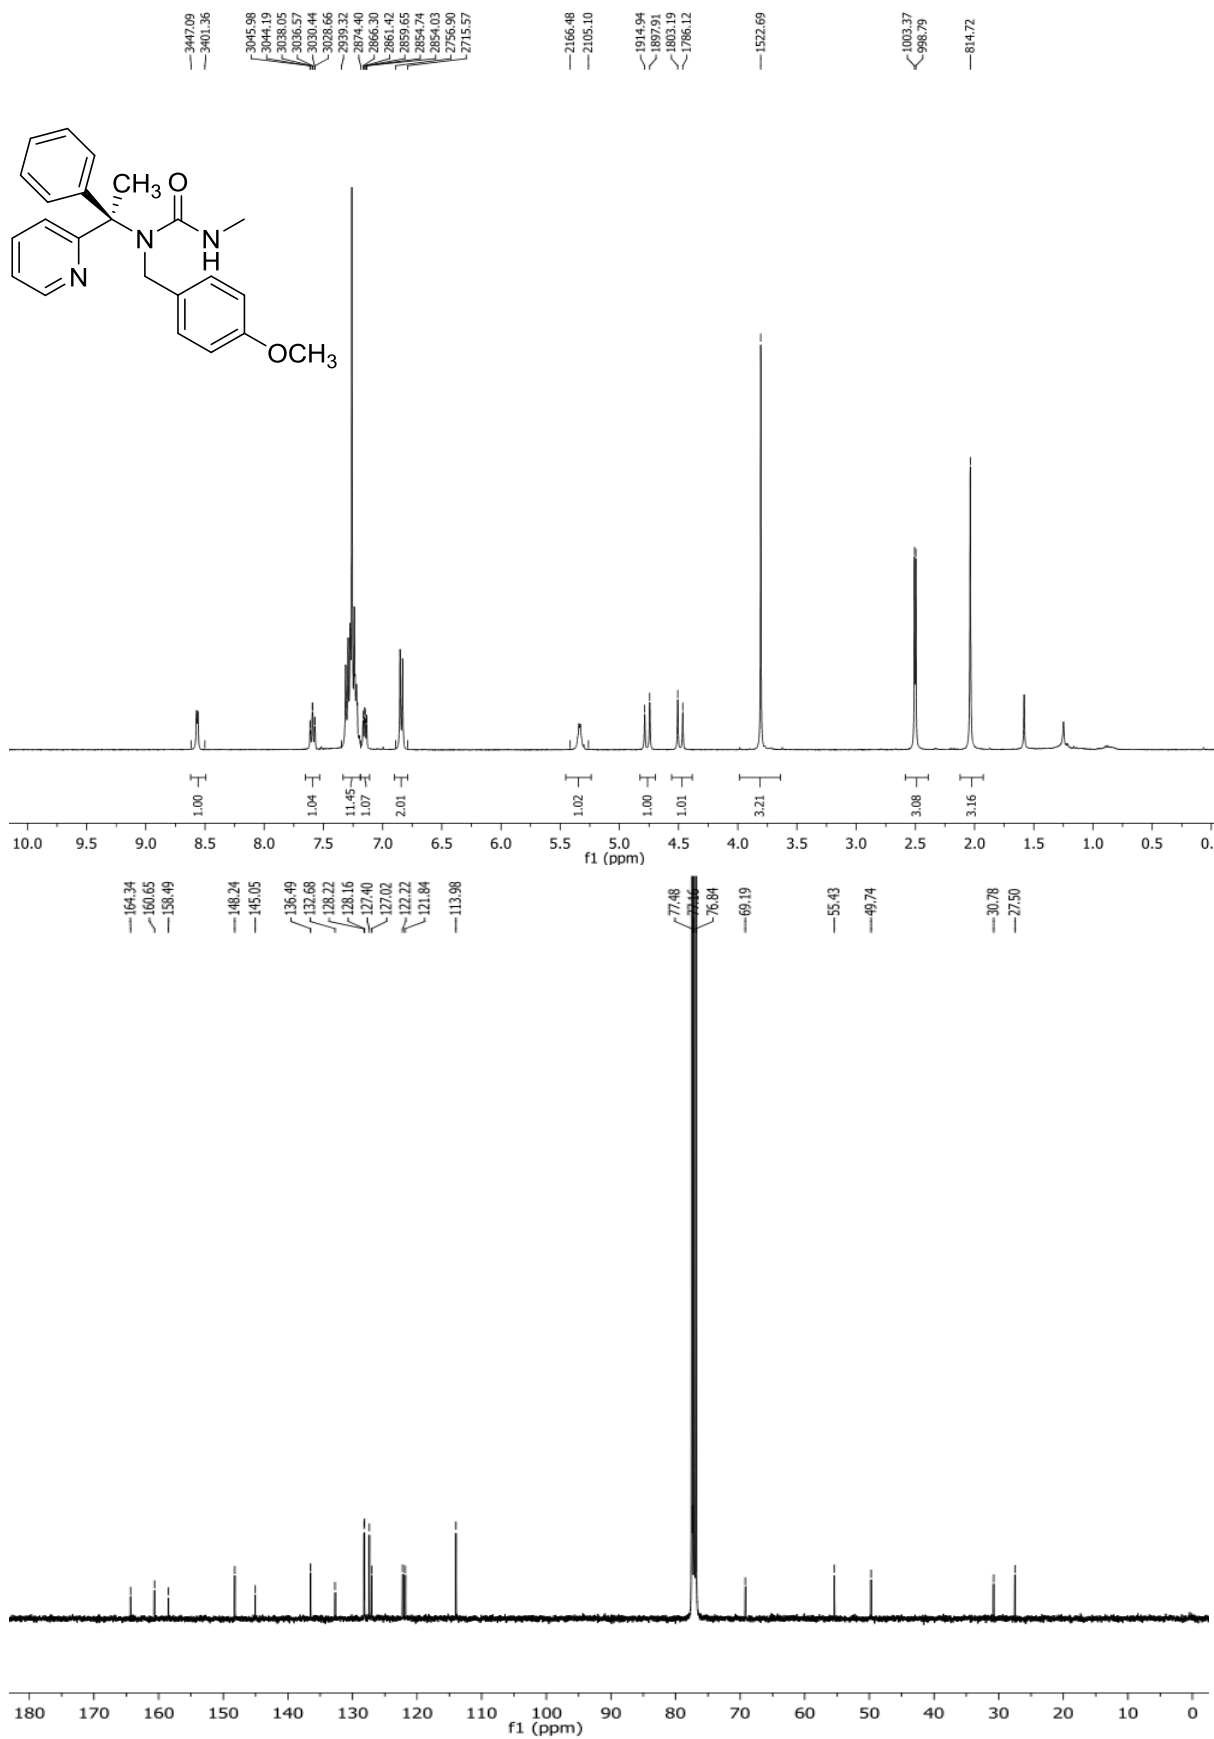

Chemical structure of compound 10: COc1ccc(cc1)CN2C(=O)N(C)[C@H](c3ccc(C)cc3)c4cccnc42

<sup>1</sup>H NMR (400 MHz, CDCl<sub>3</sub>) spectrum (top):

- Chemical shift (ppm): 8.425, 8.424, 8.423, 8.422, 8.420, 8.419, 8.418, 8.417, 8.416, 8.415, 8.414, 8.413, 8.412, 8.411, 8.410, 8.409, 8.408, 8.407, 8.406, 8.405, 8.404, 8.403, 8.402, 8.401, 8.400, 8.399, 8.398, 8.397, 8.396, 8.395, 8.394, 8.393, 8.392, 8.391, 8.390, 8.389, 8.388, 8.387, 8.386, 8.385, 8.384, 8.383, 8.382, 8.381, 8.380, 8.379, 8.378, 8.377, 8.376, 8.375, 8.374, 8.373, 8.372, 8.371, 8.370, 8.369, 8.368, 8.367, 8.366, 8.365, 8.364, 8.363, 8.362, 8.361, 8.360, 8.359, 8.358, 8.357, 8.356, 8.355, 8.354, 8.353, 8.352, 8.351, 8.350, 8.349, 8.348, 8.347, 8.346, 8.345, 8.344, 8.343, 8.342, 8.341, 8.340, 8.339, 8.338, 8.337, 8.336, 8.335, 8.334, 8.333, 8.332, 8.331, 8.330, 8.329, 8.328, 8.327, 8.326, 8.325, 8.324, 8.323, 8.322, 8.321, 8.320, 8.319, 8.318, 8.317, 8.316, 8.315, 8.314, 8.313, 8.312, 8.311, 8.310, 8.309, 8.308, 8.307, 8.306, 8.305, 8.304, 8.303, 8.302, 8.301, 8.300, 8.299, 8.298, 8.297, 8.296, 8.295, 8.294, 8.293, 8.292, 8.291, 8.290, 8.289, 8.288, 8.287, 8.286, 8.285, 8.284, 8.283, 8.282, 8.281, 8.280, 8.279, 8.278, 8.277, 8.276, 8.275, 8.274, 8.273, 8.272, 8.271, 8.270, 8.269, 8.268, 8.267, 8.266, 8.265, 8.264, 8.263, 8.262, 8.261, 8.260, 8.259, 8.258, 8.257, 8.256, 8.255, 8.254, 8.253, 8.252, 8.251, 8.250, 8.249, 8.248, 8.247, 8.246, 8.245, 8.244, 8.243, 8.242, 8.241, 8.240, 8.239, 8.238, 8.237, 8.236, 8.235, 8.234, 8.233, 8.232, 8.231, 8.230, 8.229, 8.228, 8.227, 8.226, 8.225, 8.224, 8.223, 8.222, 8.221, 8.220, 8.219, 8.218, 8.217, 8.216, 8.215, 8.214, 8.213, 8.212, 8.211, 8.210, 8.209, 8.208, 8.207, 8.206, 8.205, 8.204, 8.203, 8.202, 8.201, 8.200, 8.199, 8.198, 8.197, 8.196, 8.195, 8.194, 8.193, 8.192, 8.191, 8.190, 8.189, 8.188, 8.187, 8.186, 8.185, 8.184, 8.183, 8.182, 8.181, 8.180, 8.179, 8.178, 8.177, 8.176, 8.175, 8.174, 8.173, 8.172, 8.171, 8.170, 8.169, 8.168, 8.167, 8.166, 8.165, 8.164, 8.163, 8.162, 8.161, 8.160, 8.159, 8.158, 8.157, 8.156, 8.155, 8.154, 8.153, 8.152, 8.151, 8.150, 8.149, 8.148, 8.147, 8.146, 8.145, 8.144, 8.143, 8.142, 8.141, 8.140, 8.139, 8.138, 8.137, 8.136, 8.135, 8.134, 8.133, 8.132, 8.131, 8.130, 8.129, 8.128, 8.127, 8.126, 8.125, 8.124, 8.123, 8.122, 8.121, 8.120, 8.119, 8.118, 8.117, 8.116, 8.115, 8.114, 8.113, 8.112, 8.111, 8.110, 8.109, 8.108, 8.107, 8.106, 8.105, 8.104, 8.103, 8.102, 8.101, 8.100, 8.099, 8.098, 8.097, 8.096, 8.095, 8.094, 8.093, 8.092, 8.091, 8.090, 8.089, 8.088, 8.087, 8.086, 8.085, 8.084, 8.083, 8.082, 8.081, 8.080, 8.079, 8.078, 8.077, 8.076, 8.075, 8.074, 8.073, 8.072, 8.071, 8.070, 8.069, 8.068, 8.067, 8.066, 8.065, 8.064, 8.063, 8.062, 8.061, 8.060, 8.059, 8.058, 8.057, 8.056, 8.055, 8.054, 8.053, 8.052, 8.051, 8.050, 8.049, 8.048, 8.047, 8.046, 8.045, 8.044, 8.043, 8.042, 8.041, 8.040, 8.039, 8.038, 8.037, 8.036, 8.035, 8.034, 8.033, 8.032, 8.031, 8.030, 8.029, 8.028, 8.027, 8.026, 8.025, 8.024, 8.023, 8.022, 8.021, 8.020, 8.019, 8.018, 8.017, 8.016, 8.015, 8.014, 8.013, 8.012, 8.011, 8.010, 8.009, 8.008, 8.007, 8.006, 8.005, 8.004, 8.003, 8.002, 8.001, 8.000, 7.999, 7.998, 7.997, 7.996, 7.995, 7.994, 7.993, 7.992, 7.991, 7.990, 7.989, 7.988, 7.987, 7.986, 7.985, 7.984, 7.983, 7.982, 7.981, 7.980, 7.979, 7.978, 7.977, 7.976, 7.975, 7.974, 7.973, 7.972, 7.971, 7.970, 7.969, 7.968, 7.967, 7.966, 7.965, 7.964, 7.963, 7.962, 7.961, 7.960, 7.959, 7.958, 7.957, 7.956, 7.955, 7.954, 7.953, 7.952, 7.951, 7.950, 7.949, 7.948, 7.947, 7.946, 7.945, 7.944, 7.943, 7.942, 7.941, 7.940, 7.939, 7.938, 7.937, 7.936, 7.935, 7.934, 7.933, 7.932, 7.931, 7.930, 7.929, 7.928, 7.927, 7.926, 7.925, 7.924, 7.923, 7.922, 7.921, 7.920, 7.919, 7.918, 7.917, 7.916, 7.915, 7.914, 7.913, 7.912, 7.911, 7.910, 7.909, 7.908, 7.907, 7.906, 7.905, 7.904, 7.903, 7.902, 7.901, 7.900, 7.899, 7.898, 7.897, 7.896, 7.895, 7.894, 7.893, 7.892, 7.891, 7.890, 7.889, 7.888, 7.887, 7.886, 7.885, 7.884, 7.883, 7.882, 7.881, 7.880, 7.879, 7.878, 7.877, 7.876, 7.875, 7.874, 7.873, 7.872, 7.871, 7.870, 7.869, 7.86

15c

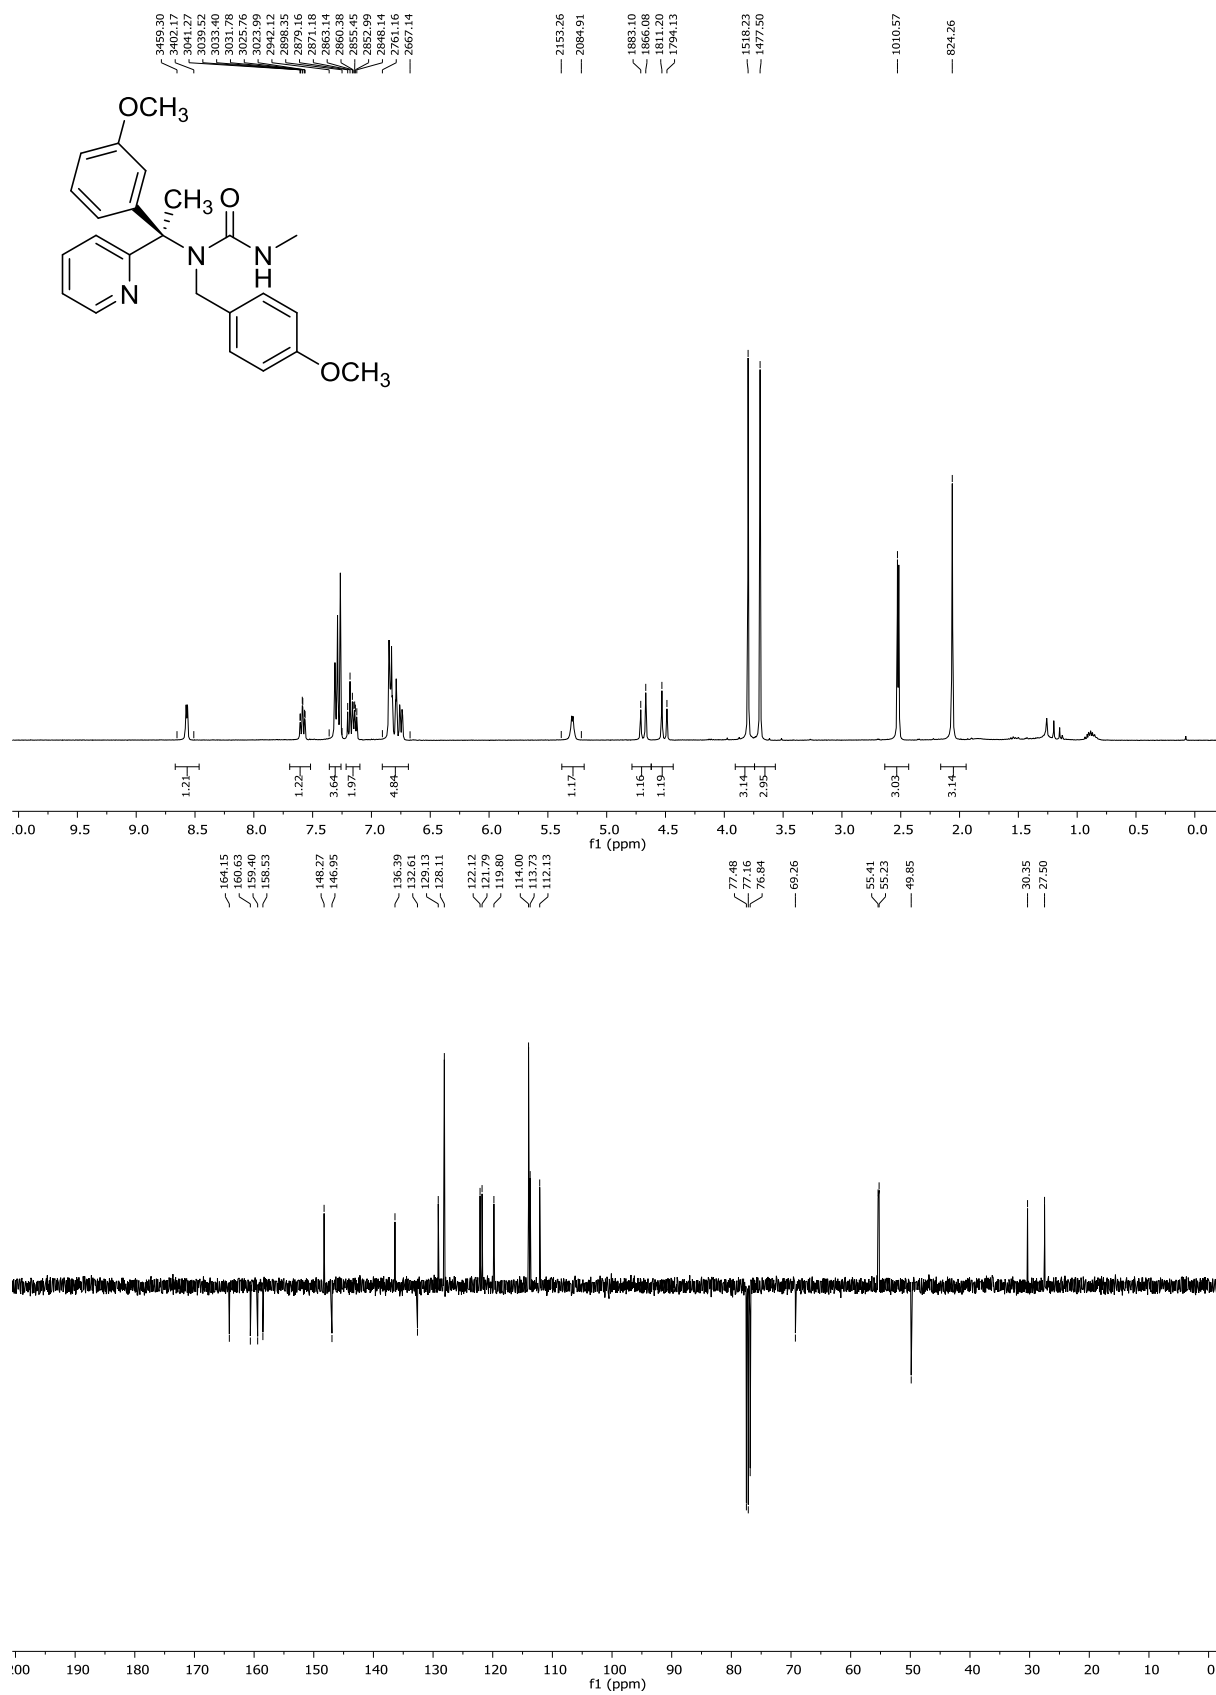

15d

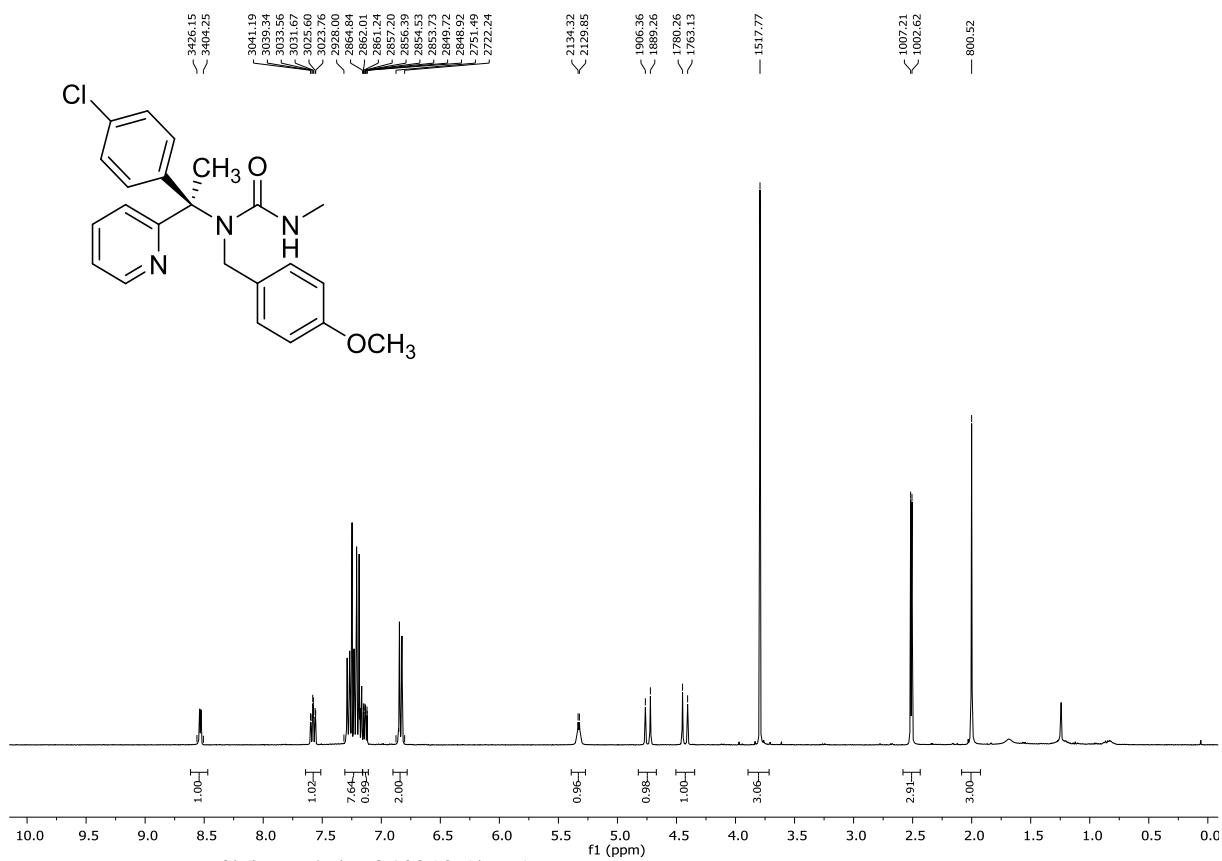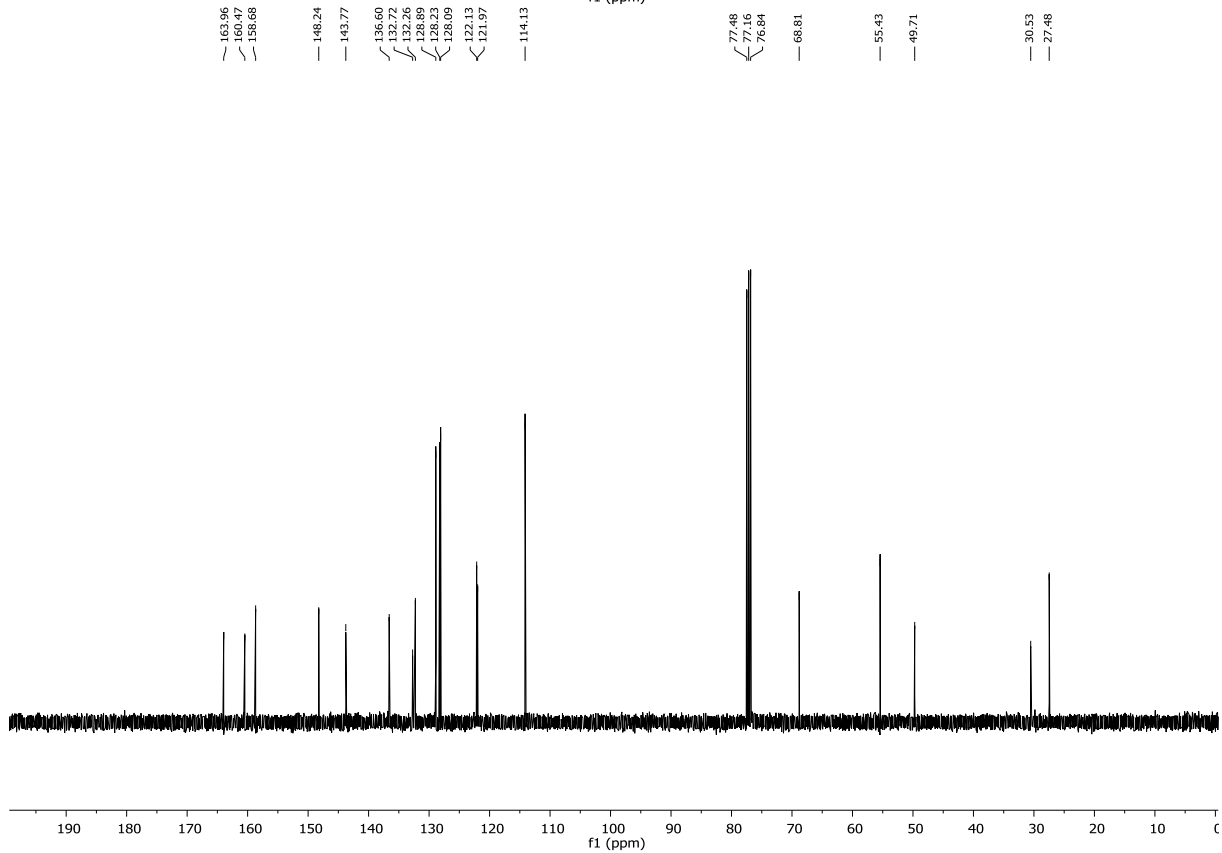

15e

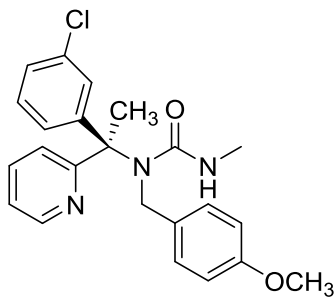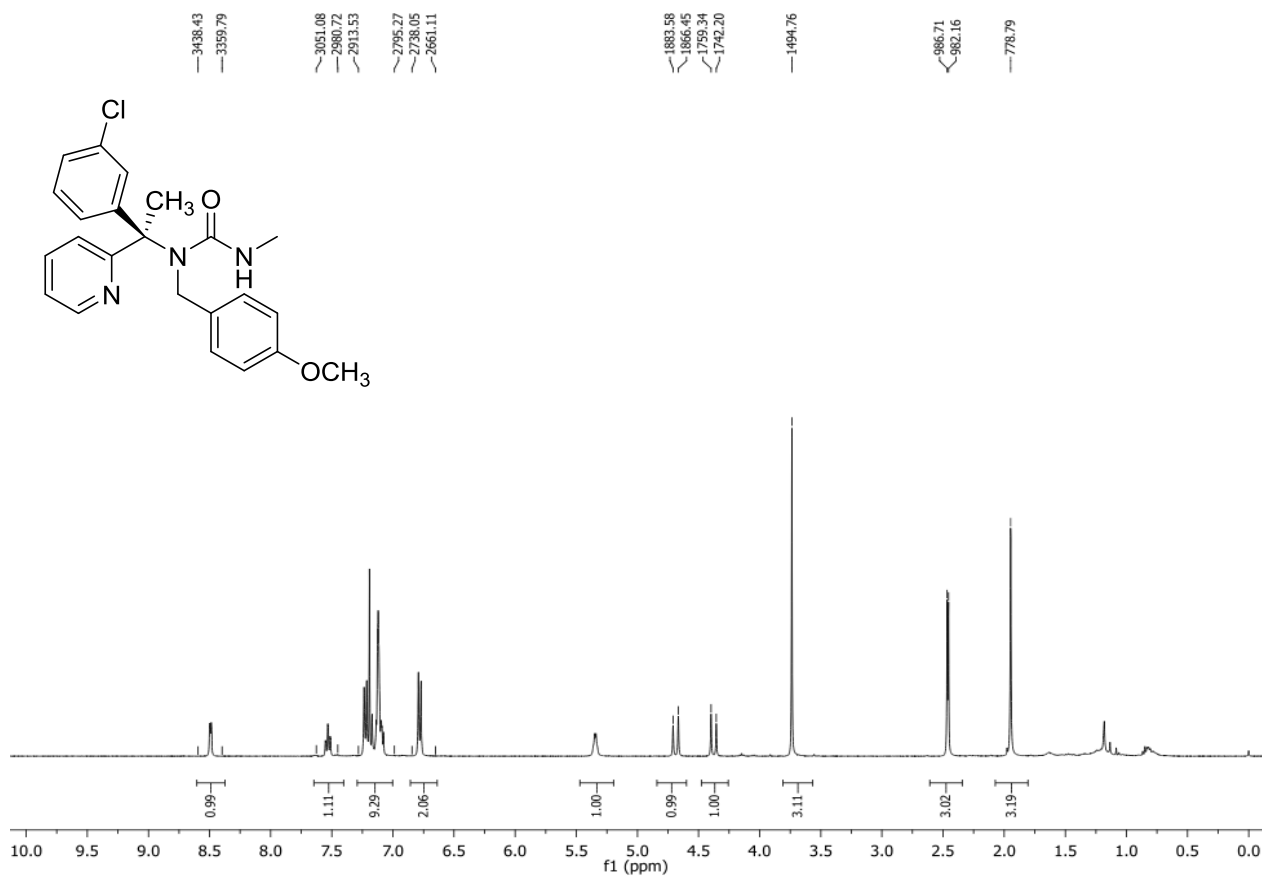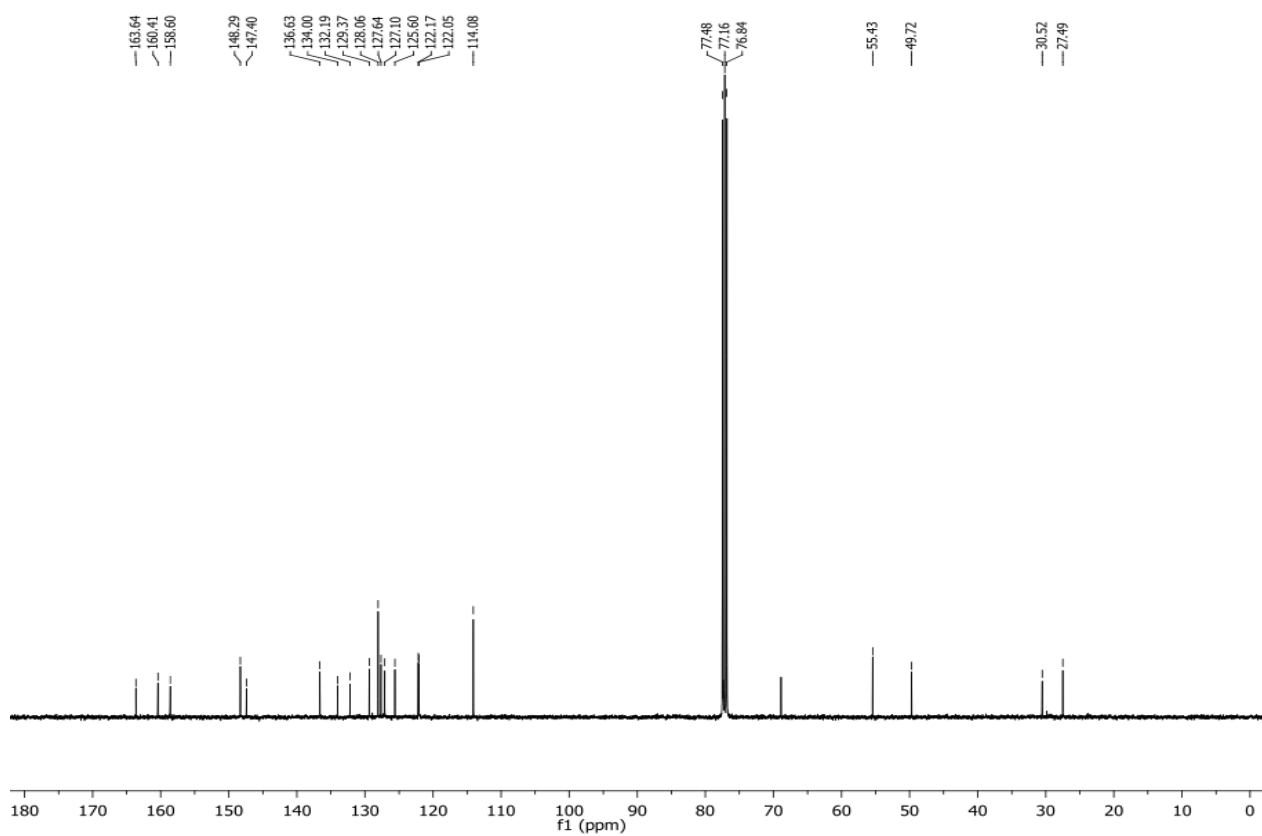

15f

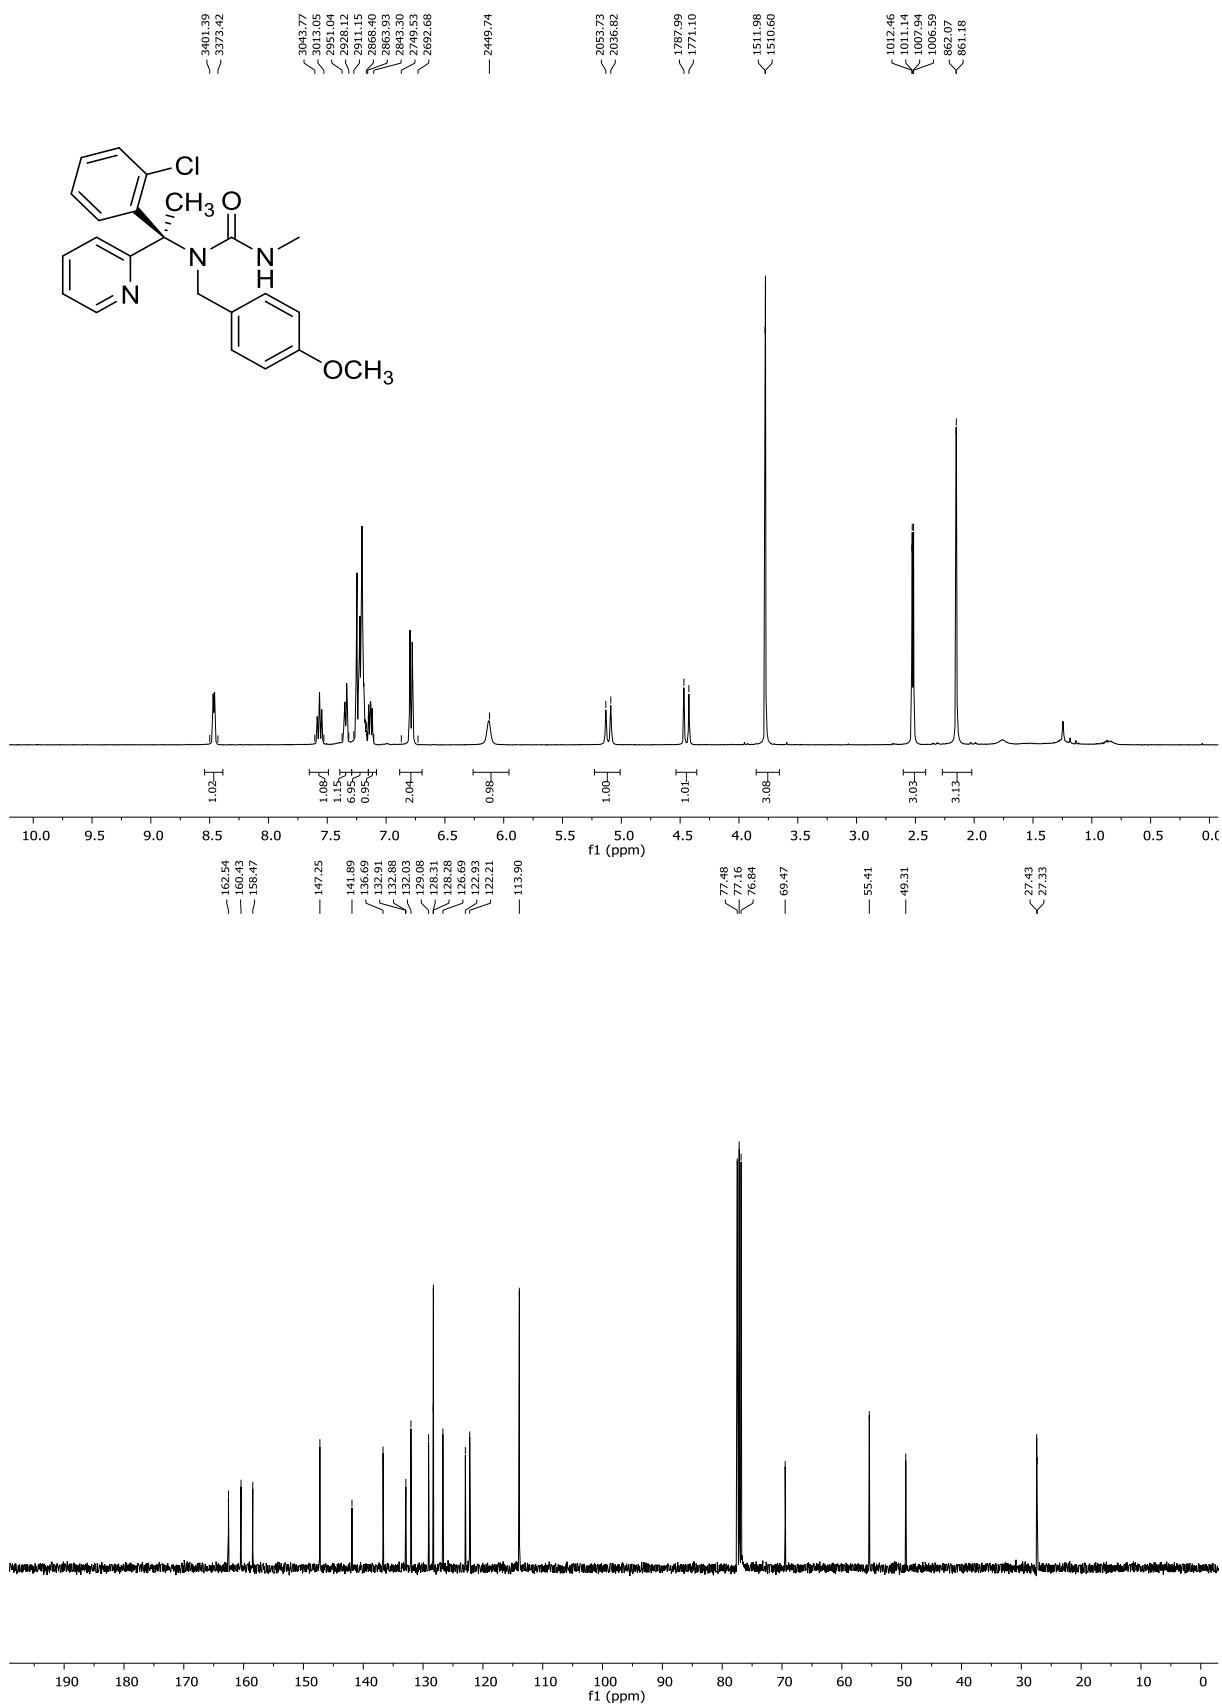

15g

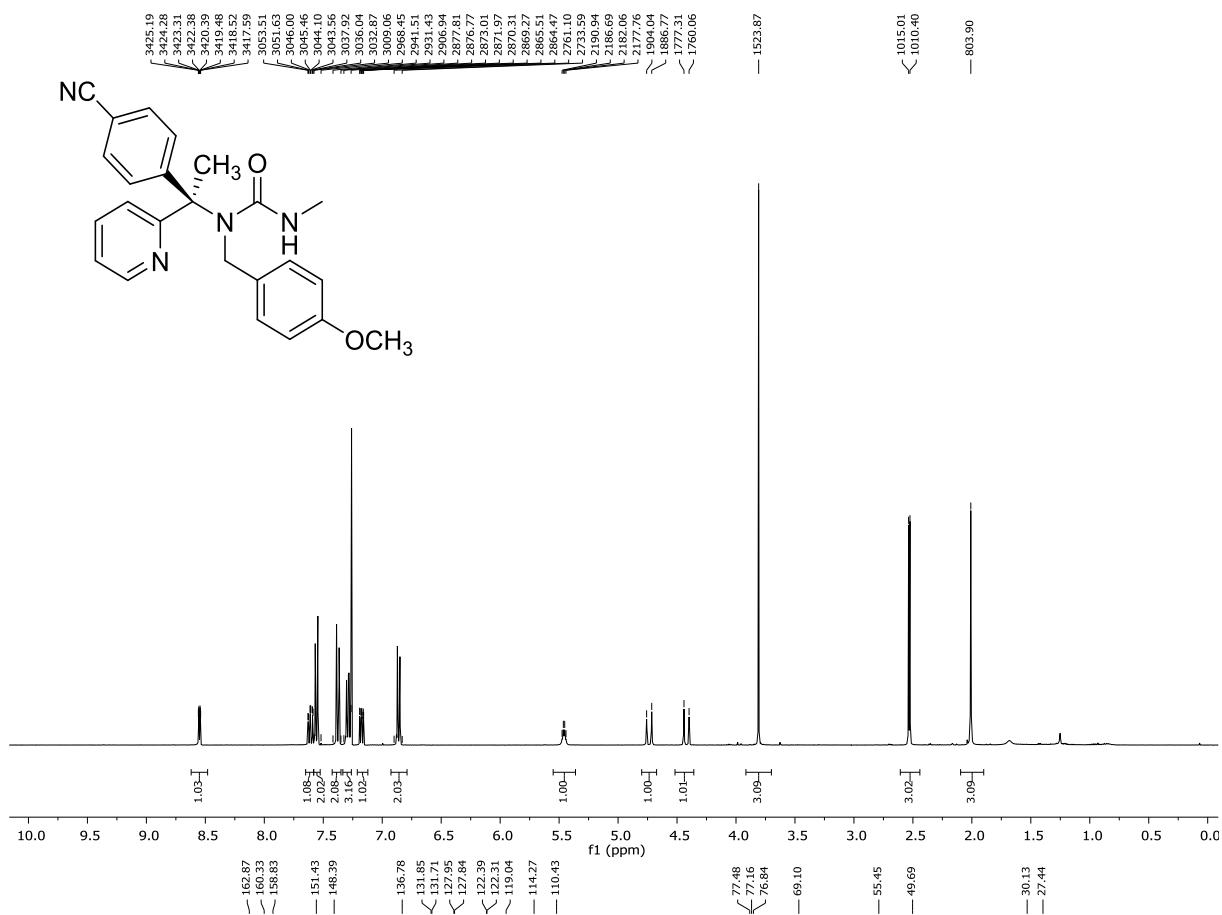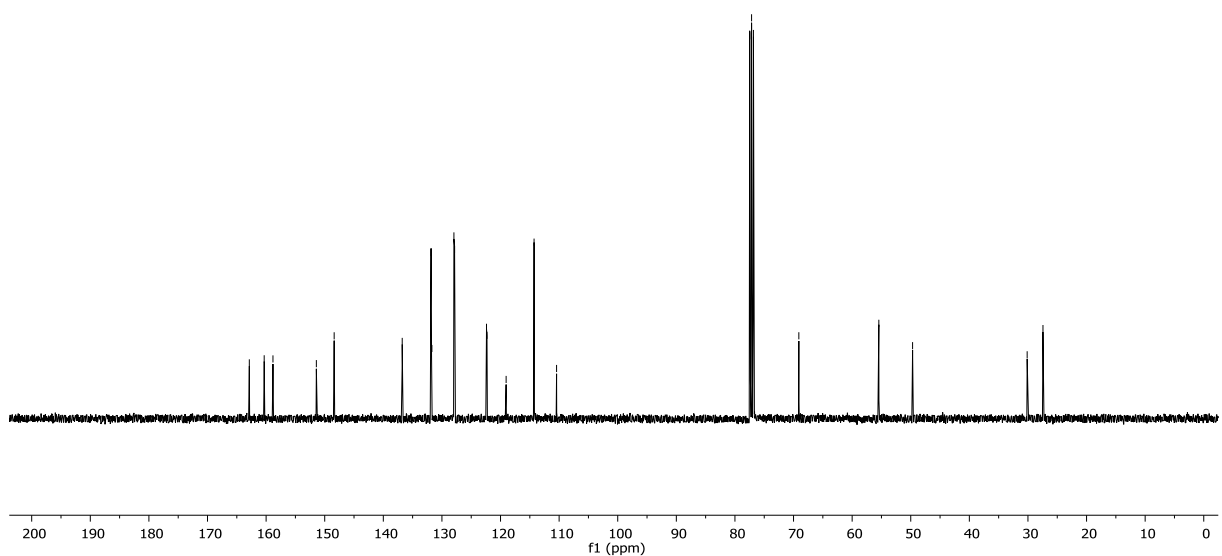

15h

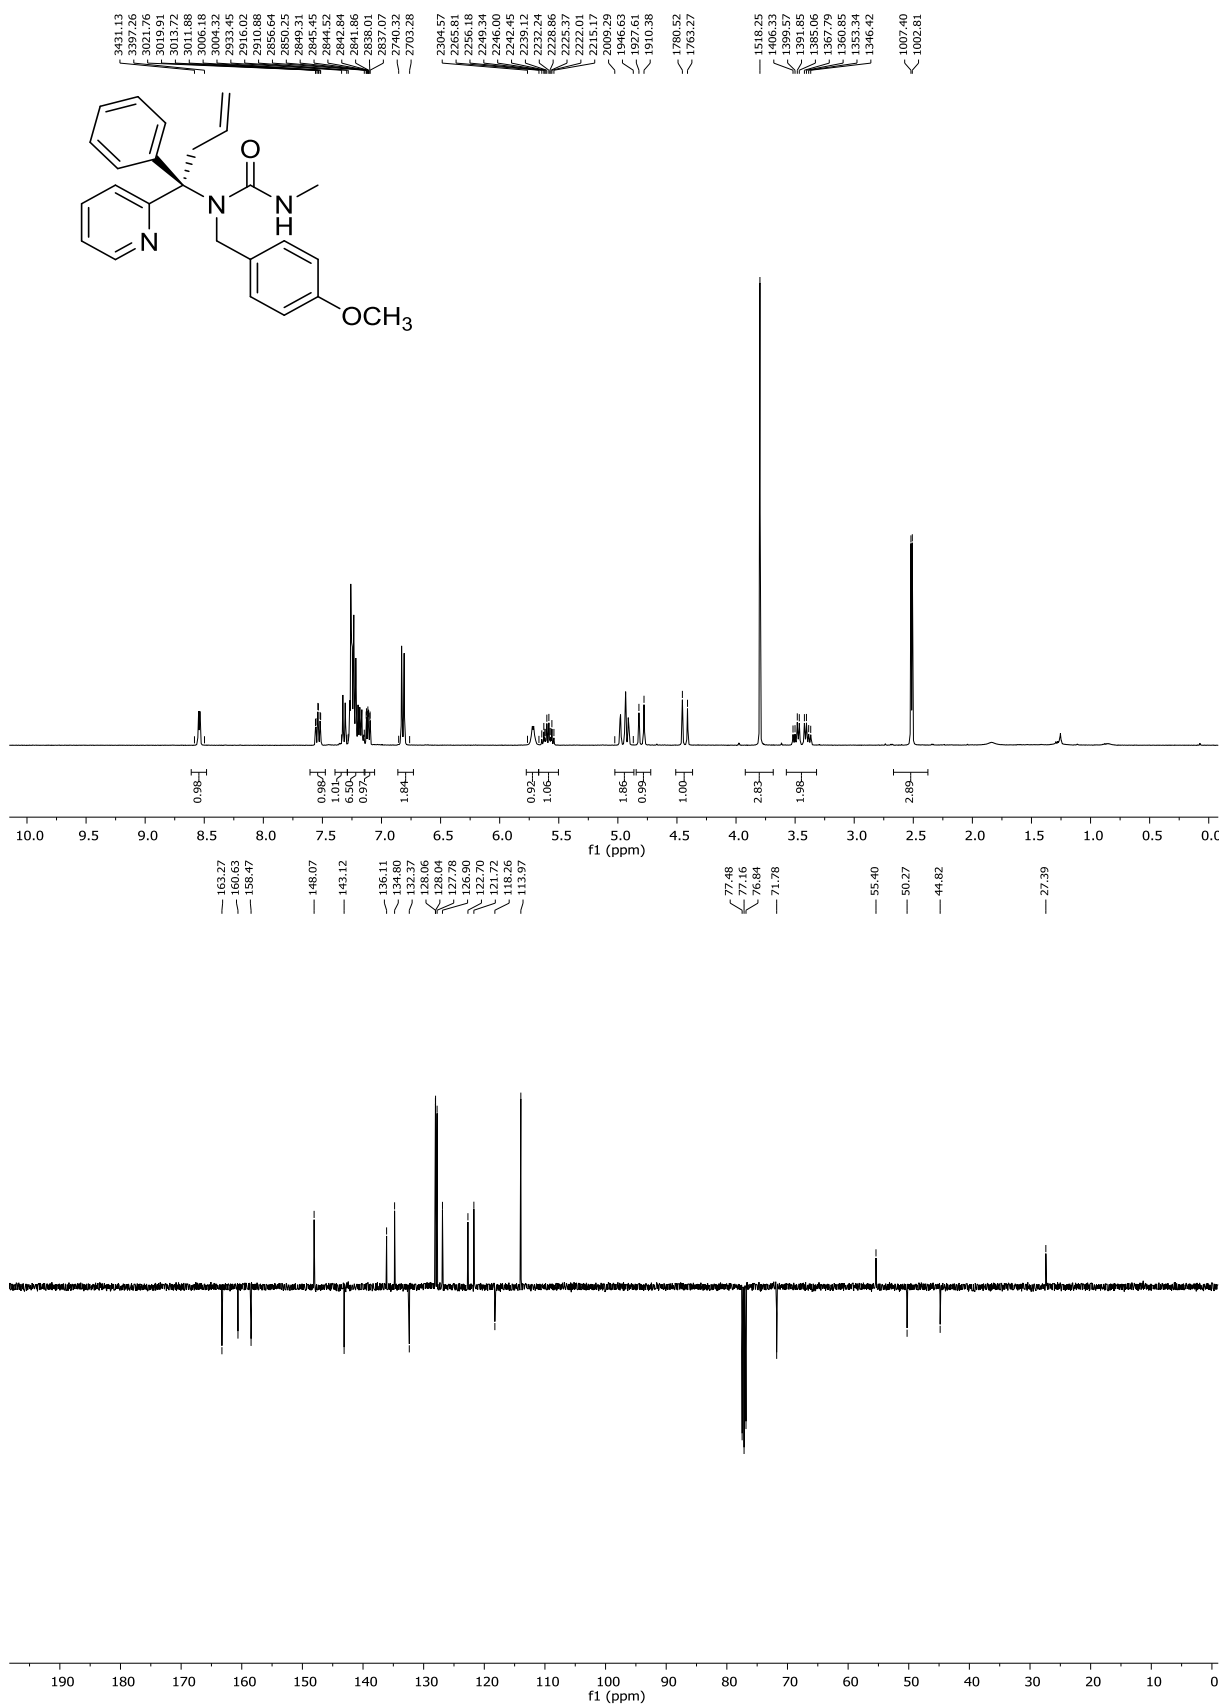

16a

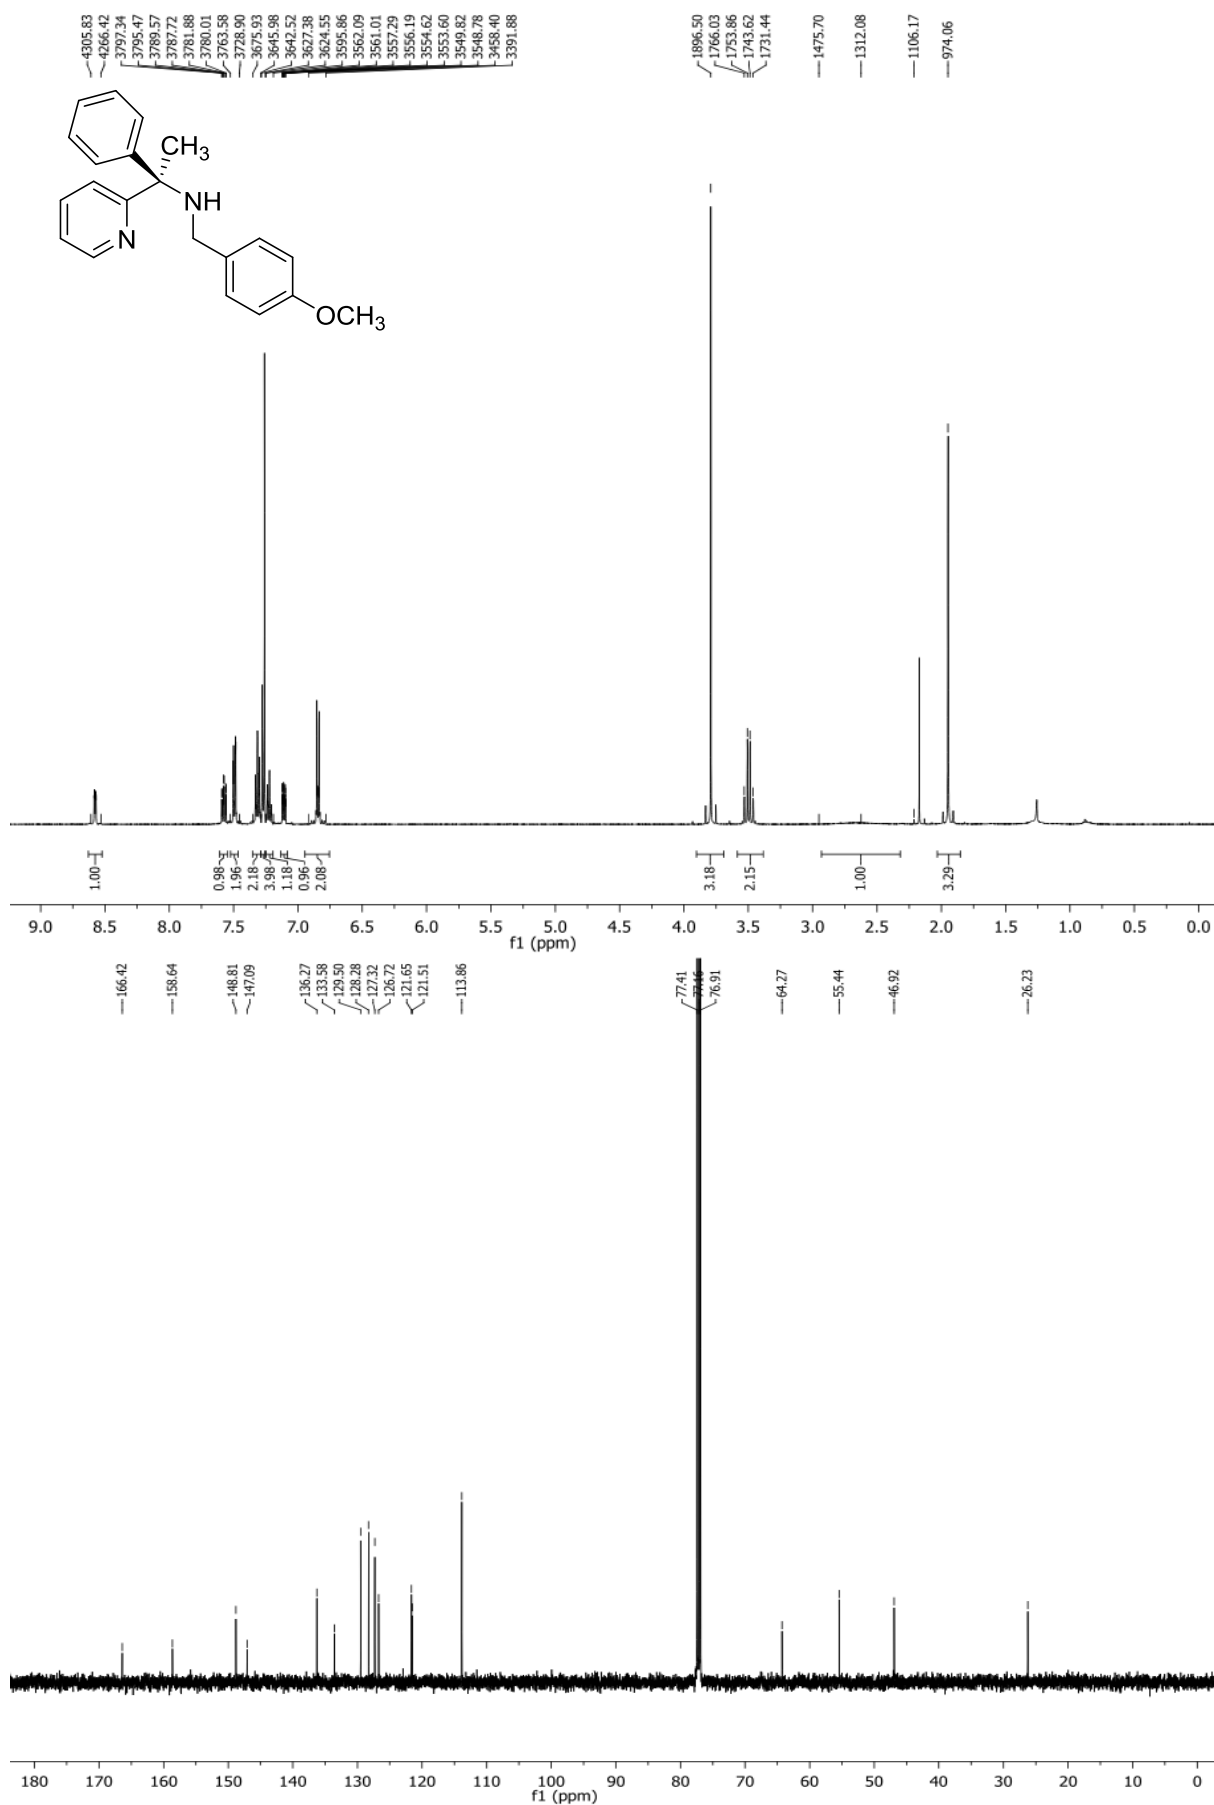

16b

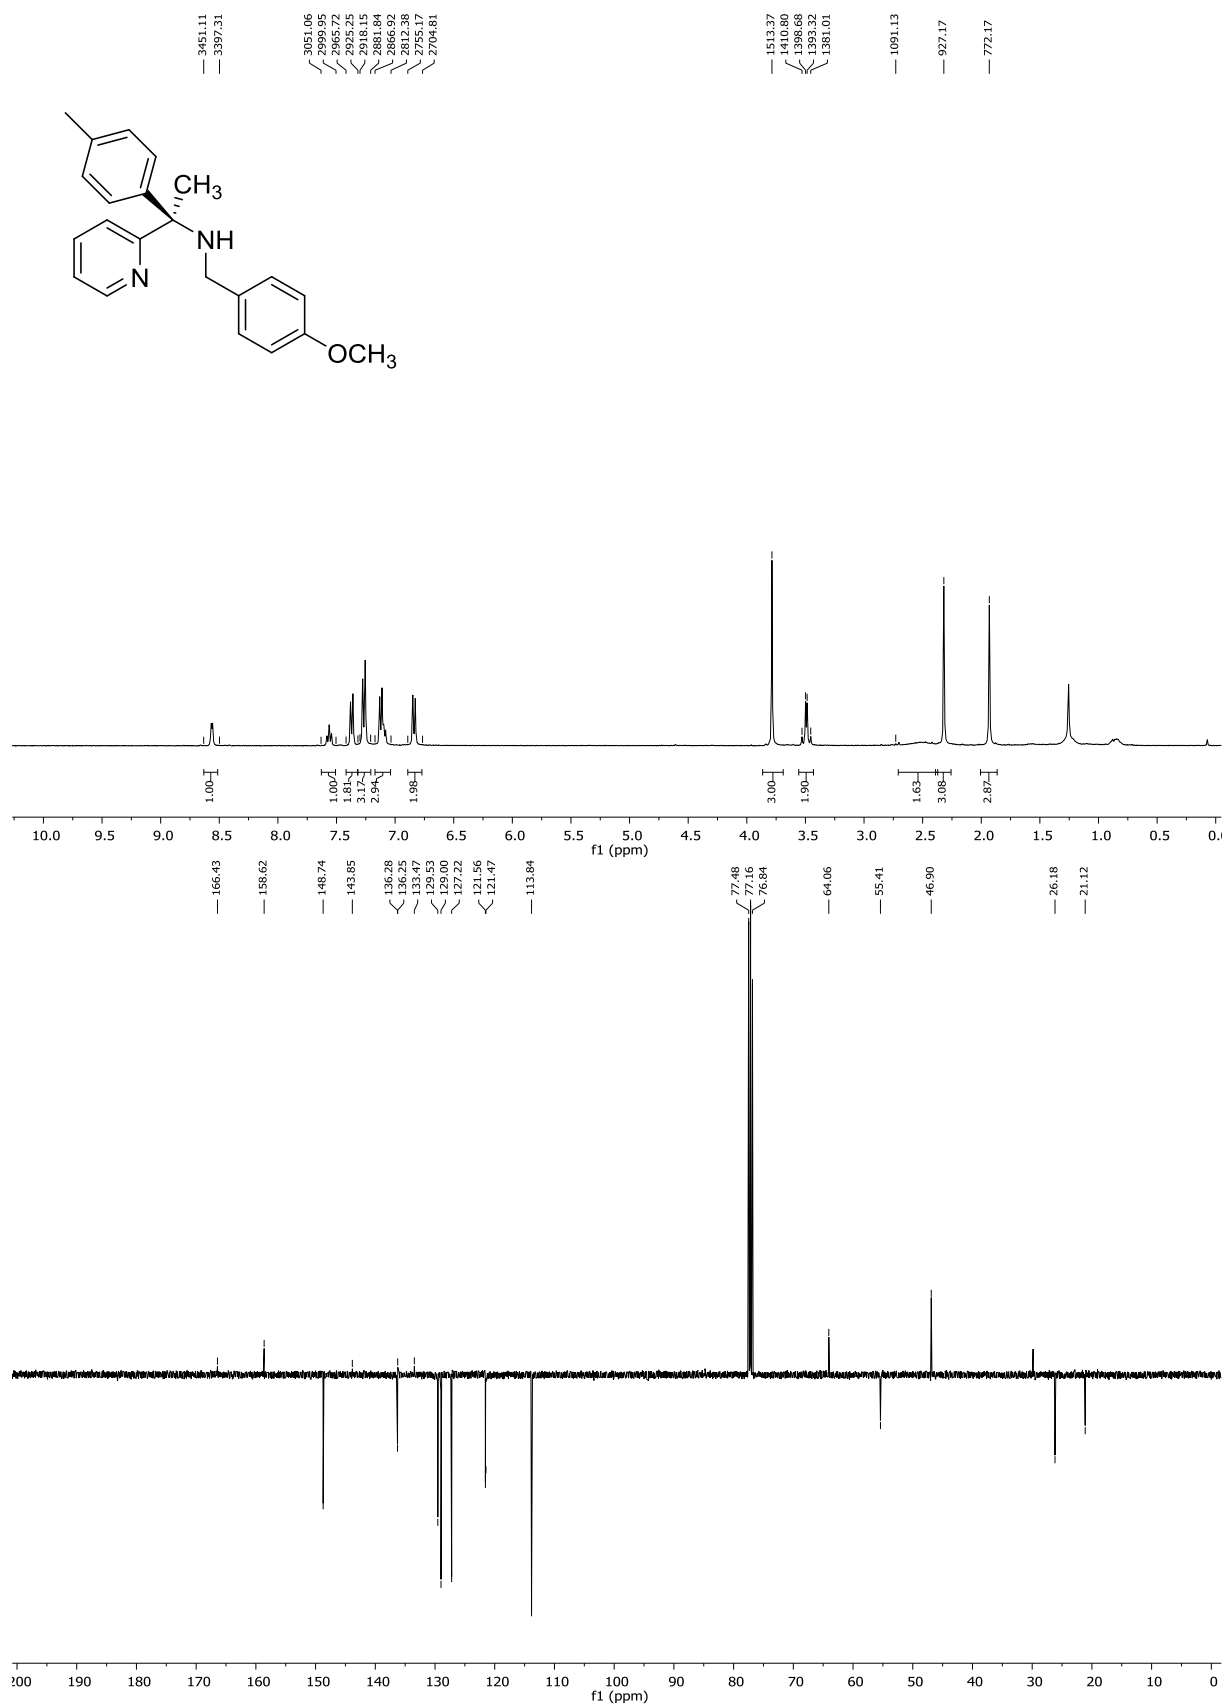

Chemical structure: (S)-1-(4-methoxybenzyl)-2-methyl-3-(4-methoxyphenyl)pyrrolidine

<sup>1</sup>H NMR (400 MHz, CDCl<sub>3</sub>) peaks (ppm): 8.52, 8.51, 7.48, 7.47, 7.28, 7.27, 7.18, 7.17, 7.16, 7.15, 7.14, 7.13, 7.12, 7.11, 7.10, 7.09, 7.08, 7.07, 7.06, 7.05, 7.04, 7.03, 7.02, 7.01, 7.00, 6.99, 6.98, 6.97, 6.96, 6.95, 6.94, 6.93, 6.92, 6.91, 6.90, 6.89, 6.88, 6.87, 6.86, 6.85, 6.84, 6.83, 6.82, 6.81, 6.80, 6.79, 6.78, 6.77, 6.76, 6.75, 6.74, 6.73, 6.72, 6.71, 6.70, 6.69, 6.68, 6.67, 6.66, 6.65, 6.64, 6.63, 6.62, 6.61, 6.60, 6.59, 6.58, 6.57, 6.56, 6.55, 6.54, 6.53, 6.52, 6.51, 6.50, 6.49, 6.48, 6.47, 6.46, 6.45, 6.44, 6.43, 6.42, 6.41, 6.40, 6.39, 6.38, 6.37, 6.36, 6.35, 6.34, 6.33, 6.32, 6.31, 6.30, 6.29, 6.28, 6.27, 6.26, 6.25, 6.24, 6.23, 6.22, 6.21, 6.20, 6.19, 6.18, 6.17, 6.16, 6.15, 6.14, 6.13, 6.12, 6.11, 6.10, 6.09, 6.08, 6.07, 6.06, 6.05, 6.04, 6.03, 6.02, 6.01, 6.00, 5.99, 5.98, 5.97, 5.96, 5.95, 5.94, 5.93, 5.92, 5.91, 5.90, 5.89, 5.88, 5.87, 5.86, 5.85, 5.84, 5.83, 5.82, 5.81, 5.80, 5.79, 5.78, 5.77, 5.76, 5.75, 5.74, 5.73, 5.72, 5.71, 5.70, 5.69, 5.68, 5.67, 5.66, 5.65, 5.64, 5.63, 5.62, 5.61, 5.60, 5.59, 5.58, 5.57, 5.56, 5.55, 5.54, 5.53, 5.52, 5.51, 5.50, 5.49, 5.48, 5.47, 5.46, 5.45, 5.44, 5.43, 5.42, 5.41, 5.40, 5.39, 5.38, 5.37, 5.36, 5.35, 5.34, 5.33, 5.32, 5.31, 5.30, 5.29, 5.28, 5.27, 5.26, 5.25, 5.24, 5.23, 5.22, 5.21, 5.20, 5.19, 5.18, 5.17, 5.16, 5.15, 5.14, 5.13, 5.12, 5.11, 5.10, 5.09, 5.08, 5.07, 5.06, 5.05, 5.04, 5.03, 5.02, 5.01, 5.00, 4.99, 4.98, 4.97, 4.96, 4.95, 4.94, 4.93, 4.92, 4.91, 4.90, 4.89, 4.88, 4.87, 4.86, 4.85, 4.84, 4.83, 4.82, 4.81, 4.80, 4.79, 4.78, 4.77, 4.76, 4.75, 4.74, 4.73, 4.72, 4.71, 4.70, 4.69, 4.68, 4.67, 4.66, 4.65, 4.64, 4.63, 4.62, 4.61, 4.60, 4.59, 4.58, 4.57, 4.56, 4.55, 4.54, 4.53, 4.52, 4.51, 4.50, 4.49, 4.48, 4.47, 4.46, 4.45, 4.44, 4.43, 4.42, 4.41, 4.40, 4.39, 4.38, 4.37, 4.36, 4.35, 4.34, 4.33, 4.32, 4.31, 4.30, 4.29, 4.28, 4.27, 4.26, 4.25, 4.24, 4.23, 4.22, 4.21, 4.20, 4.19, 4.18, 4.17, 4.16, 4.15, 4.14, 4.13, 4.12, 4.11, 4.10, 4.09, 4.08, 4.07, 4.06, 4.05, 4.04, 4.03, 4.02, 4.01, 4.00, 3.99, 3.98, 3.97, 3.96, 3.95, 3.94, 3.93, 3.92, 3.91, 3.90, 3.89, 3.88, 3.87, 3.86, 3.85, 3.84, 3.83, 3.82, 3.81, 3.80, 3.79, 3.78, 3.77, 3.76, 3.75, 3.74, 3.73, 3.72, 3.71, 3.70, 3.69, 3.68, 3.67, 3.66, 3.65, 3.64, 3.63, 3.62, 3.61, 3.60, 3.59, 3.58, 3.57, 3.56, 3.55, 3.54, 3.53, 3.52, 3.51, 3.50, 3.49, 3.48, 3.47, 3.46, 3.45, 3.44, 3.43, 3.42, 3.41, 3.40, 3.39, 3.38, 3.37, 3.36, 3.35, 3.34, 3.33, 3.32, 3.31, 3.30, 3.29, 3.28, 3.27, 3.26, 3.25, 3.24, 3.23, 3.22, 3.21, 3.20, 3.19, 3.18, 3.17, 3.16, 3.15, 3.14, 3.13, 3.12, 3.11, 3.10, 3.09, 3.08, 3.07, 3.06, 3.05, 3.04, 3.03, 3.02, 3.01, 3.00, 2.99, 2.98, 2.97, 2.96, 2.95, 2.94, 2.93, 2.92, 2.91, 2.90, 2.89, 2.88, 2.87, 2.86, 2.85, 2.84, 2.83, 2.82, 2.81, 2.80, 2.79, 2.78, 2.77, 2.76, 2.75, 2.74, 2.73, 2.72, 2.71, 2.70, 2.69, 2.68, 2.67, 2.66, 2.65, 2.64, 2.63, 2.62, 2.61, 2.60, 2.59, 2.58, 2.57, 2.56, 2.55, 2.54, 2.53, 2.52, 2.51, 2.50, 2.49, 2.48, 2.47, 2.46, 2.45, 2.44, 2.43, 2.42, 2.41, 2.40, 2.39, 2.38, 2.37, 2.36, 2.35, 2.34, 2.33, 2.32, 2.31, 2.30, 2.29, 2.28, 2.27, 2.26, 2.25, 2.24, 2.23, 2.22, 2.21, 2.20, 2.19, 2.18, 2.17, 2.16, 2.15, 2.14, 2.13, 2.12, 2.11, 2.10, 2.09, 2.08, 2.07, 2.06, 2.05, 2.04, 2.03, 2.02, 2.01, 2.00, 1.99, 1.98, 1.97, 1.96, 1.95, 1.94, 1.93, 1.92, 1.91, 1.90, 1.89, 1.88, 1.87, 1.86, 1.85, 1.84, 1.83, 1.82, 1.81, 1.80, 1.79, 1.78, 1.77, 1.76, 1.75, 1.74, 1.73, 1.72, 1.71, 1.70, 1.69, 1.68, 1.67, 1.66, 1.65, 1.64, 1.63, 1.62, 1.61, 1.60, 1.59, 1.58, 1.57, 1.56, 1.55, 1.54, 1.53, 1.52, 1.51, 1.50, 1.49, 1.48, 1.47, 1.46, 1.45, 1.44, 1.43, 1.42, 1.41, 1.40, 1.39, 1.38, 1.37, 1.36, 1.35, 1.34, 1.33, 1.32, 1.31, 1.30, 1.29, 1.28, 1.27, 1.26, 1.25, 1.24, 1.23, 1.22, 1.21, 1.20, 1.19, 1.18, 1.17, 1.16, 1.15, 1.14, 1.13, 1.12, 1.11, 1.10, 1.09, 1.08, 1.07, 1.06, 1.05, 1.04, 1.03, 1.02, 1.01, 1.00, 0.99, 0.98, 0.97, 0.96, 0.95, 0.94, 0.93, 0.92, 0.91, 0.90, 0.89, 0.88, 0.87, 0.86, 0.85, 0.84, 0.83, 0.82, 0.81, 0.80, 0.79, 0.78, 0.77, 0.76, 0.75, 0.74, 0.73, 0.72, 0

16d

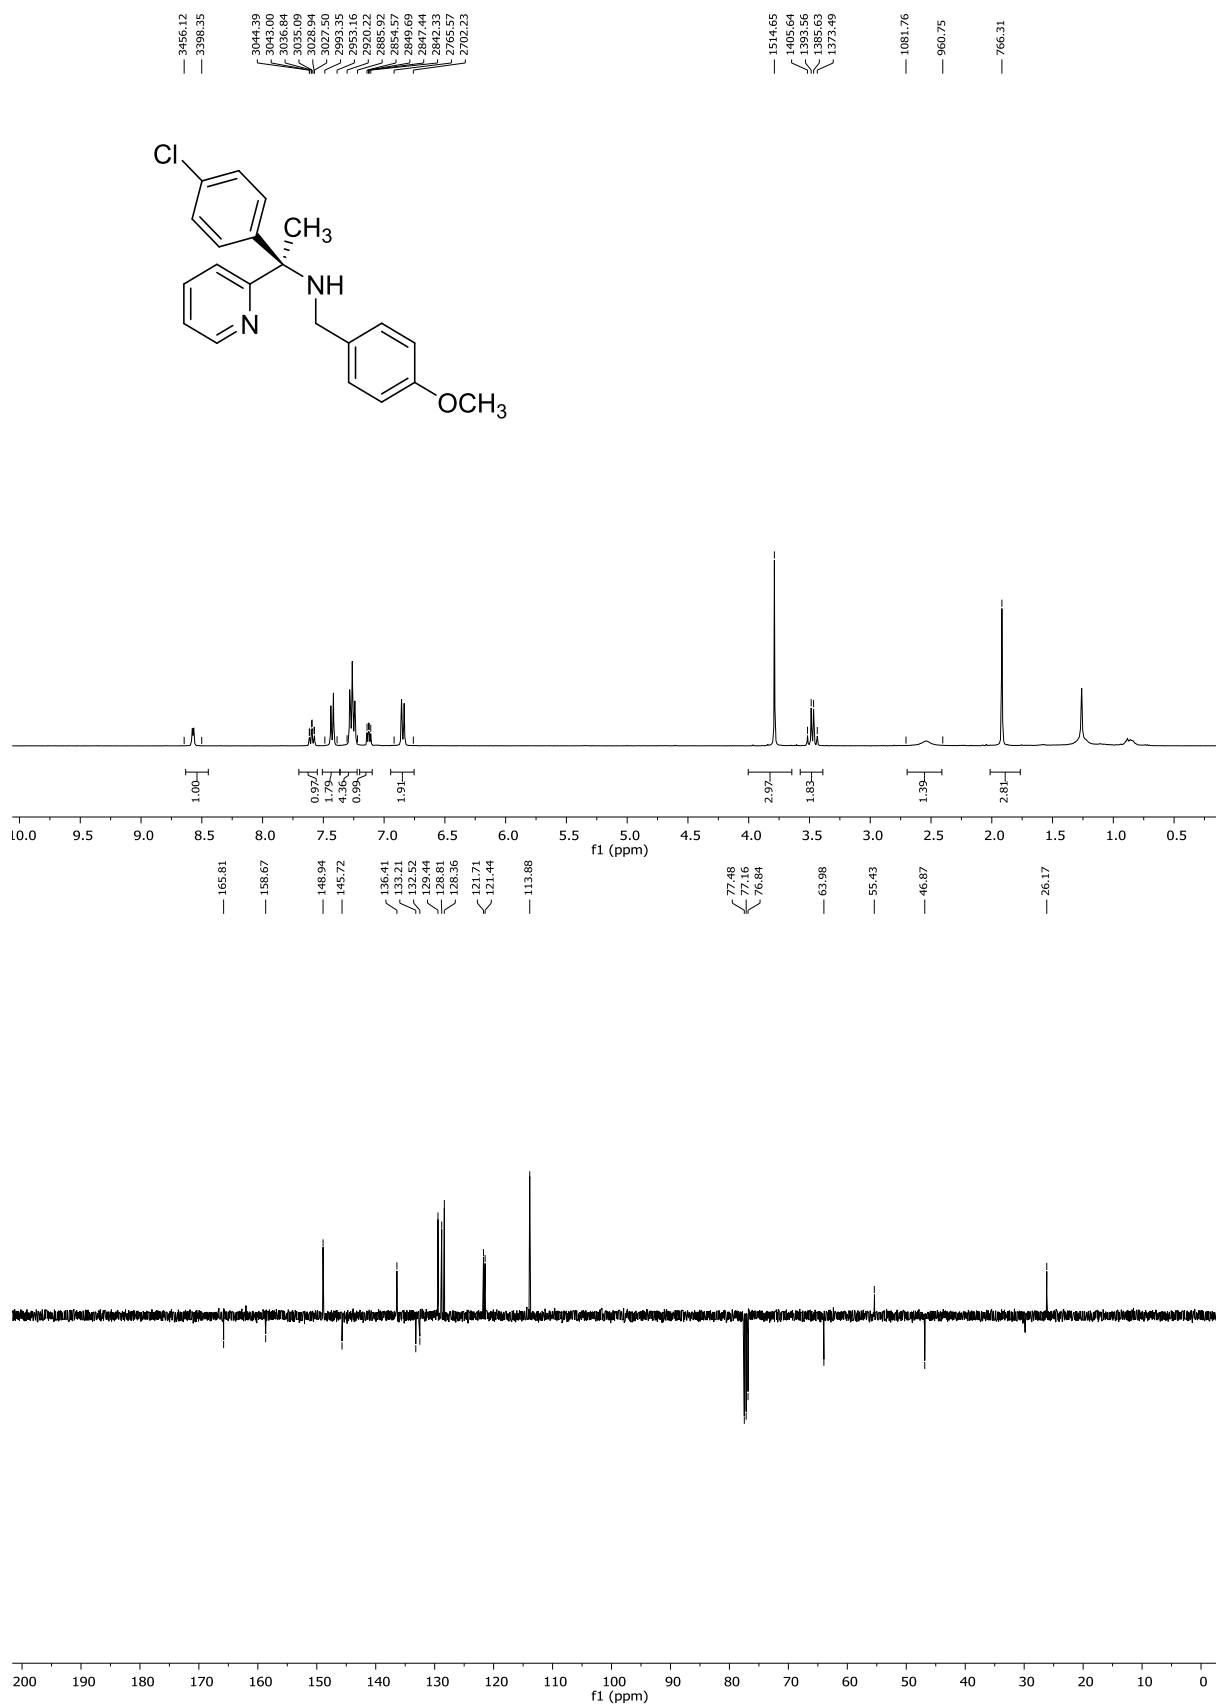

16e

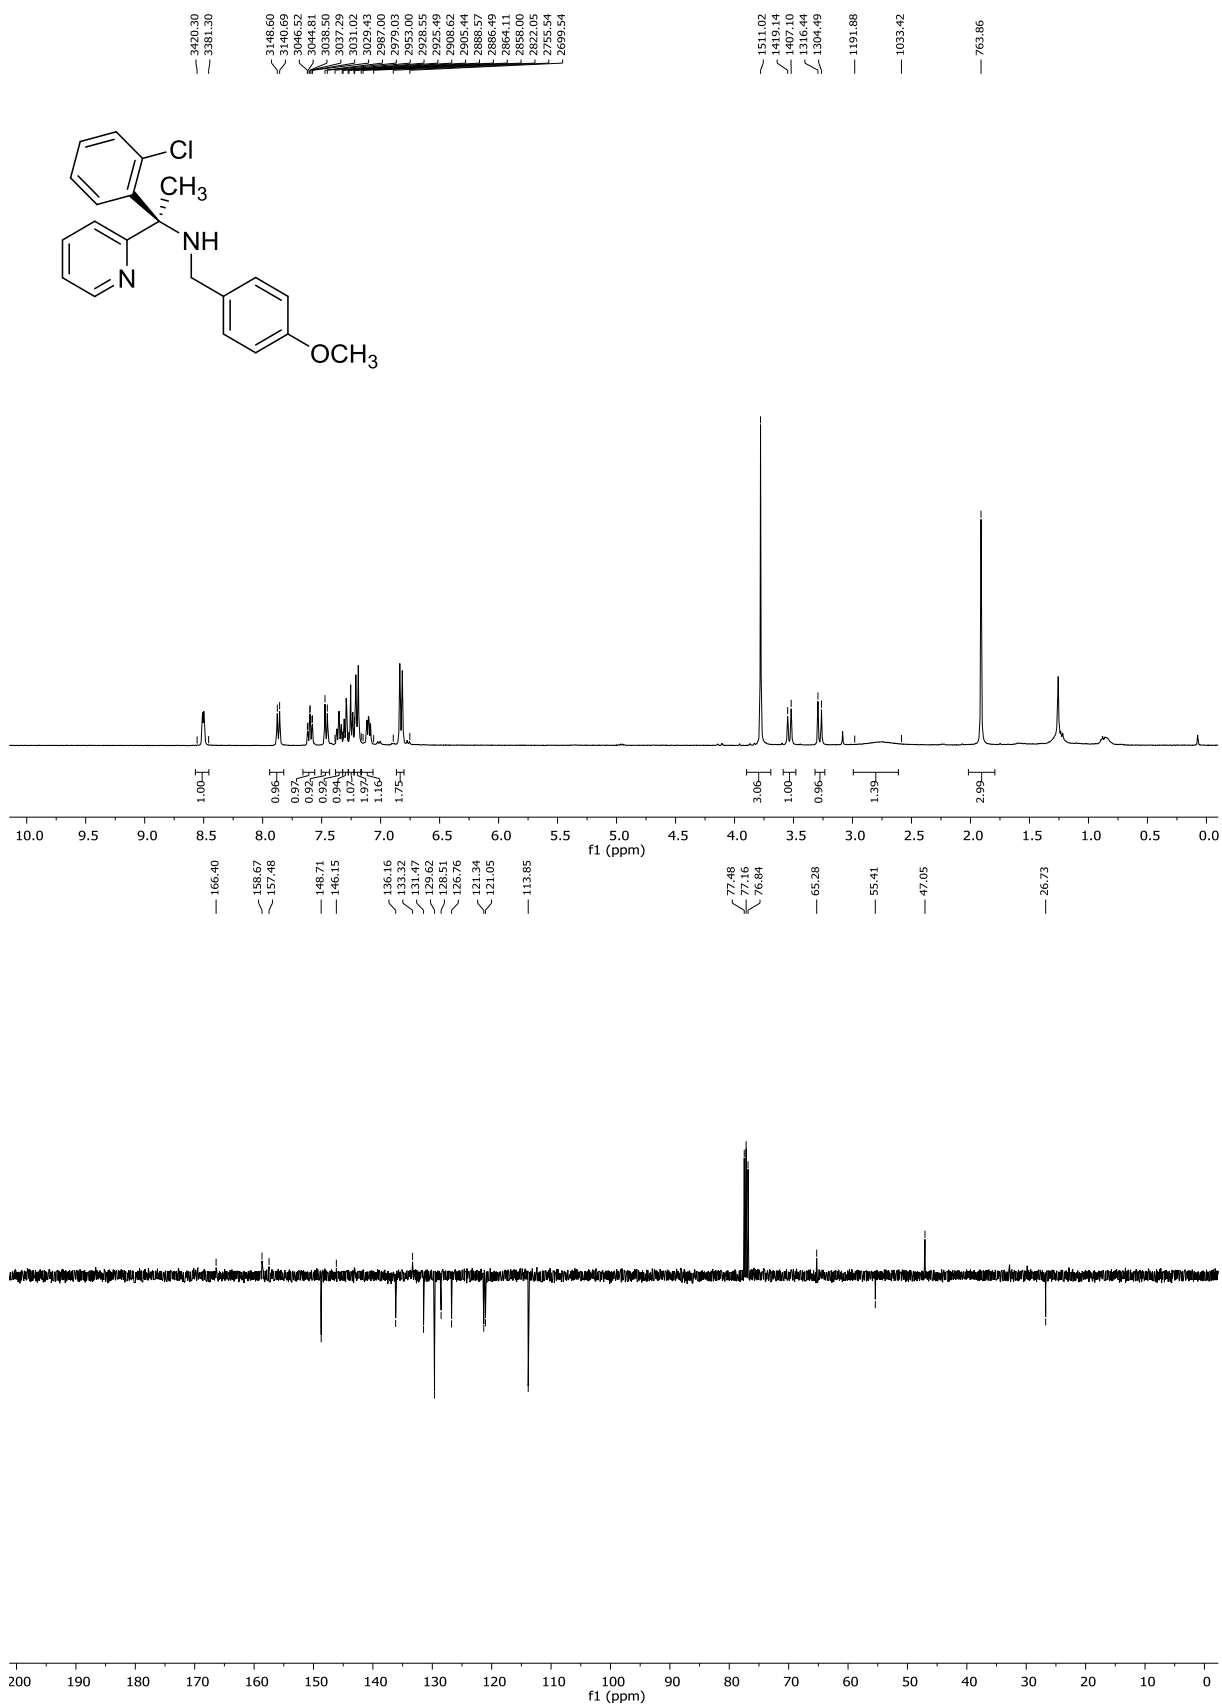

16f

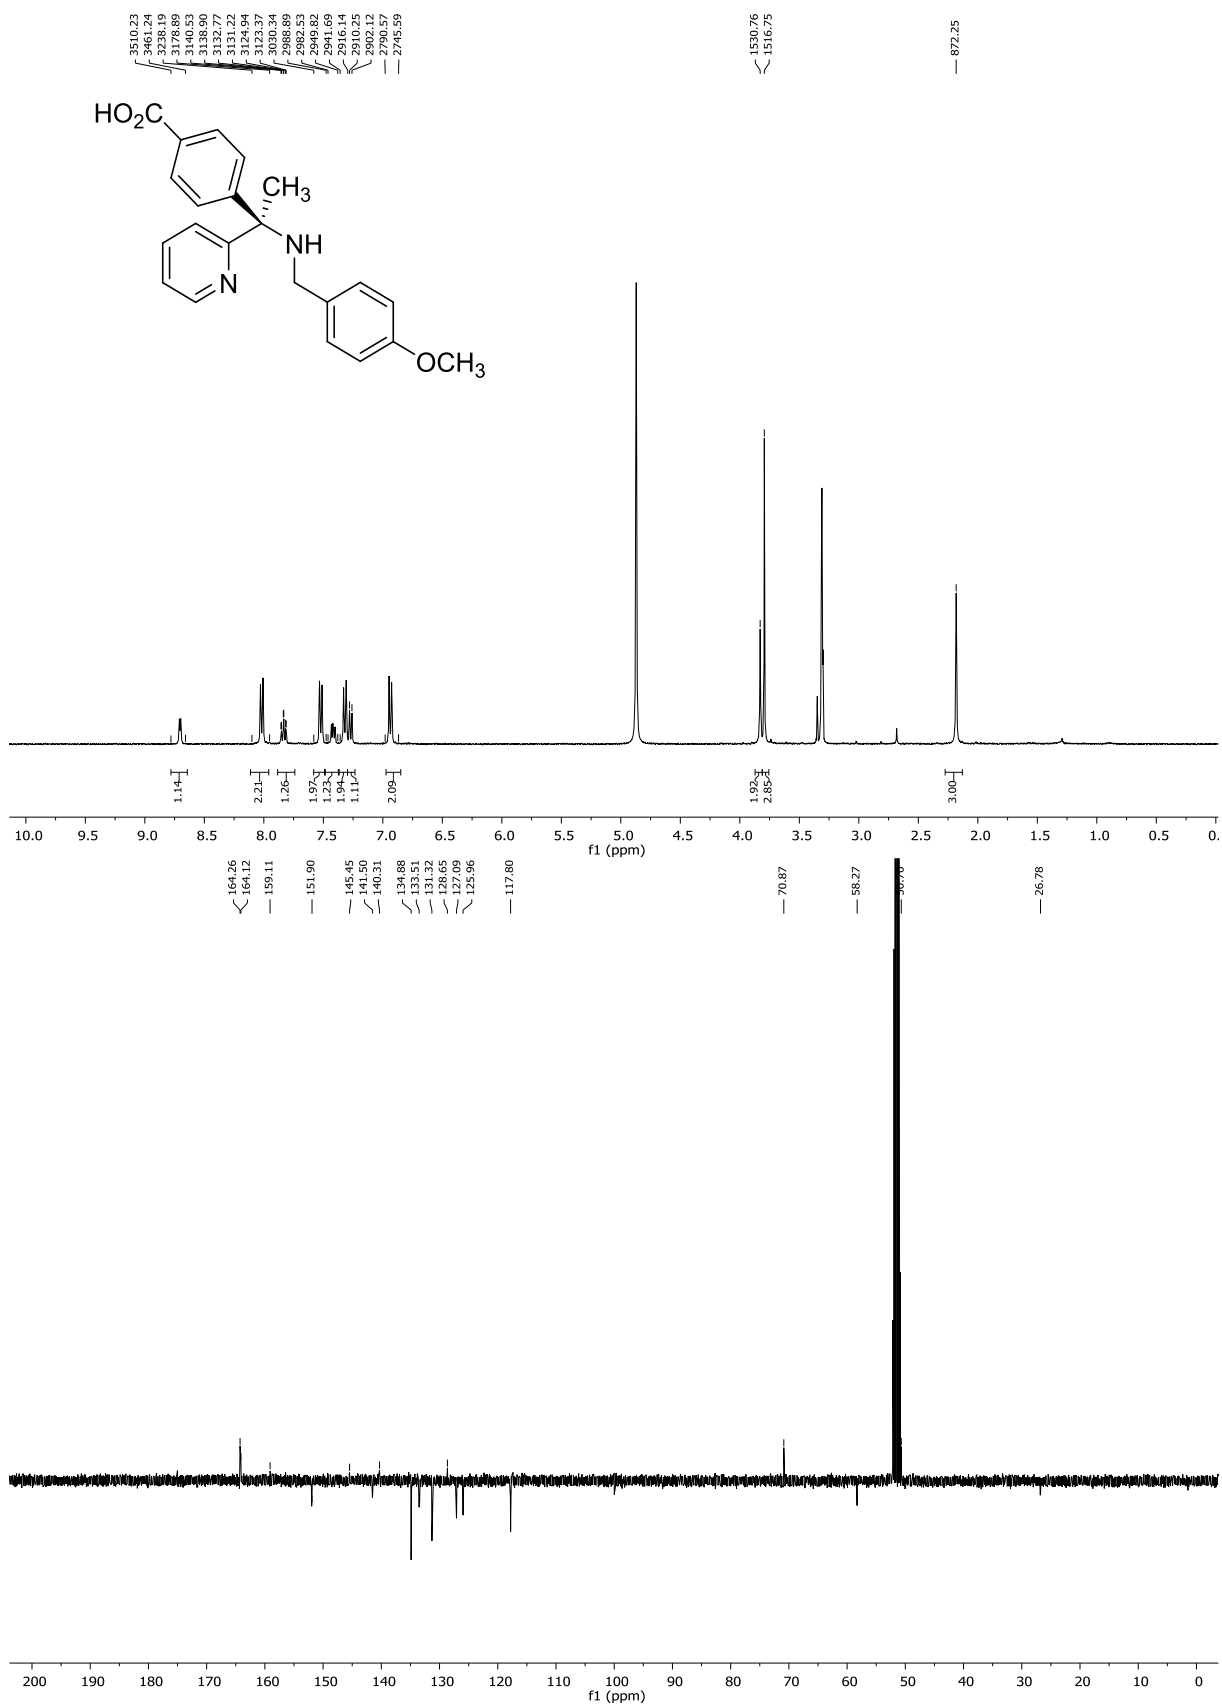

## HPLC data

**8a** : CHIRALPAK® AD-H 5 µm LC Column 250 x 4.6 mm, 90:10 hexane-IPA, 1 mL/min, 254 nm

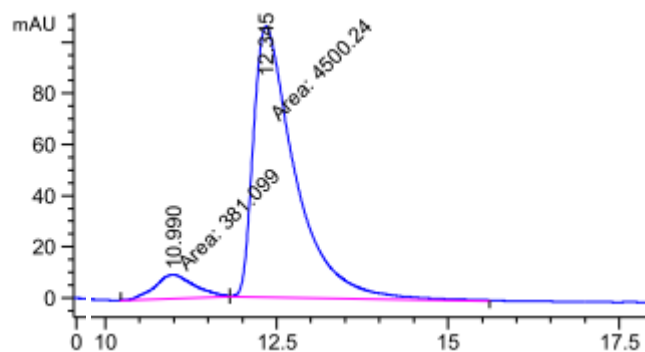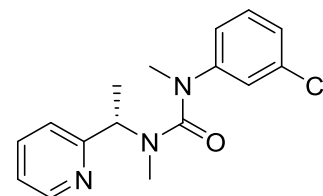

Signal 1: DAD1 A, Sig=254,4 Ref=360,100

| Peak # | RetTime [min] | Type | Width [min] | Area [mAU*s] | Height [mAU] | Area %  |
|--------|---------------|------|-------------|--------------|--------------|---------|
| 1      | 10.990        | MM   | 0.6792      | 381.09869    | 9.35218      | 7.8073  |
| 2      | 12.345        | MM   | 0.7080      | 4500.23926   | 105.93288    | 92.1927 |

**8b** : CHIRALPAK® AD-H 5 µm LC Column 250 x 4.6 mm, 90:10 hexane-IPA, 1 mL/min, 254 nm

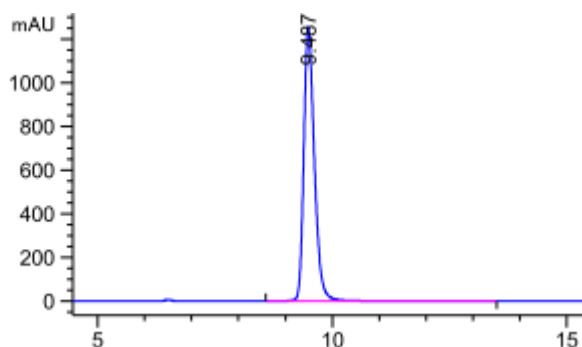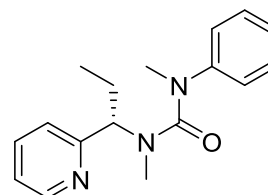

Signal 1: DAD1 A, Sig=254,4 Ref=360,100

| Peak # | RetTime [min] | Type | Width [min] | Area [mAU*s] | Height [mAU] | Area %   |
|--------|---------------|------|-------------|--------------|--------------|----------|
| 1      | 9.487         | BB   | 0.2424      | 1.98642e4    | 1256.81714   | 100.0000 |

**8c** : CHIRALPAK® AD-H 5 µm LC Column 250 x 4.6 mm, 90:10 hexane-IPA, 1 mL/min, 254 nm

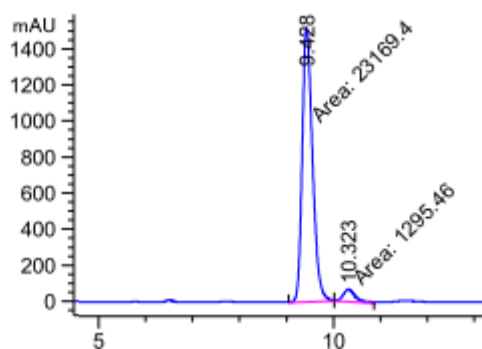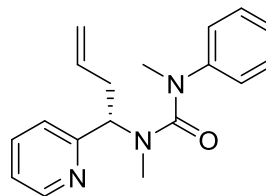

Signal 1: DAD1 A, Sig=254,4 Ref=360,100

| Peak # | RetTime [min] | Type | Width [min] | Area [mAU*s] | Height [mAU] | Area %  |
|--------|---------------|------|-------------|--------------|--------------|---------|
| 1      | 9.428         | MM   | 0.2546      | 2.31694e4    | 1516.86768   | 94.7048 |
| 2      | 10.323        | MM   | 0.3179      | 1295.46326   | 67.91454     | 5.2952  |

**11a** : Phenomenex LUX® 5 µm Amylose-1 LC Column 250 x 4.6 mm, 90:10 hexane-IPA, 1 mL/min, 254 nm

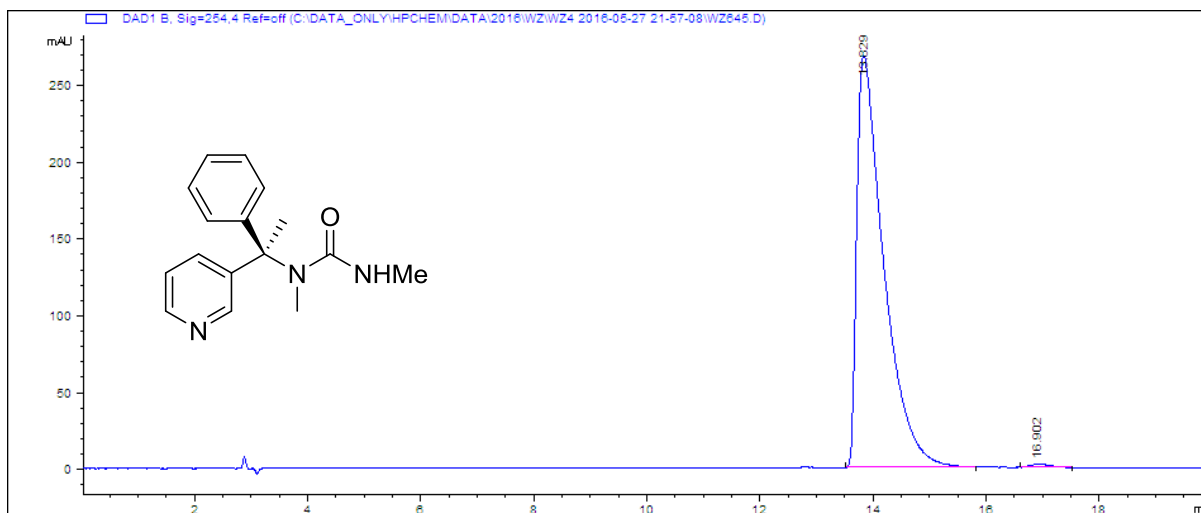

| # | Time   | Area   | Height | Width  | Area%  | Symmetry |
|---|--------|--------|--------|--------|--------|----------|
| 1 | 13.829 | 8886.2 | 268.3  | 0.4644 | 99.399 | 0.32     |
| 2 | 16.902 | 53.7   | 2.2    | 0.3035 | 0.601  | 0.588    |

**11b** : Phenomenex LUX® 5 µm Amylose-1 LC Column 250 x 4.6 mm, 90:10 hexane-IPA, 1 mL/min, 254 nm

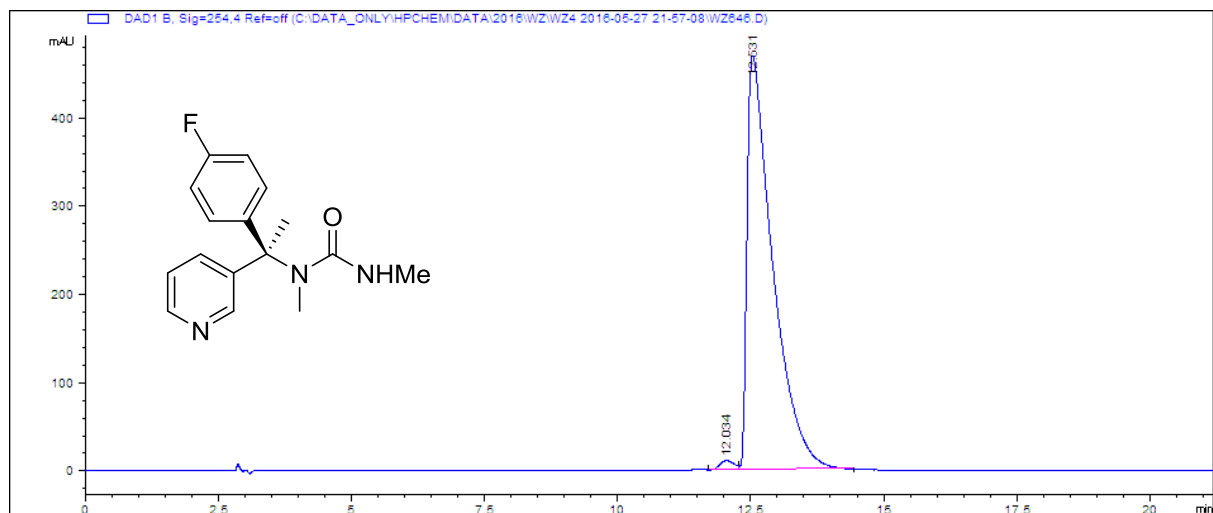

| # | Time   | Area    | Height | Width  | Area%  | Symmetry |
|---|--------|---------|--------|--------|--------|----------|
| 1 | 12.034 | 196.5   | 10.4   | 0.2675 | 1.234  | 0.829    |
| 2 | 12.531 | 15732.6 | 469.1  | 0.4692 | 98.766 | 0.26     |

**11c** : Phenomenex LUX® 5 µm Amylose-1 LC Column 250 x 4.6 mm, 90:10 hexane-IPA, 1 mL/min, 254 nm

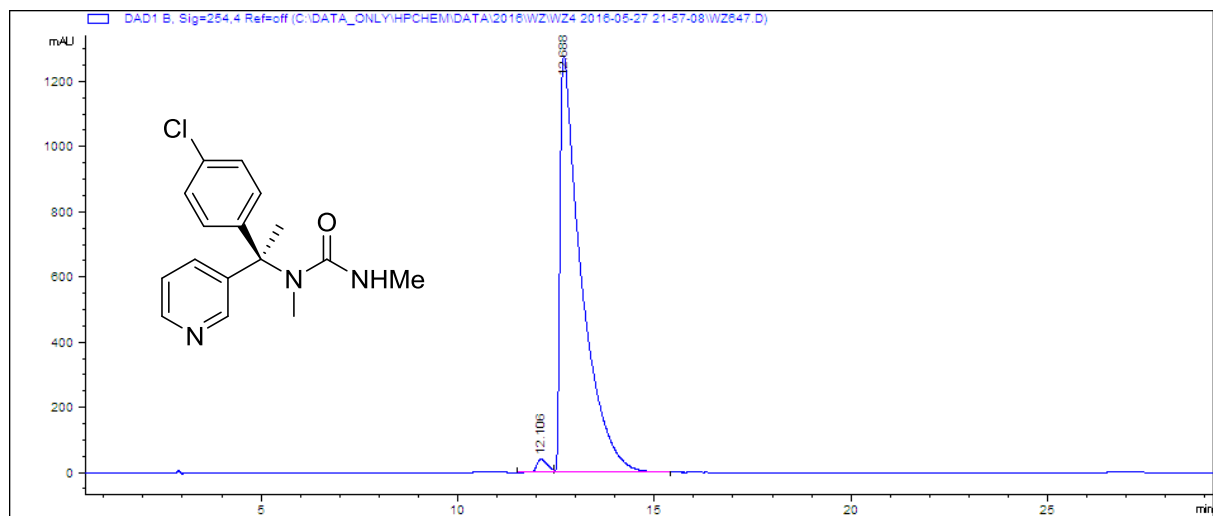

| # | Time   | Area    | Height | Width  | Area%  | Symmetry |
|---|--------|---------|--------|--------|--------|----------|
| 1 | 12.106 | 796.7   | 40.1   | 0.2915 | 1.634  | 0.646    |
| 2 | 12.688 | 47945.1 | 1279.3 | 0.4972 | 98.366 | 0.199    |

**11d** : Phenomenex LUX® 5 µm Amylose-1 LC Column 250 x 4.6 mm, 90:10 hexane-IPA, 1 mL/min, 254 nm

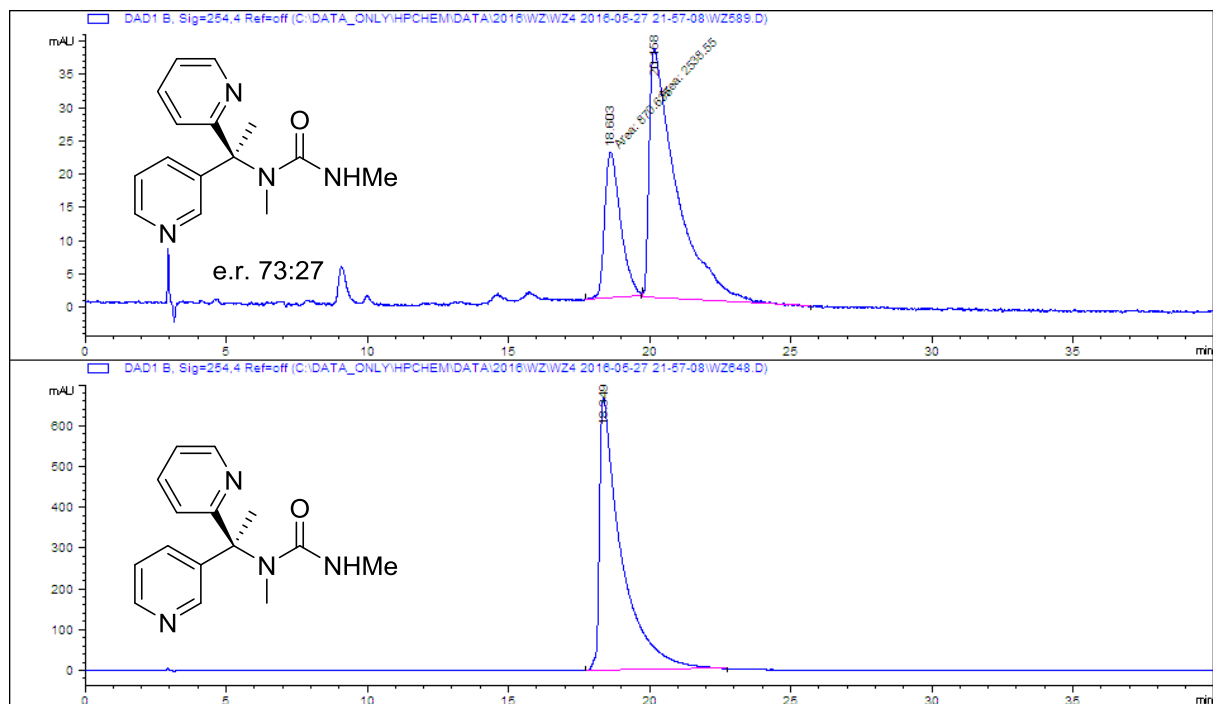

**11e** : Phenomenex LUX® 5 µm Amylose-1 LC Column 250 x 4.6 mm, 90:10 hexane-IPA, 1 mL/min, 254 nm

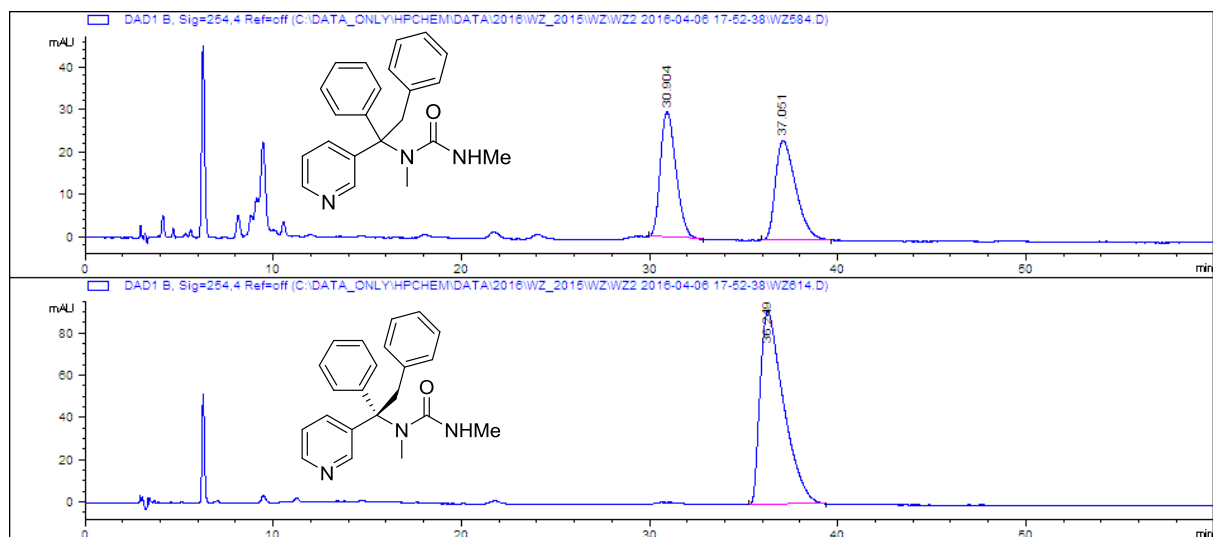

**11f:** Phenomenex LUX® 5 µm Amylose-1 LC Column 250 x 4.6 mm, 90:10 hexane-IPA, 1 mL/min, 254 nm

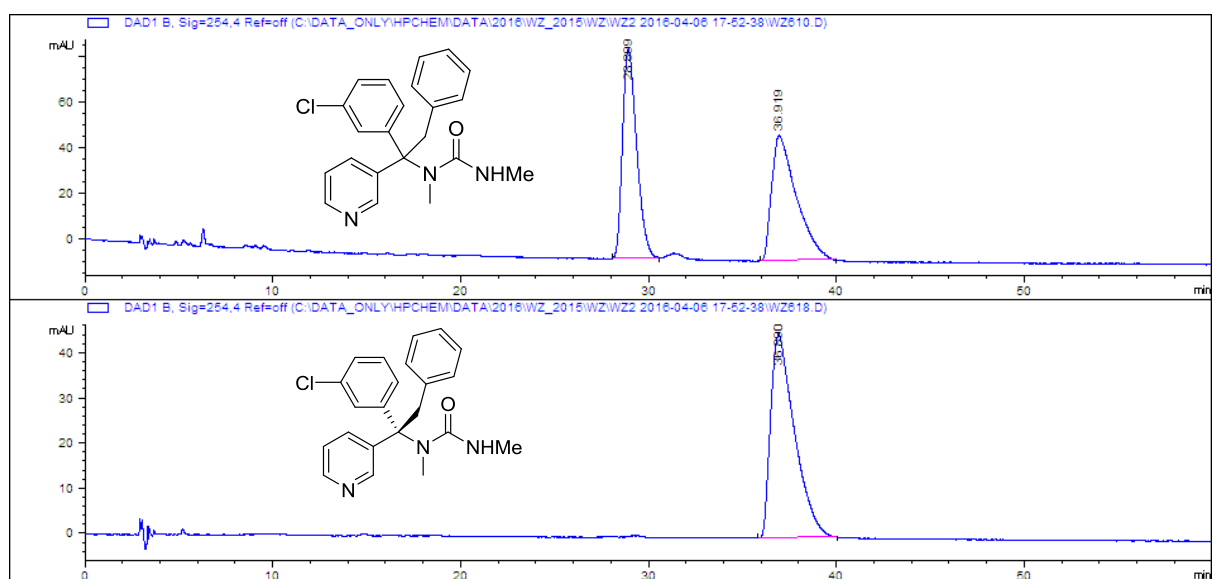

**11g** : Phenomenex LUX® 5 µm Amylose-1 LC Column 250 x 4.6 mm, 90:10 hexane-IPA, 1 mL/min, 254 nm

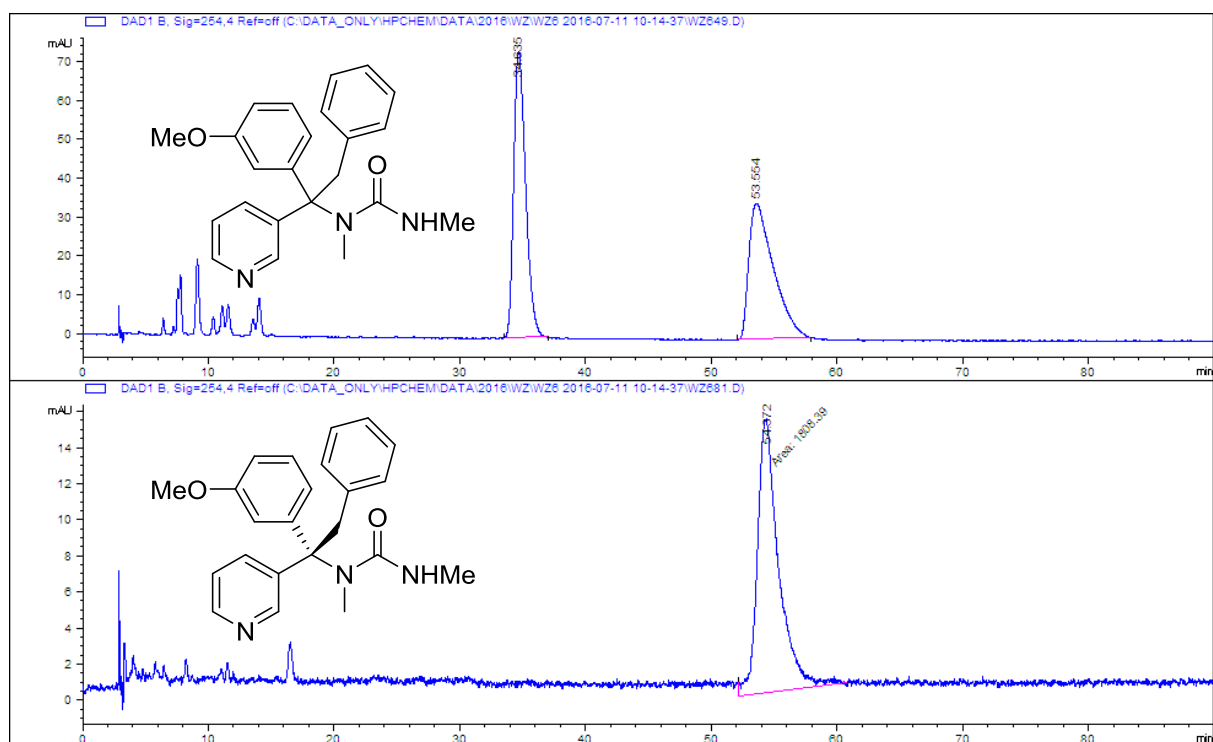

| # | Time   | Area   | Height | Width  | Area%  | Symmetry |
|---|--------|--------|--------|--------|--------|----------|
| 1 | 37.163 | 4098.4 | 55.3   | 0.873  | 54.364 | 0.617    |
| 2 | 58.026 | 3440.4 | 25     | 1.6159 | 45.636 | 0.517    |

**11h** : Phenomenex LUX® 5 µm Amylose-1 LC Column 250 x 4.6 mm, 90:10 hexane-IPA, 1 mL/min, 254 nm

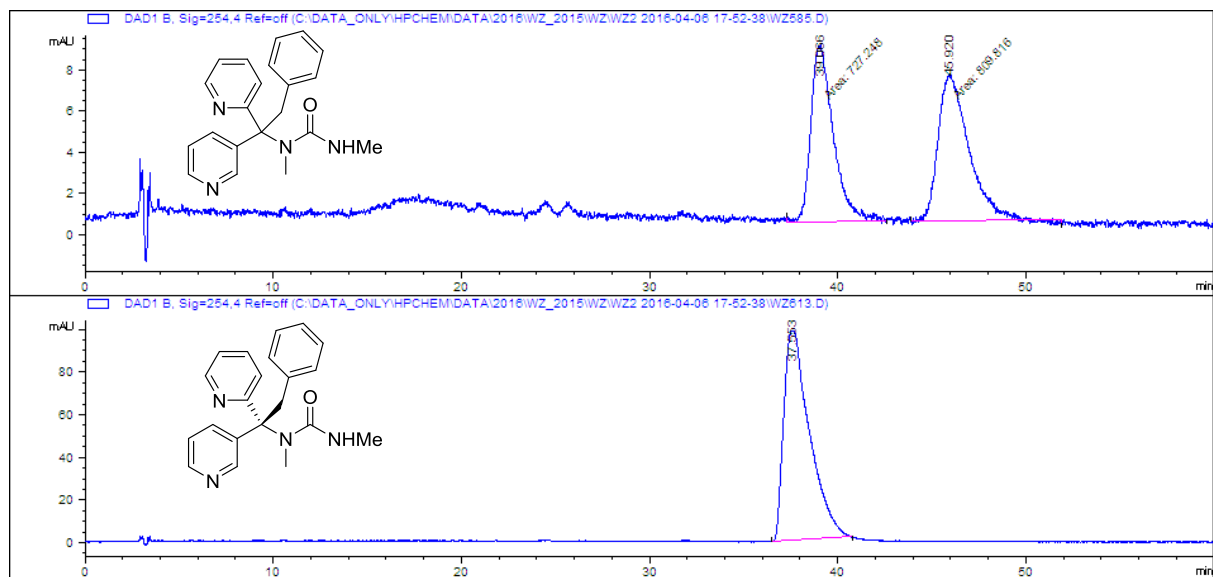

| # | Time   | Area  | Height | Width  | Area%  | Symmetry |
|---|--------|-------|--------|--------|--------|----------|
| 1 | 39.066 | 727.2 | 8.6    | 1.4106 | 47.314 | 0.739    |
| 2 | 45.92  | 809.8 | 7.1    | 1.896  | 52.686 | 0.589    |

**13**: Phenomenex LUX® 5 µm Amylose-1 LC Column 250 x 4.6 mm, 90:10 hexane-IPA, 1 mL/min, 254 nm

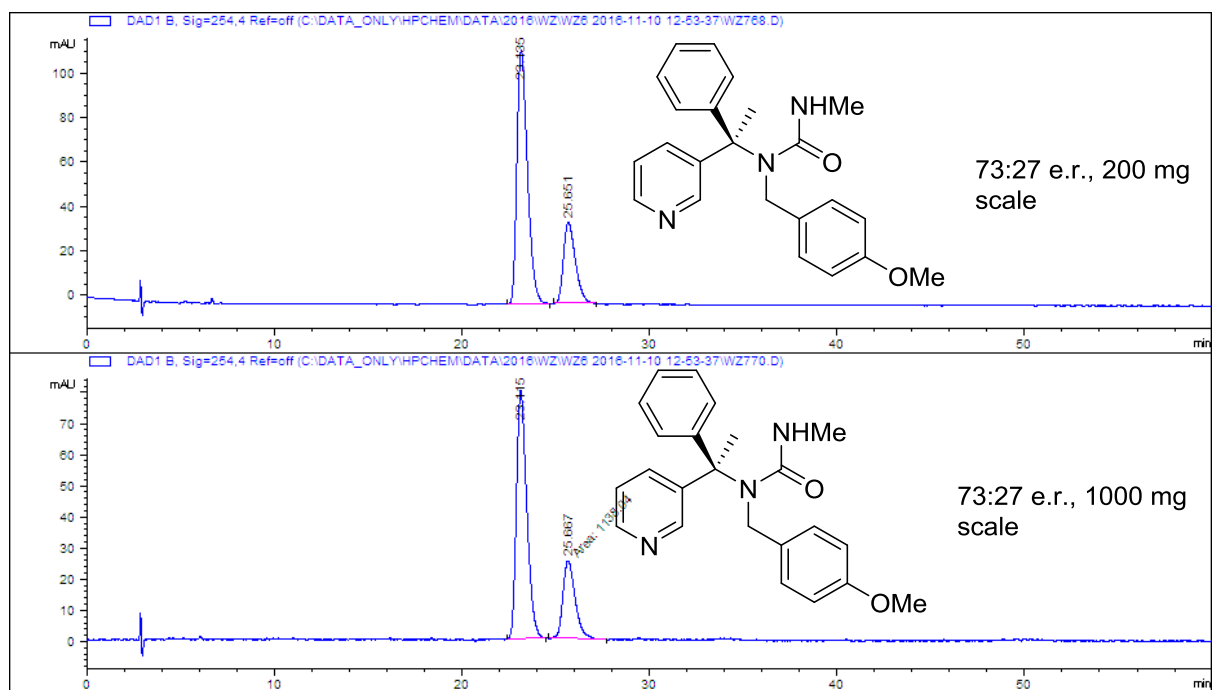

200 mg scale

| # | Time   | Area   | Height | Width  | Area%  | Symmetry |
|---|--------|--------|--------|--------|--------|----------|
| 1 | 23.135 | 4458.8 | 114.2  | 0.5996 | 73.306 | 0.636    |
| 2 | 25.651 | 1623.6 | 36.6   | 0.6299 | 26.694 | 0.653    |

1.00 g scale

| # | Time   | Area   | Height | Width  | Area%  | Symmetry |
|---|--------|--------|--------|--------|--------|----------|
| 1 | 23.115 | 3072.9 | 79.8   | 0.5615 | 72.974 | 0.681    |
| 2 | 25.667 | 1138   | 24.9   | 0.7607 | 27.026 | 0.645    |

**14a** : CHIRALPAK® AD-H 5 µm LC Column 250 x 4.6 mm, 85:15 hexane-IPA, 1 mL/min, 210 nm

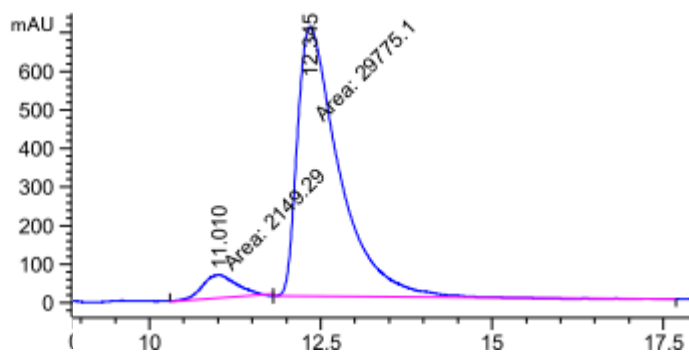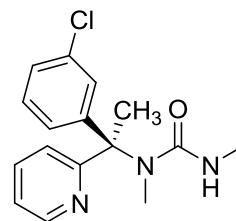

Signal 2: DAD1 C, Sig=210,8 Ref=360,100

| Peak # | RetTime [min] | Type | Width [min] | Area [mAU*s] | Height [mAU] | Area %  |
|--------|---------------|------|-------------|--------------|--------------|---------|
| 1      | 11.010        | MM   | 0.5926      | 2149.28882   | 60.44871     | 6.7324  |
| 2      | 12.345        | MM   | 0.7126      | 2.97751e4    | 696.35681    | 93.2676 |

**14b** : CHIRALPAK® AD-H 5 µm LC Column 250 x 4.6 mm, 90:10 hexane-IPA, 1 mL/min, 254 nm

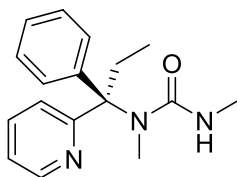

**At -78 °C :**

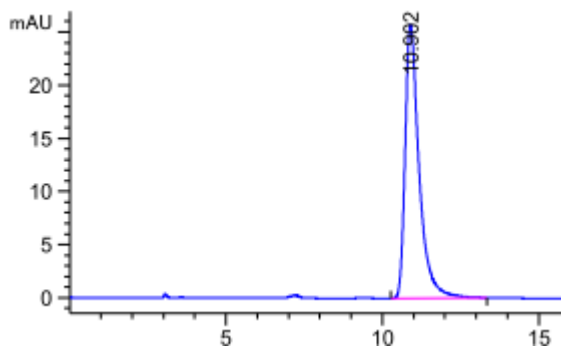

Signal 2: DAD1 B, Sig=210,4 Ref=360,100

| Peak # | RetTime [min] | Type | Width [min] | Area [mAU*s] | Height [mAU] | Area %   |
|--------|---------------|------|-------------|--------------|--------------|----------|
| 1      | 10.902        | BB   | 0.4629      | 3812.61108   | 122.56915    | 100.0000 |

**At -40 °C :**

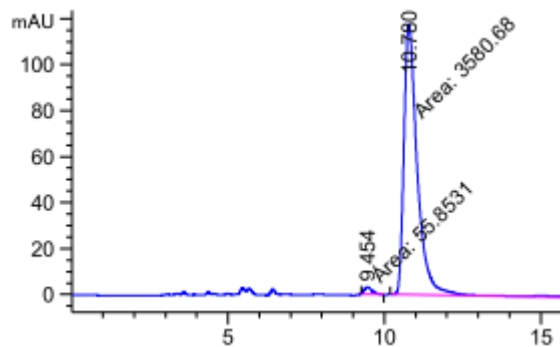

Signal 2: DAD1 B, Sig=210,4 Ref=360,100

| Peak # | RetTime [min] | Type | Width [min] | Area [mAU*s] | Height [mAU] | Area %  |
|--------|---------------|------|-------------|--------------|--------------|---------|
| 1      | 9.452         | MM   | 0.4783      | 325.75943    | 11.35186     | 1.9338  |
| 2      | 10.780        | MM   | 0.4935      | 1.65200e4    | 557.91547    | 98.0662 |

At-RT:

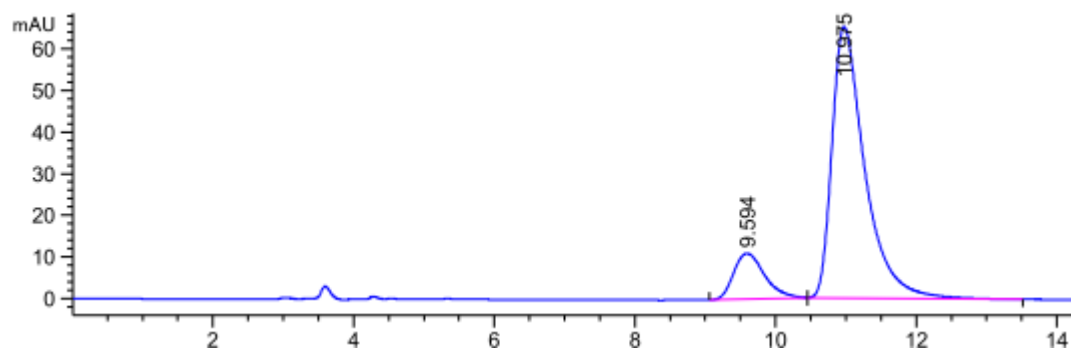

Signal 2: DAD1 B, Sig=210,4 Ref=360,100

| Peak # | RetTime [min] | Type | Width [min] | Area [mAU*s] | Height [mAU] | Area %  |
|--------|---------------|------|-------------|--------------|--------------|---------|
| 1      | 9.594         | BV   | 0.4888      | 1686.06079   | 53.04249     | 14.1670 |
| 2      | 10.975        | VB   | 0.4911      | 1.02153e4    | 309.43759    | 85.8330 |

**14c** : CHIRALPAK® AD-H 5 µm LC Column 250 x 4.6 mm, 90:10 hexane-IPA, 1 mL/min, 254 nm

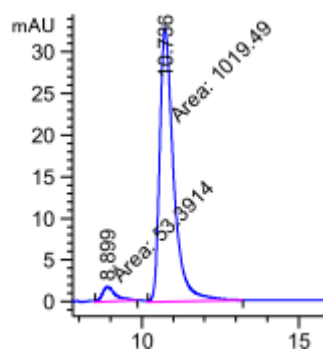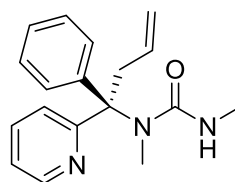

Signal 1: DAD1 A, Sig=254,4 Ref=360,100

| Peak # | RetTime [min] | Type | Width [min] | Area [mAU*s] | Height [mAU] | Area %  |
|--------|---------------|------|-------------|--------------|--------------|---------|
| 1      | 8.899         | MM   | 0.4987      | 53.39144     | 1.78439      | 4.9764  |
| 2      | 10.736        | MM   | 0.5158      | 1019.49408   | 32.94215     | 95.0236 |

**15a** : CHIRALPAK® AD-H 5 µm LC Column 250 x 4.6 mm, 90:10 hexane-IPA, 1 mL/min, 254 nm

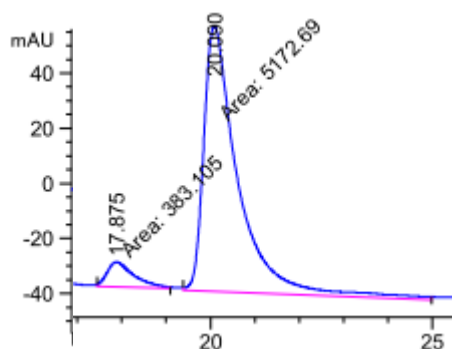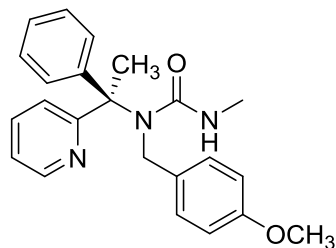

Signal 1: DAD1 A, Sig=254,4 Ref=360,100

| Peak # | RetTime [min] | Type | Width [min] | Area [mAU*s] | Height [mAU] | Area %  |
|--------|---------------|------|-------------|--------------|--------------|---------|
| 1      | 17.875        | MM   | 0.7054      | 383.10529    | 9.05111      | 6.8956  |
| 2      | 20.090        | MM   | 0.8961      | 5172.68652   | 96.20653     | 93.1044 |

**15b** : CHIRALPAK® AD-H 5 µm Column 250 x 4.6 mm, 90:10 hexane-IPA, 1 mL/min, 210.4 nm

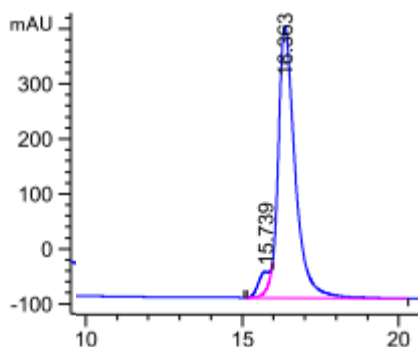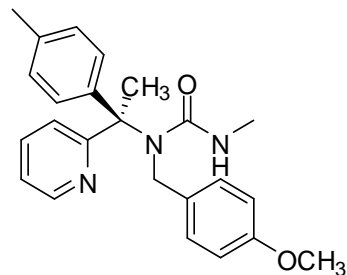

Signal 2: DAD1 B, Sig=210,4 Ref=360,100

| Peak # | RetTime [min] | Type | Width [min] | Area [mAU*s] | Height [mAU] | Area %  |
|--------|---------------|------|-------------|--------------|--------------|---------|
| 1      | 15.739        | BV E | 0.3682      | 846.94214    | 34.76965     | 4.3293  |
| 2      | 16.363        | VB R | 0.5629      | 1.87161e4    | 492.98035    | 95.6707 |

**15c** : CHIRALPAK® AD-H 5 µm LC Column 250 x 4.6 mm, 90:10 hexane-IPA, 1 mL/min, 254 nm

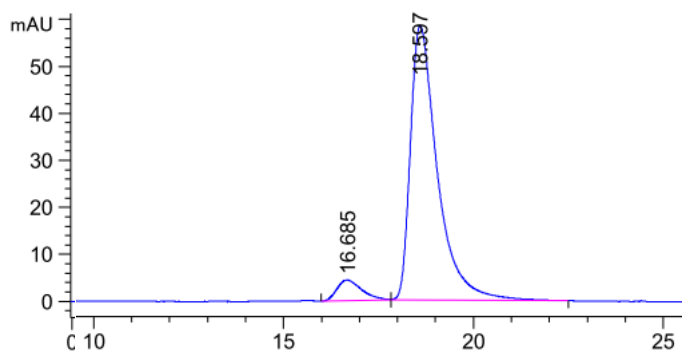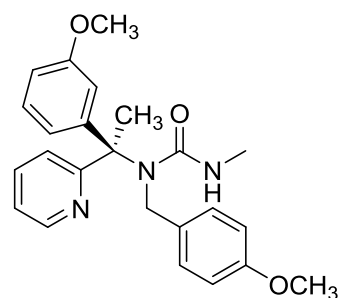

Signal 1: DAD1 A, Sig=254,4 Ref=360,100

| Peak # | RetTime [min] | Type | Width [min] | Area [mAU*s] | Height [mAU] | Area %  |
|--------|---------------|------|-------------|--------------|--------------|---------|
| 1      | 16.685        | BB   | 0.5405      | 195.72812    | 4.35365      | 6.3669  |
| 2      | 18.597        | BB   | 0.7201      | 2878.44189   | 58.28962     | 93.6331 |

**15d** : CHIRALPAK® AD-H 5 µm LC Column 250 x 4.6 mm, 90:10 hexane-IPA, 1 mL/min, 254 nm

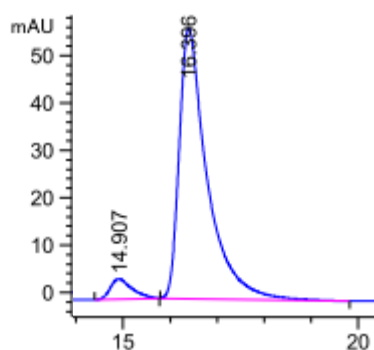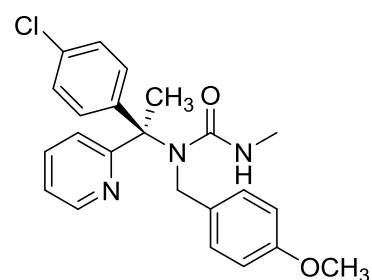

Signal 1: DAD1 A, Sig=254,4 Ref=360,100

| Peak # | RetTime [min] | Type | Width [min] | Area [mAU*s] | Height [mAU] | Area %  |
|--------|---------------|------|-------------|--------------|--------------|---------|
| 1      | 14.907        | BB   | 0.4735      | 135.96097    | 4.24698      | 5.4596  |
| 2      | 16.396        | BB   | 0.5971      | 2354.35156   | 56.85265     | 94.5404 |

**15e** : CHIRALPAK® AD-H 5 µm LC Column 250 x 4.6 mm, 85:15 hexane-IPA, 1 mL/min, 254 nm

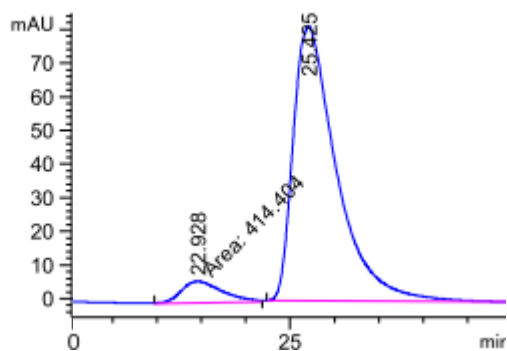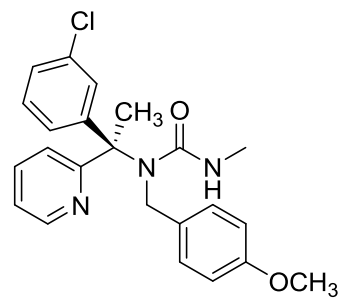

| Peak # | RetTime [min] | Type | Width [min] | Area [mAU*s] | Height [mAU] | Area %  |
|--------|---------------|------|-------------|--------------|--------------|---------|
| 1      | 22.928        | MM   | 1.0764      | 414.40408    | 6.41670      | 6.9338  |
| 2      | 25.425        | BBA  | 1.0069      | 5562.18359   | 81.64005     | 93.0662 |

**15f** : CHIRALPAK® AD-H 5 µm LC Column 250 x 4.6 mm, 90:10 hexane-IPA, 1 mL/min, 230.4 nm

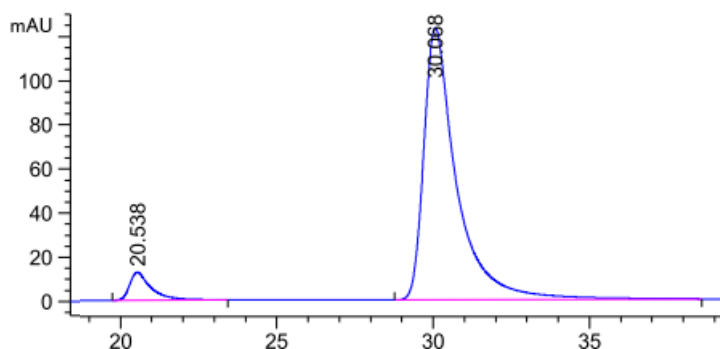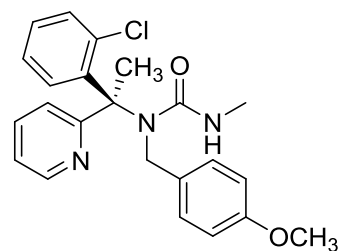

Signal 4: DAD1 D, Sig=230,4 Ref=360,100

| Peak # | RetTime [min] | Type | Width [min] | Area [mAU*s] | Height [mAU] | Area %  |
|--------|---------------|------|-------------|--------------|--------------|---------|
| 1      | 20.538        | BB   | 0.6862      | 601.03552    | 12.56179     | 6.2515  |
| 2      | 30.068        | BB   | 1.0576      | 9013.16895   | 122.89481    | 93.7485 |

**15g** : CHIRALPAK® AD-H 5 µm LC Column 250 x 4.6 mm, 90:10 hexane-IPA, 1 mL/min, 254 nm

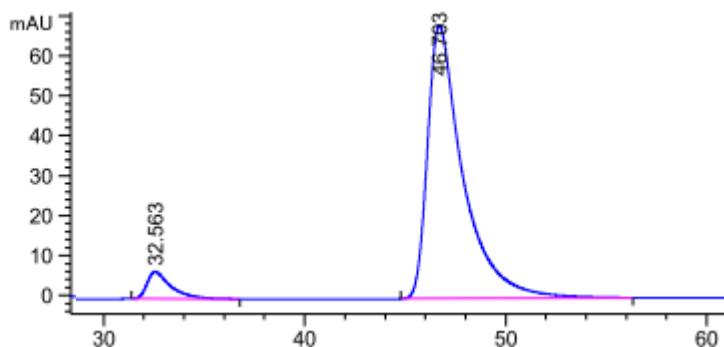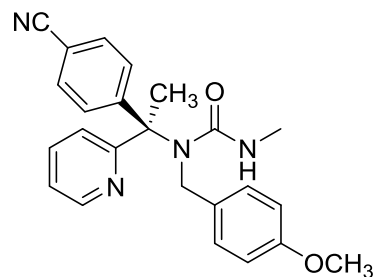

Signal 1: DAD1 A, Sig=254,4 Ref=360,100

| Peak # | RetTime [min] | Type | Width [min] | Area [mAU*s] | Height [mAU] | Area %  |
|--------|---------------|------|-------------|--------------|--------------|---------|
| 1      | 32.563        | BB   | 1.1684      | 561.90320    | 6.78379      | 6.2634  |
| 2      | 46.703        | BB   | 1.7692      | 8409.32227   | 68.36113     | 93.7366 |

**15h** : CHIRALPAK® AD-H 5 µm LC Column 250 x 4.6 mm, 90:10 hexane-IPA, 1 mL/min, 210.4 nm

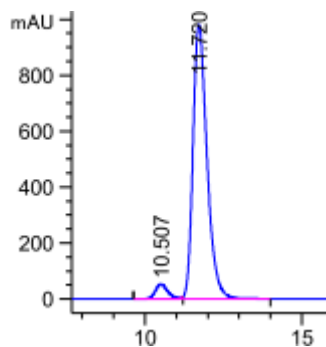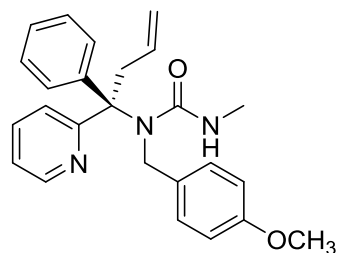

Signal 2: DAD1 B, Sig=210,4 Ref=360,100

| Peak # | RetTime [min] | Type | Width [min] | Area [mAU*s] | Height [mAU] | Area %  |
|--------|---------------|------|-------------|--------------|--------------|---------|
| 1      | 10.507        | BV E | 0.4170      | 1762.75281   | 64.86910     | 4.5262  |
| 2      | 11.720        | VB R | 0.4768      | 3.71832e4    | 1195.57593   | 95.4738 |

## Determination of d.r. in 3aa, and e.r. in the corresponding compounds 17a-d and 7a-d

To determine the exact diastereomeric ratio in **3a**, at a later stage of the synthesis **5a** was converted to **7b** and **7c** and the e.r. of the compounds was measured by chiral HPLC.

Phenomenex LUX® 5 µm Cellulose-3 LC Column 250 x 4.6 mm, 90:10 hexane-IPA, 1 mL/min, 254 nm

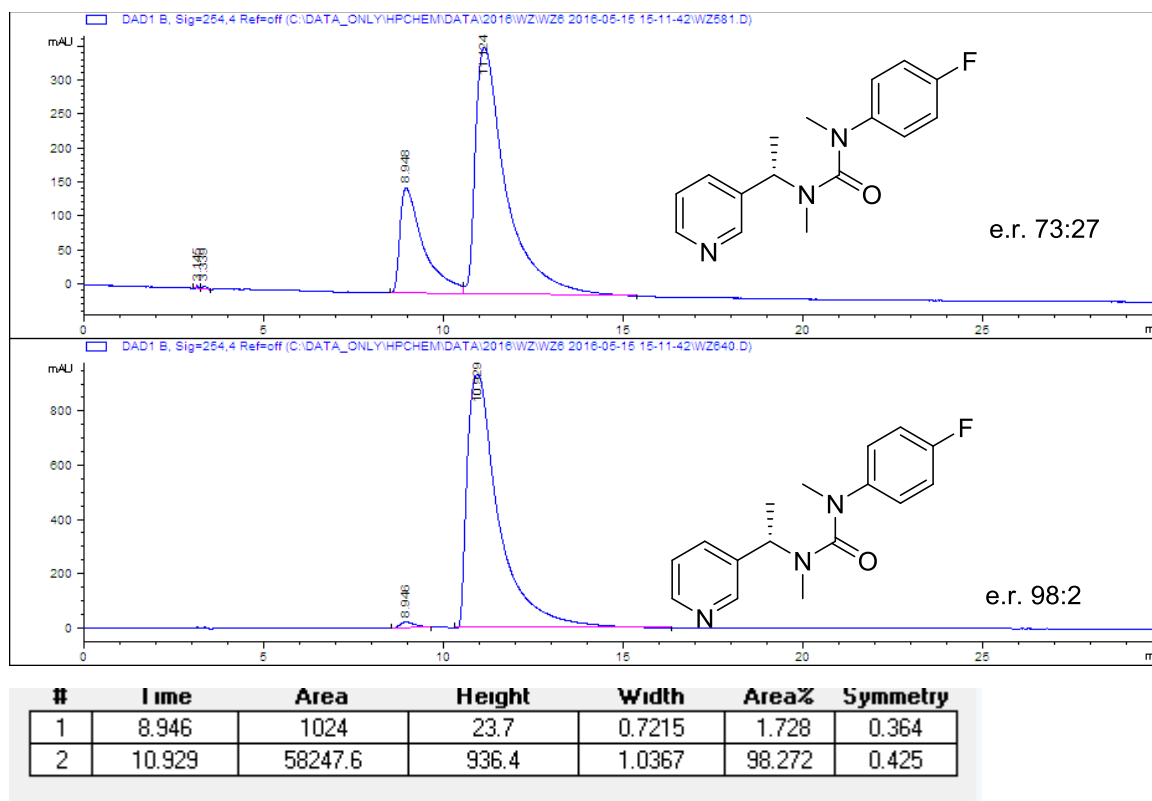

Phenomenex LUX® 5 µm Cellulose-3 LC Column 250 x 4.6 mm, 90:10 hexane-IPA, 1 mL/min, 254 nm

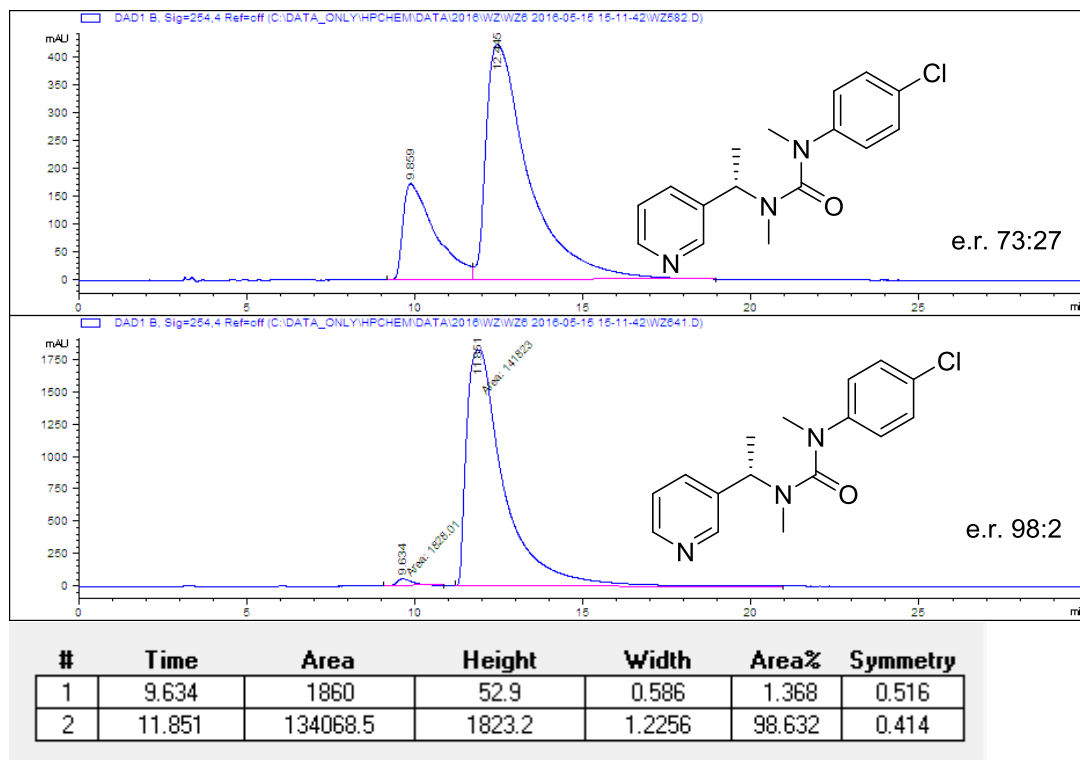

## X-RAY

Table 1. Crystallographic data and structure refinement for compound (*R*)-**11c**; the Cambridge Crystallographic Data Centre (CCDC) code is 1519696

|                                   |                                                     |          |
|-----------------------------------|-----------------------------------------------------|----------|
| Identification code               | 1519696                                             |          |
| Empirical formula                 | C <sub>16</sub> H <sub>18</sub> Cl N <sub>3</sub> O |          |
| Formula weight                    | 303.78                                              |          |
| Temperature                       | 100(2) K                                            |          |
| Wavelength                        | 1.54178 Å                                           |          |
| Crystal system                    | Orthorhombic                                        |          |
| Space group                       | P2 <sub>1</sub> 2 <sub>1</sub> 2 <sub>1</sub>       |          |
| Unit cell dimensions              | a = 8.54450(10) Å                                   | α = 90°. |
|                                   | b = 9.1514(2) Å                                     | β = 90°. |
|                                   | c = 19.7296(4) Å                                    | γ = 90°. |
| Volume                            | 1542.74(5) Å <sup>3</sup>                           |          |
| Z                                 | 4                                                   |          |
| Density (calculated)              | 1.308 Mg/m <sup>3</sup>                             |          |
| Absorption coefficient            | 2.207 mm <sup>-1</sup>                              |          |
| F(000)                            | 640                                                 |          |
| Crystal size                      | 0.250 x 0.150 x 0.080 mm <sup>3</sup>               |          |
| Theta range for data collection   | 4.482 to 72.143°.                                   |          |
| Index ranges                      | -10 ≤ h ≤ 10, -11 ≤ k ≤ 11, -23 ≤ l ≤ 17            |          |
| Reflections collected             | 18119                                               |          |
| Independent reflections           | 3026 [R(int) = 0.0404]                              |          |
| Completeness to theta = 67.679°   | 99.7 %                                              |          |
| Absorption correction             | Semi-empirical from equivalents                     |          |
| Max. and min. transmission        | 0.843 and 0.767605                                  |          |
| Refinement method                 | Full-matrix least-squares on F <sup>2</sup>         |          |
| Data / restraints / parameters    | 3026 / 0 / 197                                      |          |
| Goodness-of-fit on F <sup>2</sup> | 1.040                                               |          |
| Final R indices [I > 2σ(I)]       | R1 = 0.0247, wR2 = 0.0617                           |          |
| R indices (all data)              | R1 = 0.0261, wR2 = 0.0623                           |          |
| Absolute structure parameter      | 0.031(6)                                            |          |
| Extinction coefficient            | n/a                                                 |          |
| Largest diff. peak and hole       | 0.184 and -0.257 e.Å <sup>-3</sup>                  |          |
